# Supplementary material for: Consortia of anti-nematode fungi and bacteria in the rhizosphere of soybean plants attacked by root-knot nematodes
Source: PubMed Central journal article supplement (PMC6458363; doi:10.1098/rsos.181693), 2019-03-27
Supplement: rsos181693_review_history.pdf [file rsos181693_review_history.pdf]

## **Consortia of anti-nematode fungi and bacteria in the rhizosphere of soya bean plants attacked by root-knot nematodes**

Hirokazu Toju and Yu Tanaka

### **Article citation details**

*R. Soc. open sci.* **6**: 181693.

<http://dx.doi.org/10.1098/rsos.181693>

### **Review timeline**

Original submission: 10 October 2018  
1st revised submission: 22 January 2019  
2nd revised submission: 20 February 2019  
Final acceptance: 21 February 2019

Note: Reports are unedited and appear as submitted by the referee. The review history appears in chronological order.

## Review History

### RSOS-181693.R0 (Original submission)

#### Review form: Reviewer 1

**Is the manuscript scientifically sound in its present form?**

Yes

**Are the interpretations and conclusions justified by the results?**

Yes

**Is the language acceptable?**

Yes

**Is it clear how to access all supporting data?**

Yes

**Do you have any ethical concerns with this paper?**

No

**Have you any concerns about statistical analyses in this paper?**

I do not feel qualified to assess the statistics

**Recommendation?**

Accept with minor revision (please list in comments)

**Comments to the Author(s)**

The study investigated bacterial and fungal communities in root and rhizosphere of healthy and diseased soybean plants, affected by root-knot nematodes, in two rows of a field. Several OTU were identified that preferentially occurred on healthy or affected plants, and their connections in microbe-microbe networks described. The experimental design was very good. The data are well presented and conclusions supported by the data. I suggest to better discuss the underlying mechanisms or consequences of preferential occurrence of OTU. Those OTU on healthy plants might indicate their role in protecting the plant from nematode attack. Preferential OTU on diseased plants might live on the nematodes (following nematode population dynamics but not controlling it), or simply profit from resource leakage of diseased roots.

Minor comments:

L. 31-37: add summary of OTU preferentially occurring on healthy plants; remove list of nemativororous species.

L. Is "awaited" the right word?

L. 132 square

L. 226, 228 randomized

L. 273 better describe this OTU: SH group in UNITE?

L. 348 plays

L. 364 lilacinum

L. 379 Calonectria

L. 534, 547, 549, 620 (

L. 695, 704 volume, pages missing

**Review form: Reviewer 2****Is the manuscript scientifically sound in its present form?**

Yes

**Are the interpretations and conclusions justified by the results?**

Yes

**Is the language acceptable?**

Yes

**Is it clear how to access all supporting data?**

Yes

**Do you have any ethical concerns with this paper?**

No

**Have you any concerns about statistical analyses in this paper?**

I do not feel qualified to assess the statistics

**Recommendation?**

Major revision is needed (please make suggestions in comments)

**Comments to the Author(s)**

This paper dealt with relationship between microbial communities in rhizosphere and root of soybean plants and the infection by root-knot nematodes. Interestingly, authors sampling the soybean individual in the one field plot and separate the soybean individuals into three groups (normal, yellow and no leaf) corresponding to the infection of root-knot nematodes. Overall, the manuscript is well-written, methods and results are well presented and conclusions are fully justified.

However, the significantly weaknesses are that there were no any data on the nematode infections. It is quite easy to measure the root-knot index, which is quite necessary to explain how serious of the plants infected by nematode. Moreover, the infection of the nematodes (secondary-stage juveniles) occurred in the seedling stage of the plants. However, sampling was conducted at the late stage of the soybean. It is quite hard to correlate the microbes in the rhizosphere soil and roots to the nematode damaging. Although there are some relationships between some nematophagous microbes previously reported and nematode damaging, most of those microbes could survive as saprophytes in the soil. The other key issue is that root-knot nematode is kind of animals and many microbes can colonize on the different stages of root-knot nematode.

However, there was no any examination on the microbial community on nematode.

Following are some recent papers that may have reference value to help promote the significance of this manuscript:

The analysis of rhizosphere microbial communities during an invasion by *Ralstonia solanacearum* (Wei et al., *Ralstonia solanacearum* pathogen disrupts bacterial rhizosphere microbiome during an invasion, 2018), besides, the results on rhizosphere, root and cyst microbial communities in disease suppressive soil provide more insights into consortia of anti-nematode bacteria (Hussain et al., *Bacterial community assemblages in the rhizosphere soil, root endosphere and cyst of soybean cyst nematode-suppressive soil challenged with nematodes*, 2018).

**Review form: Reviewer 3 (Paul Orwin)**

**Is the manuscript scientifically sound in its present form?**

Yes

**Are the interpretations and conclusions justified by the results?**

Yes

**Is the language acceptable?**

No

**Is it clear how to access all supporting data?**

Yes

**Do you have any ethical concerns with this paper?**

No

**Have you any concerns about statistical analyses in this paper?**

I do not feel qualified to assess the statistics

**Recommendation?**

Accept with minor revision (please list in comments)

**Comments to the Author(s)**

I thought the overall science was sound, and the paper provides an interesting insight into the correlation between plant health, root-knot nematode colonization, and corresponding recruitment of nematophagous fungi and nematocidal bacteria to the root and rhizosphere. The paper makes a sound contribution to the literature on these complex interactions, and the authors are careful not to overinterpret their results. The only issue I found with the article was some minor formatting issues and some substantive grammatical concerns especially in the Summary, Introduction, and Discussion sections. These concerns are described in the attached review file (Appendix A).

**Decision letter (RSOS-181693.R0)**

09-Jan-2019

Dear Dr Toju,

The editors assigned to your paper ("Consortia of anti-nematode fungi and bacteria in the rhizosphere of soybean plants attacked by root-knot nematodes") have now received comments from reviewers. We would like you to revise your paper in accordance with the referee and Associate Editor suggestions which can be found below (not including confidential reports to the Editor). Please note this decision does not guarantee eventual acceptance.

Please submit a copy of your revised paper before 01-Feb-2019. Please note that the revision deadline will expire at 00.00am on this date. If we do not hear from you within this time then it will be assumed that the paper has been withdrawn. In exceptional circumstances, extensions may be possible if agreed with the Editorial Office in advance. We do not allow multiple rounds of revision so we urge you to make every effort to fully address all of the comments at this stage. If deemed necessary by the Editors, your manuscript will be sent back to one or more of the original reviewers for assessment. If the original reviewers are not available, we may invite new reviewers.

To revise your manuscript, log into <http://mc.manuscriptcentral.com/rsos> and enter your Author Centre, where you will find your manuscript title listed under "Manuscripts with Decisions." Under "Actions," click on "Create a Revision." Your manuscript number has been appended to denote a revision. Revise your manuscript and upload a new version through your Author Centre.

When submitting your revised manuscript, you must respond to the comments made by the referees and upload a file "Response to Referees" in "Section 6 - File Upload". Please use this to document how you have responded to the comments, and the adjustments you have made. In order to expedite the processing of the revised manuscript, please be as specific as possible in your response.

In addition to addressing all of the reviewers' and editor's comments please also ensure that your revised manuscript contains the following sections as appropriate before the reference list:

- Ethics statement (if applicable)

If your study uses humans or animals please include details of the ethical approval received, including the name of the committee that granted approval. For human studies please also detail

whether informed consent was obtained. For field studies on animals please include details of all permissions, licences and/or approvals granted to carry out the fieldwork.

- Data accessibility

It is a condition of publication that all supporting data are made available either as supplementary information or preferably in a suitable permanent repository. The data accessibility section should state where the article's supporting data can be accessed. This section should also include details, where possible of where to access other relevant research materials such as statistical tools, protocols, software etc can be accessed. If the data have been deposited in an external repository this section should list the database, accession number and link to the DOI for all data from the article that have been made publicly available. Data sets that have been deposited in an external repository and have a DOI should also be appropriately cited in the manuscript and included in the reference list.

If you wish to submit your supporting data or code to Dryad (<http://datadryad.org/>), or modify your current submission to dryad, please use the following link:  
<http://datadryad.org/submit?journalID=RSOS&manu=RSOS-181693>

- Competing interests

Please declare any financial or non-financial competing interests, or state that you have no competing interests.

- Authors' contributions

All submissions, other than those with a single author, must include an Authors' Contributions section which individually lists the specific contribution of each author. The list of Authors should meet all of the following criteria; 1) substantial contributions to conception and design, or acquisition of data, or analysis and interpretation of data; 2) drafting the article or revising it critically for important intellectual content; and 3) final approval of the version to be published.

All contributors who do not meet all of these criteria should be included in the acknowledgements.

We suggest the following format:

AB carried out the molecular lab work, participated in data analysis, carried out sequence alignments, participated in the design of the study and drafted the manuscript; CD carried out the statistical analyses; EF collected field data; GH conceived of the study, designed the study, coordinated the study and helped draft the manuscript. All authors gave final approval for publication.

- Acknowledgements

Please acknowledge anyone who contributed to the study but did not meet the authorship criteria.

- Funding statement

Please list the source of funding for each author.

Once again, thank you for submitting your manuscript to Royal Society Open Science and I look forward to receiving your revision. If you have any questions at all, please do not hesitate to get in touch.

Kind regards,  
Royal Society Open Science Editorial Office  
Royal Society Open Science

openscience@royalsociety.org

on behalf of Dr Berat Haznedaroglu (Associate Editor) and Professor Kevin Padian (Subject Editor)

openscience@royalsociety.org

Editor's comments:

Please consider carefully all the comments of the reviewers, who are largely positive about the manuscript but do have some substantial issues that need to be addressed.

Additionally, please have a native speaker of English edit the manuscript; we will not be able to accept it with extensive grammatical errors. Thanks for your submission and best of luck with your revision.

Reviewers' Comments to Author:

Reviewer: 1

Comments to the Author(s)

The study investigated bacterial and fungal communities in root and rhizosphere of healthy and diseased soybean plants, affected by root-knot nematodes, in two rows of a field. Several OTU were identified that preferentially occurred on healthy or affected plants, and their connections in microbe-microbe networks described. The experimental design was very good. The data are well presented and conclusions supported by the data. I suggest to better discuss the underlying mechanisms or consequences of preferential occurrence of OTU. Those OTU on healthy plants might indicate their role in protecting the plant from nematode attack. Preferential OTU on diseased plants might live on the nematodes (following nematode population dynamics but not controlling it), or simply profit from resource leakage of diseased roots.

Minor comments:

L. 31-37: add summary of OTU preferentially occurring on healthy plants; remove list of nemativororous species.

L. Is "awaited" the right word?

L. 132 square

L. 226, 228 randomized

L. 273 better describe this OTU: SH group in UNITE?

L. 348 plays

L. 364 lilacinum

L. 379 Calonectria

L. 534, 547, 549, 620 (

L. 695, 704 volume, pages missing

Reviewer: 2

Comments to the Author(s)

This paper dealt with relationship between microbial communities in rhizosphere and root of soybean plants and the infection by root-knot nematodes. Interestingly, authors sampling the soybean individual in the one field plot and separate the soybean individuals into three groups (normal, yellow and no leaf) corresponding to the infection of root-knot nematodes. Overall, the manuscript is well-written, methods and results are well presented and conclusions are fully justified.

However, the significantly weaknesses are that there were no any data on the nematode infections. It is quite easy to measure the root-knot index, which is quite necessary to explain how serious of the plants infected by nematode. Moreover, the infection of the nematodes (secondary-stage juveniles) occurred in the seedling stage of the plants. However, sampling was conducted at the late stage of the soybean. It is quite hard to correlate the microbes in the rhizosphere soil and roots to the nematode damaging. Although there are some relationships between some nematophagous microbes previously reported and nematode damaging, most of those microbes could survive as saprophytes in the soil. The other key issue is that root-knot nematode is kind of animals and many microbes can colonize on the different stages of root-knot nematode. However, there was no any examination on the microbial community on nematode. Following are some recent papers that may have reference value to help promote the significance of this manuscript:

The analysis of rhizosphere microbial communities during an invasion by *Ralstonia solanacearum* (Wei et al., *Ralstonia solanacearum* pathogen disrupts bacterial rhizosphere microbiome during an invasion, 2018), besides, the results on rhizosphere, root and cyst microbial communities in disease suppressive soil provide more insights into consortia of anti-nematode bacteria (Hussain et al., *Bacterial community assemblages in the rhizosphere soil, root endosphere and cyst of soybean cyst nematode-suppressive soil challenged with nematodes*, 2018).

Reviewer: 3

Comments to the Author(s)

I thought the overall science was sound, and the paper provides an interesting insight into the correlation between plant health, root-knot nematode colonization, and corresponding recruitment of nematophagous fungi and nematocidal bacteria to the root and rhizosphere. The paper makes a sound contribution to the literature on these complex interactions, and the authors are careful not to overinterpret their results. The only issue I found with the article was some minor formatting issues and some substantive grammatical concerns especially in the Summary, Introduction, and Discussion sections. These concerns are described in the attached review file.

## Author's Response to Decision Letter for (RSOS-181693.R0)

See Appendix B.

## RSOS-181693.R1 (Revision)

Review form: Reviewer 2

**Is the manuscript scientifically sound in its present form?**

Yes

**Are the interpretations and conclusions justified by the results?**

Yes

**Is the language acceptable?**

Yes

**Is it clear how to access all supporting data?**

Yes

**Do you have any ethical concerns with this paper?**

No

**Have you any concerns about statistical analyses in this paper?**

I do not feel qualified to assess the statistics

**Recommendation?**

Accept with minor revision (please list in comments)

**Comments to the Author(s)**

The manuscript is acceptable except a minor comment. Actually *Dactylellina* is trapping fungus and can capture secondary-stage juveniles and *Clonostachys*, *Pochonia* and *Purpureocillium* can parasitize on nematode eggs. Those fungi associated with no-leaf individuals of soybean, that means high nematode densities in no-leaf individuals can stimulate the multiply of those fungi. Authors may discuss this point a little bit.

**Decision letter (RSOS-181693.R1)**

07-Feb-2019

Dear Dr Toju:

On behalf of the Editors, I am pleased to inform you that your Manuscript RSOS-181693.R1 entitled "Consortia of anti-nematode fungi and bacteria in the rhizosphere of soybean plants attacked by root-knot nematodes" has been accepted for publication in Royal Society Open Science subject to minor revision in accordance with the referee suggestions. Please find the referees' comments at the end of this email.

The reviewers and Subject Editor have recommended publication, but also suggest some minor revisions to your manuscript. Therefore, I invite you to respond to the comments and revise your manuscript.

- Ethics statement

If your study uses humans or animals please include details of the ethical approval received, including the name of the committee that granted approval. For human studies please also detail whether informed consent was obtained. For field studies on animals please include details of all permissions, licences and/or approvals granted to carry out the fieldwork.

- Data accessibility

It is a condition of publication that all supporting data are made available either as supplementary information or preferably in a suitable permanent repository. The data accessibility section should state where the article's supporting data can be accessed. This section should also include details, where possible of where to access other relevant research materials such as statistical tools, protocols, software etc can be accessed. If the data has been deposited in



an external repository this section should list the database, accession number and link to the DOI for all data from the article that has been made publicly available. Data sets that have been deposited in an external repository and have a DOI should also be appropriately cited in the manuscript and included in the reference list.

If you wish to submit your supporting data or code to Dryad (<http://datadryad.org/>), or modify your current submission to dryad, please use the following link:

<http://datadryad.org/submit?journalID=RSOS&manu=RSOS-181693.R1>

- **Competing interests**

Please declare any financial or non-financial competing interests, or state that you have no competing interests.

- **Authors' contributions**

All submissions, other than those with a single author, must include an Authors' Contributions section which individually lists the specific contribution of each author. The list of Authors should meet all of the following criteria; 1) substantial contributions to conception and design, or acquisition of data, or analysis and interpretation of data; 2) drafting the article or revising it critically for important intellectual content; and 3) final approval of the version to be published.

All contributors who do not meet all of these criteria should be included in the acknowledgements.

We suggest the following format:

AB carried out the molecular lab work, participated in data analysis, carried out sequence alignments, participated in the design of the study and drafted the manuscript; CD carried out the statistical analyses; EF collected field data; GH conceived of the study, designed the study, coordinated the study and helped draft the manuscript. All authors gave final approval for publication.

- **Acknowledgements**

Please acknowledge anyone who contributed to the study but did not meet the authorship criteria.

- **Funding statement**

Please list the source of funding for each author.

Please note that we cannot publish your manuscript without these end statements included. We have included a screenshot example of the end statements for reference. If you feel that a given heading is not relevant to your paper, please nevertheless include the heading and explicitly state that it is not relevant to your work.

Because the schedule for publication is very tight, it is a condition of publication that you submit the revised version of your manuscript before 16-Feb-2019. Please note that the revision deadline will expire at 00.00am on this date. If you do not think you will be able to meet this date please let me know immediately.

To revise your manuscript, log into <https://mc.manuscriptcentral.com/rsos> and enter your Author Centre, where you will find your manuscript title listed under "Manuscripts with Decisions". Under "Actions," click on "Create a Revision." You will be unable to make your revisions on the originally submitted version of the manuscript. Instead, revise your manuscript and upload a new version through your Author Centre.

When submitting your revised manuscript, you will be able to respond to the comments made by the referees and upload a file "Response to Referees" in "Section 6 - File Upload". You can use this to document any changes you make to the original manuscript. In order to expedite the processing of the revised manuscript, please be as specific as possible in your response to the referees.

When uploading your revised files please make sure that you have:

- 1) A text file of the manuscript (tex, txt, rtf, docx or doc), references, tables (including captions) and figure captions. Do not upload a PDF as your "Main Document".
- 2) A separate electronic file of each figure (EPS or print-quality PDF preferred (either format should be produced directly from original creation package), or original software format)
- 3) Included a 100 word media summary of your paper when requested at submission. Please ensure you have entered correct contact details (email, institution and telephone) in your user account
- 4) Included the raw data to support the claims made in your paper. You can either include your data as electronic supplementary material or upload to a repository and include the relevant doi within your manuscript
- 5) All supplementary materials accompanying an accepted article will be treated as in their final form. Note that the Royal Society will neither edit nor typeset supplementary material and it will be hosted as provided. Please ensure that the supplementary material includes the paper details where possible (authors, article title, journal name).

Supplementary files will be published alongside the paper on the journal website and posted on the online figshare repository (<https://figshare.com>). The heading and legend provided for each supplementary file during the submission process will be used to create the figshare page, so please ensure these are accurate and informative so that your files can be found in searches. Files on figshare will be made available approximately one week before the accompanying article so that the supplementary material can be attributed a unique DOI.

Once again, thank you for submitting your manuscript to Royal Society Open Science and I look forward to receiving your revision. If you have any questions at all, please do not hesitate to get in touch.

Kind regards,  
Royal Society Open Science Editorial Office  
Royal Society Open Science  
[openscience@royalsociety.org](mailto:openscience@royalsociety.org)

on behalf of Dr Berat Haznedaroglu (Associate Editor) and Professor Kevin Padian (Subject Editor)  
[openscience@royalsociety.org](mailto:openscience@royalsociety.org)

Reviewer comments to Author:  
Reviewer: 2

Comments to the Author(s)

The manuscript is acceptable except a minor comment. Actually *Dactylellina* is trapping fungus and can capture secondary-stage juveniles and *Clonostachys*, *Pochonia* and *Purpureocillium* can parasitize on nematode eggs. Those fungi associated with no-leaf individuals of soybean, that

means high nematode densities in no-leaf individuals can stimulate the multiply of those fungi. Authors may discuss this point a little bit.

## Author's Response to Decision Letter for (RSOS-181693.R1)

See Appendix C.

## Decision letter (RSOS-181693.R2)

21-Feb-2019

Dear Dr Toju,

I am pleased to inform you that your manuscript entitled "Consortia of anti-nematode fungi and bacteria in the rhizosphere of soybean plants attacked by root-knot nematodes" is now accepted for publication in Royal Society Open Science.

You can expect to receive a proof of your article in the near future. Please contact the editorial office ([openscience\\_proofs@royalsociety.org](mailto:openscience_proofs@royalsociety.org) and [openscience@royalsociety.org](mailto:openscience@royalsociety.org)) to let us know if you are likely to be away from e-mail contact. Due to rapid publication and an extremely tight schedule, if comments are not received, your paper may experience a delay in publication.

Royal Society Open Science operates under a continuous publication model (<http://bit.ly/cpFAQ>). Your article will be published straight into the next open issue and this will be the final version of the paper. As such, it can be cited immediately by other researchers. As the issue version of your paper will be the only version to be published I would advise you to check your proofs thoroughly as changes cannot be made once the paper is published.

On behalf of the Editors of Royal Society Open Science, we look forward to your continued contributions to the Journal.

Kind regards,  
Royal Society Open Science Editorial Office  
Royal Society Open Science  
[openscience@royalsociety.org](mailto:openscience@royalsociety.org)

on behalf of Dr Berat Haznedaroglu (Associate Editor) and Professor Kevin Padian (Subject Editor)  
[openscience@royalsociety.org](mailto:openscience@royalsociety.org)

Follow Royal Society Publishing on Twitter: @RSocPublishing  
Follow Royal Society Publishing on Facebook:  
<https://www.facebook.com/RoyalSocietyPublishing.FanPage/>  
Read Royal Society Publishing's blog: <https://blogs.royalsociety.org/publishing/>

## Appendix A

Review for RSOS root-knot nematode paper

Formatting concerns.

- 1) Figure and Table notations should be consistent throughout – I would suggest Bold, written out. For supplementary data/figures, these can just be labeled “Figure Sx” rather than redundantly labeling them “electronic supplementary material, Figure Sx”
- 2) The sections labeled Ethics, Data Accessibility, etc. These should be bolded
- 3) Tables should be rotated so the text can be big enough to read. Tables 2-4. Alternatively just use the most specific classification for the identified OTU (perhaps labeled with (P/O/F/C/G to clarify), to make the table easier to read. Also separate tables for Green and No Leaf associated OTUs would be clearer
- 4) The primers used for sequencing and amplification should be put in a Table, and the Tables in the paper should be renumbered.

Writing concerns.

The writing is generally clear, but there are a few bad habits that make for difficult reading. The most pervasive is the use of words like “However”, “Overall”, and “Therefore” to start sentences. In most cases these words can be removed without changing the meaning of the text. There are also several instances of run on sentences using several commas to delineate clauses that could be broken up into separate sentences. This is largely in the Summary, Introduction, and to a lesser extent in the discussion. Almost everywhere in the text where a sentence starts with a short clause followed by a comma, this clause can be removed or placed at the end of the sentence to make the writing clearer.

A specific concern in the discussion is that the preference analysis used to suggest that certain microbes are preferentially found on the roots of the diseased plants, but no quantitative data is provided (in other words, how much more prevalent is *Pseudomonas* in the “no leaf” rhizosphere?). Similar analysis on each of the OTUs found to have a preference could shed additional light on the magnitude of the effect of disease.

The discussion is pretty good, but a little long. The network analysis is discussed a lot, and I think lengthy discussion of the nematocidal properties of various organisms can be cut, considering that you don’t know if these specific organisms are present (only organisms in the same genus).

## Appendix B

1 Consortia of anti-nematode fungi and bacteria in the  
2 rhizosphere of soybean plants attacked by root-knot  
3 nematodes

4

5 Hirokazu Toju<sup>1,2</sup> and Yu Tanaka<sup>2,3</sup>

6

7 <sup>1</sup>Center for Ecological Research, Kyoto University, Otsu, Shiga 520-2133, Japan

8 <sup>2</sup>Precursory Research for Embryonic Science and Technology (PRESTO), Japan Science and  
9 Technology Agency, Kawaguchi, Saitama 332-0012, Japan

10 <sup>3</sup>Graduate School of Agriculture, Kyoto University, Kitashirakawa-oiwake-cho, Sakyo,  
11 Kyoto, 606-8502, Japan

12

13 This article includes 5 figures, 4 tables, 5 supplementary figures, and 5 supplementary data.

14

15 **Keywords:** disease suppressive soil; *Glycine max*; *Meloidogyne*; nematophagous fungi;  
16 phytopathogenic pathogens and pests; sustainable agriculture

17

18 **Author for correspondence:** Hirokazu Toju (toju.hirokazu.4c@kyoto-u.ac.jp).

19

20 bioRxiv accession: <https://doi.org/10.1101/332403>

21

22 **Summary.**

23 Cyst and root-knot nematodes are major risk factors of agroecosystem management, often  
24 causing devastating impacts on crop production. The use of microbes that parasitize or prey  
25 on nematodes has been considered as a promising approach for suppressing phytopathogenic  
26 nematode populations. However, ~~as~~ effects and persistence of those biological control agents  
27 often vary substantially depending on regions, soil characteristics, and agricultural practices; ~~;~~  
28 ~~more~~ ore insights into microbial community processes are required to develop reproducible  
29 control of nematode populations. By performing high-throughput sequencing profiling of  
30 bacteria and fungi, we examined how root and soil microbiomes differ between benign and  
31 nematode-infected plant individuals in a soybean field in Japan. Results indicated that various  
32 taxonomic groups of bacteria and fungi occurred preferentially on the soybean individuals  
33 infected by root-knot nematodes or those uninfected by nematodes. Based on a network  
34 analysis of potential microbe–microbe associations, we further found that several fungal taxa  
35 potentially preying on nematodes [*Dactylellina* (Orbiliiales), *Rhizophydium* (Rhizophydiales),  
36 *Clonostachys* (Hypocreales), *Pochonia* (Hypocreales), and *Purpureocillium* (Hypocreales)]  
37 co-occurred in the soybean rhizosphere at a small spatial scale. ~~Overall,~~ ~~†~~ This study suggests  
38 how “consortia” of anti-nematode microbes can derive from indigenous (resident)  
39 microbiomes, ~~thereby~~ providing basic information for managing anti-nematode microbial  
40 communities in agroecosystems.

41

42

## 43 1. Introduction

44 Plant pathogenic nematodes, such as cyst and root-knot nematodes, are major threats to crop  
45 production worldwide [1, 2]. Soybean fields, in particular, are often damaged by such  
46 phytopathogenic nematodes, resulting in substantial yield loss [3, 4]. A number of chemical  
47 nematicides and biological control agents (e.g., nematophagous fungi in the genera  
48 *Purpureocillium* and *Clonostachys*) have been used to suppress nematode populations in  
49 farmlands [5, 6]. However, once cyst and root-knot nematodes appear in a farmland, they  
50 often persist in the soil for a long time [7], causing high financial costs in agricultural  
51 management. ~~Therefore,~~ ~~F~~inding ways to suppress pathogenic nematode populations in  
52 agroecosystems is a key to reducing risk and management costs in production of soybean and  
53 other crop plants.

54 To reduce damage by cyst and root-knot nematodes, a number of studies have evaluated  
55 effects of crop varieties/species, crop rotations, fertilizer inputs, and tillage intensity on  
56 nematode density in farmland soil [1, 8-10]. However, the results of those studies varied  
57 considerably depending on regions, soil characteristics, and complicated interactions among  
58 multiple factors (e.g., interactions between organic matter inputs and tillage frequency) [11].  
59 ~~Therefore~~ ~~Thus~~, it remains an important challenge to understand the mechanisms by which  
60 phytopathogenic nematode populations are suppressed in some farmland soils but not in  
61 others [12]. New lines of information are required for building general schemes for making  
62 agroecosystems robust to the emergence of pest nematodes.

63 Based on the technological advances in high-throughput DNA sequencing, more and  
64 more studies have examined structures of microbial communities (microbiomes) in order to  
65 evaluate biotic environmental conditions in the endosphere and rhizosphere of plants [13-16].  
66 ~~Indeed,~~ ~~R~~ecent studies have uncovered microbiome compositions of “disease suppressive  
67 soils”, in which pests and pathogens damaging crop plants have been suppressed for long  
68 periods of time [17-19]. Some studies have further discussed how some microbes within such  
69 disease-suppressive microbiomes contribute to health and growth of crop plant species [17,  
70 20, 21]. In one of the studies, soil microbiome compositions were compared among soybean

71 fields that differed in the density of cyst nematodes [12]. The study then revealed that bacteria  
72 and fungi potentially having negative impacts on nematode populations (e.g., *Purpureocillium*  
73 and *Pochonia*) were more abundant in long-term than in short-term monoculture fields of  
74 soybeans [12]. ~~While s~~Such among-farmland comparisons have provided invaluable insights  
75 into ecosystem functions of indigenous (native) microbiomes. Nonetheless, potential  
76 relationship between cropping system management and community processes of anti-  
77 nematode microbes remains obscured because the farmlands compared in those studies could  
78 vary in climatic and edaphic factors, ~~obscuring potential relationship between cropping~~  
79 ~~system management and community processes of anti nematode microbes~~. Moreover, because  
80 incidence of cyst and root-knot nematodes generally varies at small spatial scales [22], there  
81 can be spatial heterogeneity in abundance and community compositions of anti-nematode  
82 bacteria and fungi within a farmland. ~~Thus, s~~Studies focusing on fine-scale assembly of anti-  
83 nematode microbes ~~are are required~~awaited for developing agroecosystem management  
84 protocols for controlling phytopathogenic nematodes.

85 We herein conducted ~~By~~ an Illumina sequencing analysis of bacteria and fungi in a  
86 soybean (*Glycine max*) field, ~~we and then~~ examined how root and rhizosphere microbiome  
87 structures varied among host plant individuals that differed in damage by root-knot nematodes  
88 (*Meloidogyne* sp.). Based on the data of microbiomes at a small spatial scale, we statistically  
89 explored microbial species/taxa that occurred preferentially in the roots or rhizosphere soil of  
90 nematode-infected soybean individuals. We further investigated the structure of networks  
91 depicting co-abundance patterns of microbial species/taxa within the soybean field, thereby  
92 examining whether multiple anti-nematode bacteria and fungi form consortia (assemblages)  
93 on/around the plant individuals infected by root-knot nematodes. ~~Overall, this study~~Our  
94 results suggests that various taxonomic groups of anti-nematode bacteria and fungi are present  
95 within indigenous microbiomes. ~~Our results~~This study also suggests that microbiome  
96 assembly at fine spatial scales is a key to manage populations and communities of such  
97 functional microbes.

98



## 99 2. Methods

### 100 2.1. Sampling

101 Fieldwork was conducted at the soybean field on the Hokubu Campus of Kyoto University,  
102 Japan (35.033 °N, 135.784 °E). In the field, the soybean strain “Sachiyutaka” was sown at 15  
103 cm intervals in two lines (electric supplementary material, figure S1) on July 4, 2016 [basal  
104 fertilizer, N:P<sub>2</sub>O<sub>5</sub>:K<sub>2</sub>O = 3:10:10 g/m<sup>2</sup>]. In the lines, 69 and 62 individuals (“set 1” and “set  
105 2”, respectively), respectively, were sampled every other position\* (i.e., 30 cm intervals)  
106 (~~Fig-figure- 1~~) on October 7, 2016. The sampled soybean individuals were classified into three  
107 categories: normal individuals with green leaves (“green”), individuals with yellow leaves  
108 (“yellow”), and those with no leaves (“no leaf”) (~~Fig-figure 1A-Ca-c~~). Among them, “green”  
109 individuals exhibited normal growth, while “no leaf” individuals were heavily infected by  
110 root-knot nematodes: “yellow” individuals showed intermediate characters. In total, 97  
111 “green”, 19 “yellow”, and 15 “no leaf” individuals were sampled (~~Fig-figure 1D1d~~).

Formatted: Font: Italic

Formatted: Font: Italic

112 For each individual, two segments of 5-cm terminal roots and rhizosphere soil were  
113 collected from ca. 10-cm below the soil surface. The root and soil samples were transferred  
114 into a cool box in the field and then stored at -80°C until DNA extraction in the laboratory.  
115 The ~~whole above-ground bodies~~ ~~bodies~~ of the individuals were placed in drying ovens at 80  
116 °C for 72 hours to measure dry mass. The dry mass data indicated that “green”, “yellow”, and  
117 “no leaf” soybean individuals significantly differed in their biomass (~~Fig-figure 1C1c~~).

Formatted: Font: Italic

118

### 119 2.2. DNA extraction, PCR, and sequencing

120 The root segments of each individual were transferred to a 15 mL tube and washed in 70%  
121 ethanol by vortexing for 10 s. The samples were then transferred to a new 15 mL tube and  
122 then washed again in 70% ethanol by sonication (42 Hz) for 5 min. After an additional  
123 sonication wash in a new tube, one of the two root segments were dried and placed in a 1.2  
124 mL tube for each soybean individual. DNA extraction was then performed with a  
125 cetyltrimethylammonium bromide (CTAB) method [23] after pulverizing the roots with 4 mm

126 zirconium balls at 25 Hz for 3 min using a TissueLyser II (Qiagen).

127 For DNA extraction from the rhizosphere soil, the ISOIL for Beads Beating kit (Nippon  
128 Gene) was used as instructed by the manufacturer. For each sample, 0.5 g of soil was placed  
129 into a 2 mL microtubes of the ISOIL kit. To increase the yield of DNA, 10 mg of skim milk  
130 powder (Wako, 198-10605) was added to each sample [24].

131 For each of the root and soil samples, the 16S rRNA V4 region of the prokaryotes and the  
132 internal transcribed spacer 1 (ITS1) region of fungi were amplified. The PCR of the 16S  
133 rRNA region was performed with the forward primer 515f [25] fused with 3–6-mer Ns for  
134 improved Illumina sequencing quality [26] and the forward Illumina sequencing primer (5'-  
135 TCG TCG GCA GCG TCA GAT GTG TAT AAG AGA CAG- [3–6-mer Ns] - [515f] -3') and  
136 the reverse primer 806rB [27] fused with 3–6-mer Ns and the reverse sequencing primer (5'-  
137 GTC TCG TGG GCT CGG AGA TGT GTA TAA GAG ACA G [3–6-mer Ns] - [806rB] -3')  
138 (0.2  $\mu$ M each). To prevent the amplification of mitochondrial and chloroplast 16S rRNA  
139 sequences, specific peptide nucleic acids (mPNA and pPNA; ~~Lundberg, Yourstone [26]~~  
140 [Lundberg, Yourstone \[26\]](#)) (0.25  $\mu$ M each) were added to the reaction mix of KOD FX Neo  
141 (Toyobo). The temperature profile of the PCR was 94 °C for 2 min, followed by 35 cycles at  
142 98 °C for 10 s, 78 °C for 10 s, 50 °C for 30 s, 68 °C for 50 s, and a final extension at 68 °C for  
143 5 min. To prevent generation of chimeric sequences, the ramp rate through the thermal cycles  
144 was set to 1 °C/sec [28]. Illumina sequencing adaptors were then added to respective samples  
145 in the supplemental PCR using the forward fusion primers consisting of the P5 Illumina  
146 adaptor, 8-mer indexes for sample identification [29] and a partial sequence of the sequencing  
147 primer (5'- AAT GAT ACG GCG ACC ACC GAG ATC TAC AC - [8-mer index] - TCG TCG  
148 GCA GCG TC -3') and the reverse fusion primers consisting of the P7 adaptor, 8-mer  
149 indexes, and a partial sequence of the sequencing primer (5'- CAA GCA GAA GAC GGC  
150 ATA CGA GAT - [8-mer index] - GTC TCG TGG GCT CGG -3'). KOD FX Neo was used  
151 with a temperature profile of 94 °C for 2 min, followed by 8 cycles at 98 °C for 10 s, 55 °C for  
152 30 s, 68 °C for 50 s (ramp rate = 1 °C/s), and a final extension at 68 °C for 5 min. The PCR  
153 amplicons of the 131 soybean individuals were then pooled after a purification/equalization  
154 process with the AMPureXP Kit (Beckman Coulter). Primer dimers, which were shorter than

155 200 bp, were removed from the pooled library by supplemental purification with AMPureXP:  
156 the ratio of AMPureXP reagent to the pooled library was set to 0.6 (v/v) in this process.

157 The PCR of fungal ITS1 region was performed with the forward primer ITS1F\_KYO1  
158 [30] fused with 3–6-mer Ns for improved Illumina sequencing quality [26] and the forward  
159 Illumina sequencing primer (5'- TCG TCG GCA GCG TCA GAT GTG TAT AAG AGA  
160 CAG- [3–6-mer Ns] – [ITS1F\_KYO1] -3') and the reverse primer ITS2\_KYO2 [30] fused  
161 with 3–6-mer Ns and the reverse sequencing primer (5'- GTC TCG TGG GCT CGG AGA  
162 TGT GTA TAA GAG ACA G [3–6-mer Ns] - [ITS2\_KYO2] -3'). The buffer and polymerase  
163 system of KOD FX Neo was used with a temperature profile of 94 °C for 2 min, followed by  
164 35 cycles at 98 °C for 10 s, 50 °C for 30 s, 68 °C for 50 s, and a final extension at 68 °C for 5  
165 min. Illumina sequencing adaptors and 8-mer index sequences were then added in the second  
166 PCR as described above. The amplicons were purified and pooled as described above.

167 The sequencing libraries of the prokaryote 16S and fungal ITS regions were processed in  
168 an Illumina MiSeq sequencer (run center: KYOTO-HE; 15% PhiX spike-in). Because the  
169 quality of forward sequences is generally higher than that of reverse sequences in Illumina  
170 sequencing, we optimized the MiSeq run setting in order to use only forward sequences.  
171 Specifically, the run length was set 271 forward (R1) and 31 reverse (R4) cycles in order to  
172 enhance forward sequencing data: the reverse sequences were used only for discriminating  
173 between 16S and ITS1 sequences based on the sequences of primer positions.

174

### 175 **2.3. Bioinformatics**

176 The raw sequencing data were converted into FASTQ files using the program bcl2fastq 1.8.4  
177 distributed by Illumina. The output FASTQ files were demultiplexed with the program  
178 Claident v0.2.2017.05.22 [31, 32], by which sequencing reads whose 8-mer index positions  
179 included nucleotides with low (< 30) quality scores were removed. The sequencing data were  
180 deposited to DNA Data Bank of Japan (DDBJ) (DRA006845). Only forward sequences were  
181 used in the following analyses after removing low-quality 3'-ends using Claident. Noisy reads  
182 [31] were subsequently discarded and then denoised dataset consisting of 2,041,573 16S and

183 1,325,199 ITS1 reads were obtained.

184 For each dataset of 16S and ITS1 regions, filtered reads were clustered with a cut-off  
185 sequencing similarity of 97% using the program VSEARCH [33] as implemented in Claident.  
186 The operational taxonomic units (OTUs) representing less than 10 sequencing reads were  
187 subsequently discarded. The molecular identification of the remaining OTUs was performed  
188 based on the combination of the query-centric auto-*k*-nearest neighbor (QCauto) method [32]  
189 and the lowest common ancestor (LCA) algorithm [34] as implemented in Claident. Note that  
190 taxonomic identification results based on the combination of the QCauto search and the LCA  
191 taxonomic assignment are comparable to, or sometimes more accurate than, those with the  
192 alternative approaches [32, 35, 36]. In total, 5,351 prokaryote (bacterial or archaeal) OTUs  
193 and 1,039 fungal OTUs were obtained for the 16S and ITS1 regions, respectively (electric  
194 supplementary material, data S1). The UNIX codes used in the above bioinformatic pipeline  
195 are available as electric supplementary material, data S2.

196 For each combination of target region (16S or ITS1) and sample type (root or soil), we  
197 obtained a sample  $\times$  OTU matrix, in which a cell entry depicted the number of sequencing  
198 reads of an OTU in a sample (electric supplementary material, data S3). The cell entries  
199 whose read counts represented less than 0.1% of the total read count of each sample were  
200 removed to minimize effects of PCR/sequencing errors [37]. The filtered matrix was then  
201 rarefied to 1,000 reads per sample using the “rrarefy” function of the vegan 2.4-1 package  
202 [38] of R 3.4.3 [39]. Samples with less than 1,000 reads were discarded in this process: the  
203 numbers of samples in the rarefied sample  $\times$  OTU matrices were 119, 128, 117, and 128 for  
204 root prokaryote, root fungal, soil prokaryote, and soil fungal matrices, respectively (electric  
205 supplementary material, data S4).

206

#### 207 **2.4. Prokaryote and fungal community structure**

208 Relationship between the number of sequencing reads and that of detected OTUs was  
209 examined for each dataset (root prokaryote, root fungal, soil prokaryote, or soil fungal  
210 dataset) with the “rarecurve” function of the R vegan package. Likewise, relationship between

211 the number of samples and that of OTUs was examined with the vegan “specaccum” function.  
212 For each dataset, difference in OTU compositions among “green”, “yellow”, and “no leaf”  
213 soybean individuals was examined by the permutational analysis of variance (PERMANOVA;  
214 Anderson [40]) with the vegan “adonis” function (10,000 permutations). To control effects of  
215 sampling positions (lines) on the community structure, the information of sampling sets (set 1  
216 or set 2) was included as an explanatory variable in the PERMANOVA. The variation in OTU  
217 compositions was visualized with nonmetric multidimensional scaling (NMDS) using the  
218 vegan “metaMDS” function. To examine potential relationship between root/soil microbial  
219 community structure and plant biomass, an additional PERMANOVA was performed for each  
220 dataset. The information of sampling sets was included in the models. To explore signs of  
221 spatial autocorrelation in the community data, a Mantel’s correlogram analysis was performed  
222 with the vegan “mantel.correlog” function. The “Bray-Curtis” metric of  $\beta$ -diversity was used  
223 in the PERMANOVA, NMDS, and Mantel’s correlogram analyses.

224

## 225 2.5. Screening of host-state-specific OTUs

226 To explore prokaryote/fungal OTUs that preferentially occurred on/around “green”, “yellow”,  
227 or “no leaf” soybean individuals, a randomization test was performed by shuffling the plant  
228 state labels in each of the root prokaryote, root fungal, soil prokaryote, and soil fungal data  
229 matrices (100,000 permutations). We then evaluated preference of a prokaryote/fungal OTU  
230 ( $i$ ) for a plant state ( $j$ ) (“green”, “yellow”, or “no leaf”) as follows:

$$231 \quad \textit{Preference}(i, j) = [N_{\text{observed}}(i, j) - \text{Mean}(N_{\text{randomized}}(i, j))] / \text{SD}(N_{\text{randomized}}(i, j)),$$

232 where  $N_{\text{observed}}(i, j)$  denoted the mean number of the sequencing reads of OTU  $i$  among state  $j$   
233 soybean samples in the original data, and the  $\text{Mean}(N_{\text{randomized}}(i, j))$  and  $\text{SD}(N_{\text{randomized}}(i, j))$   
234 were the mean and standard deviation of the number of sequencing reads for the focal OTU–  
235 plant state combination across randomized matrices. Regarding this standardized preference  
236 index, values larger than three generally represent strong preferences (false discovery rate  
237 (FDR) < 0.05; [see results of a previous study](#) [35]): hence, we listed OTUs whose preference  
238 values exceeded three.

239

## 240 **2.6. Microbe–microbe networks**

241 To examine how prokaryote and fungal OTUs co-occurred in root or soil samples, a co-  
242 abundance network analysis was performed based on the sparse inverse covariance estimation  
243 for ecological association inference (Spiec-Easi) method [41]. In each of the root and soil  
244 sample analyses, the input data matrix was prepared by merging the sample  $\times$  OTU matrices  
245 of prokaryotes and fungi. As inferences of co-abundance patterns were unavailable for rare  
246 OTUs, only the OTUs detected from 30 or more samples were retained in the input matrices.  
247 For each of the root and soil data matrices, a co-abundance analysis was performed with the  
248 “spiec.easi” function of the R “SpiecEasi” package [41]. The networks depicting the co-  
249 abundance patterns were drawn using the R “igraph” package [42].

250

## 251 **3. Results**

### 252 **3.1. Prokaryotes and fungal community structure**

253 On average, 107.9 (SD = 18.0), 25.4 (SD = 8.9), 172.5 (SD = 17.3), and 78.3 (SD = 10.5)  
254 OTUs per sample were observed, respectively, from the root prokaryote, root fungal, soil  
255 prokaryote, and soil fungal dataset after filtering and rarefaction steps (electric supplementary  
256 material, figure S2). The total number of OTUs observed was 1387, 346, 1191, and 769 for  
257 the root prokaryote, root fungal, soil prokaryote, and soil fungal datasets, respectively  
258 (electric supplementary material, figure S3).

259 In the soybean field, the prokaryote community on roots was dominated by the bacterial  
260 classes Proteobacteria, Actinobacteria, Chloroflexi, and Bacteroidetes, while that of  
261 rhizosphere soil consisted mainly of Proteobacteria, Actinobacteria, and Acidobacteria, and  
262 the archaeal lineage Thaumarchaeota (*Fig-figure 2A2a*). The fungal community of roots was  
263 dominated by the fungal orders Hypocreales, Sordariales, Pleosporales, while that of soil  
264 consisted mainly of Hypocreales, Agaricales, Eurotiales, Mortierellales, and Filobasidiales  
265 (*Fig-figure 2B2b*). Regarding the order level compositions of fungi in the rhizosphere soil, the

Formatted: Font: Italic

Formatted: Font: Italic

266 proportion of Orbiliales reads was much higher in “yellow” (3.62 %) and “no leaf” (4.82 %)  
267 soybean individuals than in “green” ones (0.89 %) ([Fig-figure 2](#)). [The genus level](#)  
268 [compositions of the samples are shown in electric supplementary material, figure S4.](#)

269 In each dataset (i.e., root prokaryote, root fungal, soil prokaryote, or soil fungal data),  
270 microbial community structure varied among “green”, “yellow”, or “no leaf” soybean  
271 individuals, although the effects of sampling sets on the community structure were much  
272 stronger ([Fig-figure 3](#)). Even within each sampling set, spatial autocorrelations of  
273 bacterial/fungal community structure were observed (electric supplementary material, [figure](#)  
274 [S4figure S5](#)). Significant relationships between microbial community structure and soybean  
275 biomass were observed in the soil prokaryote and soil fungal datasets but not in the root  
276 prokaryote and root fungal datasets ([Table-table 1](#)).

277

### 278 3.2. Screening of host-state-specific OTUs

279 In the root microbiome, only an unidentified fungal OTU showed a strong preference for  
280 “green” soybean individuals, while 18 bacterial and 4 fungal OTUs occurred preferentially on  
281 “no leaf” host individuals ([Table-table 2](#); electric supplementary material, [figure S5figure S6](#)).  
282 The list of the bacteria showing preferences for “no leaf” soybean individuals included OTUs  
283 whose 16S rRNA sequences were allied to those of *Dyella*, *Herbaspirillum*, *Labrys*,  
284 *Phenylobacterium*, *Gemmata*, *Chitinophaga*, *Pedobacter*, *Niastella*, and *Streptomyces* ([Table-](#)  
285 [table 2](#)). The four fungal OTUs showing preferences for “no leaf” hosts were unidentified  
286 basidiomycetes ([Table-table 2](#)).

287 In the rhizosphere soil microbiome, seven prokaryote OTUs, including those belonging to  
288 Chloroflexi (e.g., *Sphaerobacteraceae* sp.) and Proteobacteria (*Kofleriaceae* sp.), occurred  
289 preferentially on “green” host individuals ([Table-table 3](#)). Likewise, five fungal OTUs,  
290 including those allied to basidiomycete yeasts in the genera *Solicoccozyma* and *Saitozyma*,  
291 showed preferences for “green” soybean individuals ([Table-table 3](#)). Results also revealed that  
292 26 bacterial and 11 fungal OTUs had biased distributions in the rhizosphere of “no leaf”  
293 soybean individuals ([Table-table 3](#)). The list of microbes showing preferences for “no leaf”

294 hosts included OTUs allied to bacteria in the genera *Pseudomonas*, *Nevskia*, *Cellvibrio*,  
295 *Massilia*, *Duganella*, *Novosphingobium*, *Mucilaginibacter*, and *Flavobacterium* and OTUs  
296 allied to fungi in the genera *Burgoa*, *Clonostachys*, *Plectosphaerella*, *Xylaria*, *Dactylellina*,  
297 *Talaromyces*, *Cladosporium*, *Alternaria*, and *Peniophora* (Table-table 3). The list of microbes  
298 that preferentially occurred on “no leaf” hosts involved OTUs with high sequence similarity  
299 to the nematophagous fungi, *Clonostachys rosea* (Hypocreales) and *Dactylellina* sp.  
300 (Orbiliiales) (Table-table 3). The reads of the *Clonostachys* (F\_0257) and *Dactylellina*  
301 (F\_0163) OTUs, respectively, represented 9.5% and 3.5% of the sequencing reads of “no  
302 leaf” samples (electric supplementary material, data S5). The indices of preferences for  
303 “yellow” soybean individuals are shown in electric supplementary material, data S5.

304

### 305 3.3. Microbe–microbe networks

306 The structure of microbe–microbe networks (Fig-figure 4) were more complicated in the soil  
307 microbiome data (Fig-figure 4C-Dc-d) than in the root microbiome data (Fig-figure 4A-Ba-b).  
308 Within the network representing co-abundance of microbes across root samples, the  
309 *Clonostachys* OTU (F\_0257) had a significant link with a *Streptomyces* OTU, while  
310 *Dactylellina* was absent from the root microbiome network data (Fig-figure 4A4a). Within the  
311 positive co-abundance network of the rhizosphere soil microbiome (Fig-figure 4C4c), the  
312 *Clonostachys* (F\_0257) and *Dactylellina* (F\_0163) nematophagous fungal OTUs were  
313 connected with each other (Table-table 4). In addition, the *Clonostachys* OTU was linked with  
314 two bacterial OTUs (*Ralstonia* and Rhizobiales) and fungal OTUs in the genera *Calonectria*  
315 and *Purpureocillium* (Table-table 4). Likewise, the *Dactylellina* OTU was connected also with  
316 two Alphaproteobacterial OTUs and a bacterial OTU allied to *Nitrospira japonica* as well as  
317 fungal OTUs in the genera *Rhizophydium*, *Pochonia*, *Purpureocillium* (Table-table 4).

318

## 319 4. Discussion

320 Based on Illumina sequencing, we herein compared root-associated/rhizosphere microbial

Formatted: Font: Italic

Formatted: Font: Italic

Formatted: Font: Italic

Formatted: Font: Italic



321 communities between soybean individuals infected by root-knot nematodes and those  
322 showing no symptoms. The results indicated that, in both soybean roots and rhizosphere soil,  
323 prokaryote and fungal community structures significantly varied depending on host plant  
324 states (~~Figs-figures~~ 2 and 3). We further performed statistical analyses for screening  
325 prokaryote and fungal OTUs preferentially associated with infected and benign soybean host  
326 individuals (~~Tables-tables~~ 2-3; ~~Fig-figure~~ 4). The results are based on purely descriptive data  
327 and hence they, in principle, are not direct evidences of interactions among plants, nematodes,  
328 and microbiomes-; i.e., causal relationship among those agents remains unknown.  
329 ~~Moreover,~~ as this study provided only “snap-shot” information of microbiome structure at  
330 the end of a growing season, we need to conduct further studies uncovering temporal  
331 microbiome dynamics throughout the growing season of soybeans ~~are-awaited~~. Nonetheless,  
332 as detailed below, the statistical analyses suggest assembly of diverse anti-nematode bacteria  
333 and fungi from indigenous microbial communities in the soybean field, providing a basis for  
334 exploring ways to reduce damage by root-knot nematodes with those indigenous functional  
335 microbes.

336 Within the root microbiome analyzed, various taxonomic groups of bacteria preferentially  
337 occurred on “no leaf” soybean samples (~~Table-table~~ 2). Among them, the genus *Streptomyces*  
338 is known to involve some species that suppress nematode populations, potentially used as  
339 biological control agents for root-knot nematodes [43-46]. In contrast, *Herbaspirillum*,  
340 *Rickettsia*, *Chitinophaga*, and *Pedobacter* have been reported as symbionts of nematodes,  
341 potentially playing beneficial roles for host nematodes [47-49]. ~~Thus,~~ Results of these  
342 statistical analyses should be interpreted with caution, as they are likely to highlight not only  
343 prospective microbes potentially parasitizing on pests/pathogens but also microbes that can  
344 form mutualistic interactions with disease agents.

345 Within the soybean rhizosphere soil microbiome, diverse taxonomic groups of not only  
346 bacteria but also fungi preferentially occurred around “no leaf” soybean individuals (~~Table-~~  
347 table 3). Among them, *Pseudomonas* has been known to suppress root-knot nematode  
348 populations [50, 51] potentially by producing hydrogen cyanide [52] or extracellular protease  
349 [53], but interactions with root-knot nematodes have not yet been examined for other bacteria

350 preferentially found in the rhizosphere of “no leaf” soybean individuals. Meanwhile, the list  
351 of the fungal OTUs frequently observed in the rhizosphere of “no leaf” soybeans included  
352 some fungi whose ability to ~~suppressing-suppress~~ nematode populations had been well  
353 documented (Table 3). *Clonostachys rosea*, for example, has been known as a prospective  
354 biological control agent of plant- and animal-pathogenic nematodes [54, 55]. An  
355 observational study based on green fluorescent protein imaging has indicated that the conidia  
356 of the fungus adhere to nematode cuticle and their germ tubes penetrate nematode bodies,  
357 eventually killing the invertebrate hosts [56]. The fungus is also known to produce a  
358 subtilisin-like extracellular protease, which plays an important role during the penetration of  
359 nematode cuticles [57]. ~~In addition to *Clonostachys*, o~~Our analysis also highlighted ~~a another~~  
360 nematophagous fungus in the genus *Dactylellina* (teleomorph = *Orbilia*). Species in the genus  
361 and many other fungi in the order Orbiliales produce characteristic trap structures with their  
362 hyphae to prey on nematodes [58-60], often nominated as prospective biological control  
363 agents [61-63].

364 An additional analysis focusing on *Clonostachys* and *Dactylellina* highlighted bacteria  
365 and fungi that frequently co-occurred with the nematophagous fungi (Fig. figure 4). In the root  
366 microbiome, *Clonostachys* and a *Streptomyces* OTU showed positively correlated  
367 distributions across soybean samples (Table table 4). In the rhizosphere microbiome,  
368 *Clonostachys* and *Dactylellina* showed significant co-abundance patterns (Table table 4).  
369 Moreover, in the soil, the two nematophagous fungi co-occurred frequently with other  
370 taxonomic groups of nematophagous fungi such as *Purpureocillium*, *Pochonia*, and  
371 *Rhizophydium* (Table table 4; Fig. figure 5). Among them, fungi in the genus *Purpureocillium*  
372 (Hypocreales: Ophiocordycipitaceae) have been known to suppress plant parasitic nematodes,  
373 insect pests, and oomycete phytopathogens [64-67] ~~and their genome sequences have been~~  
374 ~~analyzed for understanding the physiological mechanisms of the pest/pathogen suppression~~  
375 ~~[64, 68, 69]. As one of *Purpureocillium* species (*P. liacinum*) can form symbiotic interactions~~  
376 ~~with plants as endophytes [67, 70], it has been recognized as promising biological control~~  
377 ~~agents for commercial use [64].~~ Another Hypocreales genus, *Pochonia* (previously placed in  
378 the genus *Verticillium*; teleomorph = *Metacordyceps*; Clavicipitaceae) has been known as

379 nematophagous as well and they can kill eggs and females of root-knot (*Meloidogyne* spp.)  
380 and cyst (*Globodera* spp.) nematodes [68-71]. *Pochonia* fungi, especially *P. chlamydosporia*,  
381 ~~are also endophytic and hence they have been used in agriculture [75-78].~~ Species in the  
382 chytrid genus *Rhizophydium* involve species that utilize nematodes as parasites or saprophytes  
383 [72, 73]. They are known to explore host nematodes in the form of zoospores [72]. ~~Overall,~~  
384 ~~our~~ All these results suggest that indigenous anti-nematode or nematophagous microbes can  
385 form consortia in soil ecosystems of soybean fields. It is important to note that the members  
386 of the consortia do not necessarily interact with each other directly: i.e., they may merely  
387 share habitat preferences [36, 37, 74]. However, the inferred structure of microbe–microbe  
388 networks helps us understand overall consequences of ecological processes in microbiomes  
389 [15].

390 Along with the consortia of anti-nematode microbes, an OTU in the genus *Calonectria*,  
391 which causes leaf blight, wilt, and root rot of various plant species [75, 76], was frequently  
392 observed ([Table 4](#)). The phytopathogenic fungus might have attacked soybean  
393 individuals weakened by root-knot nematodes. Alternatively, *Calonectria* may have infected  
394 host soybeans earlier than root-knot nematodes, followed by the emergence of nematodes and  
395 their exploiters (i.e., anti-nematode microbes). Given that fungi can interact with each other  
396 both antagonistically and mutualistically in the soil [77, 78], direct interactions between  
397 *Calonectria* and nematophagous fungi in the genera *Clonostachys*, *Dactylellina*,  
398 *Purpureocillium*, *Pochonia*, and *Rhizophydium* are of particular interest. Studies examining  
399 potential interactions involving soybeans, root-knot nematodes, anti-nematode bacteria/fungi,  
400 and *Calonectria* will help us understand ecological processes that structure consortia of  
401 nematophagous fungi.

402 Although this study did not evaluate potential effects of background environmental  
403 conditions (e.g., soil pH and inorganic nitrogen concentration) on microbiome structure,  
404 management of edaphic conditions are expected to have great impacts on dynamics of anti-  
405 nematode microbiomes. A number of studies have explored ways to suppress nematode  
406 populations by optimizing cropping systems [1]. Crop rotation, in which planting of a crop  
407 variety and that of nematode-resistant varieties/species are rotated, has been recognized as an

408 effective technique for regulating root-knot and cyst nematode populations [8, 79, 80]. In  
409 contrast, long-term continual cropping in soybean monoculture fields can increase anti-  
410 nematode bacteria and fungi (e.g., *Pseudomonas*, *Purpureocillium*, and *Pochonia*), potentially  
411 resulting in lowered densities of cyst nematodes [12]. Tillage regimes [9-11] and introduction  
412 of organic matter (e.g., alfalfa leaves or crop residue) [81-83] have great impacts on nematode  
413 densities in farmlands, but their effects vary considerably among studies [1]. In addition,  
414 because nematode-infected plant individuals ~~infected by nematodes~~ can show highly  
415 aggregated distributions at a small spatial scale within a farmland (~~Fig-figure 1D1d~~), tillage  
416 can promote the spread of plant damaging nematodes [22]. Frequent tillage may have  
417 negative impacts on populations of nematophagous fungi as a consequence of hyphal  
418 fragmentation (cf. [84]), but such destructive effects on fungal communities have not yet been  
419 tested intensively. Given that microbiome structures were not taken into account in most  
420 previous studies evaluating effects of cropping systems on nematode suppression (but see \_  
421 [12, 21]), more insights into relationship between agroecosystem management and indigenous  
422 (native) microbiome dynamics are required for building reproducible ways ~~for developing to~~  
423 develop disease-suppressive soil.

424 We herein found that consortia of anti-nematode bacteria and fungi could develop at a  
425 small spatial scale within a field of soybeans infected by root-knot nematodes. ~~Taking into~~  
426 ~~account~~ Given the diversity of those anti-nematode microbes observed in this study, multiple  
427 biological control agents are potentially available *in situ* without introducing exogenous ones  
428 depending on base compositions and conditions of indigenous microbiomes ~~within and~~  
429 ~~around a focal farmland~~. In this respect, design of cropping systems (e.g., crop rotations,  
430 tillage frequencies, and inputs of fertilizer or organic matter) is of particular importance in  
431 activating and maximizing ecosystem functions that stem from resident microbial diversity  
432 [15]. Because those indigenous microbes, in general, have adapted to local biotic and abiotic  
433 environments, their populations are expected to persist more stably than exogenous microbes  
434 artificially introduced to a target agroecosystem (see [19] for reviews of the success/failure of  
435 microbial introduction). Elucidating relationship between cropping systems and microbiome  
436 processes is the key to design disease-suppressive agroecosystems.

Formatted: Font: Italic

437

438 **Ethics.** The fieldwork and sampling of materials were permitted by Crop Science Laboratory,  
439 Graduate School of Agriculture, Kyoto University. No ethical assessment was required prior  
440 to conducting this research. As this research does not target humans and animals, neither  
441 informed consent nor animal ethical investigations were required.

Formatted: Font: Bold

442 **Data accessibility.** Data are available from the electric supplementary material, data S1-S5  
443 and DNA Data Bank of Japan (DDBJ) (DRA006845).

Formatted: Font: Bold

444 **Authors' contributions.** H-T ~~conceived and~~ designed the work. H-T- and Y-T- performed  
445 fieldwork. H-T. conducted molecular experiment and analyzed the data. H-T- wrote the  
446 manuscript with Y-T-. All authors gave final approval for publication.

Formatted: Font: Bold

447 **Competing interests.** The authors declare no competing interests.

Formatted: Font: Bold

448 **Acknowledgements.** We thank Tatsuhiko Shiraiwa for his support in fieldwork and Mizuki  
449 Shinoda, Ko Mizushima, Sarasa Amma, and Hiroki Kawai for their support in molecular  
450 experiments. We are also grateful to Ryoji Shinya for his advice on the biology of nematodes.  
451 We are also grateful to anonymous reviewers for their productive comments.

452 **Funding.** This work was financially supported by JSPS KAKENHI Grant (15KT0032) and  
453 JST PRESTO (JPMJPR16Q6) to HT.

Formatted: Font: Bold

454 ~~**Acknowledgements.** We thank Tatsuhiko Shiraiwa for his support in fieldwork and Mizuki~~  
455 ~~Shinoda, Ko Mizushima, Sarasa Amma, and Hiroki Kawai for their support in molecular~~  
456 ~~experiments. We are also grateful to Ryoji Shinya for his advice on the biology of nematodes.~~

Formatted: Font: Bold

457

## 458 **References**

- 459 [1] Barker, K.R. & Koenning, S.R. 1998 Developing sustainable systems for nematode  
460 management. *Ann. Rev. Phytopathol.* **36**, 165-205. (doi:10.1146/annurev.phyto.36.1.165).
- 461 [2] Abad, P., Gouzy, J., Aury, J.-M., Castagnone-Sereno, P., Danchin, E.G., Deleury, E.,  
462 Perfus-Barbeoch, L., Anthouard, V., Artiguenave, F. & Blok, V.C. 2008 Genome sequence of

463 the metazoan plant-parasitic nematode *Meloidogyne incognita*. *Nat. Biotech.* **26**, 909.  
464 (doi:10.1038/nbt.1482).

465 [3] Wrather, J.A., Anderson, T., Arsyad, D., Gai, J., Ploper, L., Porta-Puglia, A., Ram, H. &  
466 Yorinori, J. 1997 Soybean disease loss estimates for the top 10 soybean producing countries  
467 in 1994. *Plant disease* **81**, 107-110. (doi:10.1094/PDIS.1997.81.1.107).

468 [4] Wrather, J.A. & Koenning, S.R. 2006 Estimates of disease effects on soybean yields in the  
469 United States 2003 to 2005. *J. Nematol.* **38**, 173-180.

470 [5] Li, J., Zou, C., Xu, J., Ji, X., Niu, X., Yang, J., Huang, X. & Zhang, K.-Q. 2015 Molecular  
471 mechanisms of nematode-nematophagous microbe interactions: basis for biological control of  
472 plant-parasitic nematodes. *Ann. Rev. Phytopathol.* **53**, 67-95. (doi:10.1146/annurev-phyto-  
473 080614-120336).

474 [6] Schmitt, D., Corbin, F. & Nelson, L. 1983 Population dynamics of *Heterodera glycines*  
475 and soybean response in soils treated with selected nematicides and herbicides. *J. Nematol.*  
476 **15**, 432-437.

477 [7] Meyer, S.L. & Roberts, D.P. 2002 Combinations of biocontrol agents for management of  
478 plant-parasitic nematodes and soilborne plant-pathogenic fungi. *J. Nematol.* **34**, 1-8.

479 [8] Nusbaum, C. & Ferris, H. 1973 The role of cropping systems in nematode population  
480 management. *Ann. Rev. Phytopathol.* **11**, 423-440.  
481 (doi:10.1146/annurev.py.11.090173.002231).

482 [9] Okada, H. & Harada, H. 2007 Effects of tillage and fertilizer on nematode communities in  
483 a Japanese soybean field. *Appl. Soil Ecol.* **35**, 582-598. (doi:10.1016/j.apsoil.2006.09.008).

484 [10] Thomas, S. 1978 Population densities of nematodes under seven tillage regimes. *J.*  
485 *Nematol.* **10**, 24.

486 [11] Donald, P., Tyler, D. & Boykin, D. 2009 Short-and long-term tillage effects on  
487 *Heterodera glycines* reproduction in soybean monoculture in west Tennessee. *Soil Tillage Res.*  
488 **104**, 126-133. (doi:10.1016/j.still.2009.02.002).

489 [12] Hamid, M.I., Hussain, M., Wu, Y., Zhang, X., Xiang, M. & Liu, X. 2017 Successive  
490 soybean-monoculture cropping assembles rhizosphere microbial communities for the soil  
491 suppression of soybean cyst nematode. *FEMS Microbiol. Ecol.* **93**.

492 (doi:10.1093/femsec/fiw222).

493 [13] Edwards, J., Johnson, C., Santos-Medellín, C., Lurie, E., Podishetty, N.K., Bhatnagar, S.,  
494 Eisen, J.A. & Sundaresan, V. 2015 Structure, variation, and assembly of the root-associated  
495 microbiomes of rice. *Proc. Natl. Acad. Sci. USA*. **112**, E911-E920.  
496 (doi:10.1073/pnas.1414592112).

497 [14] Lundberg, D.S., Lebeis, S.L., Paredes, S.H., Yourstone, S., Gehring, J., Malfatti, S.,  
498 Tremblay, J., Engelbrektson, A., Kunin, V. & Del Rio, T.G. 2012 Defining the core  
499 *Arabidopsis thaliana* root microbiome. *Nature* **488**, 86-90. (doi:10.1038/nature11237).

500 [15] Toju, H., Peay, K.G., Yamamichi, M., Narisawa, K., Hiruma, K., Naito, K., Fukuda, S.,  
501 Ushio, M., Nakaoka, S., Onoda, Y., et al. 2018 Core microbiomes for sustainable  
502 agroecosystems. *Nat. Plants* **4**, 247–257. (doi:10.1038/s41477-018-0139-4).

503 [16] Schlaeppi, K. & Bulgarelli, D. 2015 The plant microbiome at work. *Mol. Plant-Microbe*  
504 *Int.* **28**, 212-217. (doi:10.1094/MPMI-10-14-0334-FI).

505 [17] Mendes, R., Kruijt, M., De Bruijn, I., Dekkers, E., van der Voort, M., Schneider, J.H.,  
506 Piceno, Y.M., DeSantis, T.Z., Andersen, G.L. & Bakker, P.A. 2011 Deciphering the  
507 rhizosphere microbiome for disease-suppressive bacteria. *Science* **332**, 1097-1100.  
508 (doi:10.1126/science.1203980).

509 [18] Berendsen, R.L., Pieterse, C.M. & Bakker, P.A. 2012 The rhizosphere microbiome and  
510 plant health. *Trends Plant Sci.* **17**, 478-486. (doi:10.1016/j.tplants.2012.04.001).

511 [19] Mendes, R., Garbeva, P. & Raaijmakers, J.M. 2013 The rhizosphere microbiome:  
512 significance of plant beneficial, plant pathogenic, and human pathogenic microorganisms.  
513 *FEMS Microbiol. Rev.* **37**, 634-663. (doi:10.1111/1574-6976.12028).

514 [20] Cha, J.-Y., Han, S., Hong, H.-J., Cho, H., Kim, D., Kwon, Y., Kwon, S.-K., Crüsemann,  
515 M., Lee, Y.B. & Kim, J.F. 2016 Microbial and biochemical basis of a *Fusarium* wilt-  
516 suppressive soil. *ISME J.* **10**, 119. (doi:10.1038/ismej.2015.95).

517 [21] Hussain, M., Hamid, M.I., Tian, J., Hu, J., Zhang, X., Chen, J., Xiang, M. & Liu, X. 2018  
518 Bacterial community assemblages in the rhizosphere soil, root endosphere and cyst of  
519 soybean cyst nematode-suppressive soil challenged with nematodes. *FEMS Microbiol. Ecol.*  
520 **94**, fiy142.

521 [22] Gavassoni, W.L., Tylka, G.L. & Munkvold, G.P. 2001 Relationships between tillage and  
522 spatial patterns of *Heterodera glycines*. *Phytopathology* **91**, 534-545.  
523 (doi:10.1094/PHYTO.2001.91.6.534.).

524 [23] Sato, H. & Murakami, N. 2008 Reproductive isolation among cryptic species in the  
525 ectomycorrhizal genus *Strobilomyces*: population-level CAPS marker-based genetic analysis.  
526 *Mol. Phyl. Evol.* **48**, 326-334. (doi:10.1016/j.ympev.2008.01.033).

527 [24] Takada-Hoshino, Y. & Matsumoto, N. 2004 An improved DNA extraction method using  
528 skim milk from soils that strongly adsorb DNA. *Microbes Env.* **19**, 13-19.  
529 (doi:10.1264/jsme2.19.13).

530 [25] Caporaso, J.G., Lauber, C.L., Walters, W.A., Berg-Lyons, D., Lozupone, C.A.,  
531 Turnbaugh, P.J., Fierer, N. & Knight, R. 2011 Global patterns of 16S rRNA diversity at a  
532 depth of millions of sequences per sample. *Proc. Natl. Acad. Sci. USA.* **108**, 4516-4522.  
533 (doi:10.1073/pnas.1000080107).

534 [26] Lundberg, D.S., Yourstone, S., Mieczkowski, P., Jones, C.D. & Dangl, J.L. 2013  
535 Practical innovations for high-throughput amplicon sequencing. *Nat. Methods* **10**, 999-1002.  
536 (doi:10.1038/nmeth.2634).

537 [27] Apprill, A., McNally, S., Parsons, R. & Weber, L. 2015 Minor revision to V4 region SSU  
538 rRNA 806R gene primer greatly increases detection of SAR11 bacterioplankton. *Aquat*  
539 *Microb Ecol* **75**, 129-137. (doi:10.3354/ame01753).

540 [28] Stevens, J.L., Jackson, R.L. & Olson, J.B. 2013 Slowing PCR ramp speed reduces  
541 chimera formation from environmental samples. *J. Microbiol. Methods* **93**, 203-205.  
542 (doi:10.1016/j.mimet.2013.03.013).

543 [29] Hamady, M., Walker, J.J., Harris, J.K., Gold, N.J. & Knight, R. 2008 Error-correcting  
544 barcoded primers for pyrosequencing hundreds of samples in multiplex. *Nat. Methods* **5**, 235-  
545 237. (doi:10.1038/nmeth.1184).

546 [30] Toju, H., Tanabe, A.S., Yamamoto, S. & Sato, H. 2012 High-coverage ITS primers for  
547 the DNA-based identification of ascomycetes and basidiomycetes in environmental samples.  
548 *PLOS ONE* **7**, e40863. (doi:10.1371/journal.pone.0040863).

549 [31] Tanabe, A.S. 2018 Claident v0.2.2018.05.29, a software distributed by author at  
550 <http://www.fifthdimension.jp/>.



551 [32] Tanabe, A.S. & Toju, H. 2013 Two new computational methods for universal DNA  
552 barcoding: a benchmark using barcode sequences of bacteria, archaea, animals, fungi, and  
553 land plants. *PLOS ONE* **8**, e76910. (doi:10.1371/journal.pone.0076910).

554 [33] Rognes, T., Mahé, F., Flouri, T., Quince, C. & Nichols, B. 2014 Vsearch: program  
555 available at <https://github.com/torognes/vsearch>.

556 [34] Huson, D.H., Auch, A.F., Qi, J. & Schuster, S.C. 2007 MEGAN analysis of metagenomic  
557 data. *Genome Res.* **17**, 377-386. (doi:10.1101/gr.5969107).

558 [35] Toju, H., Tanabe, A. & Ishii, H. 2016 Ericaceous plant–fungus network in a harsh alpine–  
559 subalpine environment. *Mol. Ecol.* **25**, 3242-3257. (doi:10.1111/mec.13680).

560 [36] Toju, H., Yamamoto, S., Tanabe, A.S., Hayakawa, T. & Ishii, H.S. 2016 Network  
561 modules and hubs in plant-root fungal biome. *J. R. Soc. Interface* **13**, 20151097.  
562 (doi:10.1098/rsif.2015.1097).

563 [37] Peay, K.G., Russo, S.E., McGuire, K.L., Lim, Z., Chan, J.P., Tan, S. & Davies, S.J. 2015  
564 Lack of host specificity leads to independent assortment of dipterocarps and ectomycorrhizal  
565 fungi across a soil fertility gradient. *Ecol. Lett.* **18**, 807-816. (doi:10.1111/ele.12459).

566 [38] Oksanen, J., Blanchet, F.G., Kindt, R., Legendre, P., Minchin, P.R., O'Hara, R.B.,  
567 Simpson, G.L., Solymos, P., Stevens, M.H.H. & Wagner, H. 2012 Vegan: community ecology  
568 package. R package version 2.0-3 available at <http://CRAN.R-project.org/package=vegan>.

569 [39] R-Core-Team. 2018 R 3.5.1: A language and environment for statistical computing  
570 available at <http://www.R-project.org/>.

571 [40] Anderson, M.J. 2001 A new method for non-parametric multivariate analysis of variance.  
572 *Austral Ecol.* **26**, 32-46. (doi:10.1111/j.1442-9993.2001.01070.pp.x).

573 [41] Kurtz, Z.D., Mueller, C.L., Miraldi, E.R., Littman, D.R., Blaser, M.J. & Bonneau, R.A.  
574 2015 Sparse and compositionally robust inference of microbial ecological networks. *PLOS*  
575 *Comp. Biol.* **11**, e1004226. (doi:10.1371/journal.pcbi.1004226).

576 [42] Csardi, G. & Nepusz, T. 2006 The igraph software package for complex network  
577 research. *Int. J. Complex Syst.* **1695**, 1-9.

578 [43] Esnard, J., Potter, T.L. & Zuckerman, B.M. 1995 *Streptomyces costaricanus* sp. nov.,  
579 isolated from nematode-suppressive soil. *International Journal of Systematic and*

580 *Evolutionary Microbiology* **45**, 775-779. (doi:10.1099/00207713-45-4-775).

581 [44] Chubachi, K., Furukawa, M., Fukuda, S., Takahashi, S., Matsumura, S., Itagawa, H.,  
582 Shimizu, T. & Nakagawa, A. 1999 Control of root-knot nematodes by *Streptomyces*:  
583 Screening of root-knot nematode-controlling actinomycetes and evaluation of their usefulness  
584 in a pot test. *Nematol. Res.* **29**, 42-45. (doi:10.3725/jjn1993.29.2\_42).

585 [45] Siddiqui, Z. & Mahmood, I. 1999 Role of bacteria in the management of plant parasitic  
586 nematodes: a review. *Biores. Tech.* **69**, 167-179. (doi:10.1016/S0960-8524(98)00122-9).

587 [46] Samac, D.A. & Kinkel, L.L. 2001 Suppression of the root-lesion nematode  
588 (*Pratylenchus penetrans*) in alfalfa (*Medicago sativa*) by *Streptomyces* spp. *Plant Soil* **235**,  
589 35-44. (doi:10.1023/A:1011820002779).

590 [47] Baquiran, J.-P., Thater, B., Sedky, S., De Ley, P., Crowley, D. & Orwin, P.M. 2013  
591 Culture-independent investigation of the microbiome associated with the nematode  
592 *Acrobeloides maximus*. *PLOS ONE* **8**, e67425. (doi:10.1371/journal.pone.0067425).

593 [48] Cheng, X.-Y., Tian, X.-L., Wang, Y.-S., Lin, R.-M., Mao, Z.-C., Chen, N. & Xie, B.-Y.  
594 2013 Metagenomic analysis of the pinewood nematode microbiome reveals a symbiotic  
595 relationship critical for xenobiotics degradation. *Sci. Rep.* **3**, 1869. (doi:10.1038/srep01869).

596 [49] Tian, X., Cheng, X., Mao, Z., Chen, G., Yang, J. & Xie, B. 2011 Composition of bacterial  
597 communities associated with a plant-parasitic nematode *Bursaphelenchus mucronatus*. *Curr.*  
598 *Biol.* **62**, 117-125. (doi:10.1007/s00284-010-9681-7).

599 [50] Siddiqui, I.A. & Ehteshamul-Haque, S. 2001 Suppression of the root rot–root knot  
600 disease complex by *Pseudomonas aeruginosa* in tomato: The influence of inoculum density,  
601 nematode populations, moisture and other plant-associated bacteria. *Plant Soil* **237**, 81-89.  
602 (doi:10.1023/A:1013313103032).

603 [51] Siddiqui, I. & Shaukat, S. 2004 Systemic resistance in tomato induced by biocontrol  
604 bacteria against the root- knot nematode, *Meloidogyne javanica* is independent of salicylic  
605 acid production. *J. Phytopathol.* **152**, 48-54. (doi:10.1046/j.1439-0434.2003.00800.x).

606 [52] Siddiqui, I.A., Shaukat, S.S., Sheikh, I.H. & Khan, A. 2006 Role of cyanide production  
607 by *Pseudomonas fluorescens* CHA0 in the suppression of root-knot nematode, *Meloidogyne*  
608 *javanica* in tomato. *World J. Microbiol. Biotechnol.* **22**, 641-650. (doi:10.1007/s11274-005-  
609 9084-2).

- 610 [53] Siddiqui, I.A., Haas, D. & Heeb, S. 2005 Extracellular protease of *Pseudomonas*  
611 *fluorescens* CHA0, a biocontrol factor with activity against the root-knot nematode  
612 *Meloidogyne incognita*. *Appl. Env. Microbiol.* **71**, 5646-5649. (doi:10.1128/AEM.71.9.5646-  
613 5649.2005).
- 614 [54] Zou, C.G., Tu, H.H., Liu, X.Y., Tao, N. & Zhang, K.Q. 2010 PacC in the nematophagous  
615 fungus *Clonostachys rosea* controls virulence to nematodes. *Env. Microbiol.* **12**, 1868-1877.  
616 (doi:10.1111/j.1462-2920.2010.02191.x).
- 617 [55] Baloyi, M., Laing, M. & Yobo, K. 2011 Isolation and in vitro screening of *Bacillus*  
618 *thuringiensis* and *Clonostachys rosea* as biological control agents against sheep nematodes.  
619 *African J. Agr. Res.* **6**, 5047-5054. (doi:10.5897/AJAR11.261).
- 620 [56] Zhang, L., Yang, J., Niu, Q., Zhao, X., Ye, F., Liang, L. & Zhang, K.-Q. 2008  
621 Investigation on the infection mechanism of the fungus *Clonostachys rosea* against nematodes  
622 using the green fluorescent protein. *Appl. Microbiol. Biotech.* **78**, 983-990.  
623 (doi:10.1007/s00253-008-1392-7).
- 624 [57] Zou, C.G., Tao, N., Liu, W.J., Yang, J.K., Huang, X.W., Liu, X.Y., Tu, H.H., Gan, Z.W. &  
625 Zhang, K.Q. 2010 Regulation of subtilisin- like protease prC expression by nematode cuticle  
626 in the nematophagous fungus *Clonostachys rosea*. *Env. Microbiol.* **12**, 3243-3252.  
627 (doi:10.1111/j.1462-2920.2010.02296.x).
- 628 [58] Liu, B., Liu, X.-Z. & Zhuang, W.-Y. 2005 *Orbilia querci* sp. nov. and its knob-forming  
629 nematophagous anamorph. *FEMS Microbiol. Lett.* **245**, 99-105.  
630 (doi:10.1016/j.femsle.2005.02.027).
- 631 [59] Yang, Y., Yang, E., An, Z. & Liu, X. 2007 Evolution of nematode-trapping cells of  
632 predatory fungi of the Orbiliaceae based on evidence from rRNA-encoding DNA and  
633 multiprotein sequences. *Proc. Natl. Acad. Sci. USA.* **104**, 8379-8384.  
634 (doi:10.1073/pnas.0702770104).
- 635 [60] Yu, H., Duan, J., Wang, B. & Jiang, X. 2012 The function of snodprot in the cerato-  
636 platanin family from *Dactylellina cionopaga* in nematophagous fungi. *Biosci. Biotech.*  
637 *Biochem.* **76**, 1835-1842. (doi:10.1271/bbb.120173).
- 638 [61] Yang, J., Liang, L., Zhang, Y., Li, J., Zhang, L., Ye, F., Gan, Z. & Zhang, K.-Q. 2007  
639 Purification and cloning of a novel serine protease from the nematode-trapping fungus

640 Dactylellina varietas and its potential roles in infection against nematodes. *Appl. Microbiol.*  
641 *Biotech.* **75**, 557-565. (doi:10.1007/s00253-007-0839-6).

642 [62] Moosavi, M.R. & Zare, R. 2012 Fungi as biological control agents of plant-parasitic  
643 nematodes. In *Plant defence: biological control* (eds. J. Mérillon & K. Ramawat), pp. 67-107.  
644 New York, Springer.

645 [63] Timper, P. 2011 Utilization of biological control for managing plant-parasitic nematodes.  
646 In *Biological Control of Plant-Parasitic Nematodes*: (eds. J. Mérillon & K. Ramawat), pp.  
647 259-289. New York, Springer.

648 [64] Wang, G., Liu, Z., Lin, R., Li, E., Mao, Z., Ling, J., Yang, Y., Yin, W.-B. & Xie, B. 2016  
649 Biosynthesis of antibiotic leucinostatins in bio-control fungus *Purpureocillium lilacinum* and  
650 their inhibition on *Phytophthora* revealed by genome mining. *PLOS Pathogens* **12**, e1005685.  
651 (doi:10.1371/journal.ppat.1005685).

652 [65] Lopez-Lima, D., Carrion, G. & Núñez-Sánchez, Á.E. 2014 Isolation of fungi associated  
653 with *Criconeoides* sp. and their potential use in the biological control of ectoparasitic and  
654 semiendoparasitic nematodes in sugar cane. *Austral. J. Crop Sci.* **8**, 389.

655 [66] Goffré, D. & Folgarait, P. 2015 *Purpureocillium lilacinum*, potential agent for biological  
656 control of the leaf-cutting ant *Acromyrmex lundii*. *J. Invert. Pathol.* **130**, 107-115.  
657 (doi:10.1016/j.jip.2015.07.008).

658 [67] Lopez, D.C. & Sword, G.A. 2015 The endophytic fungal entomopathogens *Beauveria*  
659 *bassiana* and *Purpureocillium lilacinum* enhance the growth of cultivated cotton (*Gossypium*  
660 *hirsutum*) and negatively affect survival of the cotton bollworm (*Helicoverpa zea*). *Biol.*  
661 *Control* **89**, 53-60. (doi:10.1016/j.biocontrol.2015.03.010).

662 [68] Siddiqui, I., Atkins, S. & Kerry, B. 2009 Relationship between saprotrophic growth in  
663 soil of different biotypes of *Pochonia chlamydosporia* and the infection of nematode eggs.  
664 *Ann. Appl. Biol.* **155**, 131-141. (doi:10.1111/j.1744-7348.2009.00328.x).

665 [69] Niu, X.-M., Wang, Y.-L., Chu, Y.-S., Xue, H.-X., Li, N., Wei, L.-X., Mo, M.-H. & Zhang,  
666 K.-Q. 2009 Nematodotoxic aurovertin-type metabolites from a root-knot nematode parasitic  
667 fungus *Pochonia chlamydosporia*. *J. Agricul. Food Chem.* **58**, 828-834.  
668 (doi:10.1021/jf903259n).

669 [70] Tobin, J., Haydock, P., Hare, M., Woods, S. & Crump, D. 2008 Effect of the fungus

670 Pochonia chlamydosporia and fosthiazate on the multiplication rate of potato cyst nematodes  
671 (*Globodera pallida* and *G. rostochiensis*) in potato crops grown under UK field conditions.  
672 *Biol. Control* **46**, 194-201. (doi:10.1016/j.biocontrol.2008.03.014).

673 [71] Atkins, S.D., Hidalgo-Diaz, L., Clark, I.M., Morton, C.O., De Oca, N.M. & KERRY,  
674 B.R. 2003 Approaches for monitoring the release of Pochonia chlamydosporia var. catenulata,  
675 a biocontrol agent of root-knot nematodes. *Mycol. Res.* **107**, 206-212.  
676 (doi:<https://doi.org/10.1017/S095375620300724X>).

677 [72] Esser, R. 1983 Fungi that utilize zoospores to parasitize nematodes. *Nematol. Circular*  
678 **No.101**, Department of Agriculture and Consumer Service, Division of Plant Industry.

679 [73] Barr, D. 1970 Two varieties of *Rhizophydium sphaerocarpum* (Chytridiales). *Can. J. Bot.*  
680 **48**, 1067-1071.

681 [74] Dickie, I.A. 2007 Host preference, niches and fungal diversity. *New Phytol.* **174**, 230-  
682 233. (doi:10.1111/j.1469-8137.2007.02055.x).

683 [75] Kuruppu, P., Schneider, R. & Russin, J. 2004 Factors affecting soybean root colonization  
684 by *Calonectria ilicicola* and development of red crown rot following delayed planting. *Plant*  
685 *Disease* **88**, 613-619. (doi:10.1094/PDIS.2004.88.6.613).

686 [76] Vitale, A., Crous, P., Lombard, L. & Polizzi, G. 2013 *Calonectria* diseases on ornamental  
687 plants in Europe and the Mediterranean basin: an overview. *J. Plant Pathol.*, 463-476.  
688 (doi:10.4454/JPP.V9513.007).

689 [77] Verma, M., Brar, S.K., Tyagi, R., Surampalli, R. & Valero, J. 2007 Antagonistic fungi,  
690 *Trichoderma* spp.: panoply of biological control. *Biochem. Engin. J.* **37**, 1-20.  
691 (doi:10.1016/j.bej.2007.05.012).

692 [78] Toju, H., Kishida, O., Katayama, N. & Takagi, K. 2016 Networks depicting the fine-scale  
693 co-occurrences of fungi in soil horizons. *PLOS ONE* **11**, e0165987.  
694 (doi:10.1371/journal.pone.0165987).

695 [79] Koenning, S., Schmitt, D. & Barker, K. 1993 Effects of cropping systems on population  
696 density of *Heterodera glycines* and soybean yield. *Plant Disease* **77**, 780-786. (doi:Doi  
697 10.1094/Pd-77-0780).

698 [80] Chen, S. 2007 Tillage and crop sequence effects on *Heterodera glycines* and soybean

699 yields. *Agronomy J.* **99**, 797-807.

700 [81] Jaffee, B. 2004 Do organic amendments enhance the nematode-trapping fungi  
701 *Dactylellina haptotyla* and *Arthrobotrys oligospora*? *J. Nematol.* **36**, 267.

702 [82] Jaffee, B. 2006 Interactions among a soil organic amendment, nematodes, and the  
703 nematode-trapping fungus *Dactylellina candidum*. *Phytopathology* **96**, 1388-1396.  
704 (doi:doi.org/10.1094/PHYTO-96-1388).

705 [83] Hershman, D. & Bachi, P. 1995 Effect of wheat residue and tillage on *Heterodera*  
706 *glycines* and yield of doublecrop soybean in Kentucky. *Plant Disease* **79**, 631-633. (doi:Doi  
707 10.1094/Pd-79-0631).

708 [84] Verbruggen, E. & Toby Kiers, E. 2010 Evolutionary ecology of mycorrhizal functional  
709 diversity in agricultural systems. *Evol. Appl.* **3**, 547-560. (doi:10.1111/j.1752-  
710 4571.2010.00145.x).

711

712 **Conflict of Interest Statement:** The authors declare that the research was conducted in the  
713 absence of any commercial or financial relationships that could be constructed as conflict of  
714 interest.

715

716 **Table 1.** Relationship between prokaryote/fungal community structure and the biomass of  
 717 soybean individuals. For each dataset (i.e., root prokaryote, root fungal, soil prokaryote, or  
 718 soil fungal data), a PEMANOVA model of community structure was constructed. The  
 719 information of the sampling set (“set 1” or “set 2”) and the dry mass of host soybean  
 720 individuals were included as explanatory variables.

721

| Variable         | df | $F_{\text{model}}$ | $P$      |
|------------------|----|--------------------|----------|
| Root prokaryotes |    |                    |          |
| Sampling set     | 1  | 10.4               | < 0.0001 |
| Dry mass         | 1  | 1.3                | 0.1139   |
| Root fungi       |    |                    |          |
| Sampling set     | 1  | 14.0               | < 0.0001 |
| Dry mass         | 1  | 0.6                | 0.8267   |
| Soil prokaryotes |    |                    |          |
| Sampling set     | 1  | 15.4               | < 0.0001 |
| Dry mass         | 1  | 3.1                | 0.002    |
| Soil fungi       |    |                    |          |
| Sampling set     | 1  | 36.7               | < 0.0001 |
| Dry mass         | 1  | 2.2                | 0.0145   |

722

723 **Table 2.** Prokaryote and fungal OTUs showing strong preferences for host states in the root microbiome datasets. The prokaryote/fungal OTUs  
724 that showed strong preferences for “green” or “no leaf” soybean individuals (preference value  $\geq 3$ ) are shown. The taxonomic assignment results  
725 based on the QCauto–LCA pipeline are shown with the top-hit results of NCBI BLAST searches. The OTU code starting with P (P\_xxxx) and F  
726 (F\_xxxx) are prokaryotes and fungi, respectively.

727

| OTU     | Phylum         | Class               | Order            | Family             | Genus                   | NCBI top hit                           | Accession   | Cover | Identity |
|---------|----------------|---------------------|------------------|--------------------|-------------------------|----------------------------------------|-------------|-------|----------|
| Green   |                |                     |                  |                    |                         |                                        |             |       |          |
| F_0437  | Ascomycota     | -                   | -                | -                  | -                       | <i>Knufia</i> sp.                      | KP235641.1  | 83%   | 98%      |
| No leaf |                |                     |                  |                    |                         |                                        |             |       |          |
| P_3453  | Proteobacteria | Gammaproteobacteria | Xanthomonadales  | Rhodanobacteraceae | -                       | <i>Dyella marensis</i>                 | LN890104.1  | 100%  | 99%      |
| P_3207  | Proteobacteria | Gammaproteobacteria | Legionellales    | Coxiellaceae       | <i>Aquicella</i>        | <i>Aquicella siphonis</i>              | NR_025764.1 | 100%  | 94%      |
| P_2827  | Proteobacteria | Betaproteobacteria  | -                | -                  | -                       | <i>Duganella zoogloeoides</i>          | KT983992.1  | 100%  | 100%     |
| P_2733  | Proteobacteria | Betaproteobacteria  | Burkholderiales  | Oxalobacteraceae   | <i>Herbaspirillum</i>   | <i>Herbaspirillum chlorophenolicum</i> | MG571754.1  | 100%  | 100%     |
| P_2590  | Proteobacteria | Alphaproteobacteria | -                | -                  | -                       | <i>Croceicoccus mobilis</i>            | NR_152701.1 | 100%  | 88%      |
| P_2481  | Proteobacteria | Alphaproteobacteria | Rickettsiales    | Rickettsiaceae     | -                       | <i>Rickettsia japonica</i>             | KU586263.1  | 100%  | 91%      |
| P_2279  | Proteobacteria | Alphaproteobacteria | Rhizobiales      | Xanthobacteraceae  | <i>Labrys</i>           | <i>Labrys monachus</i>                 | KT694157.1  | 100%  | 100%     |
| P_2042  | Proteobacteria | Alphaproteobacteria | Caulobacterales  | Caulobacteraceae   | <i>Phenylobacterium</i> | <i>Phenylobacterium</i> sp.            | JX458410.1  | 100%  | 99%      |
| P_3664  | Proteobacteria | -                   | -                | -                  | -                       | <i>Desulfofrigus oceanense</i>         | AB568590.1  | 97%   | 93%      |
| P_3658  | Proteobacteria | -                   | -                | -                  | -                       | <i>Rudaea</i> sp.                      | KM253197.1  | 100%  | 85%      |
| P_1748  | Planctomycetes | Planctomycetia      | Planctomycetales | Gemmataceae        | <i>Gemmata</i>          | <i>Gemmata</i> sp.                     | GQ889445.1  | 100%  | 99%      |



|        |                |                |                  |                   |                     |                                     |             |      |      |
|--------|----------------|----------------|------------------|-------------------|---------------------|-------------------------------------|-------------|------|------|
| P_1278 | Chloroflexi    | Thermomicrobia | -                | -                 | -                   | <i>Sphaerobacter thermophilus</i>   | AJ871227.1  | 100% | 92%  |
| P_1058 | Bacteroidetes  | -              | -                | -                 | -                   | <i>Chitinophaga polysaccharea</i>   | MG322237.1  | 100% | 92%  |
| P_1049 | Bacteroidetes  | -              | -                | -                 | -                   | <i>Pedobacter terrae</i>            | MG819444.1  | 100% | 98%  |
| P_0994 | Bacteroidetes  | -              | -                | -                 | -                   | <i>Chitinophaga terrae</i>          | LN890054.1  | 100% | 95%  |
| P_0887 | Bacteroidetes  | Chitinophagia  | Chitinophagales  | Chitinophagaceae  | <i>Niastella</i>    | <i>Niastella koreensis</i>          | NR_074595.1 | 100% | 100% |
| P_0498 | Actinobacteria | Actinobacteria | Streptomycetales | Streptomycetaceae | -                   | <i>Streptomyces albiacialis</i>     | KP170480.1  | 100% | 98%  |
| P_0444 | Actinobacteria | Actinobacteria | Streptomycetales | Streptomycetaceae | <i>Streptomyces</i> | <i>Streptomyces olivaceoviridis</i> | KP823723.1  | 100% | 98%  |
| F_0796 | Basidiomycota  | -              | -                | -                 | -                   | <i>Classiculaceae</i> sp.           | KY548838.1  | 92%  | 84%  |
| F_0792 | Basidiomycota  | -              | -                | -                 | -                   | <i>Classiculaceae</i> sp.           | KY548838.1  | 92%  | 83%  |
| F_0790 | Basidiomycota  | -              | -                | -                 | -                   | <i>Classiculaceae</i> sp.           | KY548838.1  | 91%  | 83%  |
| F_0786 | Basidiomycota  | -              | -                | -                 | -                   | <i>Classiculaceae</i> sp.           | KY548838.1  | 90%  | 84%  |

729 **Table 3.** Prokaryote and fungal OTUs showing strong preferences for host states in the soil microbiome datasets. The prokaryote/fungal OTUs  
730 that showed strong preferences for “green” or “no leaf” soybean individuals (preference value  $\geq 3$ ) are shown. The taxonomic assignment results  
731 based on the QCauto–LCA pipeline are shown with the top-hit results of NCBI BLAST searches. The OTU code starting with P (P\_xxxx) and F  
732 (F\_xxxx) are prokaryotes and fungi, respectively.

733

| OTU     | Phylum         | Class               | Order             | Family              | Genus                | NCBI top hit                       | Accession   | Cover | Identity |
|---------|----------------|---------------------|-------------------|---------------------|----------------------|------------------------------------|-------------|-------|----------|
| Green   |                |                     |                   |                     |                      |                                    |             |       |          |
| P_0697  | Actinobacteria | -                   | -                 | -                   | -                    | <i>Gaiella occulta</i>             | NR_118138.1 | 100%  | 91%      |
| P_1264  | Chloroflexi    | Thermomicrobia      | Sphaerobacterales | Sphaerobacteraceae  | <i>Sphaerobacter</i> | <i>Shewanella fodinae</i>          | FM887036.1  | 98%   | 84%      |
| P_1281  | Chloroflexi    | Thermomicrobia      | -                 | -                   | -                    | <i>Thermomicrobium carboxidum</i>  | NR_134218.1 | 100%  | 87%      |
| P_2949  | Proteobacteria | Deltaproteobacteria | Myxococcales      | Kofleriaceae        | <i>Haliangium</i>    | <i>Koferia flava</i>               | HF937255.1  | 100%  | 91%      |
| P_3762  | -              | -                   | -                 | -                   | -                    | <i>Planctomycetales bacterium</i>  | AY673390.1  | 98%   | 94%      |
| P_3715  | -              | -                   | -                 | -                   | -                    | <i>Brochothrix thermosphacta</i>   | MG807446.1  | 99%   | 86%      |
| P_0032  | -              | -                   | -                 | -                   | -                    | <i>Nitrosocosmicus exaquare</i>    | CP017922.1  | 100%  | 99%      |
| F_0477  | Ascomycota     | -                   | -                 | -                   | -                    | No significant match               | -           | -     | -        |
| F_0141  | Ascomycota     | Eurotiomycetes      | -                 | -                   | -                    | <i>Penicillium clavigerum</i>      | NR_121317.1 | 100%  | 81%      |
| F_0700  | Basidiomycota  | Tremellomycetes     | Filobasidiales    | Piskurozymaceae     | <i>Solicozozyma</i>  | <i>Solicozozyma terreus</i>        | KY102958.1  | 100%  | 100%     |
| F_0734  | Basidiomycota  | Tremellomycetes     | Tremellales       | Trimorphomycetaceae | <i>Saitozyma</i>     | <i>Saitozyma podzolica</i>         | KY102943.1  | 82%   | 99%      |
| F_0738  | Basidiomycota  | Tremellomycetes     | Tremellales       | Trimorphomycetaceae | <i>Saitozyma</i>     | <i>Saitozyma podzolica</i>         | KY102943.1  | 84%   | 99%      |
| No leaf |                |                     |                   |                     |                      |                                    |             |       |          |
| P_3294  | Proteobacteria | Gammaproteobacteria | Pseudomonadales   | Pseudomonadaceae    | <i>Pseudomonas</i>   | <i>Pseudomonas psychrotolerans</i> | KY623077.1  | 100%  | 100%     |

|        |                  |                     |                     |                      |                         |                                       |             |      |      |
|--------|------------------|---------------------|---------------------|----------------------|-------------------------|---------------------------------------|-------------|------|------|
| P_3256 | Proteobacteria   | Gammaproteobacteria | Nevskiales          | Sinobacteraceae      | <i>Nevskia</i>          | <i>Nevskia persephonica</i>           | JQ710442.1  | 97%  | 99%  |
| P_3189 | Proteobacteria   | Gammaproteobacteria | Cellvibrionales     | Cellvibrionaceae     | <i>Cellvibrio</i>       | <i>Cellvibrio mixtus</i>              | KC329916.1  | 100% | 100% |
| P_3308 | Proteobacteria   | Gammaproteobacteria | -                   | -                    | -                       | <i>Steroidobacter</i> sp.             | KP185148.1  | 100% | 95%  |
| P_3093 | Proteobacteria   | Deltaproteobacteria | Myxococcales        | -                    | -                       | <i>Sorangineae bacterium</i>          | JF719608.1  | 100% | 94%  |
| P_3004 | Proteobacteria   | Deltaproteobacteria | Myxococcales        | Polyangiaceae        | <i>Byssovorax</i>       | <i>Polyangium spumosum</i>            | KX572839.2  | 100% | 97%  |
| P_3114 | Proteobacteria   | Deltaproteobacteria | -                   | -                    | -                       | <i>Stigmatella hybrida</i>            | KX572784.2  | 100% | 91%  |
| P_2747 | Proteobacteria   | Betaproteobacteria  | Burkholderiales     | Oxalobacteraceae     | -                       | <i>Massilia kyonggiensis</i>          | NR_126273.1 | 100% | 100% |
| P_2827 | Proteobacteria   | Betaproteobacteria  | -                   | -                    | -                       | <i>Duganella radialis</i>             | LC191531.1  | 100% | 100% |
| P_2552 | Proteobacteria   | Alphaproteobacteria | Sphingomonadales    | Sphingomonadaceae    | -                       | <i>Novosphingobium sedimicola</i>     | KX987160.1  | 100% | 100% |
| P_1637 | Gemmatimonadetes | Gemmatimonadetes    | Gemmatimonadales    | Gemmatimonadaceae    | <i>Gemmatimonas</i>     | <i>Gemmatimonas aurantiaca</i>        | KF228166.1  | 100% | 93%  |
| P_1544 | Gemmatimonadetes | Gemmatimonadetes    | Gemmatimonadales    | Gemmatimonadaceae    | <i>Gemmatimonas</i>     | <i>Gemmatimonas</i> sp.               | LN876485.1  | 100% | 89%  |
| P_0962 | Bacteroidetes    | Sphingobacteriia    | Sphingobacteriales  | Sphingobacteriaceae  | <i>Mucilaginibacter</i> | <i>Mucilaginibacter gotjawali</i>     | AP017313.1  | 100% | 99%  |
| P_0892 | Bacteroidetes    | Chitinophagia       | Chitinophagales     | Chitinophagaceae     | -                       | <i>Ferruginibacter profundus</i>      | NR_148259.1 | 100% | 88%  |
| P_1095 | Bacteroidetes    | -                   | -                   | -                    | -                       | <i>Flavisolibacter ginsengisoli</i>   | NR_041500.1 | 100% | 95%  |
| P_1051 | Bacteroidetes    | -                   | -                   | -                    | -                       | <i>Flavobacterium lindanitolerans</i> | KP875419.1  | 100% | 100% |
| P_1008 | Bacteroidetes    | -                   | -                   | -                    | -                       | <i>Solitaea canadensis</i>            | CP003349.1  | 100% | 88%  |
| P_0652 | Actinobacteria   | Thermoleophilia     | Solirubrobacterales | Solirubrobacteraceae | <i>Solirubrobacter</i>  | <i>Solirubrobacter phytolaccae</i>    | NR_133858.1 | 99%  | 92%  |
| P_5169 | -                | -                   | -                   | -                    | -                       | <i>Desulfotomaculum nigrificans</i>   | NR_074579.1 | 97%  | 85%  |
| P_5087 | -                | -                   | -                   | -                    | -                       | <i>Stenotrophobacter roseus</i>       | NR_146022.1 | 99%  | 97%  |
| P_4649 | -                | -                   | -                   | -                    | -                       | <i>Alkaliimnicola ehrlichii</i>       | NR_074775.1 | 99%  | 81%  |
| P_4607 | -                | -                   | -                   | -                    | -                       | <i>Verrucomicrobia</i>                | JF488114.1  | 100% | 92%  |
| P_4606 | -                | -                   | -                   | -                    | -                       | <i>Ruminococcus flavefaciens</i>      | KX155563.1  | 99%  | 83%  |

|        |               |                 |               |                      |                     |                                              |             |      |      |
|--------|---------------|-----------------|---------------|----------------------|---------------------|----------------------------------------------|-------------|------|------|
| P_4595 | -             | -               | -             | -                    | -                   | <i>Moorella thermoacetica</i>                | NR_043076.1 | 97%  | 84%  |
| P_3783 | -             | -               | -             | -                    | -                   | <i>Fimbrimonas ginsengisoli</i>              | CP007139.1  | 100% | 88%  |
| P_3739 | -             | -               | -             | -                    | -                   | <i>Solibacter usitatus</i>                   | GQ287461.1  | 100% | 88%  |
| F_0866 | Mucoromycota  | Glomeromycetes  | -             | -                    | -                   | <i>Acaulospora delicata</i>                  | JF439203.1  | 45%  | 95%  |
| F_0620 | Basidiomycota | Agaricomycetes  | Polyporales   | -                    | <i>Burgoa</i>       | <i>Burgoa anomala</i>                        | AB972783.1  | 100% | 100% |
| F_0785 | Basidiomycota | -               | -             | -                    | -                   | <i>Radulomyces copelandii</i>                | MG722738.1  | 87%  | 99%  |
| F_0257 | Ascomycota    | Sordariomycetes | Hypocreales   | Bionectriaceae       | <i>Clonostachys</i> | <i>Clonostachys rosea</i>                    | KY320599.1  | 100% | 100% |
| F_0237 | Ascomycota    | Sordariomycetes | Glomerellales | Plectosphaerellaceae | -                   | <i>Plectosphaerella plurivora</i>            | KU204617.1  | 98%  | 99%  |
| F_0413 | Ascomycota    | Sordariomycetes | -             | -                    | -                   | <i>Xylariales</i> sp.                        | KY031690.1  | 100% | 100% |
| F_0163 | Ascomycota    | Orbiliomycetes  | Orbiliales    | Orbiliaceae          | <i>Dactylellina</i> | <i>Dactylellina</i> aff. <i>ellipsospora</i> | KT215204.1  | 100% | 99%  |
| F_0131 | Ascomycota    | Eurotiomycetes  | Eurotiales    | -                    | -                   | <i>Talaromyces verruculosus</i>              | KC937053.1  | 100% | 98%  |
| F_0003 | Ascomycota    | Dothideomycetes | Capnodiales   | Cladosporiaceae      | <i>Cladosporium</i> | <i>Cladosporium cladosporioides</i>          | MG946764.1  | 100% | 100% |
| F_0482 | Ascomycota    | -               | -             | -                    | -                   | <i>Alternaria alternata</i>                  | KY367499.2  | 100% | 100% |
| F_0973 | -             | -               | -             | -                    | -                   | <i>Peniophora incarnata</i>                  | EU918698.1  | 100% | 98%  |

734

735

736 **Table 4.** Prokaryote/fungal OTUs linked to nematophagous fungi in the microbe–microbe networks. For each of the microbe–microbe co-  
737 abundance networks (Fig-figure 4A, C), the prokaryote/fungal OTUs that showed positive co-abundance patterns with *Clonostachys* (F\_0257)  
738 and *Dactylellina* (F\_0163) nematophagous fungal OTUs are listed. The taxonomic assignment results based on the QCauto–LCA pipeline are  
739 shown with the top-hit results of NCBI BLAST searches. The OTU code starting with P (P\_xxxx) and F (F\_xxxx) are prokaryotes and fungi,  
740 respectively.

741

| OTU                                                     | Phylum          | Class               | Order            | Family               | Genus               | NCBI top hit                                 | Accession   | Cover | Identity |
|---------------------------------------------------------|-----------------|---------------------|------------------|----------------------|---------------------|----------------------------------------------|-------------|-------|----------|
| Root: OTUs linked to <i>Clonostachys rosea</i> (F_0257) |                 |                     |                  |                      |                     |                                              |             |       |          |
| P_0510                                                  | Actinobacteria  | Actinobacteria      | Streptomycetales | Streptomycetaceae    | -                   | <i>Streptomyces nigrogriseolus</i>           | MG984076.1  | 100%  | 98%      |
| Soil: OTUs linked to <i>Clonostachys rosea</i> (F_0257) |                 |                     |                  |                      |                     |                                              |             |       |          |
| P_2689                                                  | Proteobacteria  | Betaproteobacteria  | Burkholderiales  | Burkholderiaceae     | <i>Ralstonia</i>    | <i>Ralstonia pickettii</i>                   | MF179868.1  | 100%  | 100%     |
| P_2243                                                  | Proteobacteria  | Alphaproteobacteria | Rhizobiales      | -                    | -                   | <i>Pedomicrobium americanum</i>              | NR_104908.1 | 100%  | 90%      |
| F_0163                                                  | Ascomycota      | Orbiliomycetes      | Orbiliales       | Orbiliaceae          | <i>Dactylellina</i> | <i>Dactylellina</i> aff. <i>ellipsospora</i> | KT215204.1  | 100%  | 99%      |
| F_0278                                                  | Ascomycota      | Sordariomycetes     | Hypocreales      | Nectriaceae          | <i>Calonectria</i>  | <i>Calonectria zuluensis</i>                 | NR_137728.1 | 97%   | 100%     |
| F_0310                                                  | Ascomycota      | Sordariomycetes     | Hypocreales      | Ophiocordycipitaceae | -                   | <i>Purpureocillium lilacinum</i>             | KP691502.1  | 100%  | 100%     |
| Soil: OTUs linked to <i>Dactylellina</i> sp. (F_0163)   |                 |                     |                  |                      |                     |                                              |             |       |          |
| P_2443                                                  | Proteobacteria  | Alphaproteobacteria | Rhodospirillales | -                    | -                   | <i>Azospirillum brasilense</i>               | KY010284.1  | 100%  | 92%      |
| P_2589                                                  | Proteobacteria  | Alphaproteobacteria | -                | -                    | -                   | <i>Elstera litoralis</i>                     | KR856497.1  | 100%  | 92%      |
| P_3774                                                  | -               | -                   | -                | -                    | -                   | <i>Nitrospira japonica</i>                   | LT828648.1  | 100%  | 100%     |
| F_0812                                                  | Chytridiomycota | Chytridiomycetes    | Rhizophydiales   | Rhizophydiaceae      | <i>Rhizophydium</i> | <i>Rhizophydium</i> sp.                      | AY349124.1  | 99%   | 100%     |

|        |            |                 |             |                      |                     |                                  |             |      |      |
|--------|------------|-----------------|-------------|----------------------|---------------------|----------------------------------|-------------|------|------|
| F_0278 | Ascomycota | Sordariomycetes | Hypocreales | Nectriaceae          | <i>Calonectria</i>  | <i>Calonectria zuluensis</i>     | NR_137728.1 | 97%  | 100% |
| F_0265 | Ascomycota | Sordariomycetes | Hypocreales | Clavicipitaceae      | <i>Pochonia</i>     | <i>Pochonia chlamydosporia</i>   | KY977543.1  | 100% | 100% |
| F_0257 | Ascomycota | Sordariomycetes | Hypocreales | Bionectriaceae       | <i>Clonostachys</i> | <i>Clonostachys rosea</i>        | KY320599.1  | 100% | 100% |
| F_0310 | Ascomycota | Sordariomycetes | Hypocreales | Ophiocordycipitaceae | -                   | <i>Purpureocillium lilacinum</i> | KP691502.1  | 100% | 100% |

743 **Figure legends**

744  
745 **Figure 1.** Study site and soybeans. (a) Soybean field in which sampling was conducted. (b)  
746 Soybean states. Soybean individuals were classified into three categories: those heavily  
747 attacked by root-knot nematodes (“no leaf”; left), those exhibited normal growth (“green”;  
748 right), and those showing intermediate characters (“yellow”; middle). (c) Relationship  
749 between soybean states and biomass. Dry mass significantly differed among “no leaf”,  
750 “yellow”, and “green” soybean individuals (ANOVA;  $F_2 = 20.5$ ,  $P < 00001$ ). (d) Spatial  
751 distribution of “no leaf”, “yellow”, and “green” soybean individuals. Sampling sets 1 and 2  
752 are shown separately.

753  
754 **Figure 2.** Prokaryote and fungal community structure. (a) Phylum-level compositions of  
755 prokaryotes in the root and soil datasets. Mean proportions of sequencing reads are shown for  
756 ~~each~~ respective taxa. The numbers of the samples from which sequencing data were  
757 successfully obtained are shown in the parentheses. (b) Order-level compositions of fungi in  
758 the root and soil datasets.

759  
760 **Figure 3.** Diversity of microbiome structures among samples. (a) NMDS of the root  
761 prokaryote dataset. The results of the PERMANOVA, in which sampling set (“set 1” or “set  
762 2”) and plant state (“green”, “yellow”, or “no leaf”) were included as explanatory variables,  
763 are shown. (b) NMDS of the root fungal dataset. (c) NMDS of the soil prokaryote dataset. (d)  
764 NMDS of the soil fungal dataset.

765  
766 **Figure 4.** Microbe–microbe co-abundance networks. (a) Positive co-abundance network of  
767 the root microbiome data. A pairs of OTUs linked by a blue line frequently co-occurred in the  
768 same soybean samples. (b) Negative co-abundance network of the root microbiome data. A

Formatted: Space Before: 0 pt, Line spacing: single, Widow/Orphan control

769 pairs of OTUs linked by a red line rarely co-occurred in the same soybean samples. (c)  
770 Positive co-abundance network of the soil microbiome data. (d) Negative co-abundance  
771 network of the soil microbiome data.

772

773 **Figure 5.** Spatial distribution of nematophagous fungal OTUs. (a) Sampling set 1. For each  
774 soybean individual, the proportions of sequencing reads representing nematophagous fungal  
775 OTUs are shown. (b) Sampling set 2.



## Appendix C

Dear Dr. Haznedaroglu and Prof. Padian,

We would like to re-submit our manuscript entitled “Consortia of anti-nematode fungi and bacteria in the rhizosphere of soybean plants attacked by root-knot nematodes” (RSOS-181693.R1; bioRxiv accession, <http://biorxiv.org/cgi/content/short/365023v1>) for possible publication in *Royal Society Open Science*.

We appreciate the reviewer for his/her constructive comments. Responses to the comments are shown below

This manuscript has never been published before and is not currently being considered for publication elsewhere. The manuscript has been deposited on the bioRxiv preprint server (doi: <https://doi.org/10.1101/332403>). We confirm that the manuscript has been read and approved by all authors.

We hope that we have addressed reviewer comments adequately and constructively.

Sincerely,

Hirokazu Toju

Center for Ecological Research, Kyoto University, Hirano 2-509-3, Otsu, Shiga  
520-2113, Japan

E-mail: [toju.hirokazu.4c@kyoto-u.ac.jp](mailto:toju.hirokazu.4c@kyoto-u.ac.jp)

Tel.: +81-77-549-8234

Fax.: +81-77-549-8201

Reviewer: 2

Comments to the Author(s)

The manuscript is acceptable except a minor comment. Actually *Dactylellina* is trapping fungus and can capture secondary-stage juveniles and *Clonostachys*, *Pochonia* and *Purpureocillium* can parasitize on nematode eggs. Those fungi associated with no-leaf individuals of soybean, that means high nematode densities in no-leaf individuals can stimulate the multiply of those fungi. Authors may discuss this point a little bit.

Response:

The suggested information of *Dactylellina* and other anti-nematode fungi has been included in the revised manuscript (1.353-355, 359-378).
