# Supplementary material for: Consortia of anti-nematode fungi and bacteria in the rhizosphere of soybean plants attacked by root-knot nematodes
Source: PubMed Central journal article supplement (PMC6458363; doi:10.1098/rsos.181693), 2019-03-27
Supplement: rsos181693supp1.pdf [file rsos181693supp1.pdf]

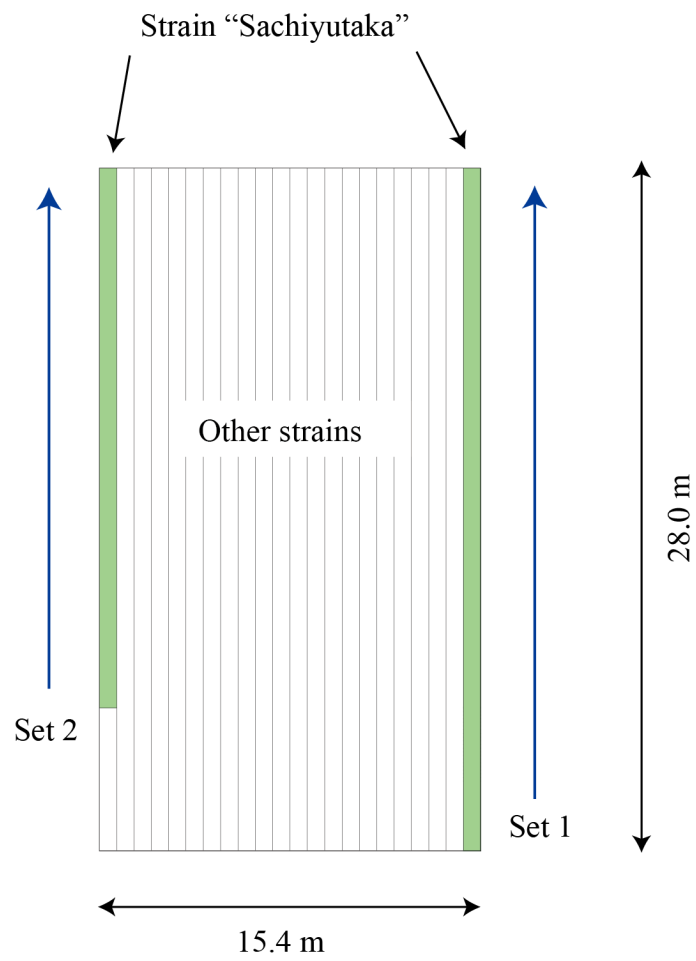

**Figure S1.** Map of the soybean field. Terminal roots and rhizosphere soil of the soybean strain “Sachiyutaka” were sampled from the two lines indicated in the map.
