# Supplementary material for: Consortia of anti-nematode fungi and bacteria in the rhizosphere of soybean plants attacked by root-knot nematodes
Source: PubMed Central journal article supplement (PMC6458363; doi:10.1098/rsos.181693), 2019-03-27
Supplement: rsos181693supp2.pdf [file rsos181693supp2.pdf]

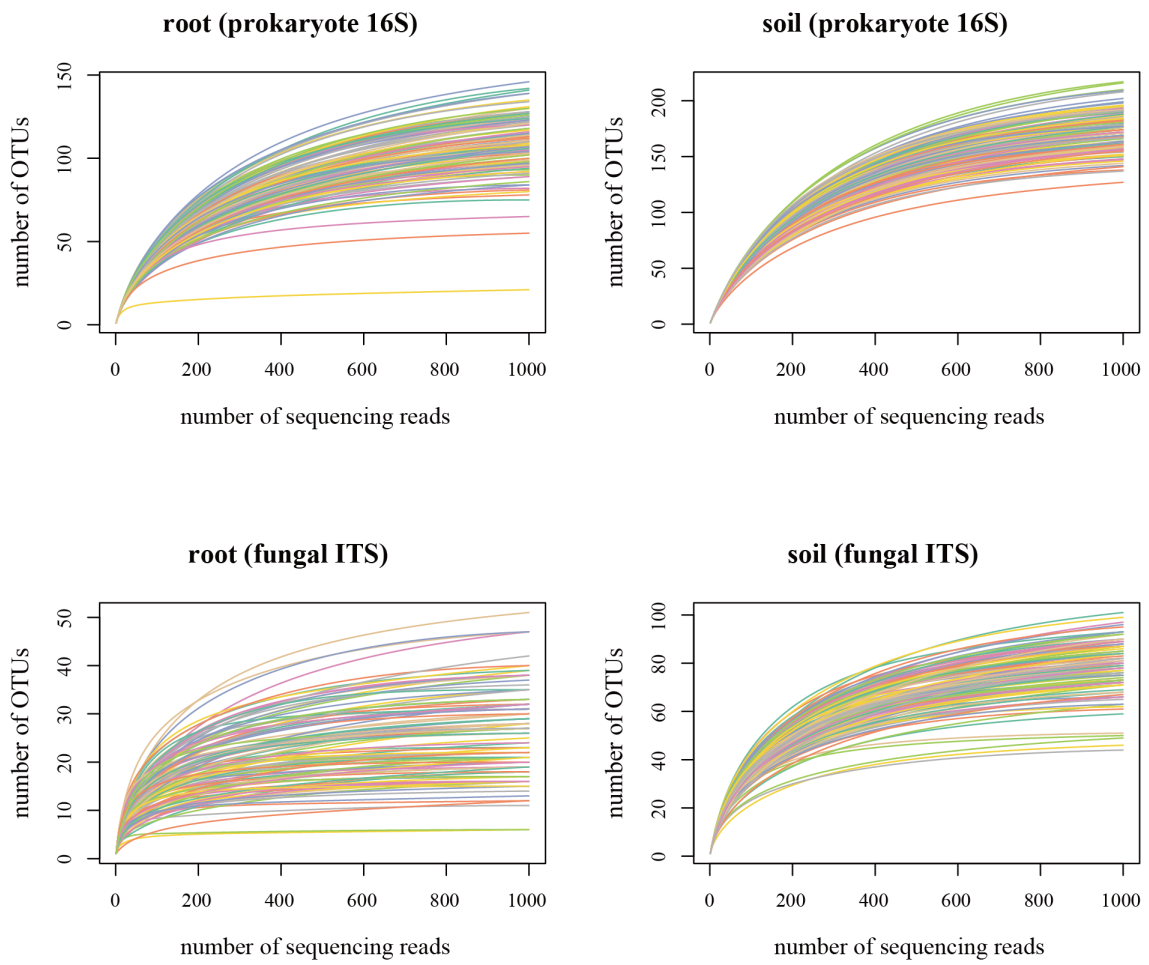

**Figure S2.** Relationship between the number of sequencing reads and that of OTUs.
