# Supplementary material for: Consortia of anti-nematode fungi and bacteria in the rhizosphere of soybean plants attacked by root-knot nematodes
Source: PubMed Central journal article supplement (PMC6458363; doi:10.1098/rsos.181693), 2019-03-27
Supplement: rsos181693supp3.pdf [file rsos181693supp3.pdf]

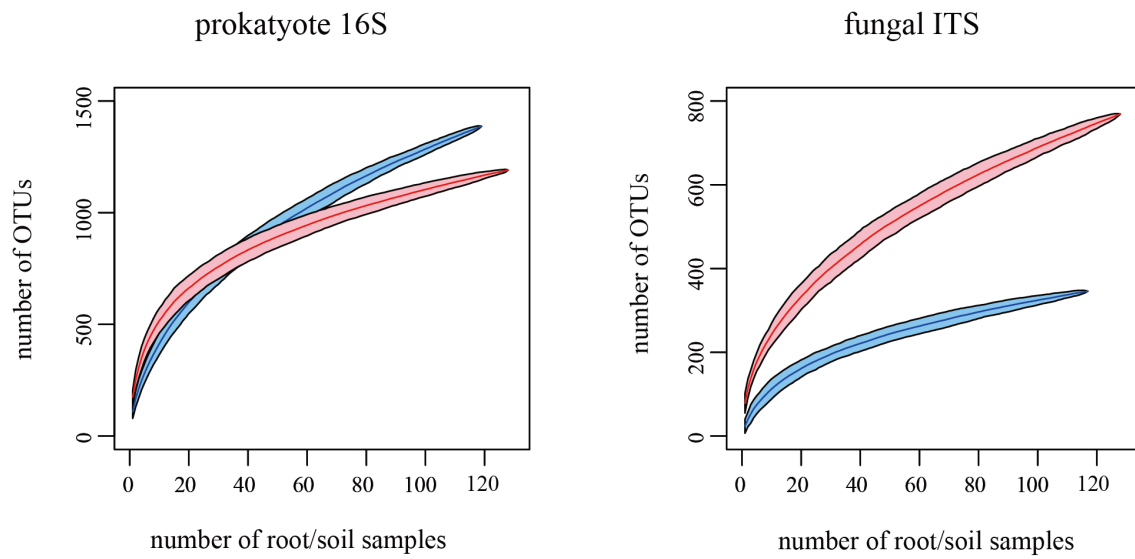

**Figure S3.** Relationship between the number of root/soil samples and that of prokaryote/fungal OTUs. Blue and red curves represent root and soil samples, respectively.
