# Supplementary material for: Consortia of anti-nematode fungi and bacteria in the rhizosphere of soybean plants attacked by root-knot nematodes
Source: PubMed Central journal article supplement (PMC6458363; doi:10.1098/rsos.181693), 2019-03-27
Supplement: rsos181693supp5.pdf [file rsos181693supp5.pdf]

root prokaryotes (set 1)

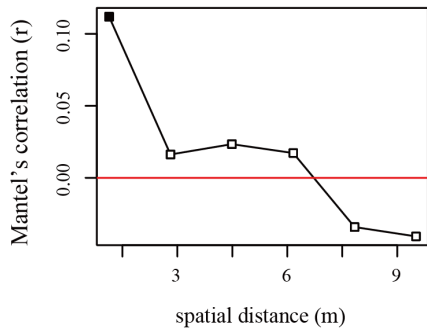

root prokaryotes (set 2)

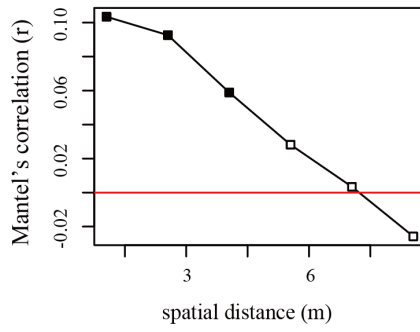

root fungi (set 1)

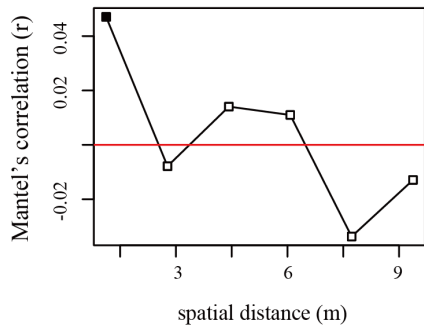

root fungi (set 2)

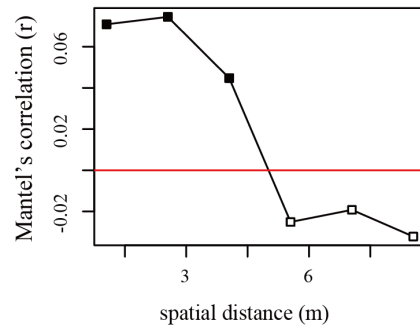

soil prokaryotes (set 1)

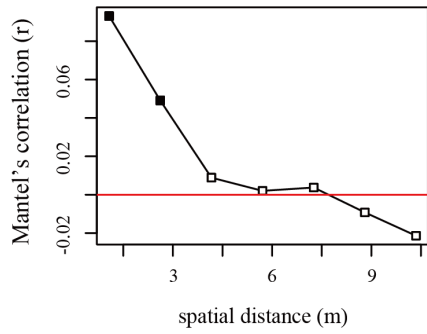

soil prokaryotes (set 2)

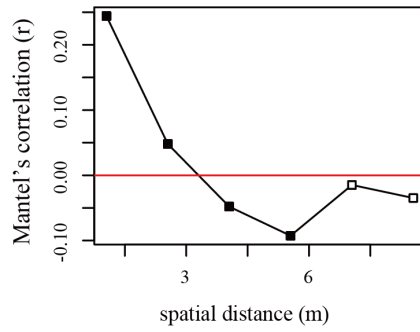

soil fungi (set 1)

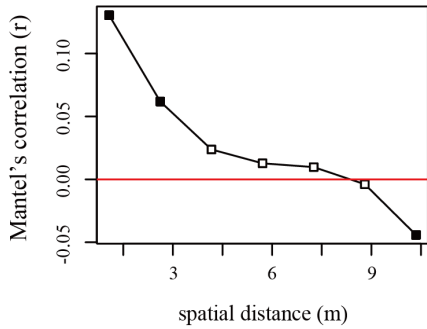

soil fungi (set 2)

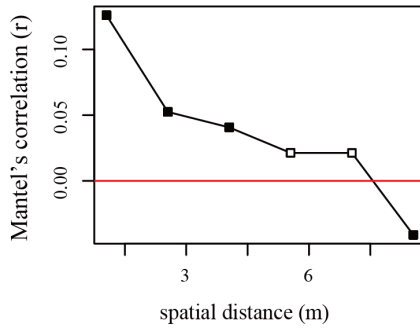

**Figure S5.** Spatial autocorrelation of prokaryote/fungal community structure. A positive value indicated by filled squares represents statistically significant spatial autocorrelation at the spatial distance class ( $\alpha = 0.05$ ). Results for sampling sets 1 and 2 are shown separately.
