# Supplementary material for: Consortia of anti-nematode fungi and bacteria in the rhizosphere of soybean plants attacked by root-knot nematodes
Source: PubMed Central journal article supplement (PMC6458363; doi:10.1098/rsos.181693), 2019-03-27
Supplement: rsos181693supp6.pdf [file rsos181693supp6.pdf]

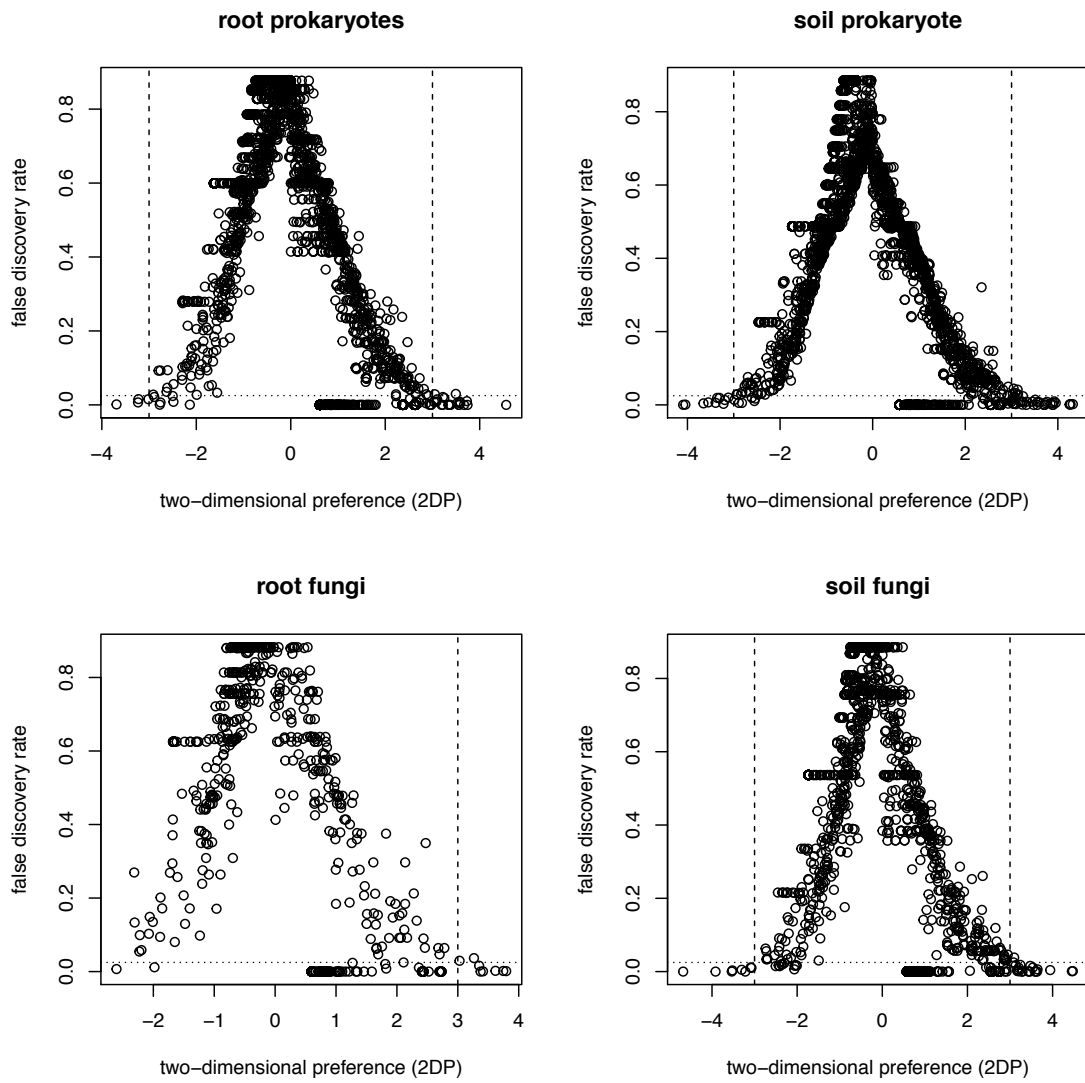

**Figure S6.** Relationship between preference index values and false discovery rates in the randomization analysis for screening host-state-specific OTUs.
