# Supplementary material for: Consortia of anti-nematode fungi and bacteria in the rhizosphere of soybean plants attacked by root-knot nematodes
Source: R Soc Open Sci. 2019 Mar 27;6(3):181693. doi: 10.1098/rsos.181693 (PMC6458363; doi:10.1098/rsos.181693)
Supplement: Suppl.Data1_16S.sequence.fasta [file rsos181693supp8.xlsx]

## Sheet: Sheet1
samplename	superkingdom	kingdom	phylum	class	order	family	genus	species	R_001	R_002	R_003	R_004	R_005	R_006	R_007	R_008	R_009	R_010	R_011	R_012	R_013	R_014	R_015	R_016	R_017	R_018	R_019	R_020	R_021	R_022	R_023	R_024	R_025	R_026	R_027	R_028	R_029	R_030	R_031	R_032	R_033	R_034	R_035	R_036	R_037	R_038	R_039	R_040	R_041
1101:11315:19599__S_052	Archaea		Crenarchaeota	Thermoprotei	Fervidicoccales	Fervidicoccaceae	Fervidicoccus	uncultured Fervidicoccus sp.	0	0	0	0	0	0	0	0	0	0	0	0	0	0	0	0	0	0	0	0	0	0	0	0	0	0	0	0	0	0	0	0	0	0	0	0	0	0	0	0	0
1101:12089:8227__S_008	Archaea		Crenarchaeota	Thermoprotei	Fervidicoccales	Fervidicoccaceae	Fervidicoccus	uncultured Fervidicoccus sp.	0	0	0	0	0	0	0	0	0	0	0	0	0	0	0	0	0	0	0	0	0	0	0	0	0	0	0	0	0	0	0	0	0	0	0	0	0	0	0	0	0
1101:13214:26221__S_092	Archaea		Crenarchaeota	Thermoprotei	Fervidicoccales	Fervidicoccaceae	Fervidicoccus	uncultured Fervidicoccus sp.	0	0	0	0	0	0	0	0	0	0	0	0	0	0	0	0	0	0	0	0	0	0	0	0	0	0	0	0	0	0	0	0	0	0	0	0	0	0	0	0	0
1101:13924:24851__S_075	Archaea		Crenarchaeota	Thermoprotei	Fervidicoccales	Fervidicoccaceae	Fervidicoccus	uncultured Fervidicoccus sp.	0	0	0	0	0	0	0	0	0	0	0	0	0	0	0	0	0	0	0	0	0	0	0	0	0	0	0	0	0	0	0	0	0	0	0	0	0	0	0	0	0
1102:15059:25737__S_006	Archaea		Euryarchaeota	Methanobacteria	Methanobacteriales	Methanobacteriaceae			0	0	0	0	0	0	0	0	0	0	0	0	0	0	0	0	0	0	0	0	0	0	0	0	0	0	0	0	0	0	0	0	0	0	0	0	0	0	0	0	0
2103:10206:12934__S_049	Archaea		Euryarchaeota	Thermoplasmata	Methanomassiliicoccales	Methanomassiliicoccaceae	Methanomassiliicoccus		0	0	0	0	0	0	0	0	0	0	0	0	0	0	0	0	0	0	0	0	0	0	0	0	0	0	0	0	0	0	0	0	0	0	0	0	0	0	0	0	0
1102:19027:14805__S_074	Archaea		Thaumarchaeota				Candidatus Nitrosotalea		0	0	0	0	0	0	0	0	0	0	0	0	0	0	0	0	0	0	0	0	0	0	0	0	0	0	0	0	0	0	0	0	0	0	0	0	0	0	0	0	0
1104:4924:18901__S_087	Archaea		Thaumarchaeota				Candidatus Nitrosotalea		0	0	0	0	0	0	0	0	0	0	0	0	0	0	0	0	0	0	0	0	0	0	0	0	0	0	0	8	0	3	1	0	0	0	0	5	2	0	0	0	0
1101:10070:17494__S_038	Archaea		Thaumarchaeota						0	0	0	0	0	0	0	0	0	0	0	0	0	0	0	0	0	0	0	0	0	0	0	0	0	0	0	0	0	0	0	0	0	0	0	0	0	0	0	0	0
1101:12072:27102__S_046	Archaea		Thaumarchaeota						0	0	0	0	0	0	0	0	0	0	0	0	0	0	0	0	0	0	0	0	0	0	0	0	0	0	0	0	0	0	0	0	0	0	0	0	0	0	0	0	0
1101:23142:12236__S_058	Archaea		Thaumarchaeota						0	0	0	0	0	0	0	0	0	0	0	0	0	0	0	0	0	0	0	0	0	0	0	0	0	0	0	0	0	0	0	0	0	0	0	0	0	0	0	0	0
1101:8946:5922__S_052	Archaea		Thaumarchaeota						0	0	0	0	0	0	0	0	0	0	0	0	0	0	0	0	0	0	0	0	0	0	0	0	0	0	0	0	0	0	0	0	0	0	0	0	0	0	0	0	0
1102:13368:23578__S_008	Archaea		Thaumarchaeota						0	0	0	0	0	0	0	0	0	0	0	0	0	0	0	0	0	0	0	0	0	0	0	0	0	0	0	0	0	0	0	0	0	0	0	0	0	0	0	0	0
1101:16631:19028__S_126	Archaea		Thaumarchaeota						0	0	0	0	0	0	0	0	0	0	0	0	0	0	0	0	0	0	0	0	0	0	0	0	0	0	0	0	0	0	0	0	0	0	0	0	0	0	0	0	0
1102:12297:25410__S_071	Archaea		Thaumarchaeota						0	0	0	0	0	0	0	0	0	0	0	0	0	0	0	0	0	0	0	0	0	0	0	0	0	0	0	0	0	0	0	0	0	0	0	0	0	0	0	0	0
1103:18917:4061__S_029	Archaea		Thaumarchaeota						0	0	0	0	0	0	0	0	0	0	0	0	0	0	0	0	0	0	0	0	0	0	0	0	0	0	0	0	0	0	0	0	0	0	0	0	0	0	0	0	0
1104:19453:17451__S_075	Archaea		Thaumarchaeota						0	0	0	0	0	0	0	0	0	0	0	0	0	0	0	0	0	0	0	0	0	0	0	0	0	0	0	0	0	0	0	0	0	0	0	0	0	0	0	0	0
2102:14840:15628__S_031	Archaea		Thaumarchaeota						0	0	16	0	0	0	0	0	0	0	0	0	0	0	0	0	0	0	0	0	0	0	0	0	0	0	0	0	0	0	0	0	0	0	0	0	0	0	0	0	0
1101:10569:17623__S_083	Archaea								0	0	0	0	0	0	0	0	0	0	0	0	0	0	0	0	0	0	0	0	0	0	0	0	0	0	0	0	0	0	0	0	0	0	0	0	0	0	0	0	0
1101:11021:4511__S_071	Archaea								0	0	0	0	0	0	0	0	0	0	0	0	0	0	0	0	0	0	0	0	0	0	0	0	0	0	0	0	0	3	0	0	0	0	0	0	0	0	0	0	0
1101:12922:23775__S_036	Archaea								0	0	0	0	0	0	0	0	0	0	0	0	0	0	0	0	0	0	0	0	0	0	0	0	0	0	0	0	0	0	0	0	0	0	0	0	0	0	0	0	0
1101:21124:5507__S_006	Archaea								0	0	0	0	0	0	0	0	0	0	0	0	0	0	0	0	0	0	0	0	0	0	0	0	0	0	0	0	0	0	0	0	0	0	0	0	0	0	0	0	0
1101:23964:16091__S_121	Archaea								0	0	0	0	0	0	0	0	0	0	0	0	0	0	0	0	0	0	0	0	0	0	0	0	0	0	0	0	0	0	0	0	0	0	0	0	0	0	0	0	0
1101:25569:9972__S_086	Archaea								0	0	0	0	0	0	0	0	0	0	0	0	0	0	0	0	0	0	0	0	0	0	0	0	0	0	0	0	0	0	0	0	0	0	0	0	0	0	0	0	0
1101:26222:20149__S_086	Archaea								0	0	0	0	0	0	0	0	0	0	0	0	0	0	0	0	0	0	0	0	0	0	0	0	0	0	0	0	0	0	0	0	0	0	0	0	0	0	0	0	0
1101:9485:12425__S_006	Archaea								0	0	0	0	0	0	0	1	0	0	0	0	0	0	0	0	0	0	0	0	0	0	0	0	0	0	0	11	0	0	0	0	0	0	0	0	0	0	0	0	0
1102:20205:7053__S_103	Archaea								0	0	0	0	0	0	0	0	0	0	0	0	0	0	0	0	0	0	0	0	0	0	0	0	0	0	0	0	0	0	0	0	0	0	0	0	0	0	0	0	0
1102:21630:22702__R_099	Archaea								0	0	0	0	8	0	0	0	0	0	0	0	0	0	0	0	0	0	0	0	0	0	0	0	0	0	0	0	0	0	0	0	0	0	0	0	0	0	0	0	0
1102:25085:12865__S_129	Archaea								0	0	0	1	2	0	0	0	0	0	0	0	0	0	0	0	0	0	0	0	0	0	0	0	0	0	0	0	0	0	0	0	0	0	0	0	0	0	0	0	0
1102:26497:8528__S_074	Archaea								0	0	0	0	0	0	0	0	0	0	0	0	0	0	0	0	0	0	0	0	0	0	0	0	0	0	0	0	0	0	0	0	0	0	0	0	0	0	0	0	0
1102:8973:16308__S_096	Archaea								0	0	0	2	0	0	0	0	0	0	0	0	0	0	0	0	0	0	0	0	0	0	0	0	0	0	0	0	0	0	0	0	0	0	0	0	0	0	0	0	0
1101:10889:21384__S_054	Archaea								0	0	0	0	0	0	0	0	0	0	0	0	0	0	0	0	0	0	0	0	0	0	0	0	0	0	0	0	0	0	0	0	0	0	0	0	0	0	0	0	0
1101:11854:18090__S_074	Archaea								0	0	0	0	0	0	0	0	0	0	0	0	0	0	0	0	0	0	0	0	0	0	0	0	0	0	0	0	0	0	0	0	0	0	0	0	0	0	0	0	0
1101:15349:9336__S_122	Archaea								0	0	0	0	0	0	0	0	0	0	0	0	0	0	0	0	0	0	0	0	0	0	0	0	0	0	0	0	0	0	0	0	0	0	0	0	0	0	0	0	0
1101:18881:24468__S_068	Archaea								0	0	0	0	0	0	0	0	0	0	0	0	0	0	0	0	0	0	0	0	0	0	0	0	0	0	0	0	0	0	0	0	0	0	0	0	0	0	0	0	0
1102:13803:27270__S_028	Archaea								0	0	0	0	0	0	0	0	0	0	0	0	0	0	0	0	0	0	0	0	0	0	0	0	0	0	0	0	0	0	0	0	0	0	0	0	0	0	0	0	0
1102:18176:1891__S_021	Archaea								0	0	0	0	0	0	0	0	0	0	0	0	0	0	0	0	0	0	0	0	0	0	0	0	0	0	0	0	0	0	0	0	0	0	0	0	0	0	0	0	0
1102:23778:10742__S_075	Archaea								0	0	0	0	0	0	0	0	0	0	0	0	0	0	0	0	0	0	0	0	0	0	0	0	0	0	0	0	0	0	0	0	0	0	0	0	0	0	0	0	0
1102:24125:10878__S_016	Archaea								0	0	0	0	0	0	0	0	0	0	0	0	0	0	0	0	0	0	0	0	0	0	0	0	0	0	0	0	0	0	0	0	0	0	0	0	0	0	0	0	0
1102:7531:14701__S_022	Archaea								0	0	0	0	0	0	0	0	0	0	0	0	0	0	0	0	0	0	0	0	0	0	0	0	0	0	0	0	0	0	0	0	0	0	0	0	0	0	0	0	0
1103:25139:5959__S_011	Archaea								0	0	0	0	0	0	0	0	0	0	0	0	0	0	0	0	0	0	0	0	0	0	0	0	0	0	0	0	0	0	0	0	0	0	0	0	0	0	0	0	0
1103:9407:11756__S_112	Archaea								0	0	0	0	0	0	0	0	0	0	0	0	0	0	0	0	0	0	0	0	0	0	0	0	0	0	0	0	0	0	0	0	0	0	0	0	0	0	0	0	0
2102:20844:24560__S_057	Archaea								0	0	0	0	0	0	0	0	0	0	0	0	0	0	0	0	0	0	0	0	0	0	0	0	0	0	0	0	0	0	0	0	0	0	0	0	0	0	0	0	0
2103:16582:20845__S_096	Archaea								0	0	0	4	18	16	3	5	0	0	6	0	4	2	0	0	0	0	0	0	0	0	10	0	57	6	12	0	0	0	0	0	0	0	0	1	3	0	0	0	0
2104:15363:22693__S_045	Archaea								0	0	0	0	0	0	0	0	0	0	0	0	0	0	0	0	0	0	0	0	0	0	0	0	0	0	0	0	0	0	0	0	0	0	0	0	0	0	0	0	0
1102:21729:14833__S_070	Bacteria		Acidobacteria	Acidobacteriia	Acidobacteriales	Acidobacteriaceae	Acidobacterium	uncultured Acidobacterium sp.	0	0	0	0	0	0	0	0	0	0	0	0	0	0	0	0	0	0	0	0	0	0	0	0	0	0	0	0	0	0	0	0	0	0	0	0	0	0	0	0	0
1102:22118:13986__S_085	Bacteria		Acidobacteria	Acidobacteriia	Acidobacteriales	Acidobacteriaceae	Acidobacterium	uncultured Acidobacterium sp.	0	0	0	0	0	2	0	0	0	0	0	0	1	0	0	0	0	0	0	0	0	0	0	0	0	0	1	0	0	0	0	0	0	0	0	0	0	0	0	1	0
1103:11456:20058__R_124	Bacteria		Acidobacteria	Acidobacteriia	Acidobacteriales	Acidobacteriaceae	Acidobacterium	uncultured Acidobacterium sp.	0	0	0	0	0	0	0	0	0	0	0	0	0	0	0	0	0	0	0	0	0	0	0	0	0	0	0	0	0	0	0	0	0	0	0	0	0	0	0	0	0
1104:14893:17963__S_062	Bacteria		Acidobacteria	Acidobacteriia	Acidobacteriales	Acidobacteriaceae	Acidobacterium	uncultured Acidobacterium sp.	0	0	0	0	0	0	0	0	0	0	0	0	0	0	0	0	0	0	0	0	0	0	0	0	0	0	0	0	0	0	0	0	0	0	0	0	0	0	0	0	0
2102:2877:16695__S_069	Bacteria		Acidobacteria	Acidobacteriia	Acidobacteriales	Acidobacteriaceae	Acidobacterium	uncultured Acidobacterium sp.	0	0	0	0	0	0	0	0	0	0	0	0	0	0	0	0	0	0	0	0	0	0	0	0	0	0	0	0	0	0	0	0	0	0	0	0	0	0	0	0	0
1101:10487:11997__S_074	Bacteria		Acidobacteria	Acidobacteriia	Acidobacteriales	Acidobacteriaceae	Candidatus Koribacter	uncultured Candidatus Koribacter sp.	0	0	0	0	0	0	0	0	0	0	0	0	0	0	0	0	0	0	0	0	0	0	0	0	0	0	0	0	0	0	0	0	0	0	0	0	0	0	0	0	0
1101:10631:6424__S_130	Bacteria		Acidobacteria	Acidobacteriia	Acidobacteriales	Acidobacteriaceae	Candidatus Koribacter	uncultured Candidatus Koribacter sp.	0	0	0	0	0	0	0	0	0	0	0	0	0	0	0	0	0	0	0	0	0	0	0	0	0	0	0	0	0	0	0	0	0	0	0	0	0	0	0	0	0
1101:11238:26608__S_092	Bacteria		Acidobacteria	Acidobacteriia	Acidobacteriales	Acidobacteriaceae	Candidatus Koribacter	uncultured Candidatus Koribacter sp.	0	0	0	0	0	0	0	0	0	0	0	0	0	0	0	0	0	0	0	0	0	0	0	0	0	0	0	0	0	0	0	0	0	0	0	0	0	0	0	0	0
1101:12369:13979__S_052	Bacteria		Acidobacteria	Acidobacteriia	Acidobacteriales	Acidobacteriaceae	Candidatus Koribacter	uncultured Candidatus Koribacter sp.	0	0	0	0	0	0	0	0	0	0	0	0	0	0	0	0	0	0	0	0	0	0	0	0	0	0	0	0	0	0	0	0	0	0	0	0	0	0	0	0	0
1101:17520:21923__S_090	Bacteria		Acidobacteria	Acidobacteriia	Acidobacteriales	Acidobacteriaceae	Candidatus Koribacter	uncultured Candidatus Koribacter sp.	0	0	0	0	6	0	0	2	3	0	2	0	5	0	0	0	0	6	0	2	0	0	3	0	0	2	0	0	0	7	0	2	0	0	1	0	0	0	0	0	1
1101:18164:14885__S_036	Bacteria		Acidobacteria	Acidobacteriia	Acidobacteriales	Acidobacteriaceae	Candidatus Koribacter	uncultured Candidatus Koribacter sp.	0	0	0	0	0	0	0	0	0	0	0	0	0	0	0	0	0	0	0	0	0	0	0	0	0	0	0	0	0	0	0	0	0	0	0	0	0	0	0	0	0
1101:18598:23109__S_090	Bacteria		Acidobacteria	Acidobacteriia	Acidobacteriales	Acidobacteriaceae	Candidatus Koribacter	uncultured Candidatus Koribacter sp.	0	0	0	0	0	0	0	0	0	0	0	0	0	0	0	0	0	0	0	0	0	0	0	0	0	0	0	0	0	0	0	0	0	0	0	0	0	0	0	0	0
1101:18924:8850__S_085	Bacteria		Acidobacteria	Acidobacteriia	Acidobacteriales	Acidobacteriaceae	Candidatus Koribacter	uncultured Candidatus Koribacter sp.	0	0	0	0	0	0	0	0	0	0	0	0	0	0	0	0	0	0	0	0	0	0	0	0	0	0	0	0	0	0	0	0	0	0	0	0	0	0	0	0	0
1101:23492:21689__S_093	Bacteria		Acidobacteria	Acidobacteriia	Acidobacteriales	Acidobacteriaceae	Candidatus Koribacter	uncultured Candidatus Koribacter sp.	0	0	0	0	0	0	0	0	0	0	0	0	0	0	0	0	0	0	0	0	0	0	0	0	0	0	0	0	0	0	0	0	0	0	0	0	0	0	0	0	0
1101:24221:18760__R_024	Bacteria		Acidobacteria	Acidobacteriia	Acidobacteriales	Acidobacteriaceae	Candidatus Koribacter	uncultured Candidatus Koribacter sp.	0	0	0	0	0	0	0	0	0	0	0	0	0	0	0	0	0	0	0	0	0	1	0	51	0	0	0	0	0	1	0	0	0	0	0	0	0	3	0	0	0
1101:25243:9918__S_091	Bacteria		Acidobacteria	Acidobacteriia	Acidobacteriales	Acidobacteriaceae	Candidatus Koribacter	uncultured Candidatus Koribacter sp.	0	0	0	0	0	0	0	0	0	0	0	0	0	0	0	0	0	0	0	0	0	0	0	0	0	0	0	0	0	0	0	0	0	0	0	0	0	0	0	0	0
1101:25963:7209__R_122	Bacteria		Acidobacteria	Acidobacteriia	Acidobacteriales	Acidobacteriaceae	Candidatus Koribacter	uncultured Candidatus Koribacter sp.	0	0	0	0	0	0	0	0	0	0	0	0	0	0	0	0	0	0	0	0	0	0	0	0	0	0	0	0	0	0	0	0	0	0	0	0	0	1	0	0	0
1101:26046:22562__S_083	Bacteria		Acidobacteria	Acidobacteriia	Acidobacteriales	Acidobacteriaceae	Candidatus Koribacter	uncultured Candidatus Koribacter sp.	0	0	0	0	0	0	0	0	0	0	0	0	0	0	0	0	0	0	0	0	0	0	0	0	0	0	0	0	0	0	0	0	0	0	0	0	0	0	0	0	0
1101:26066:17617__S_079	Bacteria		Acidobacteria	Acidobacteriia	Acidobacteriales	Acidobacteriaceae	Candidatus Koribacter	uncultured Candidatus Koribacter sp.	0	0	0	0	0	0	0	0	0	0	0	0	0	0	0	0	0	0	0	0	0	0	0	0	0	0	0	0	0	0	0	0	0	0	0	0	0	0	0	0	0
1101:5466:16570__S_047	Bacteria		Acidobacteria	Acidobacteriia	Acidobacteriales	Acidobacteriaceae	Candidatus Koribacter	uncultured Candidatus Koribacter sp.	0	0	0	0	0	0	0	0	0	0	0	0	0	0	0	0	0	0	0	0	0	0	0	0	0	0	0	0	0	0	0	0	0	0	0	0	0	0	0	0	0
1101:9709:19029__S_048	Bacteria		Acidobacteria	Acidobacteriia	Acidobacteriales	Acidobacteriaceae	Candidatus Koribacter	uncultured Candidatus Koribacter sp.	0	0	0	0	0	0	0	0	0	0	0	0	0	0	0	0	0	0	0	0	0	0	0	0	0	0	0	0	0	0	0	0	0	0	0	0	0	0	0	0	0
1102:13013:27115__S_070	Bacteria		Acidobacteria	Acidobacteriia	Acidobacteriales	Acidobacteriaceae	Candidatus Koribacter	uncultured Candidatus Koribacter sp.	0	0	0	0	0	0	0	0	0	0	0	0	0	0	0	0	0	0	0	0	0	0	0	0	0	0	0	0	0	0	0	0	0	0	0	0	0	0	0	0	0
1102:13944:24779__S_054	Bacteria		Acidobacteria	Acidobacteriia	Acidobacteriales	Acidobacteriaceae	Candidatus Koribacter	uncultured Candidatus Koribacter sp.	0	2	2	0	0	2	0	9	0	0	1	0	0	0	0	33	0	0	0	0	0	0	0	0	0	1	9	0	0	1	0	8	0	0	0	3	0	47	4	0	0
1102:16007:13190__S_098	Bacteria		Acidobacteria	Acidobacteriia	Acidobacteriales	Acidobacteriaceae	Candidatus Koribacter	uncultured Candidatus Koribacter sp.	0	0	0	0	0	0	0	0	0	0	0	0	0	0	0	0	0	0	0	0	0	0	0	0	0	0	0	0	0	0	0	0	0	0	0	0	0	0	0	0	0
1102:17748:27390__S_012	Bacteria		Acidobacteria	Acidobacteriia	Acidobacteriales	Acidobacteriaceae	Candidatus Koribacter	uncultured Candidatus Koribacter sp.	20	1	3	1	1	4	0	1	3	0	1	0	5	0	0	10	35	0	2	0	0	0	0	0	0	5	0	0	0	21	0	0	0	1	0	0	0	10	1	2	4
1102:19663:9449__S_102	Bacteria		Acidobacteria	Acidobacteriia	Acidobacteriales	Acidobacteriaceae	Candidatus Koribacter	uncultured Candidatus Koribacter sp.	0	0	0	0	0	0	0	0	0	0	0	0	0	0	0	0	0	0	0	0	0	0	0	0	0	0	0	0	0	0	0	0	0	0	0	0	0	0	0	0	0
1102:22755:21094__S_064	Bacteria		Acidobacteria	Acidobacteriia	Acidobacteriales	Acidobacteriaceae	Candidatus Koribacter	uncultured Candidatus Koribacter sp.	0	0	0	0	0	0	0	0	0	0	0	0	0	0	0	0	0	0	0	0	0	0	0	0	0	0	0	0	0	0	0	0	0	0	0	0	0	0	0	0	0
1102:23406:17055__S_014	Bacteria		Acidobacteria	Acidobacteriia	Acidobacteriales	Acidobacteriaceae	Candidatus Koribacter	uncultured Candidatus Koribacter sp.	0	0	0	0	0	0	0	0	0	0	0	0	0	0	0	0	0	0	0	0	0	0	0	0	0	0	0	0	0	0	0	0	0	0	0	0	0	0	0	0	0
1102:23663:9702__S_045	Bacteria		Acidobacteria	Acidobacteriia	Acidobacteriales	Acidobacteriaceae	Candidatus Koribacter	uncultured Candidatus Koribacter sp.	0	0	0	0	0	0	0	0	0	0	0	0	0	0	0	0	0	0	0	0	0	0	0	0	0	0	0	0	0	0	0	0	0	0	0	0	0	0	0	0	0
1102:24284:19941__S_007	Bacteria		Acidobacteria	Acidobacteriia	Acidobacteriales	Acidobacteriaceae	Candidatus Koribacter	uncultured Candidatus Koribacter sp.	0	0	0	0	0	0	0	0	0	0	0	0	0	0	0	0	0	0	0	0	0	0	0	0	0	0	0	0	0	0	0	0	0	0	0	0	0	0	0	0	0
1102:8636:9567__S_072	Bacteria		Acidobacteria	Acidobacteriia	Acidobacteriales	Acidobacteriaceae	Candidatus Koribacter	uncultured Candidatus Koribacter sp.	1	0	1	0	0	0	0	0	9	0	0	0	0	0	0	0	0	0	0	0	0	0	0	0	0	0	7	0	0	0	0	0	0	0	0	0	0	0	0	0	0
1102:9162:16254__S_005	Bacteria		Acidobacteria	Acidobacteriia	Acidobacteriales	Acidobacteriaceae	Candidatus Koribacter	uncultured Candidatus Koribacter sp.	0	0	0	0	0	0	0	0	0	0	0	0	0	0	0	0	0	0	0	0	0	0	0	0	0	0	0	0	0	0	0	0	0	0	0	0	0	0	0	0	0
1101:14617:2934__S_014	Bacteria		Acidobacteria	Acidobacteriia	Acidobacteriales	Acidobacteriaceae	Candidatus Koribacter	uncultured Candidatus Koribacter sp.	0	0	0	0	0	0	0	0	0	0	0	0	0	0	0	0	0	0	0	0	0	0	0	0	0	0	0	0	0	0	0	0	0	0	0	0	0	0	0	0	0
1101:16541:21637__S_052	Bacteria		Acidobacteria	Acidobacteriia	Acidobacteriales	Acidobacteriaceae	Candidatus Koribacter	uncultured Candidatus Koribacter sp.	0	0	0	0	0	0	0	0	0	0	0	0	0	0	0	0	0	0	0	0	0	0	0	0	0	0	0	0	0	0	0	0	0	0	0	0	0	0	0	0	0
1101:23147:16584__S_009	Bacteria		Acidobacteria	Acidobacteriia	Acidobacteriales	Acidobacteriaceae	Candidatus Koribacter	uncultured Candidatus Koribacter sp.	0	0	7	0	0	0	0	0	0	0	0	0	0	0	0	0	0	0	0	0	0	0	0	0	0	0	0	2	0	0	0	0	0	0	0	0	0	0	0	0	0
1101:23826:16850__S_050	Bacteria		Acidobacteria	Acidobacteriia	Acidobacteriales	Acidobacteriaceae	Candidatus Koribacter	uncultured Candidatus Koribacter sp.	0	0	0	0	0	0	0	0	0	0	0	0	0	0	0	0	0	0	0	0	0	0	1	0	0	0	0	0	0	0	0	0	0	0	0	0	0	0	0	0	0
1101:6415:20078__S_051	Bacteria		Acidobacteria	Acidobacteriia	Acidobacteriales	Acidobacteriaceae	Candidatus Koribacter	uncultured Candidatus Koribacter sp.	0	0	0	0	0	0	0	0	0	0	0	0	0	0	0	0	0	0	0	0	0	0	0	0	0	0	0	0	0	0	0	0	0	0	0	0	0	0	0	0	0
1102:11132:10985__S_080	Bacteria		Acidobacteria	Acidobacteriia	Acidobacteriales	Acidobacteriaceae	Candidatus Koribacter	uncultured Candidatus Koribacter sp.	0	0	0	0	0	0	0	0	0	0	0	0	0	0	0	0	0	0	0	0	0	0	0	0	0	0	0	0	0	0	0	0	0	0	0	0	0	0	0	0	0
1102:11403:8683__S_080	Bacteria		Acidobacteria	Acidobacteriia	Acidobacteriales	Acidobacteriaceae	Candidatus Koribacter	uncultured Candidatus Koribacter sp.	0	0	0	0	0	0	0	0	0	0	0	0	0	0	0	0	0	0	0	0	0	0	0	0	0	0	0	0	0	0	0	0	0	0	0	0	0	0	0	0	0
1102:22618:18253__S_069	Bacteria		Acidobacteria	Acidobacteriia	Acidobacteriales	Acidobacteriaceae	Candidatus Koribacter	uncultured Candidatus Koribacter sp.	0	0	0	0	0	0	0	0	0	0	0	0	0	0	0	0	0	0	0	0	0	0	0	0	0	0	0	0	0	0	0	0	0	0	0	0	0	0	0	0	0
1102:25062:24799__S_100	Bacteria		Acidobacteria	Acidobacteriia	Acidobacteriales	Acidobacteriaceae	Candidatus Koribacter	uncultured Candidatus Koribacter sp.	0	0	0	0	0	0	0	0	0	0	0	0	0	0	0	0	0	0	0	0	0	0	0	0	0	0	0	0	0	0	0	0	0	0	0	0	0	0	0	0	0
1102:6593:5862__S_127	Bacteria		Acidobacteria	Acidobacteriia	Acidobacteriales	Acidobacteriaceae	Candidatus Koribacter	uncultured Candidatus Koribacter sp.	0	0	0	0	0	0	0	0	0	0	0	0	0	0	0	0	0	0	0	0	0	0	0	0	0	0	0	0	0	0	0	0	0	0	0	0	0	0	0	0	0
1103:16551:9794__S_024	Bacteria		Acidobacteria	Acidobacteriia	Acidobacteriales	Acidobacteriaceae	Candidatus Koribacter	uncultured Candidatus Koribacter sp.	0	0	2	0	0	1	0	7	0	0	2	0	0	4	0	0	0	6	0	0	0	0	4	0	0	0	1	0	0	3	0	2	0	6	0	0	0	0	0	8	0
1104:26908:8144__S_056	Bacteria		Acidobacteria	Acidobacteriia	Acidobacteriales	Acidobacteriaceae	Candidatus Koribacter	uncultured Candidatus Koribacter sp.	0	0	0	0	0	0	0	0	0	0	0	0	0	0	0	0	0	0	0	0	0	0	0	0	0	0	0	0	0	0	0	0	0	0	0	0	0	0	0	0	0
2101:10879:3712__S_080	Bacteria		Acidobacteria	Acidobacteriia	Acidobacteriales	Acidobacteriaceae	Candidatus Koribacter	uncultured Candidatus Koribacter sp.	0	0	0	0	0	0	0	0	0	0	0	0	0	0	0	0	0	0	0	0	0	0	0	0	0	0	0	0	0	0	0	0	0	0	0	0	0	0	0	0	0
2103:5244:15696__S_041	Bacteria		Acidobacteria	Acidobacteriia	Acidobacteriales	Acidobacteriaceae	Candidatus Koribacter	uncultured Candidatus Koribacter sp.	0	0	0	0	0	0	0	0	0	0	0	0	0	0	0	0	0	0	0	0	0	0	0	0	0	0	0	0	0	0	0	0	0	0	0	0	0	0	0	0	0
2104:23279:15932__S_085	Bacteria		Acidobacteria	Acidobacteriia	Acidobacteriales	Acidobacteriaceae	Candidatus Koribacter	uncultured Candidatus Koribacter sp.	0	0	0	0	0	0	0	0	0	0	0	0	0	0	0	0	0	0	0	0	0	0	0	0	0	0	0	0	0	0	0	0	0	0	0	0	0	0	0	0	0
1101:16880:21536__S_101	Bacteria		Acidobacteria	Acidobacteriia	Acidobacteriales	Acidobacteriaceae	Candidatus Koribacter		0	0	0	0	0	0	0	0	0	0	0	0	0	0	0	0	0	0	0	0	0	0	0	0	0	0	0	0	0	0	0	0	0	0	0	0	0	0	0	0	0
1101:19019:13307__S_006	Bacteria		Acidobacteria	Acidobacteriia	Acidobacteriales	Acidobacteriaceae	Candidatus Koribacter		0	0	0	0	0	0	0	0	0	0	0	0	0	0	0	0	0	0	0	0	0	0	0	0	0	0	0	0	0	0	0	0	0	0	0	0	0	0	0	0	0
1103:16178:14603__R_004	Bacteria		Acidobacteria	Acidobacteriia	Acidobacteriales	Acidobacteriaceae	Candidatus Koribacter		0	0	0	3	0	0	0	0	0	0	0	0	0	0	0	0	0	0	0	0	0	0	0	0	0	0	0	0	0	0	0	0	0	0	0	0	0	0	0	0	0
1103:22394:5787__S_094	Bacteria		Acidobacteria	Acidobacteriia	Acidobacteriales	Acidobacteriaceae	Candidatus Koribacter		0	0	0	0	0	0	0	0	0	0	0	0	0	0	0	0	0	0	0	0	0	0	0	0	0	0	0	0	0	0	0	0	0	0	0	0	0	0	0	0	0
1104:13327:21385__R_057	Bacteria		Acidobacteria	Acidobacteriia	Acidobacteriales	Acidobacteriaceae	Edaphobacter		0	0	0	0	0	0	5	0	0	0	0	0	0	0	0	0	7	0	0	2	0	0	0	0	0	0	0	0	0	0	0	0	0	2	0	0	5	0	0	0	0
1101:11919:16308__S_063	Bacteria		Acidobacteria	Acidobacteriia	Acidobacteriales	Acidobacteriaceae	Granulicella		0	0	0	0	0	0	0	0	0	0	0	0	0	0	0	0	0	0	0	0	0	0	0	0	0	0	0	0	0	0	0	0	0	0	0	0	0	0	0	0	0
1101:18557:19271__R_088	Bacteria		Acidobacteria	Acidobacteriia	Acidobacteriales	Acidobacteriaceae	Terriglobus		0	0	1	0	6	0	0	1	0	0	0	1	0	0	0	0	0	0	0	0	0	0	0	0	0	1	0	0	0	0	0	0	0	0	0	0	0	0	0	14	0
1101:10169:24374__S_032	Bacteria		Acidobacteria	Acidobacteriia	Acidobacteriales	Acidobacteriaceae			0	0	0	0	0	0	0	0	0	0	0	0	0	0	0	0	0	0	0	0	0	0	0	0	0	0	0	0	0	0	0	0	0	0	0	0	0	0	0	0	0
1101:11970:8523__S_025	Bacteria		Acidobacteria	Acidobacteriia	Acidobacteriales	Acidobacteriaceae			0	0	0	0	0	0	0	0	0	0	0	0	0	0	0	0	0	0	0	0	0	0	0	0	0	0	0	0	0	0	0	0	0	0	0	0	0	0	0	0	0
1101:13193:12247__S_035	Bacteria		Acidobacteria	Acidobacteriia	Acidobacteriales	Acidobacteriaceae			1	0	0	0	3	0	0	0	0	1	1	0	0	3	1	0	0	0	0	0	0	0	0	0	0	0	0	0	0	1	0	0	0	0	0	0	0	0	0	0	0
1101:14344:18903__S_102	Bacteria		Acidobacteria	Acidobacteriia	Acidobacteriales	Acidobacteriaceae			0	0	0	0	0	0	0	0	0	0	0	0	0	0	0	0	0	0	0	0	0	0	0	0	0	0	0	0	0	0	0	0	0	0	0	0	0	0	0	0	0
1101:15948:10819__S_021	Bacteria		Acidobacteria	Acidobacteriia	Acidobacteriales	Acidobacteriaceae			0	0	0	0	0	0	0	0	0	0	0	0	0	0	0	0	0	0	0	0	0	0	0	0	0	0	0	0	0	0	0	0	0	0	0	0	0	0	0	0	2
1101:16030:25990__S_086	Bacteria		Acidobacteria	Acidobacteriia	Acidobacteriales	Acidobacteriaceae			0	0	0	0	0	0	0	0	0	0	0	0	0	0	0	0	0	0	0	0	0	0	0	0	0	0	0	0	0	0	0	0	0	0	0	0	0	0	0	0	0
1101:17610:18306__S_115	Bacteria		Acidobacteria	Acidobacteriia	Acidobacteriales	Acidobacteriaceae			0	0	0	0	0	0	0	0	0	0	0	0	0	0	0	0	0	0	0	0	0	0	0	0	0	0	0	0	0	0	0	0	0	0	0	0	0	0	0	0	0
1101:18253:10847__S_090	Bacteria		Acidobacteria	Acidobacteriia	Acidobacteriales	Acidobacteriaceae			0	0	0	0	0	0	0	0	0	0	0	0	0	0	0	0	0	0	0	0	0	0	0	0	0	0	0	0	0	0	0	0	0	0	0	0	0	0	0	0	0
1101:23829:16268__S_020	Bacteria		Acidobacteria	Acidobacteriia	Acidobacteriales	Acidobacteriaceae			0	0	0	0	0	0	0	0	0	0	0	0	0	0	0	0	0	0	0	0	0	0	0	0	0	0	0	0	0	0	0	0	0	0	0	0	0	0	0	0	0
1101:4519:15712__R_080	Bacteria		Acidobacteria	Acidobacteriia	Acidobacteriales	Acidobacteriaceae			58	11	45	15	16	28	9	13	18	3	35	6	4	9	23	6	39	9	4	2	2	14	28	3	32	16	20	9	3	30	0	37	9	22	6	11	0	55	6	17	9
1102:10919:24481__R_024	Bacteria		Acidobacteria	Acidobacteriia	Acidobacteriales	Acidobacteriaceae			1	0	0	0	0	0	0	0	0	0	0	0	0	0	0	0	0	0	0	0	0	0	0	7	0	0	0	3	0	0	0	0	0	0	1	0	0	0	0	0	0
1102:12574:8629__S_069	Bacteria		Acidobacteria	Acidobacteriia	Acidobacteriales	Acidobacteriaceae			0	0	0	0	0	0	0	0	0	0	0	0	0	0	0	0	0	0	0	1	0	0	0	0	0	0	0	0	0	0	0	0	0	0	0	0	0	0	0	0	0
1102:15683:20970__R_049	Bacteria		Acidobacteria	Acidobacteriia	Acidobacteriales	Acidobacteriaceae			3	0	0	4	0	1	0	2	0	0	2	1	4	3	2	0	14	4	0	2	2	0	6	0	0	5	3	10	0	0	0	1	7	5	1	0	0	5	0	0	10
1102:15977:19904__S_097	Bacteria		Acidobacteria	Acidobacteriia	Acidobacteriales	Acidobacteriaceae			0	0	0	0	0	0	0	0	0	0	0	0	0	0	0	0	0	0	0	0	0	0	0	0	0	0	0	0	0	0	0	0	0	0	0	0	0	0	0	0	0
1102:22338:8938__S_012	Bacteria		Acidobacteria	Acidobacteriia	Acidobacteriales	Acidobacteriaceae			0	0	0	0	0	0	0	0	0	0	0	0	0	0	0	0	0	0	0	0	0	0	0	0	0	0	0	0	0	0	0	0	0	0	0	0	0	0	0	0	0
1102:23711:15955__S_075	Bacteria		Acidobacteria	Acidobacteriia	Acidobacteriales	Acidobacteriaceae			0	0	0	0	0	0	0	0	0	0	0	0	0	0	0	0	0	0	0	0	0	0	0	0	0	0	0	0	0	0	0	0	0	0	0	0	0	0	0	0	0
1102:27314:21272__R_127	Bacteria		Acidobacteria	Acidobacteriia	Acidobacteriales	Acidobacteriaceae			0	0	0	4	0	0	0	0	0	0	0	0	0	0	3	0	0	4	12	4	1	2	5	0	0	0	0	0	0	2	0	0	4	0	0	0	0	0	0	0	0
1101:10988:25007__R_127	Bacteria		Acidobacteria	Acidobacteriia	Acidobacteriales	Acidobacteriaceae			0	0	0	0	0	0	0	0	0	0	0	0	0	0	0	0	1	0	0	1	0	0	0	0	0	0	0	22	0	0	0	0	0	0	3	0	0	0	0	0	0
1101:23610:7700__S_044	Bacteria		Acidobacteria	Acidobacteriia	Acidobacteriales	Acidobacteriaceae			0	0	0	0	0	0	0	0	0	0	0	0	0	0	0	0	0	0	0	0	0	0	0	0	0	0	0	0	0	0	0	0	0	0	0	0	0	0	0	0	0
1101:25616:17486__S_085	Bacteria		Acidobacteria	Acidobacteriia	Acidobacteriales	Acidobacteriaceae			0	0	0	0	4	0	0	0	0	0	0	0	0	0	0	0	0	0	0	0	0	0	0	0	0	10	0	0	0	0	0	0	0	0	0	0	0	11	0	0	0
1102:19961:25458__R_027	Bacteria		Acidobacteria	Acidobacteriia	Acidobacteriales	Acidobacteriaceae			0	0	0	0	0	0	1	0	0	0	0	0	0	0	0	0	0	0	0	0	0	5	1	0	0	0	9	0	0	0	0	0	0	1	0	0	0	0	0	0	0
1103:16031:10255__S_053	Bacteria		Acidobacteria	Acidobacteriia	Acidobacteriales	Acidobacteriaceae			0	0	0	0	1	2	0	0	0	0	0	0	0	0	0	0	0	0	0	0	0	0	3	0	0	0	0	1	0	0	0	0	0	0	0	0	0	0	2	0	0
1103:16707:20567__S_023	Bacteria		Acidobacteria	Acidobacteriia	Acidobacteriales	Acidobacteriaceae			0	0	0	0	0	0	0	0	0	0	0	0	0	0	0	0	0	0	0	0	0	0	0	0	0	0	0	0	0	0	0	0	0	0	0	0	0	0	0	0	0
1103:22708:20808__S_083	Bacteria		Acidobacteria	Acidobacteriia	Acidobacteriales	Acidobacteriaceae			0	0	0	0	0	0	0	0	0	0	0	0	0	0	0	0	0	0	0	0	0	0	0	0	0	0	0	0	0	0	0	0	0	0	0	0	0	0	0	0	0
2101:7133:21020__S_013	Bacteria		Acidobacteria	Acidobacteriia	Acidobacteriales	Acidobacteriaceae			0	0	0	0	0	0	0	0	0	0	0	0	0	0	0	0	0	0	0	0	0	0	0	0	0	0	0	0	0	0	0	0	0	0	0	0	0	0	0	0	0
2104:19212:21470__S_055	Bacteria		Acidobacteria	Acidobacteriia	Acidobacteriales	Acidobacteriaceae			0	0	0	0	0	0	0	0	0	0	0	0	0	0	0	0	0	0	0	0	0	0	0	0	0	0	2	0	0	0	0	0	16	0	3	0	0	3	0	0	0
1101:5957:11719__R_075	Bacteria		Acidobacteria	Holophagae	Holophagales	Holophagaceae	Geothrix	uncultured Geothrix sp.	3	3	61	0	2	0	4	27	3	2	15	0	6	0	0	0	0	0	0	0	0	0	0	0	0	0	0	3	0	12	0	6	0	5	5	6	0	0	19	0	0
1101:14587:24515__S_014	Bacteria		Acidobacteria	Holophagae	Holophagales	Holophagaceae	Holophaga	uncultured Holophaga sp.	0	0	0	0	0	0	0	0	0	0	0	0	0	0	0	0	0	0	0	0	0	0	0	0	0	0	0	0	0	0	0	0	0	0	0	0	0	0	0	0	0
1102:15212:5594__S_030	Bacteria		Acidobacteria	Holophagae	Holophagales	Holophagaceae	Holophaga	uncultured Holophaga sp.	0	0	0	0	0	0	0	0	0	0	0	0	0	0	0	0	0	0	0	0	0	0	0	0	0	0	0	0	0	0	0	0	0	0	0	0	0	0	0	0	0
1102:10959:22758__S_092	Bacteria		Acidobacteria	Holophagae	Holophagales	Holophagaceae	Holophaga	uncultured Holophaga sp.	0	0	0	0	0	7	0	3	0	0	0	0	0	0	0	0	4	0	0	0	0	0	0	0	0	0	0	0	0	0	0	0	0	4	1	4	0	0	0	0	0
1102:25503:25240__S_018	Bacteria		Acidobacteria	Holophagae	Holophagales	Holophagaceae	Holophaga	uncultured Holophaga sp.	0	0	0	0	0	0	0	0	0	0	0	0	0	0	0	0	0	0	0	0	0	0	0	0	0	0	0	0	0	0	0	0	0	0	0	0	0	0	0	1	0
1103:15266:21056__S_081	Bacteria		Acidobacteria	Holophagae	Holophagales	Holophagaceae	Holophaga	uncultured Holophaga sp.	0	0	0	0	0	0	0	0	0	0	0	0	0	0	0	0	0	0	0	0	0	0	0	0	0	0	0	0	0	0	0	0	0	0	0	0	0	0	0	0	0
1104:25220:24616__S_113	Bacteria		Acidobacteria	Holophagae	Holophagales	Holophagaceae	Holophaga	uncultured Holophaga sp.	0	0	0	0	0	0	0	0	0	0	0	0	0	0	0	0	0	0	0	0	0	0	0	0	0	0	0	0	0	0	0	0	0	0	0	0	0	0	0	0	0
1101:10107:19489__S_005	Bacteria		Acidobacteria	Solibacteres	Solibacterales	Solibacteraceae	Candidatus Solibacter	uncultured Candidatus Solibacter sp.	0	0	0	0	0	3	0	0	0	0	0	0	0	0	0	0	0	0	0	0	0	0	0	0	0	0	0	0	0	0	0	0	0	0	0	0	0	0	0	0	0
1103:12405:12337__S_093	Bacteria		Acidobacteria	Solibacteres	Solibacterales	Solibacteraceae	Candidatus Solibacter	uncultured Candidatus Solibacter sp.	0	0	0	0	0	0	0	0	0	0	0	0	0	0	0	0	0	0	0	0	0	0	0	0	0	0	0	0	0	0	0	0	0	0	0	0	0	0	0	0	0
1103:19076:6470__S_066	Bacteria		Acidobacteria	Solibacteres	Solibacterales	Solibacteraceae	Candidatus Solibacter	uncultured Candidatus Solibacter sp.	0	0	0	0	0	0	0	0	0	0	0	0	0	0	0	0	0	0	0	0	0	0	0	0	0	0	0	0	1	0	0	0	0	0	0	0	0	0	0	0	0
1103:5853:14363__S_025	Bacteria		Acidobacteria	Solibacteres	Solibacterales	Solibacteraceae	Candidatus Solibacter	uncultured Candidatus Solibacter sp.	0	0	0	0	0	1	0	0	0	0	0	0	0	0	0	0	0	0	0	0	0	0	0	0	0	5	0	0	0	0	0	0	0	0	0	0	0	0	0	0	0
2102:9556:22654__R_090	Bacteria		Acidobacteria	Solibacteres	Solibacterales	Solibacteraceae	Candidatus Solibacter	uncultured Candidatus Solibacter sp.	0	0	1	0	0	0	0	0	0	0	1	0	0	0	0	0	0	0	0	0	0	0	0	0	0	0	0	0	0	0	0	0	0	0	0	0	0	0	0	0	0
1102:21314:4672__R_063	Bacteria		Acidobacteria	Solibacteres	Solibacterales	Solibacteraceae	Candidatus Solibacter	uncultured Solibacter sp.	0	0	7	1	0	0	0	0	0	0	0	0	0	0	0	0	0	0	0	0	0	0	3	0	2	0	0	0	0	0	0	2	0	2	3	0	0	9	18	0	0
1101:17906:16145__S_112	Bacteria		Acidobacteria	Solibacteres	Solibacterales	Solibacteraceae	Candidatus Solibacter		0	0	0	0	0	0	0	0	0	0	0	0	0	0	0	0	0	0	0	0	0	0	0	0	0	0	0	0	0	0	0	0	0	0	0	0	0	0	0	0	0
1101:26583:10247__S_024	Bacteria		Acidobacteria	Solibacteres	Solibacterales	Solibacteraceae	Candidatus Solibacter		0	0	0	0	0	0	0	0	0	0	0	0	0	0	0	0	2	0	0	0	0	0	0	0	0	0	2	0	0	0	0	0	0	0	0	0	0	0	0	0	0
1102:7837:10054__S_041	Bacteria		Acidobacteria	Solibacteres	Solibacterales	Solibacteraceae	Candidatus Solibacter		0	0	0	0	0	0	0	0	0	0	0	0	0	0	0	0	3	0	0	0	1	0	0	0	0	0	0	0	0	0	0	0	0	0	0	0	0	0	0	0	0
2102:9353:16561__S_045	Bacteria		Acidobacteria	Solibacteres	Solibacterales	Solibacteraceae	Candidatus Solibacter		0	0	0	0	0	0	0	0	0	0	0	0	0	0	0	0	0	0	0	0	0	0	0	0	0	0	0	0	0	0	0	0	0	0	0	0	0	0	0	0	0
2104:11581:12687__S_056	Bacteria		Acidobacteria	Solibacteres	Solibacterales	Solibacteraceae	Candidatus Solibacter		7	0	0	0	0	0	0	0	0	0	0	0	0	0	0	0	0	0	0	0	0	0	0	0	0	0	0	0	0	0	0	0	0	0	0	0	0	0	0	0	0
1101:10191:20622__S_032	Bacteria		Acidobacteria						0	0	0	0	0	0	0	0	0	0	0	0	0	0	0	0	0	0	0	0	0	0	0	0	0	0	0	0	0	0	0	0	0	0	0	0	0	0	0	0	0
1101:10428:4355__S_051	Bacteria		Acidobacteria						0	0	0	0	0	0	0	0	0	0	0	0	0	0	0	0	0	0	0	0	0	0	0	0	0	0	0	0	0	0	0	0	0	0	0	0	0	0	0	0	0
1101:10620:10643__S_088	Bacteria		Acidobacteria						0	0	0	0	0	0	0	0	0	0	0	0	0	0	0	0	0	0	0	0	0	0	0	0	0	0	0	0	0	0	0	0	0	0	0	0	0	0	0	0	0
1101:10804:10168__S_041	Bacteria		Acidobacteria						0	0	0	0	0	0	0	0	0	0	0	0	0	0	0	0	0	0	0	0	0	0	0	0	0	0	0	0	0	0	0	0	0	0	0	0	0	0	0	0	0
1101:11121:22646__S_122	Bacteria		Acidobacteria						0	0	0	0	0	0	0	0	0	0	0	0	0	0	0	0	0	0	0	0	0	0	0	0	0	0	0	0	0	0	0	0	0	0	0	0	0	0	0	0	0
1101:11593:12280__S_052	Bacteria		Acidobacteria						0	0	0	0	0	0	0	0	0	0	0	0	0	0	0	0	0	0	0	0	0	0	0	0	0	0	0	0	0	0	0	0	0	0	0	0	0	0	0	0	0
1101:11809:14440__S_017	Bacteria		Acidobacteria						0	0	0	0	0	0	0	0	0	1	0	0	0	0	0	0	0	0	0	0	0	0	3	0	0	0	0	0	0	0	0	0	0	0	0	0	0	0	0	0	3
1101:11873:17862__R_036	Bacteria		Acidobacteria						0	0	0	3	7	2	0	0	11	0	2	2	3	1	1	0	0	0	0	2	0	0	1	7	2	0	19	0	0	0	0	0	0	2	6	46	0	0	0	3	0
1101:12293:26595__S_060	Bacteria		Acidobacteria						0	0	0	0	0	0	0	0	0	0	0	0	0	0	0	0	0	0	0	0	0	0	0	0	0	0	0	0	0	0	0	0	0	0	0	0	0	0	0	0	0
1101:12320:6046__S_020	Bacteria		Acidobacteria						0	0	0	0	0	0	0	0	0	0	0	0	0	0	0	0	0	0	0	0	0	0	0	0	0	0	0	0	0	0	0	0	0	0	0	0	0	0	0	0	0
1101:13542:5319__S_025	Bacteria		Acidobacteria						0	0	0	0	0	0	0	0	0	0	0	0	0	0	0	0	0	1	0	0	0	0	0	0	0	0	0	0	0	0	0	0	0	0	0	0	0	0	0	0	0
1101:13570:28574__R_039	Bacteria		Acidobacteria						0	0	0	0	0	0	0	0	0	1	0	0	3	0	0	6	0	1	0	0	0	2	0	0	9	0	1	0	0	4	0	0	2	1	1	3	0	0	20	0	0
1101:13793:11301__S_116	Bacteria		Acidobacteria						0	0	0	0	0	3	0	0	0	0	0	0	1	0	0	0	0	0	0	0	0	0	1	0	0	0	0	0	0	0	0	0	0	0	0	0	0	0	0	0	0
1101:14074:4389__S_002	Bacteria		Acidobacteria						0	0	0	0	0	0	0	0	0	0	0	0	0	0	0	0	0	0	0	0	0	0	0	0	0	0	0	0	0	0	0	0	0	0	0	0	0	0	0	0	0
1101:14190:26814__S_119	Bacteria		Acidobacteria						0	0	0	0	0	0	0	0	0	0	0	0	0	0	0	0	0	0	0	0	0	0	0	0	0	0	0	0	0	0	0	0	0	0	0	0	0	0	0	0	0
1101:14617:19586__S_084	Bacteria		Acidobacteria						0	0	0	0	0	0	0	0	0	0	0	0	0	0	0	0	0	0	0	0	0	0	0	0	0	0	0	0	0	0	0	0	0	0	0	0	0	0	0	0	0
1101:14927:5428__S_007	Bacteria		Acidobacteria						0	0	0	0	0	0	0	0	0	0	0	0	0	0	0	0	0	0	0	0	0	0	0	0	0	0	0	0	0	0	0	0	0	0	0	0	0	0	0	0	0
1101:15137:22233__S_066	Bacteria		Acidobacteria						0	0	0	0	0	0	0	0	0	0	0	0	0	0	0	0	0	0	0	0	0	0	0	0	0	0	0	0	0	0	0	0	0	0	0	0	0	0	0	0	0
1101:16003:20429__S_020	Bacteria		Acidobacteria						0	0	0	0	0	0	0	0	0	0	0	0	0	0	0	0	0	0	0	0	0	0	0	0	0	0	0	0	0	0	0	0	0	0	0	0	0	0	0	0	0
1101:16023:7259__S_097	Bacteria		Acidobacteria						0	0	0	0	0	0	0	0	0	0	0	0	0	0	0	0	0	0	0	0	0	0	0	0	0	0	0	0	0	0	0	0	0	0	0	0	0	0	0	0	0
1101:16167:13088__S_060	Bacteria		Acidobacteria						0	0	0	0	0	0	0	0	0	0	0	0	0	0	0	0	0	0	0	0	0	0	0	0	0	0	0	0	0	0	0	0	0	0	0	0	0	0	0	0	0
1101:17443:28583__S_130	Bacteria		Acidobacteria						0	0	0	0	0	0	0	0	0	0	0	0	0	0	0	0	0	0	0	0	0	0	0	0	0	0	0	0	0	0	0	0	0	0	0	0	0	0	0	0	0
1101:17570:7699__S_012	Bacteria		Acidobacteria						0	0	0	0	0	0	0	0	0	0	0	0	0	0	0	0	0	0	0	0	0	0	0	0	0	0	0	0	0	0	0	0	0	0	0	0	0	0	0	0	0
1101:18630:28152__S_024	Bacteria		Acidobacteria						0	0	0	0	0	0	0	0	0	0	0	0	0	0	0	0	0	0	0	0	0	0	0	0	0	0	0	0	0	0	0	0	0	0	0	0	0	0	0	0	0
1101:18782:10056__S_053	Bacteria		Acidobacteria						0	0	0	0	0	0	0	0	0	0	0	0	0	0	0	0	0	0	0	0	0	0	0	0	0	0	0	0	0	0	0	0	0	0	0	0	0	0	0	0	0
1101:19927:8997__S_060	Bacteria		Acidobacteria						0	0	0	0	0	0	0	0	0	0	0	0	0	0	0	0	0	0	0	0	0	0	0	0	0	0	0	0	0	0	0	0	0	0	0	0	0	0	0	0	0
1101:20030:25139__S_100	Bacteria		Acidobacteria						0	0	0	0	0	0	0	0	0	0	0	0	0	0	0	0	0	0	0	0	0	0	0	0	0	0	0	0	0	0	0	0	0	0	0	0	0	0	0	0	0
1101:20961:9910__S_060	Bacteria		Acidobacteria						0	0	0	0	0	0	0	0	0	0	0	0	0	0	0	0	0	0	0	0	0	0	0	0	0	0	0	0	0	0	0	0	0	0	0	0	0	0	0	0	0
1101:23709:10652__S_005	Bacteria		Acidobacteria						0	0	0	0	0	0	0	0	0	0	0	0	0	0	0	0	0	0	0	0	0	0	0	0	0	0	0	0	0	0	0	0	0	0	0	0	0	0	0	0	0
1101:23826:6000__S_088	Bacteria		Acidobacteria						0	0	0	0	0	2	0	0	0	0	0	0	0	0	0	0	0	0	0	0	0	0	0	0	0	0	0	0	0	0	0	0	0	0	0	0	0	0	0	0	0
1101:24106:11442__S_100	Bacteria		Acidobacteria						0	0	0	0	0	0	0	0	0	0	0	0	0	0	0	0	0	0	0	0	0	0	0	0	0	0	0	0	0	0	0	0	0	0	0	0	0	0	0	0	0
1101:24180:17068__S_064	Bacteria		Acidobacteria						0	0	0	0	0	0	0	0	0	0	0	0	0	0	0	0	0	0	0	0	0	0	0	0	0	0	0	0	0	0	0	0	0	0	0	0	0	0	0	0	0
1101:24729:10885__S_118	Bacteria		Acidobacteria						0	0	0	0	0	0	0	0	0	0	1	0	0	0	0	0	0	0	0	0	0	0	0	0	0	0	0	0	0	0	0	0	0	0	0	0	0	0	0	0	0
1101:26283:11885__R_055	Bacteria		Acidobacteria						0	0	0	0	0	0	0	0	0	0	0	0	0	0	0	0	0	0	0	0	0	0	0	0	0	0	0	0	0	0	0	0	0	0	0	0	0	0	0	0	0
1101:6618:18104__S_038	Bacteria		Acidobacteria						0	0	0	0	0	0	0	0	0	0	0	0	0	0	0	0	0	0	0	0	0	0	0	0	0	0	0	0	0	0	0	0	0	0	0	0	0	0	0	0	0
1101:9650:22244__R_063	Bacteria		Acidobacteria						0	0	0	0	0	0	0	0	0	0	0	0	0	0	0	0	0	0	0	0	0	0	0	0	23	0	4	0	0	1	0	0	0	0	0	0	0	0	5	0	0
1102:10717:19961__S_027	Bacteria		Acidobacteria						0	0	0	0	0	0	0	0	0	0	0	0	0	0	0	0	0	0	0	0	0	0	0	0	0	0	0	0	0	0	0	0	0	0	0	0	0	0	0	0	0
1102:11089:21565__R_125	Bacteria		Acidobacteria						0	9	0	22	4	16	29	0	2	4	19	2	15	12	10	3	6	21	89	4	8	0	15	0	41	1	25	0	0	23	0	0	19	24	19	7	0	8	0	0	1
1102:12358:10942__S_037	Bacteria		Acidobacteria						0	0	0	0	0	0	0	0	0	0	0	0	0	0	0	0	0	0	0	0	0	0	0	0	0	0	0	0	0	0	0	0	0	0	0	0	0	0	0	0	0
1102:12928:28517__S_076	Bacteria		Acidobacteria						0	0	0	0	0	0	0	0	0	0	0	0	0	0	0	0	0	0	0	0	0	0	0	0	0	0	0	0	0	0	0	0	0	0	0	0	0	0	0	0	0
1102:13508:27047__S_001	Bacteria		Acidobacteria						0	0	0	0	0	0	0	5	0	0	0	0	0	0	0	0	0	0	0	0	0	0	0	0	0	0	0	0	0	0	0	0	0	0	0	0	0	0	0	0	0
1102:14313:24259__S_040	Bacteria		Acidobacteria						0	0	0	0	0	0	0	0	0	0	0	0	0	0	0	0	0	0	0	0	0	0	0	0	0	0	0	0	0	0	0	0	0	0	0	0	0	0	0	0	0
1102:16475:26124__S_062	Bacteria		Acidobacteria						0	0	0	0	0	0	0	0	0	0	0	0	0	0	0	0	0	0	0	0	0	0	0	0	0	0	0	0	0	0	0	0	0	0	0	0	0	0	0	0	0
1102:18115:19624__S_001	Bacteria		Acidobacteria						1	0	2	0	1	3	0	22	0	9	0	0	2	0	0	0	8	0	0	0	0	0	0	0	0	0	0	0	0	4	0	0	1	5	0	13	0	0	5	0	0
1102:20552:10113__S_065	Bacteria		Acidobacteria						0	0	0	0	0	0	0	0	0	0	0	0	0	0	0	0	0	0	0	0	0	0	0	0	0	0	0	0	0	0	0	0	0	0	0	0	0	0	0	0	0
1102:20834:16830__S_002	Bacteria		Acidobacteria						0	0	0	0	0	0	0	0	0	0	0	0	0	0	0	0	0	0	0	0	0	0	0	0	0	0	0	0	0	0	0	0	0	0	0	0	0	0	0	0	0
1102:22915:14108__S_111	Bacteria		Acidobacteria						0	0	0	0	0	0	0	0	0	0	0	0	0	0	0	0	0	0	0	0	0	0	0	0	0	0	0	0	0	0	0	0	0	0	0	0	0	0	0	0	0
1102:25203:13424__S_064	Bacteria		Acidobacteria						0	0	0	0	0	0	0	0	0	0	0	0	0	0	0	0	0	0	0	0	0	0	0	0	0	0	0	0	0	0	0	0	0	0	0	0	0	0	0	0	0
1102:26730:12029__S_052	Bacteria		Acidobacteria						0	0	0	0	0	0	0	0	0	0	0	0	0	0	0	0	0	0	0	0	0	0	0	0	0	0	0	0	0	0	0	0	0	0	0	0	0	0	0	0	0
1102:4245:18721__R_066	Bacteria		Acidobacteria						0	0	0	2	0	1	0	0	0	0	0	0	0	1	0	0	2	0	0	0	0	0	0	0	0	0	0	0	0	0	0	0	0	0	0	0	0	0	0	0	0
1102:6638:19298__S_113	Bacteria		Acidobacteria						0	0	0	0	0	0	0	0	0	0	0	0	0	0	0	0	0	0	0	0	0	0	0	0	0	0	0	0	0	0	0	0	0	0	0	0	0	0	0	0	0
1102:8312:13008__S_060	Bacteria		Acidobacteria						0	0	0	0	0	0	0	0	0	0	0	0	0	0	0	0	0	0	0	0	0	0	0	0	0	0	0	0	0	0	0	0	0	0	0	0	0	0	0	0	0
1101:10065:14119__S_041	Bacteria		Acidobacteria						0	0	0	0	0	0	0	0	0	0	0	0	0	0	0	0	0	0	0	0	0	0	0	0	0	0	0	0	0	0	0	0	0	0	0	0	0	0	0	0	0
1101:10542:6647__S_063	Bacteria		Acidobacteria						0	0	0	0	0	0	0	0	0	0	0	0	0	0	0	0	0	0	0	0	0	0	0	0	0	0	0	0	0	0	0	0	0	0	0	0	0	0	0	0	0
1101:13644:22340__S_062	Bacteria		Acidobacteria						0	0	0	0	0	0	0	0	0	0	0	0	0	0	0	0	0	0	0	0	0	0	0	0	0	0	0	0	0	0	0	0	0	0	0	0	0	0	0	0	0
1101:13746:17353__S_109	Bacteria		Acidobacteria						0	0	0	0	0	0	0	0	0	0	0	0	0	0	0	0	0	0	0	0	0	0	0	0	0	0	0	0	0	0	0	0	0	0	0	0	0	0	0	0	0
1101:14596:29007__S_027	Bacteria		Acidobacteria						0	0	0	0	0	0	0	0	0	0	0	0	0	0	0	0	0	0	0	0	0	0	0	0	0	0	0	0	0	0	0	0	0	0	0	0	0	0	0	0	0
1101:18008:21550__S_112	Bacteria		Acidobacteria						0	0	0	0	0	0	0	0	0	0	0	0	0	0	0	0	0	0	0	0	0	0	0	0	0	0	0	0	0	0	0	0	0	0	0	0	0	0	0	0	0
1101:18130:11277__R_006	Bacteria		Acidobacteria						0	0	0	0	0	6	0	0	0	0	0	0	0	0	0	0	8	0	0	0	0	0	0	0	0	0	11	0	0	0	0	3	0	1	0	0	0	1	0	0	0
1101:19592:20440__S_101	Bacteria		Acidobacteria						0	0	0	0	0	0	0	0	0	0	0	0	0	0	0	0	0	0	0	0	0	0	0	0	0	0	0	0	0	0	0	0	0	0	0	0	0	0	0	0	0
1101:22123:7993__S_052	Bacteria		Acidobacteria						0	0	0	0	0	0	0	0	0	0	0	0	0	0	0	0	0	0	0	0	0	0	0	0	0	0	0	0	0	0	0	0	0	0	0	0	0	0	0	0	0
1101:23780:13826__S_129	Bacteria		Acidobacteria						0	0	0	0	0	0	0	0	0	0	0	0	0	0	0	0	0	0	0	0	0	0	0	0	0	0	0	0	0	0	0	0	0	0	0	0	0	0	0	0	0
1101:24225:6951__S_086	Bacteria		Acidobacteria						0	0	0	0	0	0	1	0	0	0	0	0	0	0	0	0	0	0	0	0	0	0	0	0	0	0	0	0	0	0	0	0	0	0	0	0	0	0	0	0	0
1101:24685:12081__S_095	Bacteria		Acidobacteria						0	0	0	0	0	0	0	0	0	0	0	0	0	0	0	0	0	0	0	0	0	0	1	0	0	0	0	0	0	0	0	0	0	0	0	0	0	0	0	0	0
1101:26185:13072__S_018	Bacteria		Acidobacteria						0	0	0	0	0	0	0	0	0	0	0	0	0	0	0	0	0	0	0	0	0	0	0	0	0	0	0	0	0	0	0	0	0	0	0	0	0	0	0	0	0
1101:5486:13167__S_057	Bacteria		Acidobacteria						0	0	0	0	0	0	0	0	0	0	0	0	0	0	0	0	0	0	0	0	0	0	0	0	0	0	0	0	0	0	0	0	0	0	0	0	0	0	0	0	0
1101:9698:17927__S_096	Bacteria		Acidobacteria						0	0	0	0	0	0	0	0	0	0	0	0	0	0	0	0	0	0	0	0	0	0	0	0	0	0	0	0	0	0	0	0	0	0	0	0	0	0	0	0	0
1102:11682:5467__S_068	Bacteria		Acidobacteria						0	0	0	0	0	0	0	0	0	0	0	0	0	0	0	0	0	0	0	0	0	0	0	0	0	0	0	0	0	0	0	0	0	0	0	0	0	0	0	0	0
1102:15093:19739__S_066	Bacteria		Acidobacteria						0	0	0	0	0	0	0	0	0	0	0	0	0	0	0	0	0	0	0	0	0	0	0	0	0	0	0	0	0	0	0	0	0	0	0	0	0	0	0	0	0
1102:21123:13871__S_091	Bacteria		Acidobacteria						0	0	0	0	0	0	0	0	0	0	0	0	0	0	0	0	0	0	0	0	0	0	0	0	0	0	0	0	0	0	0	0	0	0	0	0	0	0	0	0	0
1102:21340:20495__S_070	Bacteria		Acidobacteria						0	0	0	0	0	0	0	0	0	0	0	0	0	0	0	0	0	0	0	0	0	0	0	0	0	0	0	0	0	0	0	0	0	0	0	0	0	0	0	0	0
1102:2180:12784__S_021	Bacteria		Acidobacteria						0	0	0	0	0	0	0	0	0	0	0	0	0	0	0	0	0	0	0	0	0	0	0	0	0	0	0	0	0	0	0	0	0	0	0	0	0	0	0	0	0
1102:25080:7891__S_037	Bacteria		Acidobacteria						0	0	0	0	0	0	0	0	0	0	0	0	0	0	0	0	0	0	0	0	0	0	0	0	0	0	0	0	0	0	0	0	0	0	0	0	0	0	0	0	0
1102:4354:12571__R_121	Bacteria		Acidobacteria						0	0	0	1	0	0	1	0	0	0	3	0	0	0	0	0	0	0	0	2	0	0	0	0	11	0	0	0	0	0	14	0	1	1	0	2	0	0	0	2	1
1103:13493:11447__S_018	Bacteria		Acidobacteria						0	0	0	0	0	0	0	0	0	0	0	0	0	0	0	0	0	0	0	0	0	0	0	0	0	0	0	0	0	0	0	0	0	0	0	0	0	0	0	0	0
1103:15089:7488__S_095	Bacteria		Acidobacteria						0	0	0	0	0	0	0	0	0	0	0	0	0	0	0	0	0	0	0	0	0	0	0	0	0	0	0	0	0	0	0	0	0	9	0	0	0	0	0	0	0
1103:15135:15616__S_080	Bacteria		Acidobacteria						0	0	0	0	0	0	0	0	0	0	0	0	0	0	0	0	0	0	0	0	0	0	0	0	0	0	0	0	0	0	0	0	0	0	0	0	0	0	0	0	0
1103:7883:18927__R_121	Bacteria		Acidobacteria						0	0	0	0	0	0	0	0	0	0	0	0	0	0	0	0	0	0	0	0	0	0	0	0	0	0	0	0	0	0	0	0	0	0	0	0	0	0	0	0	0
1104:11084:13965__S_090	Bacteria		Acidobacteria						0	0	0	0	0	0	0	0	0	0	0	0	0	0	0	0	0	0	0	0	0	0	0	0	0	0	0	0	0	0	0	0	0	0	0	0	0	0	0	0	0
1104:18516:10963__S_058	Bacteria		Acidobacteria						0	0	0	0	0	0	0	0	0	0	0	0	0	0	0	0	0	0	0	0	0	0	0	0	0	0	0	0	0	0	0	0	0	0	0	0	0	0	0	0	0
1104:24109:14562__R_127	Bacteria		Acidobacteria						0	0	0	0	0	0	0	0	0	0	0	0	0	0	0	0	0	0	0	0	0	0	0	0	0	0	0	0	0	0	0	0	0	0	0	0	0	0	0	5	0
1104:24810:9995__S_034	Bacteria		Acidobacteria						0	0	1	0	0	0	0	0	0	0	0	0	0	0	1	0	0	0	0	0	0	0	0	0	0	0	1	0	0	0	0	0	0	0	0	0	0	0	0	0	3
1104:6654:18057__S_064	Bacteria		Acidobacteria						0	0	0	0	0	0	0	0	0	0	0	0	0	0	0	0	0	0	0	0	0	0	0	0	0	0	0	0	0	0	0	0	0	0	0	0	0	0	0	0	0
1104:6717:25004__S_120	Bacteria		Acidobacteria						0	0	0	0	0	0	0	0	0	0	0	0	0	0	0	0	0	0	0	0	0	0	0	0	0	0	0	0	0	0	0	0	0	0	0	0	0	0	0	0	0
1104:8584:18198__S_090	Bacteria		Acidobacteria						0	0	0	0	0	0	0	0	0	0	0	0	0	0	0	0	0	0	0	0	0	0	0	0	0	0	0	0	0	0	0	0	0	0	0	0	0	0	0	0	0
2101:10553:6452__S_069	Bacteria		Acidobacteria						0	0	0	0	0	0	0	0	0	0	0	0	0	0	0	0	0	0	0	0	0	0	0	0	0	0	0	0	0	0	0	0	0	0	0	0	0	0	0	0	0
2101:14205:19442__S_058	Bacteria		Acidobacteria						0	0	0	0	0	0	0	0	0	0	0	0	0	0	0	0	0	0	0	0	0	0	0	0	0	0	0	0	0	0	0	0	0	0	0	0	0	0	0	0	0
2101:18055:14817__R_016	Bacteria		Acidobacteria						0	0	3	0	1	0	0	0	0	0	0	0	0	0	1	7	0	0	0	0	0	0	0	0	0	0	0	0	0	0	0	0	0	0	0	0	0	0	0	0	0
2101:18396:22592__S_008	Bacteria		Acidobacteria						0	0	0	0	0	0	0	0	0	0	0	0	0	0	0	0	0	0	0	0	0	0	0	0	0	0	0	0	0	0	0	0	0	0	0	0	0	0	0	0	0
2101:19253:8620__S_043	Bacteria		Acidobacteria						0	0	0	0	0	0	0	0	0	0	0	0	0	0	0	0	0	0	0	0	0	0	0	0	0	0	0	0	0	0	0	0	0	0	0	0	0	0	0	0	0
2101:19760:25435__S_041	Bacteria		Acidobacteria						0	0	0	0	0	0	0	0	0	0	0	0	0	0	0	0	0	0	0	0	0	0	0	0	0	0	0	0	0	0	0	0	1	0	0	0	0	0	0	0	0
2101:26059:21361__S_059	Bacteria		Acidobacteria						0	0	0	0	0	0	0	0	0	0	0	0	0	0	0	0	0	0	0	0	0	0	0	0	0	0	0	0	0	0	0	0	6	0	0	0	0	0	0	0	0
2101:26471:19501__S_031	Bacteria		Acidobacteria						0	0	0	0	0	0	0	0	0	0	0	0	0	0	0	0	0	0	0	0	0	0	0	0	0	0	0	0	0	0	0	0	1	0	0	0	0	0	0	0	0
2101:27242:19499__S_028	Bacteria		Acidobacteria						0	0	0	0	0	0	0	0	0	0	0	0	0	0	0	0	0	0	0	0	0	0	0	0	0	0	0	0	0	0	0	0	0	0	0	0	0	0	0	0	0
2102:17328:16963__S_035	Bacteria		Acidobacteria						0	0	0	0	0	0	0	0	0	0	0	0	0	0	0	0	0	0	0	0	0	0	0	0	0	0	0	0	0	0	0	0	0	0	0	0	0	0	0	0	0
2102:20567:12184__S_046	Bacteria		Acidobacteria						0	0	0	0	0	0	0	0	0	0	0	0	0	0	0	0	0	0	0	0	0	0	0	0	0	0	0	0	0	0	0	0	0	0	0	0	0	0	0	0	0
2102:21864:10168__S_060	Bacteria		Acidobacteria						0	0	0	0	0	0	0	0	0	0	0	0	0	0	0	0	0	0	0	0	0	0	0	0	2	0	0	0	0	0	0	0	0	0	0	0	0	0	0	0	0
2102:28439:14506__S_034	Bacteria		Acidobacteria						0	0	0	0	0	0	0	0	0	0	0	0	0	0	0	0	0	0	0	0	0	0	0	0	0	0	0	0	0	0	0	0	0	0	0	0	0	0	0	0	0
2102:3009:12337__S_059	Bacteria		Acidobacteria						0	0	0	0	0	0	0	0	0	0	0	0	0	0	0	0	0	0	0	0	0	0	0	0	0	0	0	0	0	0	0	0	0	0	0	0	0	0	0	0	0
2103:13232:15403__S_081	Bacteria		Acidobacteria						0	0	0	0	0	0	0	0	0	0	0	0	0	0	0	0	0	0	0	0	0	0	0	0	0	0	0	0	0	0	0	0	0	0	0	0	0	0	0	0	0
2104:18823:7294__S_098	Bacteria		Acidobacteria						0	0	0	0	0	0	0	0	0	0	0	0	0	0	0	0	0	0	0	0	0	0	0	0	0	0	0	0	0	0	0	0	0	0	0	0	0	0	0	0	0
2104:21857:22426__S_094	Bacteria		Acidobacteria						0	0	0	0	0	0	0	0	0	0	0	0	0	0	0	0	0	0	0	0	0	0	0	0	0	0	0	0	0	0	0	0	0	0	0	0	0	0	0	0	0
2104:26288:10227__S_046	Bacteria		Acidobacteria						0	0	0	0	0	0	0	0	0	0	0	0	0	0	0	0	0	0	0	0	0	0	0	0	0	0	0	0	0	0	0	0	0	0	0	0	0	0	0	0	0
2104:28286:14442__S_112	Bacteria		Acidobacteria						0	0	0	0	0	0	0	0	0	0	0	0	0	0	0	0	0	0	0	0	0	0	0	0	0	0	0	0	0	0	0	0	0	0	0	0	0	0	0	0	0
2104:6164:9255__S_097	Bacteria		Acidobacteria						0	0	0	0	0	0	0	0	0	0	0	0	0	0	0	0	0	0	0	0	0	0	0	0	0	0	0	0	0	0	0	0	0	0	0	0	0	0	0	0	0
2104:7487:13219__S_044	Bacteria		Acidobacteria						0	0	0	0	0	0	0	0	0	0	0	0	0	0	0	0	0	0	0	0	0	0	0	0	0	0	0	0	0	0	0	0	0	0	0	0	0	0	0	0	0
1101:10202:7572__S_103	Bacteria		Actinobacteria	Acidimicrobiia	Acidimicrobiales	Acidimicrobiaceae	Aciditerrimonas	uncultured Aciditerrimonas sp.	0	0	0	6	0	0	0	0	0	0	0	1	0	0	0	0	0	0	19	0	0	0	0	0	0	0	0	0	0	0	0	0	0	0	0	0	0	0	0	0	0
1101:25639:23638__S_087	Bacteria		Actinobacteria	Acidimicrobiia	Acidimicrobiales	Acidimicrobiaceae	Aciditerrimonas	uncultured Aciditerrimonas sp.	0	0	0	0	0	0	0	0	0	0	0	0	0	0	0	0	0	0	0	0	0	0	0	0	0	0	0	0	0	0	0	0	0	0	0	0	0	0	0	0	0
1101:28340:12753__S_074	Bacteria		Actinobacteria	Acidimicrobiia	Acidimicrobiales	Acidimicrobiaceae	Aciditerrimonas	uncultured Aciditerrimonas sp.	0	0	0	0	0	0	0	0	0	0	0	0	0	0	0	0	0	0	0	0	0	0	0	0	0	0	0	0	0	0	0	0	0	0	0	0	0	0	0	0	0
1101:5657:14643__S_101	Bacteria		Actinobacteria	Acidimicrobiia	Acidimicrobiales	Acidimicrobiaceae	Aciditerrimonas	uncultured Aciditerrimonas sp.	0	0	0	0	0	0	0	0	0	0	0	0	0	0	0	0	0	0	0	0	0	0	0	0	0	0	0	0	0	0	0	0	0	0	0	0	0	0	0	0	0
1102:25099:13899__S_044	Bacteria		Actinobacteria	Acidimicrobiia	Acidimicrobiales	Acidimicrobiaceae	Aciditerrimonas	uncultured Aciditerrimonas sp.	0	0	0	0	1	0	0	1	0	0	0	0	0	0	0	0	0	0	0	0	0	0	0	0	0	0	0	0	0	0	0	0	0	0	0	0	0	0	0	0	0
1102:4738:12727__S_006	Bacteria		Actinobacteria	Acidimicrobiia	Acidimicrobiales	Acidimicrobiaceae	Aciditerrimonas	uncultured Aciditerrimonas sp.	0	0	0	0	0	0	0	0	0	0	0	0	0	0	0	0	0	0	0	0	0	0	0	0	0	0	0	0	0	0	0	0	0	0	0	0	0	0	0	0	0
1101:16410:20694__S_027	Bacteria		Actinobacteria	Acidimicrobiia	Acidimicrobiales	Acidimicrobiaceae	Aciditerrimonas	uncultured Aciditerrimonas sp.	0	0	0	0	0	0	0	0	0	0	0	0	0	0	0	0	0	0	0	0	0	0	0	0	0	0	0	0	0	0	0	0	0	0	0	0	0	0	0	0	0
1101:24786:9378__R_030	Bacteria		Actinobacteria	Acidimicrobiia	Acidimicrobiales	Acidimicrobiaceae	Aciditerrimonas	uncultured Aciditerrimonas sp.	0	0	0	0	0	0	0	0	0	0	0	0	0	0	0	0	0	0	0	0	0	0	0	0	0	0	0	0	0	5	0	0	0	0	0	0	0	0	0	0	0
1102:12524:27150__S_075	Bacteria		Actinobacteria	Acidimicrobiia	Acidimicrobiales	Acidimicrobiaceae	Aciditerrimonas	uncultured Aciditerrimonas sp.	0	0	0	0	0	0	0	0	0	0	0	0	0	0	0	0	0	0	0	0	0	0	0	0	0	0	0	0	0	2	0	0	0	0	0	0	0	0	0	0	0
1102:12632:24873__R_106	Bacteria		Actinobacteria	Acidimicrobiia	Acidimicrobiales	Acidimicrobiaceae	Aciditerrimonas	uncultured Aciditerrimonas sp.	0	0	0	0	0	0	0	0	0	0	0	0	0	0	0	0	0	0	0	0	0	0	0	0	0	0	0	0	0	0	0	0	0	0	0	0	0	0	0	0	0
1103:5310:15447__S_056	Bacteria		Actinobacteria	Acidimicrobiia	Acidimicrobiales	Acidimicrobiaceae	Aciditerrimonas	uncultured Aciditerrimonas sp.	0	0	0	0	0	0	0	0	0	0	0	0	0	0	0	0	0	0	0	0	0	0	0	0	0	0	0	0	0	0	0	0	0	0	0	0	0	0	0	0	0
1104:15714:21631__S_103	Bacteria		Actinobacteria	Acidimicrobiia	Acidimicrobiales	Acidimicrobiaceae	Aciditerrimonas	uncultured Aciditerrimonas sp.	0	0	0	0	0	0	0	0	0	0	0	0	0	0	0	0	0	0	0	0	0	0	0	0	0	0	0	0	0	0	0	0	0	0	0	0	0	0	0	0	0
2101:20765:14799__S_079	Bacteria		Actinobacteria	Acidimicrobiia	Acidimicrobiales	Acidimicrobiaceae	Aciditerrimonas	uncultured Aciditerrimonas sp.	0	0	0	0	0	0	0	0	0	0	0	0	0	0	0	0	0	0	0	0	0	0	0	0	0	0	0	0	0	0	0	0	0	0	0	0	0	0	0	0	0
1101:14335:23039__S_057	Bacteria		Actinobacteria	Acidimicrobiia	Acidimicrobiales	Acidimicrobiaceae	Ilumatobacter	uncultured Ilumatobacter sp.	0	0	0	0	0	0	0	0	0	0	0	0	0	0	0	0	0	0	0	0	0	0	0	0	0	0	0	0	0	0	0	0	0	0	0	0	0	0	0	0	0
1101:27402:19109__R_001	Bacteria		Actinobacteria	Acidimicrobiia	Acidimicrobiales	Acidimicrobiaceae	Ilumatobacter	uncultured Ilumatobacter sp.	16	0	1	0	0	1	0	0	0	1	0	0	1	0	3	0	4	1	0	0	1	0	8	0	0	0	0	4	0	2	0	0	0	0	0	0	0	0	2	0	7
1101:12936:21593__S_026	Bacteria		Actinobacteria	Acidimicrobiia	Acidimicrobiales	Acidimicrobiaceae			0	0	0	0	0	0	0	0	0	0	0	0	0	0	0	0	0	0	0	0	0	0	1	0	0	0	0	0	0	0	0	0	0	0	0	0	0	0	0	0	0
1101:15076:17921__S_024	Bacteria		Actinobacteria	Acidimicrobiia	Acidimicrobiales	Acidimicrobiaceae			0	0	0	0	0	0	0	0	0	0	0	0	0	0	0	0	0	0	0	0	0	0	0	0	0	0	0	0	0	0	0	0	0	0	0	0	0	0	0	0	0
1101:15431:18491__S_109	Bacteria		Actinobacteria	Acidimicrobiia	Acidimicrobiales	Acidimicrobiaceae			0	0	0	0	0	0	0	0	0	0	0	0	0	0	0	0	0	0	0	0	0	0	0	0	0	0	0	0	0	0	0	0	0	0	0	0	0	0	0	0	0
1101:19263:6332__S_027	Bacteria		Actinobacteria	Acidimicrobiia	Acidimicrobiales	Acidimicrobiaceae			0	0	0	0	0	0	0	0	0	0	1	0	0	0	0	0	0	0	0	0	0	0	0	0	0	0	0	0	0	8	0	0	0	0	0	0	0	0	0	0	0
1101:20458:19611__R_117	Bacteria		Actinobacteria	Acidimicrobiia	Acidimicrobiales	Acidimicrobiaceae			0	0	0	0	0	0	0	0	0	0	0	0	0	0	0	0	0	0	0	0	0	0	0	0	0	0	0	0	0	0	0	0	0	0	0	0	0	0	0	0	0
1101:24529:16185__R_127	Bacteria		Actinobacteria	Acidimicrobiia	Acidimicrobiales	Acidimicrobiaceae			0	0	0	0	0	0	0	0	0	0	0	0	0	0	0	0	0	0	0	0	0	0	0	0	0	0	0	0	0	0	0	0	0	0	0	0	0	0	0	0	0
1101:9778:11904__S_102	Bacteria		Actinobacteria	Acidimicrobiia	Acidimicrobiales	Acidimicrobiaceae			0	0	0	0	0	0	0	0	0	0	0	0	0	0	0	0	0	0	0	0	0	0	0	0	0	0	0	0	0	0	0	1	0	0	0	0	0	0	0	0	0
1102:12118:26009__S_024	Bacteria		Actinobacteria	Acidimicrobiia	Acidimicrobiales	Acidimicrobiaceae			0	0	0	0	0	0	0	0	0	0	0	0	0	0	0	0	0	0	0	0	0	0	0	0	4	0	0	0	0	0	0	0	0	0	0	0	0	0	0	0	0
1102:18053:5412__R_102	Bacteria		Actinobacteria	Acidimicrobiia	Acidimicrobiales	Acidimicrobiaceae			0	0	1	0	0	4	0	0	0	0	0	0	0	1	0	0	2	0	0	0	0	0	0	0	0	10	0	0	0	0	0	0	0	0	0	0	0	0	0	0	1
1101:13873:9170__S_040	Bacteria		Actinobacteria	Acidimicrobiia	Acidimicrobiales	Acidimicrobiaceae			0	0	0	0	0	0	0	0	0	0	0	0	0	0	0	0	0	0	0	0	0	0	0	0	0	0	0	0	0	0	0	0	0	0	0	0	0	0	0	0	0
1101:14249:26814__S_006	Bacteria		Actinobacteria	Acidimicrobiia	Acidimicrobiales	Acidimicrobiaceae			6	0	0	0	0	0	0	0	0	0	1	0	0	0	0	0	0	0	0	0	0	0	0	0	0	0	0	0	0	0	0	0	0	0	0	0	0	0	0	0	0
1101:14369:1412__R_080	Bacteria		Actinobacteria	Acidimicrobiia	Acidimicrobiales	Acidimicrobiaceae			0	13	0	2	0	5	0	0	0	0	0	0	0	0	0	0	1	0	0	0	0	0	0	0	0	0	0	11	0	0	0	0	0	0	0	0	0	0	0	13	0
1101:14403:22883__S_008	Bacteria		Actinobacteria	Acidimicrobiia	Acidimicrobiales	Acidimicrobiaceae			0	0	0	0	0	0	0	0	0	0	0	0	0	0	0	0	0	0	0	0	0	0	0	0	0	0	0	0	0	0	0	0	0	0	0	0	0	0	0	0	0
1102:25018:23631__S_016	Bacteria		Actinobacteria	Acidimicrobiia	Acidimicrobiales	Acidimicrobiaceae			0	0	0	0	0	0	0	0	0	0	0	0	0	0	0	0	0	0	0	0	0	0	0	0	0	0	0	0	0	0	0	0	0	0	0	0	0	0	0	0	0
1104:16455:19389__S_067	Bacteria		Actinobacteria	Acidimicrobiia	Acidimicrobiales	Acidimicrobiaceae			0	0	0	0	0	0	0	0	0	0	0	0	0	0	0	0	0	0	0	0	0	0	0	0	0	0	0	0	0	0	0	0	0	0	0	0	0	0	0	0	0
1104:8671:24039__S_108	Bacteria		Actinobacteria	Acidimicrobiia	Acidimicrobiales	Acidimicrobiaceae			0	0	0	0	0	0	0	0	0	0	0	0	0	0	0	0	0	0	0	0	0	0	0	0	0	0	0	0	0	0	0	0	0	0	0	0	0	0	0	0	0
2101:16083:6411__S_105	Bacteria		Actinobacteria	Acidimicrobiia	Acidimicrobiales	Acidimicrobiaceae			0	0	0	0	0	0	0	0	0	0	0	0	0	0	0	0	0	0	17	0	0	0	0	0	0	0	0	0	0	0	0	0	0	0	0	0	0	0	0	0	0
1101:3445:21326__S_012	Bacteria		Actinobacteria	Acidimicrobiia	Acidimicrobiales	Iamiaceae	Iamia	uncultured Iamia sp.	0	0	0	0	0	0	0	0	0	0	3	0	0	0	0	0	0	0	0	0	1	0	0	0	0	0	0	0	0	5	0	0	0	0	0	0	0	0	0	0	1
2101:15693:3250__S_063	Bacteria		Actinobacteria	Acidimicrobiia	Acidimicrobiales	Iamiaceae	Iamia	uncultured Iamia sp.	0	0	0	0	0	0	0	0	0	0	0	0	0	0	0	0	0	0	0	0	0	0	0	0	0	0	0	0	0	0	0	0	0	0	0	0	0	0	0	0	0
1101:24703:13458__S_005	Bacteria		Actinobacteria	Acidimicrobiia	Acidimicrobiales				0	0	0	0	0	0	0	0	0	0	0	0	0	0	0	0	0	0	0	0	0	0	0	0	0	0	0	0	0	0	0	0	0	0	0	0	0	0	0	0	0
1102:12002:10666__S_024	Bacteria		Actinobacteria	Acidimicrobiia	Acidimicrobiales				0	0	0	0	0	0	0	0	0	0	0	0	0	0	0	0	0	0	0	0	0	0	0	0	0	0	0	0	0	0	0	0	0	0	0	0	0	0	0	0	0
1102:13532:5114__R_041	Bacteria		Actinobacteria	Acidimicrobiia	Acidimicrobiales				0	0	0	0	0	0	0	0	0	0	0	1	0	0	0	0	0	0	0	0	0	0	0	0	0	0	0	0	0	0	0	0	0	0	0	0	0	0	0	0	4
1102:6922:13579__S_122	Bacteria		Actinobacteria	Acidimicrobiia	Acidimicrobiales				0	0	0	0	0	0	0	0	0	0	0	0	0	0	0	0	0	0	0	0	0	0	0	0	0	0	0	0	0	0	0	0	0	0	0	0	0	0	0	0	0
1102:8333:12137__R_115	Bacteria		Actinobacteria	Acidimicrobiia	Acidimicrobiales				0	2	0	0	3	1	0	0	4	0	0	0	0	0	0	0	0	0	0	0	0	0	1	0	0	9	0	0	0	0	0	0	0	0	4	0	0	0	0	0	0
1101:19515:6723__S_005	Bacteria		Actinobacteria	Acidimicrobiia	Acidimicrobiales				0	0	0	0	0	0	0	0	0	0	0	0	0	0	0	0	0	0	0	0	0	0	0	0	0	0	0	0	0	0	0	0	0	0	0	0	0	0	0	0	0
1103:20976:19849__S_025	Bacteria		Actinobacteria	Acidimicrobiia	Acidimicrobiales				0	0	0	0	0	0	0	0	0	0	0	0	0	0	0	0	0	0	0	0	0	0	0	0	0	0	0	0	0	0	0	0	0	0	0	0	0	0	0	0	0
1103:23196:10456__S_062	Bacteria		Actinobacteria	Acidimicrobiia	Acidimicrobiales				0	0	0	0	0	0	0	0	0	0	0	0	0	0	0	0	0	0	0	0	0	0	0	0	0	0	0	0	0	0	0	0	0	0	0	0	0	0	0	0	0
2101:11530:9302__S_042	Bacteria		Actinobacteria	Acidimicrobiia	Acidimicrobiales				0	0	0	0	0	0	0	0	0	0	0	0	0	0	0	0	0	0	0	0	0	0	0	0	0	0	0	0	0	0	0	0	0	0	0	0	0	0	0	0	0
2101:14417:22083__R_016	Bacteria		Actinobacteria	Acidimicrobiia	Acidimicrobiales				0	0	0	0	0	0	0	0	0	0	0	0	0	0	0	10	0	0	0	0	0	0	0	0	0	0	0	0	0	0	0	0	0	0	0	0	0	0	0	0	0
2103:25891:10325__S_012	Bacteria		Actinobacteria	Acidimicrobiia	Acidimicrobiales				0	0	0	0	0	0	0	0	0	0	0	0	0	0	0	0	0	0	0	0	0	0	0	0	0	0	0	0	0	0	0	0	0	0	0	0	0	0	0	0	0
2104:10698:5684__R_072	Bacteria		Actinobacteria	Acidimicrobiia	Acidimicrobiales				0	0	0	0	0	0	0	0	0	0	0	0	0	0	0	0	0	0	0	0	0	0	0	0	0	0	0	0	0	0	0	0	0	0	0	0	0	0	0	0	0
1101:10493:13828__R_049	Bacteria		Actinobacteria	Actinobacteria	Catenulisporales	Actinospicaceae	Actinospica		378	84	25	175	178	115	64	118	3	5	174	5	18	26	66	8	80	130	354	42	36	2	72	366	111	106	284	65	1	52	0	30	47	31	13	5	2	225	32	9	76
1102:7363:11298__R_058	Bacteria		Actinobacteria	Actinobacteria	Catenulisporales	Actinospicaceae	Actinospica		0	0	0	0	0	0	0	1	0	0	0	0	0	0	0	0	0	0	0	0	0	0	0	0	0	0	0	0	0	0	0	0	0	0	0	0	0	1	0	0	0
1101:11867:27408__S_088	Bacteria		Actinobacteria	Actinobacteria	Catenulisporales	Actinospicaceae			0	0	0	0	0	0	0	0	0	0	0	0	0	0	0	0	0	0	0	0	0	0	0	0	0	0	0	0	0	0	0	0	0	0	0	0	0	0	0	0	0
1101:19459:27525__S_109	Bacteria		Actinobacteria	Actinobacteria	Catenulisporales	Actinospicaceae			0	0	0	0	0	0	0	0	0	0	0	0	0	0	0	0	0	0	0	0	0	0	0	0	1	0	0	1	0	0	0	0	0	0	0	0	0	0	0	0	1
1102:5490:13887__R_066	Bacteria		Actinobacteria	Actinobacteria	Catenulisporales	Actinospicaceae			0	0	0	0	0	1	2	0	0	0	1	0	0	0	0	0	1	0	0	0	0	0	2	0	0	0	0	1	0	0	0	0	0	0	0	0	0	0	0	0	0
1101:10386:5574__R_025	Bacteria		Actinobacteria	Actinobacteria	Catenulisporales	Actinospicaceae			0	0	0	0	0	0	0	0	0	0	0	0	0	0	0	0	0	0	0	0	0	0	0	0	1	0	0	1	0	1	0	0	0	0	0	0	0	0	0	0	0
1101:11261:6538__R_080	Bacteria		Actinobacteria	Actinobacteria	Catenulisporales	Actinospicaceae			113	95	4	56	8	82	57	1	25	3	36	9	40	4	60	27	46	35	103	56	14	86	66	271	162	64	82	244	5	72	0	10	88	14	94	46	1	95	200	0	63
1102:9852:23917__R_094	Bacteria		Actinobacteria	Actinobacteria	Catenulisporales	Actinospicaceae			1	0	0	1	1	4	8	1	0	0	0	1	2	0	4	1	3	0	3	2	0	0	2	4	5	2	10	1	0	3	0	1	1	1	0	3	0	2	1	0	5
2101:26664:13011__S_076	Bacteria		Actinobacteria	Actinobacteria	Catenulisporales	Actinospicaceae			0	0	0	0	0	0	0	0	0	0	0	0	0	0	0	0	0	0	0	0	0	0	0	0	0	0	0	0	0	0	0	0	0	0	0	0	0	0	0	0	0
2104:25003:14557__S_096	Bacteria		Actinobacteria	Actinobacteria	Catenulisporales	Actinospicaceae			0	0	0	0	0	1	0	0	0	0	0	0	0	0	0	0	0	0	0	0	0	0	0	0	0	0	0	0	0	0	0	0	0	0	0	0	0	0	0	0	0
1101:11189:7216__R_001	Bacteria		Actinobacteria	Actinobacteria	Catenulisporales	Catenulisporaceae	Catenulispora		246	17	14	16	18	4	7	0	17	1	22	4	25	12	11	10	8	7	18	0	5	12	62	20	40	37	57	15	0	84	28	4	78	14	33	22	13	74	54	58	114
1101:14300:14593__R_112	Bacteria		Actinobacteria	Actinobacteria	Catenulisporales	Catenulisporaceae	Catenulispora		3	0	0	1	0	2	0	0	0	0	0	0	0	0	0	0	0	0	0	0	0	0	3	0	0	0	0	0	0	1	0	0	3	1	0	0	0	1	0	0	2
1101:17445:18771__R_025	Bacteria		Actinobacteria	Actinobacteria	Catenulisporales	Catenulisporaceae	Catenulispora		9	19	33	6	29	23	25	6	4	5	22	7	29	17	18	10	42	26	13	31	3	2	53	2	128	13	31	37	2	20	0	11	5	20	21	14	2	10	69	3	24
1102:10182:11773__S_016	Bacteria		Actinobacteria	Actinobacteria	Catenulisporales	Catenulisporaceae	Catenulispora		6	2	0	6	2	8	34	0	1	9	14	2	2	2	0	0	0	1	4	4	7	9	18	0	3	1	29	0	1	18	0	0	40	1	13	1	0	33	4	0	11
1102:13044:9976__R_030	Bacteria		Actinobacteria	Actinobacteria	Catenulisporales	Catenulisporaceae	Catenulispora		0	0	0	0	0	0	0	0	0	0	0	0	0	0	0	0	0	0	0	0	0	0	0	0	0	0	0	0	0	1	0	0	0	0	0	0	0	0	1	0	1
1102:17687:21422__S_090	Bacteria		Actinobacteria	Actinobacteria	Catenulisporales	Catenulisporaceae	Catenulispora		13	44	12	11	9	2	71	2	10	0	16	4	11	0	2	0	2	0	17	2	0	0	4	0	2	0	19	4	0	4	0	0	0	2	1	5	0	8	0	0	1
1102:4193:14580__R_071	Bacteria		Actinobacteria	Actinobacteria	Catenulisporales	Catenulisporaceae	Catenulispora		1	0	0	1	0	0	0	0	0	0	0	0	0	0	1	0	0	0	0	0	0	0	0	0	0	0	0	0	0	0	0	0	2	0	0	0	0	0	0	0	0
1102:14963:18103__S_025	Bacteria		Actinobacteria	Actinobacteria	Catenulisporales	Catenulisporaceae	Catenulispora		0	0	0	0	0	0	1	0	0	0	1	0	0	0	0	0	0	0	0	0	0	0	0	0	0	0	2	0	0	0	0	0	0	0	0	0	0	0	0	0	0
1102:20131:13174__R_010	Bacteria		Actinobacteria	Actinobacteria	Catenulisporales	Catenulisporaceae	Catenulispora		0	1	0	0	0	1	0	0	0	1	0	0	0	0	0	0	0	1	0	0	0	0	0	0	0	0	1	0	0	0	0	0	0	0	0	0	0	0	1	0	0
2103:22559:19657__S_068	Bacteria		Actinobacteria	Actinobacteria	Catenulisporales	Catenulisporaceae	Catenulispora		1	1	0	0	1	0	0	0	0	0	0	1	0	0	1	0	0	0	1	0	0	0	1	0	0	1	0	10	0	0	1	0	0	0	1	0	0	0	1	0	1
2103:28328:20776__S_014	Bacteria		Actinobacteria	Actinobacteria	Catenulisporales	Catenulisporaceae	Catenulispora		0	0	0	0	0	0	0	0	0	0	0	0	0	0	0	0	1	0	0	0	0	0	0	0	2	0	0	0	0	0	0	0	0	0	0	0	0	0	0	0	0
2104:25395:16290__R_001	Bacteria		Actinobacteria	Actinobacteria	Catenulisporales	Catenulisporaceae	Catenulispora		1	0	0	0	0	0	0	0	0	0	0	0	0	0	0	0	0	0	1	0	0	0	0	0	0	1	0	1	0	1	0	0	0	0	0	0	0	1	0	0	2
2101:21947:8908__R_001	Bacteria		Actinobacteria	Actinobacteria	Catenulisporales				1	0	0	0	0	0	0	0	0	0	0	0	0	0	0	0	0	0	0	0	0	0	0	0	0	0	0	1	0	1	0	0	1	0	0	0	0	0	0	0	2
1101:13134:9599__S_089	Bacteria		Actinobacteria	Actinobacteria	Corynebacteriales	Mycobacteriaceae	Mycobacterium		0	0	0	2	4	0	0	0	1	0	3	0	1	1	0	0	2	1	0	0	0	0	0	0	0	0	2	1	0	0	0	0	0	7	0	4	0	0	0	0	1
1101:13566:15436__R_065	Bacteria		Actinobacteria	Actinobacteria	Corynebacteriales	Mycobacteriaceae	Mycobacterium		27	61	1	5	19	7	1	6	0	3	19	3	5	3	18	2	33	24	16	0	13	2	22	74	23	21	48	2	1	29	2	25	25	8	39	21	4	18	12	10	110
1101:16568:9063__R_008	Bacteria		Actinobacteria	Actinobacteria	Corynebacteriales	Mycobacteriaceae	Mycobacterium		11	8	49	31	14	18	13	152	7	34	9	5	15	20	22	60	40	10	3	0	6	1	0	0	6	38	16	2	2	9	0	4	29	4	2	61	5	20	9	121	5
1101:23220:5264__S_002	Bacteria		Actinobacteria	Actinobacteria	Corynebacteriales	Mycobacteriaceae	Mycobacterium		0	0	0	0	0	0	0	0	0	0	0	0	0	0	0	0	0	0	0	0	0	0	0	0	0	0	0	0	0	0	0	0	0	0	0	0	0	0	0	0	0
1101:28094:9639__R_002	Bacteria		Actinobacteria	Actinobacteria	Corynebacteriales	Mycobacteriaceae	Mycobacterium		0	1	0	0	0	0	0	0	0	0	0	0	0	0	0	0	0	3	0	1	0	0	0	0	0	3	0	0	0	0	0	1	0	0	0	0	0	0	0	0	0
1102:20835:12339__S_096	Bacteria		Actinobacteria	Actinobacteria	Corynebacteriales	Mycobacteriaceae	Mycobacterium		0	0	0	0	4	2	0	0	0	0	0	0	0	1	0	0	1	4	2	0	0	11	0	0	9	0	1	0	1	0	0	0	0	0	0	0	0	0	0	6	0
1101:20617:10235__S_097	Bacteria		Actinobacteria	Actinobacteria	Corynebacteriales	Mycobacteriaceae	Mycobacterium		0	0	1	3	1	0	1	0	0	0	2	0	0	0	1	0	6	0	0	0	0	0	0	0	0	1	0	0	0	0	0	0	0	0	1	2	0	4	0	0	0
2101:10518:21045__R_040	Bacteria		Actinobacteria	Actinobacteria	Corynebacteriales	Mycobacteriaceae	Mycobacterium		0	0	1	1	0	0	1	0	0	0	0	0	0	0	0	0	0	0	0	0	0	0	0	0	0	0	0	0	0	0	0	0	0	0	0	1	0	0	0	1	0
2101:14678:23573__R_064	Bacteria		Actinobacteria	Actinobacteria	Corynebacteriales	Mycobacteriaceae	Mycobacterium		1	0	0	0	0	0	0	0	0	0	0	0	2	0	0	0	0	0	0	0	0	0	0	0	0	0	0	0	0	0	0	0	0	0	0	1	0	0	0	0	0
1101:13384:8223__R_057	Bacteria		Actinobacteria	Actinobacteria	Corynebacteriales	Nocardiaceae	Nocardia		14	4	9	15	2	18	10	0	0	21	10	0	5	1	4	0	0	1	0	0	1	0	0	33	0	9	8	3	0	1	0	0	21	19	16	2	3	4	0	0	0
1102:15222:8062__S_082	Bacteria		Actinobacteria	Actinobacteria	Corynebacteriales	Nocardiaceae	Nocardia		0	0	0	0	0	1	0	0	0	0	0	0	0	0	0	0	0	0	0	0	0	0	0	0	0	0	0	0	0	0	0	0	0	0	0	0	0	1	0	0	0
1102:10052:21489__R_034	Bacteria		Actinobacteria	Actinobacteria	Corynebacteriales	Nocardiaceae	Nocardia		21	13	118	2	438	87	21	24	0	43	161	121	23	40	0	0	0	0	0	20	0	0	58	0	0	0	7	0	0	14	0	0	0	506	0	0	0	0	0	0	8
1103:24425:11721__R_065	Bacteria		Actinobacteria	Actinobacteria	Corynebacteriales	Nocardiaceae	Nocardia		0	2	1	6	0	2	0	0	0	1	1	3	6	0	0	2	1	1	0	0	0	0	0	0	0	0	0	4	0	0	0	0	21	0	0	11	0	1	0	0	0
2101:17386:10712__R_104	Bacteria		Actinobacteria	Actinobacteria	Corynebacteriales	Nocardiaceae	Nocardia		0	0	0	0	0	0	1	0	0	0	0	0	0	0	0	0	0	0	0	0	0	0	0	0	0	0	0	0	0	0	0	0	2	0	0	0	0	0	0	0	0
2101:17540:18788__S_130	Bacteria		Actinobacteria	Actinobacteria	Corynebacteriales	Nocardiaceae	Nocardia		0	0	0	0	0	0	0	0	0	0	0	0	0	0	0	0	0	0	0	0	0	0	0	0	0	0	0	0	0	0	0	0	0	0	0	0	0	0	0	0	0
2102:13529:20573__R_057	Bacteria		Actinobacteria	Actinobacteria	Corynebacteriales	Nocardiaceae	Nocardia		8	1	51	1	0	1	2	1	0	1	1	0	1	11	6	0	0	3	0	0	1	0	0	0	0	0	12	0	0	1	0	0	27	0	0	87	0	10	0	1	9
2104:11217:4549__R_034	Bacteria		Actinobacteria	Actinobacteria	Corynebacteriales	Nocardiaceae	Nocardia		0	0	2	0	7	5	1	0	0	2	5	2	0	0	0	0	0	0	0	0	0	0	1	0	0	0	0	0	0	0	0	0	0	10	0	0	0	0	0	0	0
2104:7711:19679__R_091	Bacteria		Actinobacteria	Actinobacteria	Corynebacteriales	Nocardiaceae	Nocardia		0	0	2	0	0	0	0	0	0	0	0	0	0	0	0	0	0	0	0	0	0	0	0	0	0	0	1	0	0	0	0	0	0	0	0	2	0	1	0	0	1
1101:14728:6189__R_104	Bacteria		Actinobacteria	Actinobacteria	Corynebacteriales	Nocardiaceae	Rhodococcus		0	0	0	1	0	0	0	0	0	0	0	0	0	0	0	0	0	0	0	0	0	0	0	0	0	0	0	0	0	0	0	0	0	0	0	0	0	0	0	0	0
1101:9255:10120__R_005	Bacteria		Actinobacteria	Actinobacteria	Corynebacteriales	Nocardiaceae	Rhodococcus		0	0	0	0	7	0	0	1	3	3	0	0	0	0	2	0	0	0	0	0	0	0	0	0	0	0	0	0	0	0	0	0	0	0	0	0	0	0	0	0	0
1103:17405:8192__S_074	Bacteria		Actinobacteria	Actinobacteria	Corynebacteriales	Nocardiaceae	Rhodococcus		0	0	0	0	0	0	0	0	0	0	0	0	0	0	0	0	0	0	0	0	0	0	0	0	0	0	0	0	0	0	0	0	0	0	5	0	0	0	0	0	0
1101:12112:5623__R_102	Bacteria		Actinobacteria	Actinobacteria	Corynebacteriales				0	0	0	0	0	0	0	0	0	0	0	0	0	0	0	0	0	0	0	0	0	0	0	0	0	0	0	0	0	0	0	0	0	0	0	0	0	0	0	0	0
1101:21831:27788__R_088	Bacteria		Actinobacteria	Actinobacteria	Corynebacteriales				0	0	0	0	0	0	0	0	0	0	0	0	0	0	0	0	0	0	0	3	0	0	0	0	0	0	0	0	0	0	0	0	0	0	0	0	0	0	0	4	0
2104:11864:2594__S_033	Bacteria		Actinobacteria	Actinobacteria	Frankiales	Frankiaceae	Frankia		2	0	0	0	1	0	0	0	0	0	0	0	0	0	0	0	0	0	0	0	1	0	0	0	0	0	0	0	0	0	0	0	0	0	0	4	0	3	0	0	0
1101:10992:17477__S_089	Bacteria		Actinobacteria	Actinobacteria	Geodermatophilales	Geodermatophilaceae			0	0	0	0	0	0	0	0	0	0	0	0	0	0	0	0	0	0	0	0	0	0	0	0	0	0	0	0	0	0	0	0	0	0	0	0	0	0	0	0	0
1101:19335:5662__S_096	Bacteria		Actinobacteria	Actinobacteria	Geodermatophilales	Geodermatophilaceae			0	0	0	0	0	0	0	0	0	0	0	0	0	0	0	0	0	0	0	0	0	0	0	0	0	0	0	0	0	0	0	0	0	0	0	0	0	0	0	0	0
1101:8273:21043__R_002	Bacteria		Actinobacteria	Actinobacteria	Geodermatophilales	Geodermatophilaceae			0	21	0	6	2	0	3	0	0	0	1	0	0	2	3	0	0	0	0	0	0	0	0	0	0	2	1	0	0	6	0	10	0	0	0	0	0	0	0	0	0
1102:10883:10114__S_017	Bacteria		Actinobacteria	Actinobacteria	Geodermatophilales	Geodermatophilaceae			0	0	0	0	0	0	0	0	0	0	0	0	0	0	0	0	0	0	0	0	0	0	0	0	0	0	0	0	0	1	0	0	0	0	0	0	0	0	0	0	0
1101:9127:12842__S_111	Bacteria		Actinobacteria	Actinobacteria	Geodermatophilales	Geodermatophilaceae			0	0	0	0	0	0	0	0	0	0	0	0	0	0	0	0	0	0	0	0	0	0	0	0	0	0	0	0	0	0	0	0	0	0	0	0	0	0	0	0	0
1102:10883:19180__S_039	Bacteria		Actinobacteria	Actinobacteria	Geodermatophilales	Geodermatophilaceae			0	0	0	0	0	0	0	0	0	0	0	0	0	0	0	0	0	0	0	0	0	0	0	0	0	0	0	0	0	5	0	0	0	0	0	0	0	0	0	0	0
1102:14593:12156__S_096	Bacteria		Actinobacteria	Actinobacteria	Geodermatophilales	Geodermatophilaceae			4	0	0	0	5	1	0	2	0	0	0	0	0	2	0	0	0	0	0	0	0	0	0	6	0	0	0	0	0	0	0	2	0	0	0	0	0	0	6	0	1
1102:4670:20657__S_006	Bacteria		Actinobacteria	Actinobacteria	Geodermatophilales	Geodermatophilaceae			0	0	0	0	0	0	0	0	0	0	0	0	0	0	0	0	0	0	0	0	0	0	0	0	0	0	0	0	0	0	0	0	0	0	0	0	0	0	0	0	0
1103:9522:9177__R_055	Bacteria		Actinobacteria	Actinobacteria	Geodermatophilales	Geodermatophilaceae			11	4	6	7	4	8	1	3	0	5	7	0	1	3	0	3	0	0	4	0	1	0	3	3	14	0	0	0	0	8	0	1	1	3	5	1	0	1	0	0	2
1104:20990:7848__S_095	Bacteria		Actinobacteria	Actinobacteria	Geodermatophilales	Geodermatophilaceae			0	0	0	0	0	0	0	0	0	0	0	0	0	0	0	0	0	0	0	0	0	0	0	0	0	0	0	0	0	0	0	0	0	0	0	0	0	0	1	0	0
1104:8892:6535__S_124	Bacteria		Actinobacteria	Actinobacteria	Geodermatophilales	Geodermatophilaceae			0	0	0	0	0	0	0	0	0	0	0	0	2	0	0	0	0	0	0	0	0	0	0	0	0	0	0	0	0	0	0	0	0	0	0	0	0	0	0	0	0
2102:16443:9164__R_109	Bacteria		Actinobacteria	Actinobacteria	Geodermatophilales	Geodermatophilaceae			0	0	0	0	0	0	0	0	0	0	0	0	0	0	0	0	0	0	0	0	0	0	0	0	0	0	0	0	0	0	0	0	0	0	0	0	0	0	0	0	0
1101:20894:14535__R_127	Bacteria		Actinobacteria	Actinobacteria	Kineosporiales	Kineosporiaceae			0	0	4	0	0	3	0	0	1	0	2	0	0	7	0	0	0	0	0	4	0	6	0	0	0	0	0	0	0	0	0	0	0	1	0	0	0	0	0	0	2
2101:24161:16056__R_123	Bacteria		Actinobacteria	Actinobacteria	Micrococcales	Dermacoccaceae			0	0	0	0	0	0	0	0	0	0	0	0	0	0	0	0	0	0	0	0	0	0	0	0	0	0	0	0	0	0	0	0	0	0	0	0	0	0	0	0	0
1104:27177:9193__R_066	Bacteria		Actinobacteria	Actinobacteria	Micrococcales	Intrasporangiaceae	Phycicoccus		0	0	0	0	8	0	0	0	0	3	0	0	1	0	1	7	0	0	0	0	0	7	0	1	0	0	0	0	0	0	0	0	2	0	0	0	0	0	0	0	0
1103:12655:22143__R_125	Bacteria		Actinobacteria	Actinobacteria	Micrococcales	Intrasporangiaceae	Terrabacter		1	5	0	0	15	4	1	0	0	0	1	0	0	0	2	15	3	0	0	0	0	0	0	0	0	0	0	0	0	3	0	0	0	0	0	0	0	0	0	0	2
1101:22172:18245__R_042	Bacteria		Actinobacteria	Actinobacteria	Micrococcales	Intrasporangiaceae			0	0	0	0	0	0	0	0	1	1	0	0	1	0	2	0	0	0	0	0	0	0	0	0	0	0	0	0	0	0	0	0	0	0	0	0	0	0	0	0	0
1101:27744:17439__S_119	Bacteria		Actinobacteria	Actinobacteria	Micrococcales	Intrasporangiaceae			0	0	0	0	0	1	0	0	0	0	0	0	0	1	0	0	0	0	0	0	0	0	1	0	0	0	0	0	0	0	0	0	0	0	0	0	0	0	0	0	0
1102:12195:7396__R_089	Bacteria		Actinobacteria	Actinobacteria	Micrococcales	Intrasporangiaceae			0	0	0	0	2	3	4	1	3	0	2	0	5	1	6	4	1	0	1	0	1	4	0	0	1	4	0	0	1	2	0	1	0	0	1	12	0	0	0	4	0
1102:14455:16652__S_014	Bacteria		Actinobacteria	Actinobacteria	Micrococcales	Intrasporangiaceae			0	0	0	0	0	0	0	0	1	0	0	0	0	0	0	0	0	0	0	0	0	0	0	0	0	0	0	0	0	0	0	0	0	0	0	0	0	0	0	0	0
1104:10967:25005__S_100	Bacteria		Actinobacteria	Actinobacteria	Micrococcales	Intrasporangiaceae			0	0	0	0	0	1	0	0	0	1	0	0	0	0	0	3	0	0	0	0	0	0	0	0	0	1	5	0	0	0	0	0	0	0	3	0	0	0	0	0	0
2101:16215:8478__S_068	Bacteria		Actinobacteria	Actinobacteria	Micrococcales	Intrasporangiaceae			2	0	0	0	7	0	2	0	0	0	0	0	1	2	16	0	0	0	0	0	0	0	0	0	0	0	0	0	0	0	0	0	0	0	0	0	0	0	0	4	0
2103:18288:17053__R_016	Bacteria		Actinobacteria	Actinobacteria	Micrococcales	Intrasporangiaceae			0	0	0	0	1	0	0	0	0	0	0	0	0	0	0	2	0	0	0	0	0	0	0	0	0	0	0	0	0	0	0	0	0	0	0	1	0	0	0	0	0
2104:9310:10404__S_006	Bacteria		Actinobacteria	Actinobacteria	Micrococcales	Microbacteriaceae	Amnibacterium		0	0	0	0	0	0	0	0	0	0	0	0	0	0	0	0	0	0	0	0	0	0	0	0	0	0	0	0	0	0	0	0	0	0	0	0	0	0	0	0	0
1101:18289:7791__R_048	Bacteria		Actinobacteria	Actinobacteria	Micrococcales	Microbacteriaceae	Leifsonia		49	0	2	33	41	10	17	0	9	18	8	4	9	76	104	12	9	41	0	1	25	0	23	0	17	0	20	0	1	28	0	11	47	3	12	51	0	1	0	4	10
1101:5387:12140__R_040	Bacteria		Actinobacteria	Actinobacteria	Micrococcales	Microbacteriaceae	Microbacterium		1	0	0	0	0	0	0	2	0	0	0	0	0	2	4	1	0	0	6	0	0	0	0	0	0	0	0	0	0	0	0	0	0	0	0	1	0	0	0	6	0
1101:14663:25029__S_061	Bacteria		Actinobacteria	Actinobacteria	Micrococcales	Microbacteriaceae			0	0	0	2	0	0	0	0	0	0	0	0	0	0	0	0	0	0	0	0	0	0	0	0	0	0	0	0	0	0	0	0	0	0	0	0	0	0	0	0	0
1101:21717:5305__S_040	Bacteria		Actinobacteria	Actinobacteria	Micrococcales	Microbacteriaceae			2	0	0	5	1	3	0	0	0	1	0	0	0	2	0	0	0	0	0	0	4	1	0	0	0	0	10	0	0	0	0	0	0	1	0	0	0	1	0	0	0
1102:7812:26286__R_102	Bacteria		Actinobacteria	Actinobacteria	Micrococcales	Microbacteriaceae			0	0	0	2	0	0	1	0	0	0	0	0	0	0	0	0	0	0	0	0	0	0	0	0	0	0	0	0	0	0	0	0	0	0	0	0	0	0	0	0	0
1101:16293:19559__S_090	Bacteria		Actinobacteria	Actinobacteria	Micrococcales	Microbacteriaceae			0	0	0	0	0	0	0	0	0	0	0	0	0	0	0	0	0	0	0	0	0	0	0	0	0	0	0	0	0	0	0	0	0	0	0	0	0	0	0	0	0
1101:20404:24886__R_123	Bacteria		Actinobacteria	Actinobacteria	Micrococcales	Microbacteriaceae			0	0	0	0	0	0	0	0	0	0	0	0	0	0	0	0	0	0	0	0	0	0	0	0	0	0	0	0	0	0	0	0	0	0	0	0	0	0	0	0	0
1103:13201:19192__S_071	Bacteria		Actinobacteria	Actinobacteria	Micrococcales	Microbacteriaceae			0	0	0	0	0	0	4	0	0	0	0	0	0	0	0	0	0	0	0	0	0	0	0	0	0	0	0	0	0	0	0	0	0	0	0	0	0	0	0	0	0
1104:19984:22455__R_046	Bacteria		Actinobacteria	Actinobacteria	Micrococcales	Microbacteriaceae			0	0	0	0	0	0	0	0	0	0	0	0	0	0	0	0	1	0	0	0	0	0	0	0	0	0	0	0	0	4	0	0	0	0	0	1	0	0	0	0	0
2101:8650:17550__R_025	Bacteria		Actinobacteria	Actinobacteria	Micrococcales	Microbacteriaceae			0	0	0	0	0	0	0	0	0	0	0	0	0	0	0	0	0	0	0	0	0	0	0	0	3	0	0	0	0	0	0	0	0	0	0	0	0	0	0	0	0
1101:20205:25286__S_072	Bacteria		Actinobacteria	Actinobacteria	Micrococcales	Micrococcaceae			5	0	4	1	0	1	0	0	0	0	0	0	0	1	0	0	0	0	0	0	0	0	0	0	0	0	0	0	0	0	0	0	0	0	0	0	0	0	0	0	0
1102:12334:18532__S_021	Bacteria		Actinobacteria	Actinobacteria	Micrococcales	Micrococcaceae			0	0	1	0	9	0	0	0	0	1	0	0	0	0	0	0	0	0	0	0	0	0	0	0	0	0	0	0	0	0	0	0	0	0	0	0	0	0	0	0	0
1102:27781:17255__S_013	Bacteria		Actinobacteria	Actinobacteria	Micrococcales				0	0	0	0	0	0	0	0	0	0	0	0	0	0	0	0	0	0	0	0	0	0	0	0	0	0	0	0	0	0	0	0	0	0	0	0	0	0	0	0	0
1102:7837:24559__R_072	Bacteria		Actinobacteria	Actinobacteria	Micrococcales				0	0	0	0	0	0	0	0	1	0	0	0	0	0	1	0	0	1	0	0	0	0	0	0	0	0	0	0	0	0	0	0	0	0	0	0	0	0	0	0	0
1104:11050:14825__R_048	Bacteria		Actinobacteria	Actinobacteria	Micrococcales				0	0	0	1	0	0	0	0	0	0	0	0	1	0	0	0	0	0	0	0	0	0	1	0	1	0	0	0	0	0	0	0	1	0	0	0	0	0	0	0	0
1101:11927:23341__R_003	Bacteria		Actinobacteria	Actinobacteria	Micromonosporales	Micromonosporaceae	Actinoplanes		1	1	1	0	0	2	0	3	1	0	0	0	2	1	0	3	1	0	0	0	0	0	0	0	0	0	0	0	0	0	0	1	0	2	0	0	0	0	0	2	0
1103:10834:7758__R_003	Bacteria		Actinobacteria	Actinobacteria	Micromonosporales	Micromonosporaceae	Actinoplanes		198	114	550	23	39	50	28	238	37	5	72	21	57	85	73	126	144	43	49	11	4	18	14	0	26	1	17	1	19	25	0	55	16	48	48	15	7	67	14	103	90
1103:9622:18453__R_113	Bacteria		Actinobacteria	Actinobacteria	Micromonosporales	Micromonosporaceae	Actinoplanes		0	0	0	0	0	0	0	0	0	0	0	0	0	1	0	0	0	0	0	0	0	0	0	0	0	0	0	0	0	0	0	0	0	0	0	0	0	0	0	0	0
1102:23560:7861__S_030	Bacteria		Actinobacteria	Actinobacteria	Micromonosporales	Micromonosporaceae	Dactylosporangium	uncultured Dactylosporangium sp.	0	0	0	0	0	0	0	0	0	0	0	0	0	0	0	0	0	0	0	0	0	0	0	0	0	0	0	0	0	0	0	0	0	0	0	0	2	0	0	0	0
1101:11674:7128__R_040	Bacteria		Actinobacteria	Actinobacteria	Micromonosporales	Micromonosporaceae	Dactylosporangium		0	0	1	0	0	3	0	0	2	0	0	0	1	0	4	27	10	0	0	0	1	1	0	0	0	2	0	0	2	0	0	0	0	2	0	5	1	0	0	71	0
1104:24670:16363__R_016	Bacteria		Actinobacteria	Actinobacteria	Micromonosporales	Micromonosporaceae	Micromonospora		0	0	0	0	0	1	0	0	0	0	0	0	0	2	0	17	0	1	2	0	0	1	0	0	0	0	0	0	0	13	0	0	0	0	0	0	0	0	0	2	0
1101:10447:13431__R_025	Bacteria		Actinobacteria	Actinobacteria	Micromonosporales	Micromonosporaceae			11	2	10	23	46	19	29	1	3	6	32	0	23	23	31	19	26	8	16	13	10	6	3	49	90	3	67	0	3	47	0	42	52	15	1	2	0	80	5	0	48
1101:14705:21617__R_042	Bacteria		Actinobacteria	Actinobacteria	Micromonosporales	Micromonosporaceae			2	1	8	4	2	0	2	3	1	0	4	0	5	0	5	33	8	2	0	0	5	0	1	0	4	0	5	0	2	1	0	1	7	0	0	1	0	0	1	6	2
1101:20511:11869__R_005	Bacteria		Actinobacteria	Actinobacteria	Micromonosporales	Micromonosporaceae			0	0	2	0	1	0	0	1	0	0	1	0	1	0	0	0	0	0	0	0	0	0	0	0	0	0	0	0	0	0	0	0	0	2	0	0	0	0	0	1	0
1101:28036:14754__R_016	Bacteria		Actinobacteria	Actinobacteria	Micromonosporales	Micromonosporaceae			1	0	0	1	0	4	2	0	0	0	0	0	3	0	0	2	4	0	0	0	0	0	1	0	1	0	1	0	0	2	0	0	0	1	0	3	0	1	0	0	2
1101:5749:11275__S_097	Bacteria		Actinobacteria	Actinobacteria	Micromonosporales	Micromonosporaceae			0	0	0	0	0	0	0	0	0	0	0	0	0	0	0	0	0	0	0	0	0	0	0	0	0	0	0	0	0	0	0	0	0	0	0	0	0	0	0	0	0
1102:13603:14112__S_090	Bacteria		Actinobacteria	Actinobacteria	Micromonosporales	Micromonosporaceae			0	0	0	0	0	0	0	0	0	0	0	0	0	0	0	0	0	0	0	0	0	0	0	0	0	0	0	0	0	0	0	0	0	0	0	0	0	0	0	0	0
1102:22345:12484__R_112	Bacteria		Actinobacteria	Actinobacteria	Micromonosporales	Micromonosporaceae			0	0	0	0	0	0	0	0	0	0	2	0	0	0	0	0	1	0	0	0	0	0	0	0	0	0	0	0	1	0	0	0	0	0	0	1	0	0	0	0	0
1102:23843:10410__R_107	Bacteria		Actinobacteria	Actinobacteria	Micromonosporales	Micromonosporaceae			0	0	0	0	0	0	0	0	0	0	0	0	0	0	0	0	0	0	0	0	0	0	0	0	0	0	0	0	0	0	0	0	0	0	0	0	0	0	0	0	0
1102:24073:8604__R_052	Bacteria		Actinobacteria	Actinobacteria	Micromonosporales	Micromonosporaceae			0	6	28	0	0	1	0	1	0	0	0	0	24	0	0	40	0	0	0	0	0	0	2	0	0	0	0	0	0	0	0	0	0	0	0	37	0	0	0	4	0
1101:15551:25408__S_096	Bacteria		Actinobacteria	Actinobacteria	Micromonosporales	Micromonosporaceae			0	0	0	0	0	0	0	0	0	0	0	0	0	0	0	0	0	0	0	0	0	0	0	0	0	0	0	0	0	0	0	0	0	0	0	0	0	0	0	0	0
1101:4336:20388__R_032	Bacteria		Actinobacteria	Actinobacteria	Micromonosporales	Micromonosporaceae			41	11	134	9	17	13	9	64	19	6	5	3	18	24	7	92	74	1	4	0	10	0	16	0	0	0	0	0	3	0	0	62	6	8	9	3	1	4	0	43	8
1102:26969:15770__R_048	Bacteria		Actinobacteria	Actinobacteria	Micromonosporales	Micromonosporaceae			0	0	3	0	0	0	0	0	0	0	0	0	5	0	0	1	0	0	0	0	0	0	0	0	0	0	0	0	0	0	0	0	0	0	0	1	0	0	0	0	0
1104:16415:2600__S_066	Bacteria		Actinobacteria	Actinobacteria	Micromonosporales	Micromonosporaceae			0	0	0	0	0	0	0	0	0	0	0	0	0	0	0	0	0	0	0	0	0	0	0	0	0	0	0	0	0	0	0	0	0	0	0	0	0	0	0	0	0
1104:19541:4817__S_060	Bacteria		Actinobacteria	Actinobacteria	Micromonosporales	Micromonosporaceae			0	0	0	0	0	0	0	0	0	0	0	0	0	0	0	0	0	0	0	0	0	0	0	0	0	0	0	0	0	0	0	0	0	0	0	0	0	0	0	0	0
1104:23420:11211__S_126	Bacteria		Actinobacteria	Actinobacteria	Micromonosporales	Micromonosporaceae			0	0	0	0	0	0	0	4	0	0	0	0	0	0	0	0	0	0	0	0	0	0	0	0	0	0	0	0	0	0	0	0	0	5	0	0	0	0	0	0	0
2101:26306:16674__R_013	Bacteria		Actinobacteria	Actinobacteria	Micromonosporales	Micromonosporaceae			0	0	0	2	0	0	4	0	0	0	0	0	1	0	0	0	0	0	0	0	0	0	0	0	0	1	0	0	0	0	0	0	0	0	0	0	0	0	0	0	0
2102:20843:25621__R_017	Bacteria		Actinobacteria	Actinobacteria	Micromonosporales	Micromonosporaceae			0	1	2	4	2	2	2	0	0	2	4	1	10	1	1	3	14	0	1	0	0	2	1	0	1	1	2	0	0	0	0	0	1	5	2	3	0	0	0	0	3
2102:6829:11550__S_002	Bacteria		Actinobacteria	Actinobacteria	Micromonosporales	Micromonosporaceae			0	0	0	0	0	0	0	0	0	0	0	0	0	0	0	0	0	0	0	0	0	0	0	0	0	0	0	0	0	0	0	0	0	0	0	0	0	0	0	0	0
2103:20616:10549__S_054	Bacteria		Actinobacteria	Actinobacteria	Micromonosporales	Micromonosporaceae			0	0	0	0	0	0	0	0	0	0	0	0	0	0	0	0	0	0	0	0	0	0	0	0	0	0	0	0	0	0	0	0	0	0	0	0	0	0	0	0	0
2104:16765:26634__R_090	Bacteria		Actinobacteria	Actinobacteria	Micromonosporales	Micromonosporaceae			1	6	6	86	16	57	46	0	0	10	13	1	65	7	3	29	87	8	22	11	24	26	15	12	35	9	51	0	7	10	0	12	24	17	20	48	0	2	4	6	26
2104:6060:6489__R_003	Bacteria		Actinobacteria	Actinobacteria	Micromonosporales	Micromonosporaceae			0	0	2	0	0	0	0	0	0	0	0	0	0	0	0	0	0	0	0	0	0	0	0	0	0	0	0	0	0	0	0	0	0	0	0	0	0	0	0	0	0
1101:6730:12233__R_055	Bacteria		Actinobacteria	Actinobacteria	Nakamurellales	Nakamurellaceae	Nakamurella		0	0	0	0	1	0	0	0	0	0	0	0	0	0	0	0	0	0	0	0	0	0	0	0	0	0	0	0	0	0	0	0	0	0	0	0	0	0	0	0	0
1101:15888:4833__R_102	Bacteria		Actinobacteria	Actinobacteria	Nakamurellales	Nakamurellaceae	Nakamurella		0	0	0	0	0	0	0	0	0	0	0	0	0	0	0	0	0	0	0	0	0	0	0	0	0	0	0	0	0	0	0	0	0	0	0	0	0	0	0	0	0
1103:25178:13992__R_096	Bacteria		Actinobacteria	Actinobacteria	Propionibacteriales	Nocardioidaceae	Kribbella		22	0	5	8	2	19	2	20	5	8	2	1	31	4	5	77	46	0	34	0	13	2	0	0	0	11	0	0	5	32	0	0	10	4	2	47	5	0	0	16	0
1101:13616:25710__R_104	Bacteria		Actinobacteria	Actinobacteria	Propionibacteriales	Nocardioidaceae	Nocardioides		0	0	0	0	0	0	0	0	0	0	0	0	0	3	0	0	0	0	0	0	0	3	0	0	4	0	2	0	1	0	0	0	0	0	0	3	0	0	0	0	0
1101:27143:20493__S_041	Bacteria		Actinobacteria	Actinobacteria	Propionibacteriales	Nocardioidaceae	Nocardioides		0	0	0	0	0	0	0	0	0	0	0	0	0	0	0	0	0	0	0	0	0	0	0	0	0	0	0	0	0	0	0	0	0	0	0	0	0	0	0	0	0
1101:17812:19847__R_099	Bacteria		Actinobacteria	Actinobacteria	Propionibacteriales	Nocardioidaceae	Nocardioides		0	0	0	0	0	0	0	0	0	0	0	0	0	0	0	0	0	0	0	0	0	0	0	0	0	0	0	0	0	0	0	0	0	0	0	0	0	0	0	0	0
1103:12729:25096__R_115	Bacteria		Actinobacteria	Actinobacteria	Propionibacteriales	Nocardioidaceae	Nocardioides		0	0	0	0	0	0	0	0	0	0	0	0	0	0	0	0	0	0	0	0	0	0	0	0	0	0	0	0	0	0	0	0	0	0	0	0	0	0	0	0	0
1103:2647:15319__S_061	Bacteria		Actinobacteria	Actinobacteria	Propionibacteriales	Nocardioidaceae	Nocardioides		0	2	1	0	1	7	16	0	6	0	2	0	1	0	3	9	0	0	3	0	0	0	0	0	0	0	2	0	0	1	0	0	0	6	7	1	1	2	16	0	1
2102:9548:21830__S_017	Bacteria		Actinobacteria	Actinobacteria	Propionibacteriales	Nocardioidaceae	Nocardioides		0	0	0	0	0	0	0	0	0	0	0	0	0	0	0	1	0	0	0	0	0	0	0	0	0	0	0	0	0	0	0	0	0	0	0	0	0	0	1	0	1
2103:5483:7535__R_033	Bacteria		Actinobacteria	Actinobacteria	Propionibacteriales	Nocardioidaceae	Nocardioides		0	0	0	0	0	0	1	0	0	0	1	0	0	0	3	0	0	0	0	0	0	0	0	0	0	0	0	0	0	0	0	0	8	0	0	1	0	0	0	0	0
2104:15388:13241__S_021	Bacteria		Actinobacteria	Actinobacteria	Propionibacteriales	Nocardioidaceae	Nocardioides		1	0	0	0	0	0	0	0	0	0	0	0	0	0	0	0	0	0	0	0	0	0	0	0	0	0	0	0	0	0	0	0	0	0	0	0	0	0	0	0	0
1101:20577:5203__R_102	Bacteria		Actinobacteria	Actinobacteria	Propionibacteriales	Nocardioidaceae			0	0	0	4	0	0	0	0	0	0	12	0	0	1	2	0	0	0	0	0	3	0	0	0	4	0	0	0	0	0	0	0	2	0	0	3	0	0	10	0	0
1102:12119:28554__S_028	Bacteria		Actinobacteria	Actinobacteria	Propionibacteriales	Nocardioidaceae			0	0	0	1	0	0	0	0	0	0	0	0	0	0	0	0	0	0	0	0	0	0	0	0	0	0	0	0	0	0	0	0	0	0	0	0	0	0	0	4	0
1101:8701:24591__S_050	Bacteria		Actinobacteria	Actinobacteria	Propionibacteriales	Nocardioidaceae			0	0	0	0	0	0	0	0	0	0	0	0	0	0	0	0	0	0	0	0	0	0	0	0	0	0	0	0	0	0	0	0	0	0	0	0	0	0	0	0	0
1101:8883:24127__S_037	Bacteria		Actinobacteria	Actinobacteria	Propionibacteriales	Nocardioidaceae			0	0	0	0	0	0	0	0	0	0	0	0	0	0	0	0	0	0	0	0	0	0	0	0	0	0	0	0	0	0	0	0	0	0	0	0	0	0	0	0	0
2102:10289:11262__R_048	Bacteria		Actinobacteria	Actinobacteria	Pseudonocardiales	Pseudonocardiaceae	Amycolatopsis		0	14	1	13	6	0	17	0	6	5	2	6	30	0	28	0	106	0	0	4	1	1	9	0	4	0	7	0	1	0	0	0	38	17	1	29	0	0	15	11	2
1101:10525:4416__R_030	Bacteria		Actinobacteria	Actinobacteria	Pseudonocardiales	Pseudonocardiaceae	Kutzneria		1	0	0	3	3	6	11	0	5	0	12	18	5	0	6	0	10	1	60	4	1	14	41	92	37	32	18	9	6	95	0	14	26	20	6	9	1	24	11	0	1
1104:14171:18498__R_063	Bacteria		Actinobacteria	Actinobacteria	Pseudonocardiales	Pseudonocardiaceae	Pseudonocardia	uncultured Pseudonocardia sp.	0	0	0	0	5	0	0	0	0	0	0	0	1	0	0	0	0	0	0	0	0	0	4	0	0	0	0	0	0	0	0	0	0	0	0	0	0	0	0	0	0
2102:27378:12243__R_025	Bacteria		Actinobacteria	Actinobacteria	Pseudonocardiales	Pseudonocardiaceae	Pseudonocardia	uncultured Pseudonocardia sp.	1	0	3	2	1	0	2	5	0	1	13	0	3	2	0	37	0	0	0	1	0	0	3	0	41	6	3	0	0	13	0	0	0	8	0	1	1	0	0	3	0
1102:14205:4959__S_055	Bacteria		Actinobacteria	Actinobacteria	Pseudonocardiales	Pseudonocardiaceae	Pseudonocardia		0	0	2	0	3	0	0	0	0	2	0	0	0	5	0	0	0	0	0	0	0	0	0	0	0	0	2	0	0	0	0	0	0	0	0	0	0	0	0	0	0
2102:11082:7882__S_130	Bacteria		Actinobacteria	Actinobacteria	Pseudonocardiales	Pseudonocardiaceae	Pseudonocardia		0	0	0	0	0	0	0	0	0	0	0	0	0	0	0	0	0	0	0	0	0	0	0	0	0	0	0	0	0	0	0	0	0	0	0	0	0	0	0	0	0
2104:25226:9555__S_010	Bacteria		Actinobacteria	Actinobacteria	Pseudonocardiales	Pseudonocardiaceae	Pseudonocardia		0	0	0	0	0	0	0	0	0	0	0	0	0	0	0	0	0	0	0	0	0	0	0	0	0	0	0	0	0	0	0	0	0	0	0	0	0	0	0	0	0
1101:11702:6479__R_065	Bacteria		Actinobacteria	Actinobacteria	Pseudonocardiales	Pseudonocardiaceae			0	0	0	0	0	0	0	0	0	0	0	0	0	0	0	0	0	0	0	0	0	0	0	0	0	0	0	0	0	0	0	0	0	0	0	0	0	0	0	0	0
1101:11890:14946__S_007	Bacteria		Actinobacteria	Actinobacteria	Pseudonocardiales	Pseudonocardiaceae			0	0	0	0	1	0	0	0	0	0	0	0	0	0	2	0	6	0	0	0	0	0	0	0	0	0	1	0	0	0	0	0	0	0	0	0	0	0	0	0	10
1101:13406:16635__R_036	Bacteria		Actinobacteria	Actinobacteria	Pseudonocardiales	Pseudonocardiaceae			0	0	0	0	0	5	0	0	0	0	3	1	27	0	0	87	69	0	0	0	12	3	0	3	0	27	0	0	4	4	0	0	0	0	0	147	0	3	0	0	1
1101:27189:10778__S_090	Bacteria		Actinobacteria	Actinobacteria	Pseudonocardiales	Pseudonocardiaceae			0	0	0	0	0	0	0	0	0	0	0	0	0	0	0	0	0	0	0	0	0	0	0	0	0	0	0	0	0	0	0	0	0	0	0	0	0	0	0	0	0
1101:7396:13528__R_112	Bacteria		Actinobacteria	Actinobacteria	Pseudonocardiales	Pseudonocardiaceae			0	0	0	0	0	0	0	0	0	0	0	0	0	0	0	0	0	0	0	0	0	0	0	0	0	0	0	0	0	0	0	0	0	0	0	0	0	0	0	0	0
1102:11052:16508__S_035	Bacteria		Actinobacteria	Actinobacteria	Pseudonocardiales	Pseudonocardiaceae			0	0	0	0	0	0	0	0	0	0	0	0	0	0	0	0	0	0	0	0	0	0	0	0	0	0	0	0	0	0	0	0	0	0	0	0	0	0	0	0	0
1102:8463:10913__S_048	Bacteria		Actinobacteria	Actinobacteria	Pseudonocardiales	Pseudonocardiaceae			0	0	0	0	0	0	0	0	0	0	0	0	0	0	0	0	0	0	0	0	0	0	0	0	0	0	0	0	0	0	0	0	0	0	0	0	0	0	0	0	0
1102:10697:26710__S_005	Bacteria		Actinobacteria	Actinobacteria	Streptomycetales	Streptomycetaceae	Streptomyces	uncultured Streptomyces sp.	0	0	0	0	0	0	0	0	0	0	0	0	1	0	0	0	0	0	0	0	0	0	0	0	0	0	0	0	0	0	0	0	0	0	0	0	0	0	0	0	0
1101:11132:14452__S_064	Bacteria		Actinobacteria	Actinobacteria	Streptomycetales	Streptomycetaceae	Streptomyces		0	0	1	0	0	0	0	0	1	0	1	0	1	0	0	0	0	0	0	0	0	0	0	0	0	0	0	1	0	0	0	1	0	0	0	0	0	1	0	0	0
1101:12540:24374__S_027	Bacteria		Actinobacteria	Actinobacteria	Streptomycetales	Streptomycetaceae	Streptomyces		0	0	0	0	0	0	0	0	1	0	0	0	0	0	0	0	0	0	0	0	0	0	0	0	0	0	0	0	0	0	0	0	0	0	0	0	0	0	0	0	0
1101:12924:13811__R_046	Bacteria		Actinobacteria	Actinobacteria	Streptomycetales	Streptomycetaceae	Streptomyces		0	0	0	0	1	1	0	0	0	0	0	0	1	0	0	0	1	0	0	0	0	0	0	0	0	0	0	1	0	0	0	0	0	1	0	0	0	0	0	2	0
1101:13163:14052__R_042	Bacteria		Actinobacteria	Actinobacteria	Streptomycetales	Streptomycetaceae	Streptomyces		0	0	1	0	0	1	0	0	0	0	1	0	0	0	0	0	0	0	0	0	0	0	0	0	1	0	0	0	0	0	0	0	1	0	0	0	0	0	0	0	1
1101:13342:8497__R_080	Bacteria		Actinobacteria	Actinobacteria	Streptomycetales	Streptomycetaceae	Streptomyces		34	107	0	44	79	72	116	0	47	8	29	12	33	10	46	58	62	11	40	11	11	26	21	58	65	37	21	57	4	66	0	12	89	10	53	80	5	11	37	28	44
1101:13354:14989__S_095	Bacteria		Actinobacteria	Actinobacteria	Streptomycetales	Streptomycetaceae	Streptomyces		0	0	0	0	0	0	0	0	0	0	0	0	0	0	0	0	0	0	0	0	0	0	0	0	0	0	0	0	0	0	0	0	0	0	0	0	0	0	0	0	0
1101:15009:15398__S_071	Bacteria		Actinobacteria	Actinobacteria	Streptomycetales	Streptomycetaceae	Streptomyces		0	0	0	0	0	0	0	0	0	0	0	0	2	1	0	0	0	0	0	0	0	0	0	0	0	0	0	0	0	0	0	0	0	0	0	0	0	0	0	0	0
1101:15727:7109__S_020	Bacteria		Actinobacteria	Actinobacteria	Streptomycetales	Streptomycetaceae	Streptomyces		0	0	1	0	0	0	1	0	0	0	0	0	1	0	0	6	5	0	2	0	0	0	0	0	5	0	0	1	0	3	0	0	1	0	0	3	0	0	0	0	1
1101:19233:8076__S_029	Bacteria		Actinobacteria	Actinobacteria	Streptomycetales	Streptomycetaceae	Streptomyces		0	1	0	0	0	0	0	0	0	0	0	0	0	0	0	0	0	0	1	0	0	0	0	0	0	0	0	0	0	0	0	0	0	0	0	1	0	1	0	0	0
1101:19553:20003__S_054	Bacteria		Actinobacteria	Actinobacteria	Streptomycetales	Streptomycetaceae	Streptomyces		0	0	0	0	0	0	0	0	0	0	1	0	0	0	0	0	0	0	0	0	0	0	0	0	0	0	0	0	0	0	0	0	0	0	0	0	0	0	0	0	0
1101:20373:10770__R_004	Bacteria		Actinobacteria	Actinobacteria	Streptomycetales	Streptomycetaceae	Streptomyces		0	1	0	1	0	0	0	0	0	0	2	0	0	0	0	0	1	0	0	0	0	1	0	0	0	0	0	1	0	0	0	0	0	0	0	1	0	0	0	0	1
1101:21816:16558__R_040	Bacteria		Actinobacteria	Actinobacteria	Streptomycetales	Streptomycetaceae	Streptomyces		0	0	0	1	0	0	0	0	0	0	0	0	0	0	0	0	0	0	0	0	0	0	1	0	0	0	0	0	0	0	0	0	0	0	0	0	0	0	0	1	0
1101:23744:18558__R_111	Bacteria		Actinobacteria	Actinobacteria	Streptomycetales	Streptomycetaceae	Streptomyces		2	1	0	0	0	0	0	0	0	0	0	0	1	0	0	0	0	0	0	0	0	0	0	0	1	0	0	0	0	0	0	0	0	0	0	1	0	0	0	0	0
1101:24549:14255__R_011	Bacteria		Actinobacteria	Actinobacteria	Streptomycetales	Streptomycetaceae	Streptomyces		1	0	0	0	0	1	0	0	0	0	2	0	2	0	0	0	0	0	0	0	0	0	1	0	0	0	0	0	0	1	0	0	0	0	0	0	0	0	0	0	0
1101:25737:10654__R_034	Bacteria		Actinobacteria	Actinobacteria	Streptomycetales	Streptomycetaceae	Streptomyces		1	0	0	0	0	0	0	0	1	1	3	0	1	0	0	0	0	0	0	0	0	0	1	0	0	0	0	0	0	0	0	0	0	2	0	0	0	0	0	0	0
1101:25957:19725__R_016	Bacteria		Actinobacteria	Actinobacteria	Streptomycetales	Streptomycetaceae	Streptomyces		0	0	0	0	1	0	0	0	0	0	0	0	0	0	0	2	1	0	0	0	0	0	0	0	0	0	0	0	0	0	0	0	0	0	0	0	0	0	0	0	1
1101:28269:10971__S_083	Bacteria		Actinobacteria	Actinobacteria	Streptomycetales	Streptomycetaceae	Streptomyces		0	0	0	2	0	0	0	0	3	0	0	0	0	0	0	0	5	0	0	0	0	0	0	2	0	1	0	0	0	0	0	0	0	2	0	0	0	0	0	0	0
1101:5135:7210__R_066	Bacteria		Actinobacteria	Actinobacteria	Streptomycetales	Streptomycetaceae	Streptomyces		0	1	0	0	0	0	0	0	0	0	0	0	0	0	0	0	0	0	0	0	0	0	0	0	0	1	0	0	0	1	0	0	0	0	0	0	0	0	0	0	0
1101:5459:16243__R_028	Bacteria		Actinobacteria	Actinobacteria	Streptomycetales	Streptomycetaceae	Streptomyces		2	1	0	2	1	2	0	0	0	0	0	0	0	0	0	0	0	0	0	0	0	0	0	1	0	0	0	1	0	0	0	0	0	0	0	0	0	0	0	0	0
1101:6023:24002__R_097	Bacteria		Actinobacteria	Actinobacteria	Streptomycetales	Streptomycetaceae	Streptomyces		0	0	0	0	0	0	1	0	0	0	0	0	1	0	0	0	0	0	0	0	0	0	0	0	0	0	0	0	0	0	0	0	0	0	0	0	0	0	0	0	1
1101:6162:19525__R_101	Bacteria		Actinobacteria	Actinobacteria	Streptomycetales	Streptomycetaceae	Streptomyces		0	0	0	0	0	0	0	0	0	0	1	0	0	0	0	0	0	0	0	0	0	0	0	0	1	0	0	0	0	0	0	0	0	0	0	0	0	0	0	0	1
1101:6414:22648__R_125	Bacteria		Actinobacteria	Actinobacteria	Streptomycetales	Streptomycetaceae	Streptomyces		0	0	0	0	1	1	1	1	0	0	0	0	0	0	1	0	1	1	0	0	0	0	0	0	3	0	0	0	0	0	0	1	1	0	0	1	0	0	0	0	0
1101:8250:19119__R_027	Bacteria		Actinobacteria	Actinobacteria	Streptomycetales	Streptomycetaceae	Streptomyces		0	0	0	0	0	1	1	0	0	0	4	3	0	0	0	0	0	0	0	0	0	0	0	0	0	0	50	0	0	7	0	0	2	0	0	0	0	0	0	0	0
1101:9684:3885__S_029	Bacteria		Actinobacteria	Actinobacteria	Streptomycetales	Streptomycetaceae	Streptomyces		0	0	0	0	0	0	0	0	0	0	0	0	0	0	0	0	0	0	0	0	0	0	0	1	0	0	0	0	0	0	0	0	0	0	0	0	0	0	0	0	1
1102:10941:8816__R_104	Bacteria		Actinobacteria	Actinobacteria	Streptomycetales	Streptomycetaceae	Streptomyces		0	0	1	0	0	0	0	0	0	0	0	0	0	0	0	0	0	0	0	0	0	0	0	0	0	0	1	1	0	0	0	0	0	0	0	0	0	0	0	0	1
1102:14998:18571__R_058	Bacteria		Actinobacteria	Actinobacteria	Streptomycetales	Streptomycetaceae	Streptomyces		0	1	0	0	0	0	1	0	0	0	0	0	1	0	0	0	0	0	0	0	0	1	0	0	0	0	0	1	0	1	0	0	0	0	0	1	0	1	1	0	0
1102:16699:16094__R_011	Bacteria		Actinobacteria	Actinobacteria	Streptomycetales	Streptomycetaceae	Streptomyces		5	0	2	0	0	5	0	3	0	3	17	0	23	6	0	0	0	0	0	0	0	0	5	0	0	0	0	0	0	1	6	0	0	25	0	0	0	1	0	0	0
1102:22265:3992__R_104	Bacteria		Actinobacteria	Actinobacteria	Streptomycetales	Streptomycetaceae	Streptomyces		0	0	0	0	0	0	0	0	1	0	0	0	0	0	0	0	0	0	0	0	0	0	0	0	0	0	0	0	0	0	0	0	0	0	0	0	0	0	2	0	0
1102:23886:25062__R_106	Bacteria		Actinobacteria	Actinobacteria	Streptomycetales	Streptomycetaceae	Streptomyces		0	0	0	0	0	0	0	0	0	0	0	0	0	0	0	0	1	0	0	0	0	0	0	0	0	0	0	0	0	1	0	0	0	0	0	0	0	0	0	0	0
1102:24727:5161__R_080	Bacteria		Actinobacteria	Actinobacteria	Streptomycetales	Streptomycetaceae	Streptomyces		0	0	1	0	0	0	0	0	0	0	0	0	0	0	0	0	0	0	0	0	0	0	0	1	0	0	0	0	0	0	0	0	0	0	0	0	0	0	0	0	0
1102:26112:11996__R_099	Bacteria		Actinobacteria	Actinobacteria	Streptomycetales	Streptomycetaceae	Streptomyces		0	0	1	0	0	1	0	0	0	1	1	0	1	1	0	0	0	0	0	0	0	0	1	0	0	0	0	0	0	0	1	0	0	0	0	0	0	1	0	0	0
1102:26223:6396__R_006	Bacteria		Actinobacteria	Actinobacteria	Streptomycetales	Streptomycetaceae	Streptomyces		0	0	3	0	0	1	0	0	0	0	1	0	0	0	0	0	1	0	0	0	0	0	0	0	0	0	0	0	0	0	0	0	0	0	0	0	0	0	0	0	0
1102:26668:19397__R_100	Bacteria		Actinobacteria	Actinobacteria	Streptomycetales	Streptomycetaceae	Streptomyces		0	0	0	0	0	0	2	0	0	0	0	0	0	0	1	0	0	0	0	0	0	0	0	0	0	0	0	0	0	0	0	0	0	0	0	0	0	0	0	0	0
1102:3356:14840__R_096	Bacteria		Actinobacteria	Actinobacteria	Streptomycetales	Streptomycetaceae	Streptomyces		467	420	229	200	399	475	835	391	426	239	525	207	578	147	272	1277	957	174	629	66	170	298	397	392	769	331	220	404	58	762	257	428	200	460	259	742	93	544	926	547	504
1102:8229:21343__S_092	Bacteria		Actinobacteria	Actinobacteria	Streptomycetales	Streptomycetaceae	Streptomyces		0	0	0	0	0	0	0	0	0	0	0	0	0	0	0	0	2	0	0	0	0	0	0	0	0	0	0	0	0	0	0	0	0	0	0	0	0	0	1	0	0
1101:18678:24380__R_080	Bacteria		Actinobacteria	Actinobacteria	Streptomycetales	Streptomycetaceae	Streptomyces		0	0	0	0	0	0	0	0	0	0	0	0	0	0	0	0	0	0	0	0	0	0	0	0	0	0	0	0	0	0	0	0	0	0	0	1	0	0	0	0	0
1101:22444:13654__R_042	Bacteria		Actinobacteria	Actinobacteria	Streptomycetales	Streptomycetaceae	Streptomyces		0	0	0	0	0	1	1	0	0	0	0	0	0	0	0	0	0	0	0	0	0	0	0	0	0	0	0	0	0	0	0	0	0	0	0	0	0	0	0	0	0
1101:27499:12768__R_080	Bacteria		Actinobacteria	Actinobacteria	Streptomycetales	Streptomycetaceae	Streptomyces		4	7	0	17	17	48	47	10	14	6	9	3	55	9	7	5	35	6	10	3	8	29	0	48	47	7	4	35	8	50	0	8	12	2	5	55	2	18	3	8	10
1101:6545:9875__S_005	Bacteria		Actinobacteria	Actinobacteria	Streptomycetales	Streptomycetaceae	Streptomyces		0	3	0	11	0	3	0	0	0	4	2	2	0	1	2	0	19	1	0	8	2	10	3	5	55	6	4	0	2	5	0	0	2	1	8	1	1	1	12	0	6
1102:11473:7273__R_004	Bacteria		Actinobacteria	Actinobacteria	Streptomycetales	Streptomycetaceae	Streptomyces		0	0	0	1	0	0	2	0	0	0	0	0	0	0	0	0	0	0	0	0	0	0	0	0	1	0	0	0	0	0	0	0	0	0	0	0	0	1	0	0	0
1102:11611:6206__R_030	Bacteria		Actinobacteria	Actinobacteria	Streptomycetales	Streptomycetaceae	Streptomyces		0	0	0	0	2	0	0	0	0	0	0	0	0	0	0	0	2	0	1	0	0	0	0	0	0	2	0	1	0	1	0	0	0	0	0	0	0	0	0	0	0
1102:14105:24738__R_113	Bacteria		Actinobacteria	Actinobacteria	Streptomycetales	Streptomycetaceae	Streptomyces		0	0	0	1	0	0	0	0	0	0	0	0	0	0	0	3	0	0	0	0	0	0	0	0	0	0	0	0	0	0	0	0	0	0	0	0	0	0	1	0	0
1102:17527:19034__R_043	Bacteria		Actinobacteria	Actinobacteria	Streptomycetales	Streptomycetaceae	Streptomyces		36	18	30	8	63	27	11	66	37	5	8	20	50	16	62	217	81	3	90	0	3	61	12	1	9	43	14	48	23	142	0	0	26	10	18	51	7	19	87	94	2
1102:18422:28583__R_104	Bacteria		Actinobacteria	Actinobacteria	Streptomycetales	Streptomycetaceae	Streptomyces		1	0	0	0	0	0	0	0	2	0	0	1	0	0	0	0	0	0	0	0	0	0	1	0	0	0	0	3	0	0	0	0	0	1	0	0	0	1	0	0	1
1102:21409:15719__R_033	Bacteria		Actinobacteria	Actinobacteria	Streptomycetales	Streptomycetaceae	Streptomyces		0	3	0	16	18	4	8	0	2	8	6	0	1	3	9	1	6	1	0	0	0	4	0	0	0	3	3	0	2	1	0	0	12	0	0	18	0	1	3	0	11
1103:28005:9536__R_123	Bacteria		Actinobacteria	Actinobacteria	Streptomycetales	Streptomycetaceae	Streptomyces		0	0	0	0	1	0	0	0	1	0	1	0	1	0	1	1	1	0	0	0	0	0	1	0	1	0	2	2	0	1	0	0	0	0	1	0	0	2	1	0	1
1104:14958:3412__S_096	Bacteria		Actinobacteria	Actinobacteria	Streptomycetales	Streptomycetaceae	Streptomyces		0	0	0	0	0	0	0	1	0	0	0	0	0	0	0	3	0	0	0	0	0	0	0	0	2	0	1	0	0	1	0	0	0	2	0	0	0	0	0	0	0
1104:16682:13483__R_108	Bacteria		Actinobacteria	Actinobacteria	Streptomycetales	Streptomycetaceae	Streptomyces		0	0	0	0	0	0	0	0	0	0	0	0	0	0	0	1	0	0	0	0	0	0	0	0	0	1	1	0	0	0	0	0	0	0	0	0	0	0	0	0	0
1104:21079:15502__S_130	Bacteria		Actinobacteria	Actinobacteria	Streptomycetales	Streptomycetaceae	Streptomyces		2	0	2	0	1	0	3	0	0	1	0	0	0	0	0	3	0	0	0	0	0	0	0	0	0	0	0	0	0	1	0	0	3	0	0	3	0	1	0	2	0
2101:11924:7463__R_127	Bacteria		Actinobacteria	Actinobacteria	Streptomycetales	Streptomycetaceae	Streptomyces		0	1	0	0	0	0	0	0	0	0	0	0	0	0	0	1	1	0	0	0	0	0	1	0	1	0	0	2	0	0	0	0	0	0	0	0	0	0	0	0	0
2101:16558:4898__R_100	Bacteria		Actinobacteria	Actinobacteria	Streptomycetales	Streptomycetaceae	Streptomyces		0	1	0	1	0	1	1	1	0	0	0	0	0	0	0	1	1	1	0	0	0	1	0	0	0	0	0	0	0	1	0	1	1	0	0	1	0	0	2	2	1
2101:23317:14722__R_102	Bacteria		Actinobacteria	Actinobacteria	Streptomycetales	Streptomycetaceae	Streptomyces		0	0	0	0	0	1	0	0	0	0	1	0	0	0	0	0	0	0	0	0	0	0	0	0	0	0	0	0	0	0	0	0	0	0	0	0	0	0	0	0	0
2104:20221:20373__R_041	Bacteria		Actinobacteria	Actinobacteria	Streptomycetales	Streptomycetaceae	Streptomyces		1	0	0	0	1	0	0	0	0	1	1	0	2	0	0	0	0	0	1	0	0	0	0	0	0	0	1	0	0	0	0	0	0	0	0	0	0	0	0	0	1
1101:10635:12771__R_127	Bacteria		Actinobacteria	Actinobacteria	Streptomycetales	Streptomycetaceae			256	31	10	24	36	29	38	5	0	2	12	0	20	9	18	10	7	14	33	7	10	25	14	48	21	5	27	4	0	4	0	0	9	2	16	24	0	19	4	20	6
1101:15873:17908__R_034	Bacteria		Actinobacteria	Actinobacteria	Streptomycetales	Streptomycetaceae			1	0	1	0	2	4	0	1	0	0	5	2	3	1	0	0	0	0	0	0	0	0	2	0	1	0	0	0	0	1	0	0	0	17	0	0	0	1	0	0	0
1101:16045:19774__R_101	Bacteria		Actinobacteria	Actinobacteria	Streptomycetales	Streptomycetaceae			0	0	0	0	0	1	0	4	0	4	1	2	4	1	0	0	0	0	0	0	0	0	0	0	0	0	0	0	0	0	0	0	0	0	0	0	0	0	0	0	0
1101:16046:12944__R_111	Bacteria		Actinobacteria	Actinobacteria	Streptomycetales	Streptomycetaceae			8	1	0	0	3	2	1	0	1	0	0	2	3	1	5	0	1	0	0	0	0	0	2	3	2	1	2	1	0	0	1	0	1	2	0	0	0	2	0	0	0
1101:18546:27078__R_108	Bacteria		Actinobacteria	Actinobacteria	Streptomycetales	Streptomycetaceae			1	1	0	0	2	4	0	1	0	1	2	0	1	1	0	4	0	3	0	0	0	0	1	0	0	0	0	0	0	0	0	11	1	2	0	0	0	1	0	0	0
1101:26783:13616__R_099	Bacteria		Actinobacteria	Actinobacteria	Streptomycetales	Streptomycetaceae			1	0	4	0	0	0	0	1	0	1	4	0	9	2	0	0	0	0	0	0	0	0	1	0	0	0	0	0	0	0	0	0	0	3	0	0	0	0	0	0	0
1101:28947:15703__S_114	Bacteria		Actinobacteria	Actinobacteria	Streptomycetales	Streptomycetaceae			0	0	0	0	1	0	0	0	0	0	1	0	2	0	0	0	0	0	0	0	0	0	0	0	0	0	0	0	0	0	0	0	0	0	0	0	0	0	0	0	0
1102:10735:11609__S_030	Bacteria		Actinobacteria	Actinobacteria	Streptomycetales	Streptomycetaceae			0	0	0	0	0	0	0	0	0	0	0	0	0	0	0	0	0	5	0	0	0	0	0	0	0	0	0	0	0	0	0	6	0	0	0	0	0	0	0	0	0
1102:5517:7620__R_064	Bacteria		Actinobacteria	Actinobacteria	Streptomycetales	Streptomycetaceae			1	0	0	1	0	0	7	1	1	0	1	0	3	0	2	2	1	0	2	0	0	0	2	0	2	1	1	0	0	0	0	0	0	1	0	1	0	3	2	0	0
1101:8407:17171__R_003	Bacteria		Actinobacteria	Actinobacteria	Streptomycetales	Streptomycetaceae			0	0	3	0	2	5	0	0	0	1	7	0	9	7	2	0	0	0	0	0	0	0	7	0	0	1	0	0	0	0	1	0	0	8	0	0	0	1	0	0	0
1102:15346:2505__R_013	Bacteria		Actinobacteria	Actinobacteria	Streptomycetales	Streptomycetaceae			4	0	7	0	0	4	0	4	0	146	15	2	150	4	1	1	1	0	1	164	0	0	4	0	1	3	0	1	0	0	0	0	0	6	0	0	0	3	0	0	0
1103:17994:7856__R_006	Bacteria		Actinobacteria	Actinobacteria	Streptomycetales	Streptomycetaceae			1	0	2	0	0	37	0	0	0	5	14	1	30	5	2	0	2	0	0	0	0	0	5	0	0	0	0	0	0	7	115	0	0	46	0	0	2	51	0	0	0
1103:28360:15658__S_097	Bacteria		Actinobacteria	Actinobacteria	Streptomycetales	Streptomycetaceae			2	0	0	0	0	0	0	0	0	0	0	0	0	0	0	0	0	0	0	0	0	0	0	0	0	0	0	0	0	0	0	0	0	0	0	0	0	0	0	2	0
1104:17965:8356__S_032	Bacteria		Actinobacteria	Actinobacteria	Streptomycetales	Streptomycetaceae			0	0	2	0	3	8	0	4	0	6	12	2	18	10	0	0	1	0	0	0	0	0	13	0	0	1	0	0	0	1	1	2	0	18	0	0	1	4	0	0	0
1104:27994:20350__R_101	Bacteria		Actinobacteria	Actinobacteria	Streptomycetales	Streptomycetaceae			0	0	0	0	0	4	0	3	0	4	15	8	14	3	0	0	0	0	0	0	0	0	6	0	0	2	0	0	0	0	2	1	0	10	0	0	0	2	0	0	0
1104:8861:18657__R_115	Bacteria		Actinobacteria	Actinobacteria	Streptomycetales	Streptomycetaceae			1	0	0	1	0	0	0	0	0	0	0	0	0	0	1	0	0	0	0	0	0	0	0	0	0	0	1	0	0	0	0	0	0	0	0	0	0	0	0	0	0
2102:18232:22187__S_013	Bacteria		Actinobacteria	Actinobacteria	Streptomycetales	Streptomycetaceae			0	0	0	0	0	0	0	0	0	0	0	0	0	0	0	0	0	0	0	1	0	0	1	0	1	0	0	0	0	0	0	0	0	0	0	0	0	0	0	0	0
2103:18631:23189__R_023	Bacteria		Actinobacteria	Actinobacteria	Streptomycetales	Streptomycetaceae			0	0	3	0	0	2	0	1	0	0	3	0	2	2	0	0	0	0	1	0	0	0	13	0	0	0	0	0	0	0	0	1	0	1	0	0	0	0	0	0	0
2104:24607:19646__R_099	Bacteria		Actinobacteria	Actinobacteria	Streptomycetales	Streptomycetaceae			54	0	316	5	152	405	0	245	6	219	872	288	1411	678	41	8	3	1	12	3	4	0	563	0	0	89	2	0	0	22	290	31	0	1381	0	0	47	130	0	0	4
1101:17003:6629__S_071	Bacteria		Actinobacteria	Actinobacteria	Streptosporangiales	Streptosporangiaceae	Microbispora		0	0	0	0	0	0	0	0	0	0	0	0	0	0	3	0	0	0	0	0	0	0	0	0	0	0	0	0	0	0	0	0	0	0	0	4	0	0	0	0	0
1103:17612:15685__R_036	Bacteria		Actinobacteria	Actinobacteria	Streptosporangiales	Streptosporangiaceae	Nonomuraea		0	8	95	0	0	28	20	20	2	9	0	4	58	0	143	262	177	0	28	0	22	4	0	0	39	8	43	3	39	43	0	0	0	4	58	328	5	0	8	87	12
2101:29241:12211__R_003	Bacteria		Actinobacteria	Actinobacteria	Streptosporangiales	Streptosporangiaceae	Nonomuraea		0	0	3	0	0	0	0	0	0	1	0	0	0	0	0	2	2	0	0	0	0	0	0	0	0	0	0	0	1	0	0	0	0	0	0	1	0	0	0	1	0
1102:13553:23404__S_087	Bacteria		Actinobacteria	Actinobacteria	Streptosporangiales	Streptosporangiaceae	Sinosporangium	uncultured Sinosporangium sp.	0	0	0	0	0	0	0	0	0	0	0	0	0	0	0	0	0	0	0	0	0	0	0	0	0	0	0	0	0	0	0	0	0	0	0	0	0	0	0	0	0
1103:9729:18588__S_072	Bacteria		Actinobacteria	Actinobacteria	Streptosporangiales	Streptosporangiaceae	Sinosporangium	uncultured Sinosporangium sp.	0	0	0	0	0	0	0	0	0	0	0	0	0	0	0	0	0	0	0	0	0	0	0	0	0	0	0	0	0	0	0	0	0	0	0	0	0	0	0	0	0
2102:25770:7156__S_066	Bacteria		Actinobacteria	Actinobacteria	Streptosporangiales	Streptosporangiaceae	Streptosporangium		0	0	0	0	0	0	0	0	0	0	0	0	0	0	0	0	0	0	0	0	0	0	0	0	0	0	0	0	0	0	0	0	0	0	0	0	0	0	0	0	0
1102:6378:5452__R_016	Bacteria		Actinobacteria	Actinobacteria	Streptosporangiales	Streptosporangiaceae			0	0	1	0	0	0	0	0	0	0	0	0	0	0	0	9	4	0	0	0	0	0	0	0	0	0	0	0	0	0	0	0	0	0	0	0	0	0	0	1	0
1101:22417:24071__R_115	Bacteria		Actinobacteria	Actinobacteria	Streptosporangiales	Streptosporangiaceae			0	0	0	0	0	0	0	0	0	0	0	0	0	0	0	0	0	0	0	0	0	0	0	0	0	0	0	0	0	0	0	0	0	0	0	0	0	0	0	0	0
2103:17787:15533__R_066	Bacteria		Actinobacteria	Actinobacteria	Streptosporangiales	Streptosporangiaceae			0	0	42	0	0	6	0	0	0	0	0	1	2	0	0	199	47	0	3	0	0	5	0	0	0	0	0	0	6	0	0	0	0	1	0	11	0	0	0	31	0
1101:17351:20532__S_086	Bacteria		Actinobacteria	Actinobacteria	Streptosporangiales	Thermomonosporaceae	Actinoallomurus	uncultured Actinoallomurus sp.	0	0	6	2	1	0	0	1	0	0	0	0	0	5	0	0	2	0	0	0	0	1	0	0	0	0	2	0	0	31	0	3	0	0	0	8	0	0	0	0	3
1101:7056:5398__S_093	Bacteria		Actinobacteria	Actinobacteria	Streptosporangiales	Thermomonosporaceae	Actinoallomurus	uncultured Actinoallomurus sp.	0	0	0	0	0	0	0	0	0	0	0	0	0	0	0	0	0	0	0	0	0	0	0	0	0	0	0	0	0	0	0	0	0	0	0	0	0	0	0	0	0
1102:6464:23367__S_023	Bacteria		Actinobacteria	Actinobacteria	Streptosporangiales	Thermomonosporaceae	Actinoallomurus	uncultured Actinoallomurus sp.	0	0	0	0	0	0	0	0	0	0	0	0	0	0	0	0	0	0	0	0	0	0	0	0	0	0	0	0	0	0	0	0	0	0	0	1	0	0	0	0	0
1103:16495:12171__S_072	Bacteria		Actinobacteria	Actinobacteria	Streptosporangiales	Thermomonosporaceae	Actinoallomurus	uncultured Actinoallomurus sp.	0	0	0	0	0	0	0	0	0	0	0	0	0	0	0	0	0	0	0	0	0	0	0	0	0	0	0	0	0	0	0	0	0	0	0	0	0	0	0	0	0
1101:11150:26874__S_111	Bacteria		Actinobacteria	Actinobacteria	Streptosporangiales	Thermomonosporaceae	Actinomadura		0	0	0	0	0	0	0	0	0	0	0	0	0	0	0	0	0	0	0	0	0	0	0	0	0	0	0	1	0	0	0	0	0	0	0	0	0	0	0	0	0
1101:18600:16985__R_050	Bacteria		Actinobacteria	Actinobacteria	Streptosporangiales	Thermomonosporaceae	Actinomadura		2	30	3	1	1	0	0	0	0	0	0	0	3	0	13	0	0	0	26	0	0	1	0	0	0	5	8	0	2	0	0	0	30	0	0	10	0	0	0	0	0
1102:26436:20026__S_076	Bacteria		Actinobacteria	Actinobacteria	Streptosporangiales	Thermomonosporaceae	Actinomadura		0	0	0	0	0	0	0	0	0	0	0	0	0	0	0	0	0	0	0	0	0	0	0	0	0	0	0	0	0	0	0	0	0	0	0	0	0	0	0	0	0
2104:20229:3484__R_017	Bacteria		Actinobacteria	Actinobacteria	Streptosporangiales	Thermomonosporaceae	Actinomadura		0	0	0	0	0	0	0	0	0	0	0	0	0	0	0	0	12	0	0	0	0	0	0	0	0	0	0	0	0	0	0	0	0	0	0	0	0	0	0	0	0
1101:12456:19459__R_047	Bacteria		Actinobacteria	Actinobacteria	Streptosporangiales	Thermomonosporaceae			0	0	0	0	0	0	0	0	0	0	0	0	1	0	0	0	0	0	0	0	0	0	0	0	0	0	0	0	0	0	0	0	0	0	0	0	0	0	0	0	0
1101:13584:15011__R_022	Bacteria		Actinobacteria	Actinobacteria	Streptosporangiales	Thermomonosporaceae			0	0	0	1	0	2	3	0	0	0	1	1	6	0	3	0	0	0	0	0	0	25	0	0	11	5	0	1	0	0	0	0	0	5	0	0	0	0	0	0	0
1101:14610:24062__R_106	Bacteria		Actinobacteria	Actinobacteria	Streptosporangiales	Thermomonosporaceae			0	0	6	2	0	2	0	3	0	0	2	0	0	3	0	0	6	1	1	0	2	1	3	38	0	0	2	1	1	4	0	0	1	6	4	0	3	4	10	6	1
1102:21213:26075__S_094	Bacteria		Actinobacteria	Actinobacteria	Streptosporangiales	Thermomonosporaceae			0	0	0	0	0	0	0	0	0	0	0	0	0	0	0	0	0	0	0	0	0	0	0	0	0	0	0	0	0	0	0	0	0	0	0	0	0	0	0	0	0
1102:25811:8747__S_086	Bacteria		Actinobacteria	Actinobacteria	Streptosporangiales	Thermomonosporaceae			0	0	0	0	0	0	0	0	0	0	0	0	0	0	0	0	0	0	0	0	0	0	0	0	0	0	0	0	0	0	0	0	0	0	0	0	0	0	0	0	0
1101:8065:17929__S_072	Bacteria		Actinobacteria	Actinobacteria	Streptosporangiales	Thermomonosporaceae			0	0	0	0	0	0	0	0	0	0	0	0	0	0	0	0	0	0	0	0	0	0	0	0	0	0	0	0	0	0	0	0	0	0	0	0	0	0	0	0	0
2104:8297:11005__S_119	Bacteria		Actinobacteria	Actinobacteria	Streptosporangiales	Thermomonosporaceae			1	0	0	0	0	0	0	0	0	0	0	0	0	0	0	0	0	0	0	0	0	0	0	0	0	0	0	0	0	0	0	0	0	0	0	0	0	0	0	0	0
1101:23408:23419__R_001	Bacteria		Actinobacteria	Actinobacteria	Streptosporangiales				45	3	0	0	0	1	1	1	0	0	0	0	0	0	0	0	0	0	11	5	1	0	0	0	0	0	3	0	0	0	0	0	3	0	1	2	0	2	0	0	9
1102:15954:6505__S_023	Bacteria		Actinobacteria	Actinobacteria	Streptosporangiales				0	0	0	3	0	0	0	0	0	0	0	0	0	0	0	0	0	0	0	0	0	0	0	0	0	0	0	0	0	0	0	0	0	0	0	0	0	0	0	0	0
1102:12188:14176__S_029	Bacteria		Actinobacteria	Actinobacteria	Streptosporangiales				0	0	0	0	0	0	0	0	0	0	0	0	0	0	0	0	0	0	0	0	0	0	0	0	0	0	0	0	0	0	0	0	0	0	0	0	0	0	0	0	0
1103:7852:9323__S_029	Bacteria		Actinobacteria	Actinobacteria	Streptosporangiales				0	0	0	0	0	0	0	0	0	0	0	0	0	0	0	0	0	0	0	0	0	0	0	0	0	0	0	0	0	0	0	0	0	0	0	0	0	0	0	0	0
1104:10221:5370__S_058	Bacteria		Actinobacteria	Actinobacteria	Streptosporangiales				0	0	0	0	0	0	0	0	0	0	0	0	0	0	0	0	0	0	0	0	0	0	0	0	0	0	0	0	0	0	0	0	0	0	0	0	0	0	0	0	0
2101:21218:22007__S_066	Bacteria		Actinobacteria	Actinobacteria	Streptosporangiales				0	0	0	0	0	0	0	0	0	0	0	0	0	0	0	0	0	0	0	0	0	0	0	0	0	0	0	0	0	0	0	0	0	0	0	0	0	0	0	0	0
2103:18269:25276__S_086	Bacteria		Actinobacteria	Actinobacteria	Streptosporangiales				0	0	0	0	0	0	0	0	0	0	0	0	0	0	0	0	0	0	0	0	0	1	0	0	2	0	0	0	0	6	0	0	0	0	0	0	0	0	0	0	0
1101:10293:25614__S_039	Bacteria		Actinobacteria	Actinobacteria					0	0	0	0	0	0	0	0	0	0	0	0	0	0	0	0	0	0	0	0	0	0	0	0	0	0	0	0	0	0	0	0	0	0	0	0	0	0	1	0	0
1101:11177:14662__S_025	Bacteria		Actinobacteria	Actinobacteria					0	0	0	0	0	0	0	0	0	0	0	0	0	0	0	0	0	0	0	0	0	0	0	0	0	0	1	0	0	0	0	0	0	1	0	0	0	0	0	0	0
1101:11406:21365__S_107	Bacteria		Actinobacteria	Actinobacteria					0	0	0	0	0	0	0	0	0	0	0	0	0	0	0	0	0	0	0	0	0	0	0	0	0	0	0	0	0	0	0	0	0	0	0	0	0	0	0	0	0
1101:11969:20488__S_055	Bacteria		Actinobacteria	Actinobacteria					0	0	0	0	0	0	4	0	0	0	0	0	0	0	0	0	1	0	0	0	0	0	0	0	0	2	0	0	0	0	0	0	0	0	0	0	0	0	0	0	0
1101:12058:23523__S_109	Bacteria		Actinobacteria	Actinobacteria					0	13	0	3	1	2	0	1	0	0	5	1	0	0	0	0	1	0	0	1	1	0	2	0	0	0	0	4	0	6	0	0	2	1	0	0	0	0	0	0	0
1101:12217:9422__S_038	Bacteria		Actinobacteria	Actinobacteria					0	0	0	0	0	0	0	0	0	0	1	0	0	0	0	0	0	0	0	0	0	0	0	0	0	0	0	0	0	0	0	0	1	0	0	0	0	0	1	0	0
1101:12725:13684__S_090	Bacteria		Actinobacteria	Actinobacteria					3	28	9	10	6	14	1	15	1	3	5	1	1	0	8	3	0	4	2	6	0	7	0	10	21	15	3	4	1	23	0	12	1	0	7	22	5	5	0	41	18
1101:13054:10433__S_094	Bacteria		Actinobacteria	Actinobacteria					0	0	0	0	0	2	0	0	0	0	0	0	0	0	0	3	0	0	0	0	1	0	5	0	0	0	0	0	0	0	0	0	0	0	0	0	0	0	0	0	0
1101:13126:10877__R_025	Bacteria		Actinobacteria	Actinobacteria					3	3	0	0	3	2	19	0	0	0	3	0	0	1	0	16	0	1	0	0	1	0	0	0	44	0	13	0	0	0	0	0	5	1	0	17	0	0	0	0	1
1101:13180:24405__S_056	Bacteria		Actinobacteria	Actinobacteria					0	0	0	0	0	0	0	0	0	0	0	0	0	0	0	0	0	0	0	0	0	0	0	0	0	0	0	0	0	0	0	0	0	0	0	0	0	0	0	0	0
1101:13261:3985__S_068	Bacteria		Actinobacteria	Actinobacteria					0	0	0	0	0	0	0	0	0	0	0	0	0	0	0	0	0	0	0	0	0	0	0	0	0	0	0	0	0	0	0	0	0	0	0	0	0	0	0	0	0
1101:13474:12766__S_059	Bacteria		Actinobacteria	Actinobacteria					0	0	0	0	0	0	0	0	0	0	0	0	0	0	0	0	0	0	0	0	1	0	0	0	0	0	0	0	0	0	0	0	0	0	0	1	0	0	0	0	0
1101:13687:7061__R_024	Bacteria		Actinobacteria	Actinobacteria					28	52	4	26	7	54	43	3	13	3	11	5	30	6	10	11	25	6	79	23	10	27	27	63	88	17	34	0	0	50	0	12	17	27	13	25	0	55	10	23	65
1101:14363:6246__S_106	Bacteria		Actinobacteria	Actinobacteria					0	0	0	0	0	0	0	0	0	0	0	0	0	0	0	0	0	0	0	0	0	0	0	0	0	0	0	0	0	0	0	0	0	0	0	0	0	0	0	0	0
1101:14412:13151__S_096	Bacteria		Actinobacteria	Actinobacteria					0	0	0	0	0	0	0	0	0	0	0	0	0	0	0	0	0	0	0	0	0	0	0	0	0	0	0	0	0	0	0	0	0	0	0	0	0	0	0	0	0
1101:14618:15475__S_024	Bacteria		Actinobacteria	Actinobacteria					0	0	0	0	0	0	0	0	0	0	0	0	0	0	0	0	0	0	0	0	0	0	0	0	0	0	0	0	0	0	0	0	0	0	0	0	0	0	0	0	0
1101:16275:20469__R_063	Bacteria		Actinobacteria	Actinobacteria					0	0	0	2	0	0	0	0	0	0	0	0	0	1	0	0	0	0	6	0	0	0	0	0	0	0	0	0	0	0	0	0	0	0	0	0	0	0	0	0	0
1101:16328:23815__S_062	Bacteria		Actinobacteria	Actinobacteria					0	0	0	0	0	1	0	0	0	0	0	0	0	0	0	0	0	0	0	0	0	0	0	0	0	0	0	0	0	0	0	0	0	0	0	0	0	0	0	0	0
1101:18039:17042__S_055	Bacteria		Actinobacteria	Actinobacteria					0	0	0	0	0	0	0	0	0	0	0	0	0	0	0	0	0	0	0	0	0	0	0	0	0	0	0	0	0	0	0	0	0	0	0	0	0	0	0	0	0
1101:18566:22509__S_045	Bacteria		Actinobacteria	Actinobacteria					0	0	0	0	0	0	0	0	0	0	0	0	0	0	0	0	0	0	0	0	0	0	0	0	0	0	0	0	0	0	0	0	0	0	0	0	0	0	0	0	0
1101:18731:5715__R_090	Bacteria		Actinobacteria	Actinobacteria					3	6	10	4	11	4	7	3	2	3	6	4	7	11	14	23	8	4	2	18	3	0	3	8	13	7	1	0	0	9	0	0	29	0	19	5	0	15	0	3	9
1101:18738:19156__R_009	Bacteria		Actinobacteria	Actinobacteria					0	0	0	0	0	0	0	0	1	1	0	0	0	0	0	0	0	0	0	0	0	0	0	0	0	0	0	0	0	0	0	0	0	0	0	0	0	0	0	0	0
1101:19321:14786__S_079	Bacteria		Actinobacteria	Actinobacteria					0	0	0	0	0	0	0	0	0	0	0	0	0	0	0	0	0	0	0	0	0	0	0	0	0	0	0	0	0	0	0	0	0	0	0	0	0	0	0	0	0
1101:21198:15684__S_029	Bacteria		Actinobacteria	Actinobacteria					0	0	0	0	0	0	0	0	0	0	0	0	0	0	0	0	0	0	0	0	0	0	0	0	0	0	0	0	0	0	0	0	0	0	0	0	0	0	0	0	0
1101:21478:7567__S_121	Bacteria		Actinobacteria	Actinobacteria					0	0	0	0	0	0	0	0	0	0	0	0	0	0	0	0	0	0	0	0	0	0	0	0	0	0	0	0	0	0	0	0	0	0	0	0	0	0	0	0	0
1101:22992:12526__R_052	Bacteria		Actinobacteria	Actinobacteria					0	1	0	0	0	1	0	0	0	0	0	0	0	0	0	0	4	0	0	0	2	0	0	0	0	0	0	0	0	0	0	0	0	0	0	0	0	1	0	0	0
1101:23277:3839__S_009	Bacteria		Actinobacteria	Actinobacteria					0	0	0	0	0	0	0	0	0	0	0	0	0	0	0	0	0	0	0	0	0	0	0	0	0	0	0	0	0	0	0	0	0	0	0	0	0	0	0	0	0
1101:23590:16850__S_072	Bacteria		Actinobacteria	Actinobacteria					15	0	0	0	0	0	0	0	0	0	0	0	0	3	0	0	13	1	0	0	0	0	0	0	9	1	0	0	0	0	0	0	0	0	0	0	0	0	0	0	0
1101:24543:7800__R_091	Bacteria		Actinobacteria	Actinobacteria					0	0	2	0	0	1	0	0	0	0	0	0	1	0	0	0	0	4	7	0	0	0	0	1	1	0	0	6	0	8	0	0	0	0	0	6	0	2	0	0	1
1101:26218:6941__S_062	Bacteria		Actinobacteria	Actinobacteria					3	0	0	8	1	1	0	0	0	0	0	0	0	0	0	0	0	0	0	0	0	0	1	0	0	0	0	0	0	0	0	1	0	0	0	0	0	0	0	0	0
1101:27134:12020__R_117	Bacteria		Actinobacteria	Actinobacteria					0	0	0	0	0	6	4	0	0	0	0	0	0	0	0	0	1	0	0	0	3	1	0	0	0	6	0	0	0	1	0	0	0	0	0	1	0	0	0	0	0
1101:3278:13839__S_126	Bacteria		Actinobacteria	Actinobacteria					0	0	0	0	0	0	0	0	0	0	0	0	0	0	0	0	0	0	0	0	0	0	0	0	0	0	0	0	0	0	0	0	0	0	0	0	0	0	0	0	0
1101:4454:15410__R_038	Bacteria		Actinobacteria	Actinobacteria					0	2	3	4	2	0	0	0	0	0	0	0	6	4	7	0	0	2	0	0	0	0	0	0	0	0	9	0	0	1	0	0	0	8	0	0	0	24	0	0	3
1101:6532:9540__S_030	Bacteria		Actinobacteria	Actinobacteria					0	0	0	0	0	0	0	0	0	0	0	0	0	0	0	0	0	0	0	0	0	0	0	0	0	0	0	0	0	0	0	0	0	0	0	0	0	0	0	0	0
1101:8105:22904__S_105	Bacteria		Actinobacteria	Actinobacteria					0	0	1	0	0	0	0	0	0	0	0	0	0	0	0	0	0	0	0	0	1	1	0	0	0	0	0	0	0	0	0	0	3	0	0	0	0	0	0	0	1
1102:10161:10134__S_053	Bacteria		Actinobacteria	Actinobacteria					0	0	0	0	0	0	0	0	0	0	0	0	0	0	0	0	0	0	0	0	0	0	0	0	0	0	0	0	0	0	0	0	0	0	0	0	0	0	0	0	0
1102:10752:18519__S_044	Bacteria		Actinobacteria	Actinobacteria					0	0	0	0	0	0	0	0	0	0	0	0	0	0	0	0	0	0	0	0	0	0	0	0	0	0	0	0	0	0	0	0	0	0	0	0	0	0	0	0	0
1102:12399:15200__S_124	Bacteria		Actinobacteria	Actinobacteria					0	0	0	0	3	0	0	0	0	0	0	1	0	0	0	0	0	0	0	0	0	0	0	0	0	0	0	0	0	0	0	0	0	0	0	0	0	0	0	0	0
1102:12747:12397__S_053	Bacteria		Actinobacteria	Actinobacteria					0	0	0	0	0	0	0	0	0	0	2	0	0	0	0	0	0	0	0	0	0	0	0	0	0	0	0	0	0	0	0	0	0	0	0	0	0	0	0	0	0
1102:13751:9450__S_016	Bacteria		Actinobacteria	Actinobacteria					0	0	0	0	0	1	0	0	0	0	0	0	0	0	0	0	1	0	0	0	0	0	0	0	0	0	0	0	0	0	0	0	0	0	0	0	0	0	0	0	0
1102:15275:5479__S_061	Bacteria		Actinobacteria	Actinobacteria					0	0	0	0	0	0	0	0	0	0	0	0	0	0	0	0	0	0	0	0	0	0	0	0	0	0	0	0	0	0	0	0	0	0	0	0	0	0	0	0	0
1102:16948:6359__S_129	Bacteria		Actinobacteria	Actinobacteria					0	0	0	0	0	0	0	0	0	0	0	0	0	0	0	0	0	0	0	0	0	0	0	0	0	0	0	0	0	0	0	0	0	0	0	1	0	0	0	0	0
1102:19345:11892__S_080	Bacteria		Actinobacteria	Actinobacteria					0	0	0	0	0	0	0	0	0	0	0	0	0	0	0	0	0	0	0	0	0	0	0	0	0	0	0	0	0	0	0	0	0	0	0	0	0	0	0	0	0
1102:21260:5539__S_061	Bacteria		Actinobacteria	Actinobacteria					0	0	0	0	0	0	0	0	0	0	0	0	0	0	0	0	0	0	0	0	0	0	0	0	0	0	0	0	0	0	0	0	0	0	0	0	0	0	0	0	0
1102:22248:27071__S_082	Bacteria		Actinobacteria	Actinobacteria					0	0	0	0	0	0	0	0	0	0	0	0	0	0	0	0	0	0	0	0	0	0	0	0	0	0	0	0	0	0	0	0	0	0	0	0	0	0	0	0	0
1102:22411:13064__S_051	Bacteria		Actinobacteria	Actinobacteria					0	0	0	0	0	0	0	0	0	0	0	0	0	0	0	0	0	0	0	0	0	0	0	0	2	0	0	0	0	1	0	0	0	0	1	1	0	0	0	0	0
1102:24486:16672__S_068	Bacteria		Actinobacteria	Actinobacteria					0	0	0	0	0	0	0	0	0	0	0	0	0	0	0	0	0	0	0	0	0	0	0	0	0	0	0	0	0	0	0	0	0	0	0	0	0	0	0	0	0
1102:27458:20039__R_016	Bacteria		Actinobacteria	Actinobacteria					0	0	0	0	0	0	0	0	0	0	0	0	0	0	0	2	0	0	0	0	0	0	0	0	0	0	0	0	0	0	0	0	0	0	0	0	0	0	0	0	0
1102:6584:12918__S_090	Bacteria		Actinobacteria	Actinobacteria					1	1	0	0	0	0	0	0	0	0	0	0	0	0	0	0	0	0	0	0	0	0	0	0	0	0	0	0	0	0	0	0	0	0	0	0	0	0	0	0	0
1102:8648:23729__S_030	Bacteria		Actinobacteria	Actinobacteria					0	0	0	0	0	0	1	0	0	0	1	0	0	0	0	0	0	0	0	0	0	2	0	0	0	0	0	0	0	0	0	0	0	0	0	0	0	0	0	0	0
1102:8786:19339__S_017	Bacteria		Actinobacteria	Actinobacteria					0	0	0	0	0	0	0	0	0	0	0	0	0	0	0	0	0	0	0	0	0	0	0	0	0	0	0	0	0	0	0	0	0	0	0	0	0	0	0	0	0
1101:13249:10541__S_061	Bacteria		Actinobacteria	Actinobacteria					0	0	0	0	0	0	0	0	0	0	0	0	0	0	0	0	0	0	0	0	0	0	0	0	0	0	0	0	0	0	0	0	0	0	0	0	0	0	0	0	0
1101:13918:11785__S_104	Bacteria		Actinobacteria	Actinobacteria					0	0	0	0	0	0	0	0	0	0	0	0	0	0	0	0	0	0	0	0	0	0	0	0	0	0	0	0	0	0	0	0	0	0	0	0	0	0	0	0	0
1101:16585:8248__R_110	Bacteria		Actinobacteria	Actinobacteria					0	0	0	0	0	1	1	0	0	0	0	0	0	1	0	1	0	0	0	0	0	0	0	0	0	0	0	0	0	1	0	0	1	0	0	0	0	0	0	0	0
1101:18602:10339__S_083	Bacteria		Actinobacteria	Actinobacteria					0	0	0	0	0	0	0	0	0	0	0	0	0	0	0	0	0	0	0	0	0	0	0	0	0	0	0	0	0	0	0	0	0	0	0	0	0	0	0	0	0
1101:20227:19756__S_006	Bacteria		Actinobacteria	Actinobacteria					0	0	1	0	0	0	1	0	0	0	0	0	0	0	0	0	0	0	0	0	0	0	0	0	0	0	0	0	0	0	0	0	0	0	0	0	0	0	0	0	0
1101:20900:17201__S_050	Bacteria		Actinobacteria	Actinobacteria					0	0	0	0	0	0	0	0	0	0	0	0	0	0	0	0	0	0	0	0	0	0	0	0	0	0	0	0	0	0	0	0	0	0	0	0	0	0	0	0	0
1101:21825:17012__S_088	Bacteria		Actinobacteria	Actinobacteria					0	0	0	0	0	1	0	0	0	0	0	0	0	0	0	0	0	0	0	0	0	0	0	0	2	0	0	0	0	0	0	0	0	0	0	0	0	0	0	0	1
1101:23151:20247__S_021	Bacteria		Actinobacteria	Actinobacteria					0	1	0	0	0	0	0	0	0	0	0	0	0	0	0	0	0	0	0	0	0	1	3	0	0	0	0	0	0	0	0	0	0	0	0	0	0	0	0	0	0
1101:23332:16855__S_063	Bacteria		Actinobacteria	Actinobacteria					0	0	0	0	0	0	0	0	0	0	0	0	0	0	0	0	0	0	0	0	0	0	0	0	0	0	0	0	0	0	0	0	0	0	0	0	0	0	0	0	0
1101:9138:9749__S_040	Bacteria		Actinobacteria	Actinobacteria					0	0	12	0	0	2	0	0	0	0	0	0	0	0	0	0	0	0	0	0	0	0	0	0	0	0	0	0	0	0	0	0	0	0	0	0	0	0	0	0	0
1102:16839:20899__R_052	Bacteria		Actinobacteria	Actinobacteria					0	1	1	0	0	0	0	0	0	1	0	0	0	0	0	0	0	0	0	0	0	0	0	0	0	0	0	0	0	0	0	0	0	0	0	0	0	0	0	0	0
1102:6121:24454__S_080	Bacteria		Actinobacteria	Actinobacteria					0	0	0	0	0	0	0	0	0	0	0	0	0	0	0	0	0	0	0	0	0	0	0	0	0	0	0	0	0	0	0	0	0	0	0	0	0	0	0	0	0
1103:11089:6534__R_113	Bacteria		Actinobacteria	Actinobacteria					18	3	3	4	3	0	1	3	0	5	3	0	1	0	9	3	0	0	0	2	0	0	4	0	0	0	1	2	0	0	1	1	3	2	0	0	0	12	0	0	0
1103:11560:8870__R_001	Bacteria		Actinobacteria	Actinobacteria					17	0	0	1	4	0	0	0	0	0	4	0	1	7	0	0	0	0	0	0	0	0	0	0	0	0	0	0	0	0	0	0	4	0	0	0	0	0	0	0	0
1103:11603:14424__R_125	Bacteria		Actinobacteria	Actinobacteria					0	0	0	0	0	0	0	0	0	0	0	0	0	0	0	0	0	0	0	0	0	0	0	0	0	0	0	0	0	0	0	0	0	0	0	0	0	0	0	0	0
1103:13115:18431__S_128	Bacteria		Actinobacteria	Actinobacteria					0	0	1	0	0	1	0	0	1	3	1	0	0	3	0	10	0	0	0	0	0	0	0	0	0	0	1	0	0	0	0	0	0	2	2	0	13	0	0	0	0
1103:16210:4483__S_064	Bacteria		Actinobacteria	Actinobacteria					0	0	1	1	2	3	2	0	0	0	0	0	0	0	0	0	0	0	2	0	0	2	0	0	0	0	5	0	0	2	0	0	0	0	0	0	0	0	0	0	0
1103:18706:20781__S_093	Bacteria		Actinobacteria	Actinobacteria					0	0	0	0	0	0	0	0	0	0	0	0	0	0	0	0	0	0	0	0	0	0	0	0	0	0	0	0	0	0	0	0	0	0	0	0	0	0	0	0	0
1103:7579:22373__S_033	Bacteria		Actinobacteria	Actinobacteria					0	0	0	0	0	0	0	0	0	0	0	0	0	0	0	0	0	0	0	0	0	0	0	0	0	0	0	0	0	0	0	0	0	0	0	0	0	0	0	0	0
1103:8094:21708__S_056	Bacteria		Actinobacteria	Actinobacteria					0	0	0	0	0	0	0	0	0	0	0	0	0	0	0	0	0	0	0	1	0	0	0	0	1	0	1	0	0	0	0	0	0	0	0	0	0	0	0	0	0
1104:18713:14133__R_082	Bacteria		Actinobacteria	Actinobacteria					7	0	3	0	0	0	3	0	0	0	0	0	0	0	0	0	0	0	0	0	0	3	0	0	0	0	0	0	0	0	0	0	1	0	13	0	2	0	0	0	0
1104:21033:5266__S_096	Bacteria		Actinobacteria	Actinobacteria					0	0	0	0	0	0	0	0	0	0	0	0	0	0	0	0	0	0	0	0	0	0	0	0	0	0	0	0	0	0	0	0	0	0	0	0	0	0	0	0	0
1104:22618:13217__S_032	Bacteria		Actinobacteria	Actinobacteria					0	0	0	0	0	0	0	0	0	0	0	0	0	0	0	0	0	0	0	0	0	0	0	0	0	0	0	0	0	0	0	0	0	0	0	0	0	0	0	0	0
1104:27492:21049__S_102	Bacteria		Actinobacteria	Actinobacteria					0	0	0	0	0	0	0	0	0	0	0	0	0	0	0	0	0	0	0	0	0	0	0	0	0	0	0	0	0	0	0	0	0	0	0	0	0	0	0	0	0
2101:11856:10022__S_131	Bacteria		Actinobacteria	Actinobacteria					0	0	0	0	0	0	0	0	0	0	0	0	0	0	0	0	0	0	0	0	0	0	0	0	0	0	0	0	0	0	0	0	0	0	0	0	0	0	0	0	0
2101:26403:8811__S_007	Bacteria		Actinobacteria	Actinobacteria					14	0	0	0	0	1	2	0	0	0	0	0	0	0	1	3	0	3	2	0	2	0	0	0	0	0	0	0	1	0	0	0	0	0	0	0	0	0	0	2	0
2102:14730:15084__S_009	Bacteria		Actinobacteria	Actinobacteria					0	0	0	0	0	0	0	0	0	0	0	0	0	0	0	0	0	0	0	0	0	0	0	0	0	0	0	0	0	0	0	0	0	0	0	0	0	0	0	0	0
2102:5590:16174__R_055	Bacteria		Actinobacteria	Actinobacteria					1	1	0	1	1	1	0	0	1	0	0	0	0	0	0	0	1	1	3	0	0	0	0	0	4	0	1	0	0	0	0	0	0	1	0	1	0	1	0	0	1
2104:14977:7607__S_005	Bacteria		Actinobacteria	Actinobacteria					0	0	0	0	0	0	0	0	0	0	0	0	0	0	0	0	0	0	0	0	0	0	0	0	0	0	0	0	0	0	0	0	0	0	0	0	0	0	0	0	0
2104:17321:8483__S_082	Bacteria		Actinobacteria	Actinobacteria					0	0	0	0	0	0	0	0	0	0	0	0	0	0	0	0	0	0	0	0	0	0	0	0	0	0	0	0	0	0	0	0	0	0	0	0	0	0	0	0	0
2104:18471:27636__S_005	Bacteria		Actinobacteria	Actinobacteria					9	3	0	5	4	2	0	2	0	0	2	1	0	2	11	0	4	21	18	10	3	2	14	0	68	20	27	7	0	1	0	7	19	7	0	6	0	34	0	0	12
2104:25125:20304__S_040	Bacteria		Actinobacteria	Actinobacteria					0	0	0	0	0	0	0	0	0	0	0	0	0	0	0	0	0	0	0	0	0	0	0	0	0	0	2	0	0	0	0	0	0	0	0	0	0	0	0	0	0
2104:25561:13648__S_026	Bacteria		Actinobacteria	Actinobacteria					0	0	0	0	0	0	0	0	0	0	0	0	0	0	0	0	0	0	0	0	0	0	0	0	0	0	0	0	0	0	0	0	0	0	0	0	0	0	3	0	0
1101:24672:21813__S_005	Bacteria		Actinobacteria	Coriobacteriia	Coriobacteriales	Coriobacteriaceae			0	0	0	0	0	0	0	0	0	0	0	0	0	0	0	0	1	0	0	0	0	0	0	0	0	0	0	0	0	0	0	0	0	0	0	0	0	0	0	0	0
1102:19547:8169__S_014	Bacteria		Actinobacteria	Rubrobacteria	Rubrobacterales	Rubrobacteraceae	Rubrobacter	uncultured Rubrobacter sp.	0	0	0	0	0	0	0	0	0	0	0	0	0	0	0	0	0	0	0	0	0	0	0	0	0	0	0	0	0	0	0	0	0	0	0	0	0	0	0	0	0
1101:27384:12907__S_006	Bacteria		Actinobacteria	Rubrobacteria	Rubrobacterales	Rubrobacteraceae	Rubrobacter	uncultured Rubrobacter sp.	0	0	0	0	3	0	1	0	0	0	0	0	0	0	0	18	0	0	0	0	0	1	0	0	3	0	0	0	0	0	0	0	0	0	0	0	0	0	0	0	0
1101:9773:25523__R_048	Bacteria		Actinobacteria	Rubrobacteria	Rubrobacterales	Rubrobacteraceae	Rubrobacter	uncultured Rubrobacter sp.	0	0	0	0	0	0	0	0	2	0	0	0	0	0	0	0	0	0	0	0	0	0	0	0	0	0	0	0	0	0	0	0	0	0	0	0	0	0	0	0	0
1103:16877:7896__R_128	Bacteria		Actinobacteria	Rubrobacteria	Rubrobacterales	Rubrobacteraceae	Rubrobacter		0	4	0	2	5	1	0	4	0	0	4	0	1	3	10	0	0	8	0	0	1	0	0	0	7	0	15	0	0	0	0	0	0	7	3	0	0	5	0	0	6
1101:11763:18316__R_049	Bacteria		Actinobacteria	Thermoleophilia	Solirubrobacterales	Conexibacteraceae	Conexibacter	uncultured Conexibacter sp.	20	4	20	14	19	33	12	16	13	0	29	4	11	14	32	0	27	25	56	11	5	22	6	62	10	18	28	2	1	7	2	7	10	0	15	7	0	68	3	0	15
1101:16266:25034__S_023	Bacteria		Actinobacteria	Thermoleophilia	Solirubrobacterales	Conexibacteraceae	Conexibacter	uncultured Conexibacter sp.	0	0	0	0	0	0	0	0	0	0	0	0	0	0	0	0	0	0	0	0	0	0	0	0	0	0	0	0	0	0	0	0	0	0	0	0	0	0	0	0	0
1101:17123:24870__R_039	Bacteria		Actinobacteria	Thermoleophilia	Solirubrobacterales	Conexibacteraceae	Conexibacter	uncultured Conexibacter sp.	0	0	0	0	0	0	0	8	0	0	1	0	0	0	2	0	0	0	0	0	0	0	0	0	0	0	0	0	1	2	0	0	0	0	0	0	0	0	53	0	0
1101:22049:10245__S_035	Bacteria		Actinobacteria	Thermoleophilia	Solirubrobacterales	Conexibacteraceae	Conexibacter	uncultured Conexibacter sp.	0	0	0	0	0	0	0	0	0	0	0	0	0	0	0	0	0	0	0	0	0	0	0	0	0	0	0	0	0	0	0	0	0	0	0	0	0	0	0	0	0
1101:24478:8044__R_047	Bacteria		Actinobacteria	Thermoleophilia	Solirubrobacterales	Conexibacteraceae	Conexibacter	uncultured Conexibacter sp.	2	1	0	1	0	0	0	0	0	0	0	0	0	0	0	0	0	0	1	0	0	0	1	1	0	0	0	0	0	0	0	0	1	0	0	0	0	0	0	0	0
1101:3977:8373__R_024	Bacteria		Actinobacteria	Thermoleophilia	Solirubrobacterales	Conexibacteraceae	Conexibacter	uncultured Conexibacter sp.	0	0	0	3	0	0	0	0	0	0	0	0	0	0	0	0	0	0	0	0	0	0	0	57	0	0	0	0	0	0	0	0	0	0	0	0	0	0	0	0	0
1102:22016:24392__S_094	Bacteria		Actinobacteria	Thermoleophilia	Solirubrobacterales	Conexibacteraceae	Conexibacter	uncultured Conexibacter sp.	0	0	0	0	0	0	0	0	0	0	0	0	0	0	0	0	0	0	0	0	0	0	0	0	0	0	0	0	0	0	0	0	0	0	0	0	0	0	0	0	0
1102:22182:21789__R_019	Bacteria		Actinobacteria	Thermoleophilia	Solirubrobacterales	Conexibacteraceae	Conexibacter	uncultured Conexibacter sp.	0	0	0	0	1	8	1	0	0	0	0	0	0	0	0	0	0	0	29	0	1	0	0	0	0	0	0	0	0	0	0	0	0	0	0	1	0	0	0	0	0
1102:28260:11023__R_119	Bacteria		Actinobacteria	Thermoleophilia	Solirubrobacterales	Conexibacteraceae	Conexibacter	uncultured Conexibacter sp.	8	0	3	1	1	2	4	4	1	1	2	0	1	0	0	0	4	0	6	0	0	6	4	2	0	0	3	0	0	1	0	5	0	2	7	1	0	2	0	0	0
1102:7048:18626__R_080	Bacteria		Actinobacteria	Thermoleophilia	Solirubrobacterales	Conexibacteraceae	Conexibacter	uncultured Conexibacter sp.	0	0	6	2	0	1	0	0	0	0	1	0	0	0	0	0	0	0	0	0	1	1	1	0	0	8	0	0	0	2	0	2	0	0	0	0	0	0	0	0	4
1101:15427:28287__R_065	Bacteria		Actinobacteria	Thermoleophilia	Solirubrobacterales	Conexibacteraceae	Conexibacter	uncultured Conexibacter sp.	0	0	0	0	0	0	0	0	0	0	0	0	0	0	0	0	0	0	0	0	0	0	0	0	0	0	0	0	0	0	0	0	0	0	0	0	0	0	0	0	0
1102:11898:24227__R_019	Bacteria		Actinobacteria	Thermoleophilia	Solirubrobacterales	Conexibacteraceae	Conexibacter	uncultured Conexibacter sp.	0	0	0	0	0	0	0	0	0	0	0	0	0	0	0	0	0	0	30	0	0	0	0	0	0	0	0	0	0	0	0	0	0	0	0	0	0	0	0	0	0
1102:24370:16165__S_084	Bacteria		Actinobacteria	Thermoleophilia	Solirubrobacterales	Conexibacteraceae	Conexibacter	uncultured Conexibacter sp.	0	0	0	0	0	0	0	0	0	0	0	0	0	0	0	0	0	0	0	0	0	0	0	0	0	0	0	0	0	0	0	0	0	0	0	0	0	0	0	0	0
2101:17939:8899__S_008	Bacteria		Actinobacteria	Thermoleophilia	Solirubrobacterales	Conexibacteraceae	Conexibacter	uncultured Conexibacter sp.	0	0	5	0	0	3	1	0	0	0	0	0	0	0	1	2	0	0	0	5	0	1	0	0	4	3	1	0	0	2	0	0	0	0	5	1	0	4	0	0	0
2101:9882:22833__S_006	Bacteria		Actinobacteria	Thermoleophilia	Solirubrobacterales	Conexibacteraceae	Conexibacter	uncultured Conexibacter sp.	0	0	0	0	0	0	0	0	0	0	0	0	0	0	0	0	0	0	0	0	0	0	0	0	0	0	0	0	0	0	0	0	0	0	0	0	0	0	0	0	0
2102:23108:14204__S_093	Bacteria		Actinobacteria	Thermoleophilia	Solirubrobacterales	Conexibacteraceae	Conexibacter	uncultured Conexibacter sp.	0	0	10	0	0	0	0	0	0	0	0	0	0	0	0	0	0	0	0	0	1	0	1	0	0	0	0	0	0	0	0	0	0	0	0	0	0	0	6	0	0
1102:14752:11189__R_108	Bacteria		Actinobacteria	Thermoleophilia	Solirubrobacterales	Conexibacteraceae	Conexibacter		0	0	0	0	0	0	0	0	0	0	0	0	0	0	0	0	5	0	0	0	0	0	0	0	0	0	0	0	0	0	0	0	0	0	0	0	0	0	0	0	1
1103:19028:19164__R_015	Bacteria		Actinobacteria	Thermoleophilia	Solirubrobacterales	Conexibacteraceae	Conexibacter		0	0	3	1	0	0	0	0	0	0	0	0	0	2	10	0	0	0	0	0	0	0	0	0	0	1	0	0	0	0	0	0	0	0	0	0	0	0	0	0	0
1103:20344:26469__R_095	Bacteria		Actinobacteria	Thermoleophilia	Solirubrobacterales	Conexibacteraceae	Conexibacter		1	0	0	0	0	1	0	0	0	0	0	0	0	0	0	0	0	0	0	0	0	0	0	0	0	0	0	0	0	1	0	1	0	0	0	0	0	0	0	0	0
1104:18217:23371__R_002	Bacteria		Actinobacteria	Thermoleophilia	Solirubrobacterales	Conexibacteraceae	Conexibacter		0	11	0	8	0	12	1	0	1	0	1	0	0	1	0	0	0	0	24	10	2	4	3	13	3	0	9	0	0	0	0	1	8	7	2	0	0	0	0	0	8
2102:6188:16549__R_108	Bacteria		Actinobacteria	Thermoleophilia	Solirubrobacterales	Conexibacteraceae	Conexibacter		0	0	0	3	0	0	0	0	0	0	0	0	0	0	0	0	0	0	0	0	1	0	0	0	0	0	0	0	0	0	0	0	0	0	0	0	0	0	0	0	0
1101:13522:21494__R_064	Bacteria		Actinobacteria	Thermoleophilia	Solirubrobacterales	Solirubrobacteraceae	Solirubrobacter	uncultured Solirubrobacter sp.	0	0	10	0	0	2	0	0	0	0	1	0	2	0	0	1	2	0	0	2	0	0	0	12	0	2	1	0	0	3	0	0	0	0	0	0	0	0	2	6	0
1102:10797:23773__S_017	Bacteria		Actinobacteria	Thermoleophilia	Solirubrobacterales	Solirubrobacteraceae	Solirubrobacter	uncultured Solirubrobacter sp.	0	0	0	0	0	0	0	0	0	0	1	1	1	8	0	2	10	0	3	1	0	0	0	0	1	14	11	2	2	5	0	5	0	0	0	0	0	0	0	0	0
1102:11607:13414__R_123	Bacteria		Actinobacteria	Thermoleophilia	Solirubrobacterales	Solirubrobacteraceae	Solirubrobacter	uncultured Solirubrobacter sp.	0	0	0	0	0	0	0	0	0	0	0	0	4	0	0	0	0	0	0	0	0	0	0	0	0	0	0	0	0	3	0	3	0	0	0	4	0	0	0	13	21
1102:14833:18914__R_065	Bacteria		Actinobacteria	Thermoleophilia	Solirubrobacterales	Solirubrobacteraceae	Solirubrobacter	uncultured Solirubrobacter sp.	0	0	0	0	0	0	0	0	0	0	0	0	8	0	0	1	0	0	0	0	0	0	0	0	0	0	0	0	0	0	0	0	0	0	0	2	0	1	0	0	0
1102:14985:16558__S_006	Bacteria		Actinobacteria	Thermoleophilia	Solirubrobacterales	Solirubrobacteraceae	Solirubrobacter	uncultured Solirubrobacter sp.	0	0	0	0	0	1	0	0	0	0	0	0	0	0	0	0	0	0	0	0	0	0	0	0	0	0	0	0	0	0	0	0	0	0	0	3	0	3	0	0	2
1102:20649:12357__S_093	Bacteria		Actinobacteria	Thermoleophilia	Solirubrobacterales	Solirubrobacteraceae	Solirubrobacter	uncultured Solirubrobacter sp.	0	0	0	0	0	0	0	0	0	0	0	0	0	0	0	0	0	0	0	0	0	0	0	0	0	0	0	0	0	0	0	0	0	0	0	0	0	0	0	0	0
1101:15760:12674__S_092	Bacteria		Actinobacteria	Thermoleophilia	Solirubrobacterales	Solirubrobacteraceae	Solirubrobacter	uncultured Solirubrobacter sp.	0	0	0	1	2	11	0	0	0	2	2	0	0	2	0	0	22	0	0	0	0	1	0	0	0	0	0	0	0	0	0	0	0	0	0	2	0	1	0	0	0
1101:21128:17855__S_087	Bacteria		Actinobacteria	Thermoleophilia	Solirubrobacterales	Solirubrobacteraceae	Solirubrobacter	uncultured Solirubrobacter sp.	0	0	0	0	0	0	0	0	0	0	0	0	0	0	0	0	0	0	0	0	0	0	0	0	0	0	0	0	0	0	0	0	0	0	0	0	0	0	0	0	0
1103:22066:14756__R_023	Bacteria		Actinobacteria	Thermoleophilia	Solirubrobacterales	Solirubrobacteraceae	Solirubrobacter	uncultured Solirubrobacter sp.	0	0	0	1	0	0	0	0	0	0	2	0	0	0	0	0	0	0	0	0	0	0	11	0	0	0	0	0	0	0	0	0	0	0	0	0	0	0	0	0	1
1103:29102:13970__S_083	Bacteria		Actinobacteria	Thermoleophilia	Solirubrobacterales	Solirubrobacteraceae	Solirubrobacter	uncultured Solirubrobacter sp.	0	0	0	0	0	0	0	0	0	0	0	0	0	0	0	0	0	0	0	0	0	0	1	0	0	0	0	0	0	0	0	0	0	0	0	0	0	0	0	0	0
2101:23646:13320__R_030	Bacteria		Actinobacteria	Thermoleophilia	Solirubrobacterales	Solirubrobacteraceae	Solirubrobacter	uncultured Solirubrobacter sp.	0	0	0	0	0	5	0	0	0	0	0	0	1	0	0	0	0	0	0	0	1	0	0	0	0	0	0	0	0	9	0	0	0	0	0	0	0	0	0	0	0
1101:6871:23352__R_025	Bacteria		Actinobacteria	Thermoleophilia	Solirubrobacterales	Solirubrobacteraceae	Solirubrobacter		0	0	0	0	0	0	0	0	0	0	0	0	0	0	7	0	6	0	0	0	0	0	0	0	21	0	0	0	1	9	0	0	0	0	0	1	0	0	0	0	0
1101:13293:12834__S_043	Bacteria		Actinobacteria	Thermoleophilia	Solirubrobacterales				0	0	0	0	0	0	0	0	0	0	0	0	0	0	0	0	0	0	0	0	0	0	0	0	0	0	0	1	0	0	0	0	0	0	0	0	0	0	0	0	0
1101:14235:9128__S_109	Bacteria		Actinobacteria	Thermoleophilia	Solirubrobacterales				16	29	2	11	1	10	5	0	0	5	3	1	3	0	3	0	7	4	10	1	4	18	0	0	0	5	1	0	0	3	0	0	5	3	0	4	0	10	3	6	4
1101:14766:2014__S_069	Bacteria		Actinobacteria	Thermoleophilia	Solirubrobacterales				5	0	0	0	2	6	1	0	0	0	0	0	0	0	0	0	0	3	7	0	0	0	9	0	0	0	0	0	0	0	0	0	0	0	0	1	0	0	0	18	0
1101:14869:16121__S_086	Bacteria		Actinobacteria	Thermoleophilia	Solirubrobacterales				0	0	0	0	0	0	0	0	0	0	0	0	0	0	0	0	0	0	0	0	0	0	0	0	0	0	0	0	0	0	0	0	0	0	0	0	0	0	0	0	0
1101:20725:22917__S_032	Bacteria		Actinobacteria	Thermoleophilia	Solirubrobacterales				0	0	1	0	0	0	5	0	0	0	0	0	0	0	0	0	0	0	0	0	0	0	0	0	0	0	0	22	0	0	0	0	0	0	0	0	0	0	0	0	0
1101:23134:18351__S_085	Bacteria		Actinobacteria	Thermoleophilia	Solirubrobacterales				0	0	0	0	0	2	0	0	0	0	0	0	0	0	0	0	0	0	0	0	0	1	0	0	0	0	0	0	0	0	0	0	0	0	0	0	0	0	1	0	0
1101:23933:24948__S_053	Bacteria		Actinobacteria	Thermoleophilia	Solirubrobacterales				0	0	0	0	0	1	0	0	0	0	0	0	0	0	0	0	0	0	0	0	0	0	0	0	0	0	0	0	0	0	0	0	0	0	0	0	0	0	0	0	0
1101:25893:11052__S_032	Bacteria		Actinobacteria	Thermoleophilia	Solirubrobacterales				0	0	1	0	0	0	1	0	0	0	0	1	0	0	0	0	0	0	0	0	0	0	0	0	0	0	0	1	0	0	0	0	0	0	0	0	0	0	0	0	0
1101:28227:21541__S_061	Bacteria		Actinobacteria	Thermoleophilia	Solirubrobacterales				0	0	0	0	0	0	0	0	0	0	0	0	0	0	0	0	0	0	0	0	0	0	0	0	0	0	0	0	0	0	0	0	0	0	0	0	0	0	0	0	0
1101:5040:10520__S_055	Bacteria		Actinobacteria	Thermoleophilia	Solirubrobacterales				0	0	0	0	0	0	0	0	0	0	0	0	1	0	0	0	0	0	0	0	0	0	0	0	0	0	0	0	0	0	0	0	0	0	0	0	0	0	0	0	3
1101:5624:22671__R_055	Bacteria		Actinobacteria	Thermoleophilia	Solirubrobacterales				0	0	0	0	0	0	0	0	0	0	0	0	0	0	0	0	0	0	0	0	0	0	0	0	0	0	0	0	0	0	0	0	0	0	0	0	0	0	0	0	0
1101:9347:17850__S_085	Bacteria		Actinobacteria	Thermoleophilia	Solirubrobacterales				0	0	7	0	0	3	0	0	0	0	2	0	1	0	3	0	0	0	0	0	1	0	0	0	0	0	0	0	0	0	0	0	0	0	0	0	0	0	0	0	0
1102:10669:13404__R_016	Bacteria		Actinobacteria	Thermoleophilia	Solirubrobacterales				5	0	0	0	0	2	0	0	0	0	6	0	0	0	0	16	0	1	0	1	0	0	0	0	0	1	0	0	1	0	0	0	0	1	0	1	0	0	0	0	0
1102:16045:13715__S_024	Bacteria		Actinobacteria	Thermoleophilia	Solirubrobacterales				0	0	0	0	0	0	0	0	0	0	0	0	0	0	0	0	0	0	0	0	0	0	0	0	0	0	0	0	0	0	0	0	0	0	0	0	0	0	0	0	0
1102:16582:26224__S_071	Bacteria		Actinobacteria	Thermoleophilia	Solirubrobacterales				0	0	0	0	0	0	0	0	0	0	0	0	0	0	0	0	0	0	0	0	0	0	0	0	0	0	0	0	0	0	0	0	0	0	0	0	0	0	0	0	0
1102:20780:6825__S_122	Bacteria		Actinobacteria	Thermoleophilia	Solirubrobacterales				0	0	0	0	0	0	0	0	0	0	0	0	0	0	0	0	0	0	0	0	0	0	0	0	0	0	0	0	0	0	0	0	0	0	0	0	0	0	0	0	0
1102:21913:18144__R_023	Bacteria		Actinobacteria	Thermoleophilia	Solirubrobacterales				0	0	0	0	0	0	0	0	0	0	0	0	0	0	0	0	0	0	0	0	0	0	7	0	0	0	0	0	0	0	0	0	0	0	0	0	0	0	0	0	0
1102:26210:20668__R_125	Bacteria		Actinobacteria	Thermoleophilia	Solirubrobacterales				0	0	0	1	0	1	2	0	0	0	0	0	0	0	0	2	0	0	0	0	0	0	0	0	0	0	0	0	0	1	0	0	0	0	0	0	0	0	0	0	0
1102:26898:14864__R_047	Bacteria		Actinobacteria	Thermoleophilia	Solirubrobacterales				0	0	0	0	0	0	0	0	0	0	0	0	0	0	0	0	0	0	0	0	0	0	7	0	0	0	0	0	0	0	0	0	0	0	0	0	0	0	0	0	0
1102:9312:11673__S_066	Bacteria		Actinobacteria	Thermoleophilia	Solirubrobacterales				0	0	0	0	0	0	0	0	0	0	0	0	0	0	0	0	0	0	0	0	0	0	0	0	0	0	0	0	0	0	0	0	0	0	0	0	0	0	0	0	0
1101:10248:17494__S_028	Bacteria		Actinobacteria	Thermoleophilia	Solirubrobacterales				0	0	0	0	0	0	0	0	0	0	0	0	0	0	0	0	0	0	0	0	0	0	0	0	0	0	0	0	0	0	0	0	0	0	0	0	0	0	0	0	0
1101:26221:9568__R_040	Bacteria		Actinobacteria	Thermoleophilia	Solirubrobacterales				0	0	7	0	0	0	0	0	0	0	0	0	0	0	0	0	5	0	0	0	0	1	0	0	0	6	0	0	0	1	0	0	2	0	0	0	0	0	0	63	0
1102:12102:4231__S_109	Bacteria		Actinobacteria	Thermoleophilia	Solirubrobacterales				0	0	0	0	0	0	0	0	0	0	0	0	0	0	0	0	0	0	0	0	0	0	0	0	0	0	0	0	0	0	0	0	0	0	0	0	0	0	0	0	0
1102:22330:13361__S_032	Bacteria		Actinobacteria	Thermoleophilia	Solirubrobacterales				0	0	0	0	0	0	0	0	0	0	0	0	0	0	0	0	0	0	0	0	0	0	0	0	0	0	0	0	0	0	0	0	0	0	0	0	0	0	0	0	0
1102:8707:19507__S_062	Bacteria		Actinobacteria	Thermoleophilia	Solirubrobacterales				0	0	0	0	0	0	0	0	0	0	0	0	0	0	0	0	0	0	0	0	0	0	0	0	0	0	0	0	0	0	0	0	0	0	0	0	0	0	0	0	0
1103:21060:21882__S_038	Bacteria		Actinobacteria	Thermoleophilia	Solirubrobacterales				0	0	12	5	1	1	0	0	0	3	1	2	0	0	1	6	1	0	6	0	3	9	0	0	0	0	1	0	0	11	0	0	12	5	0	9	3	0	0	23	0
1103:26607:15778__S_058	Bacteria		Actinobacteria	Thermoleophilia	Solirubrobacterales				0	0	0	0	0	0	0	0	0	0	0	0	0	0	0	0	0	0	0	0	0	0	0	0	0	0	0	0	0	0	0	0	0	0	0	0	0	0	0	0	0
2104:12568:23858__R_046	Bacteria		Actinobacteria	Thermoleophilia	Solirubrobacterales				0	0	0	0	0	2	0	0	0	0	0	0	0	0	0	0	0	0	0	0	0	0	0	0	0	0	0	0	0	0	0	0	0	0	0	0	0	0	0	0	0
1101:8005:26147__R_019	Bacteria		Actinobacteria	Thermoleophilia					0	0	0	0	2	0	0	0	0	0	0	0	0	0	6	0	0	0	8	0	0	0	0	0	0	0	0	0	0	0	0	4	0	0	0	0	0	0	0	0	0
1101:9305:13085__S_128	Bacteria		Actinobacteria	Thermoleophilia					0	0	0	0	0	0	0	0	0	0	0	0	0	0	0	0	0	0	0	0	0	0	0	0	0	0	0	0	0	1	0	0	0	0	0	0	0	0	0	0	0
1102:11477:9815__S_061	Bacteria		Actinobacteria	Thermoleophilia					0	0	0	0	0	0	0	0	0	0	0	0	0	0	0	0	0	0	0	0	0	0	0	0	0	0	0	0	0	0	0	0	0	0	0	0	0	0	0	0	0
1103:16654:25305__R_114	Bacteria		Actinobacteria	Thermoleophilia					0	0	0	0	0	0	0	0	0	0	4	0	0	0	0	0	0	0	0	0	0	0	0	0	0	0	0	4	0	0	0	0	0	0	0	0	0	0	3	0	0
1101:10045:10089__S_088	Bacteria		Actinobacteria						0	0	0	0	0	0	0	0	0	0	0	0	0	0	0	0	0	0	0	0	0	0	0	0	0	0	0	0	0	0	0	0	0	0	0	0	0	0	0	0	0
1101:10095:9610__S_100	Bacteria		Actinobacteria						0	0	0	0	0	0	0	0	0	0	0	0	0	0	0	0	0	0	0	0	0	0	0	0	0	0	0	0	0	0	0	0	0	0	0	0	0	0	0	0	0
1101:10315:5692__S_088	Bacteria		Actinobacteria						0	0	0	0	0	1	0	0	0	0	0	0	0	0	0	0	0	0	0	0	0	0	0	0	0	0	0	0	0	0	0	0	0	0	1	0	0	0	0	0	0
1101:10392:5119__S_102	Bacteria		Actinobacteria						0	0	0	0	0	0	0	0	0	0	0	0	0	0	0	0	0	0	0	0	0	0	0	0	0	0	0	0	0	0	0	0	0	0	0	0	0	0	0	0	0
1101:10533:20579__S_083	Bacteria		Actinobacteria						0	0	0	0	0	0	0	0	0	0	0	0	0	0	0	0	0	0	0	0	0	0	0	1	0	0	0	0	0	0	0	0	0	0	0	0	0	0	0	0	0
1101:10557:16770__S_040	Bacteria		Actinobacteria						0	0	0	0	0	0	0	0	0	0	0	0	0	0	0	0	0	0	0	0	0	0	0	0	0	0	0	0	0	0	0	0	0	0	0	0	0	0	0	0	0
1101:12044:17140__S_026	Bacteria		Actinobacteria						0	0	0	0	0	0	0	0	0	0	0	0	0	0	0	0	0	0	0	0	0	0	0	0	0	0	0	0	0	0	0	0	0	0	0	0	0	0	0	0	0
1101:12060:23928__S_008	Bacteria		Actinobacteria						0	0	0	0	0	0	0	0	0	0	0	0	0	0	0	0	0	0	0	0	0	0	0	0	0	0	0	0	0	0	0	0	0	0	0	0	0	0	0	0	0
1101:12258:23422__R_117	Bacteria		Actinobacteria						0	0	0	0	0	0	0	0	0	0	0	0	0	0	0	0	0	0	0	0	0	0	0	0	0	0	0	0	0	0	0	0	0	0	0	0	0	0	0	0	0
1101:12357:7884__R_090	Bacteria		Actinobacteria						0	0	0	0	0	0	0	0	0	0	0	0	0	0	0	0	0	0	0	0	0	0	1	0	0	0	0	0	0	0	0	0	0	0	0	0	0	0	0	0	0
1101:12529:9627__S_093	Bacteria		Actinobacteria						0	0	0	0	0	1	0	0	0	0	0	0	0	0	0	0	0	0	0	0	0	0	0	0	1	0	0	0	0	2	0	0	1	0	0	0	0	0	0	0	0
1101:12543:9403__S_098	Bacteria		Actinobacteria						0	0	0	0	0	0	0	0	0	0	0	0	0	0	0	0	0	0	0	0	0	0	0	0	0	0	0	0	0	0	0	0	0	0	0	0	0	0	0	0	0
1101:12842:17660__S_087	Bacteria		Actinobacteria						0	0	0	0	0	0	0	0	0	0	0	0	0	0	0	0	0	0	0	0	0	0	0	0	0	0	0	0	0	0	0	0	0	0	0	0	0	0	0	0	0
1101:12877:5071__S_087	Bacteria		Actinobacteria						0	0	0	0	0	0	0	0	0	0	0	0	0	0	0	0	0	0	0	0	0	0	0	0	0	0	0	0	0	0	0	0	0	0	0	0	0	0	0	0	0
1101:13092:18719__S_070	Bacteria		Actinobacteria						0	0	0	0	0	0	0	0	0	0	0	0	0	0	0	0	0	0	0	0	0	0	0	0	0	0	0	0	0	0	0	0	0	0	0	0	0	0	0	0	0
1101:13219:7908__S_107	Bacteria		Actinobacteria						0	0	0	0	0	0	0	0	0	0	0	0	0	0	0	0	0	0	0	0	0	0	0	0	0	0	0	0	0	0	0	0	0	0	0	0	0	0	0	0	0
1101:13233:8732__S_071	Bacteria		Actinobacteria						0	0	0	0	0	0	0	0	0	0	0	0	0	0	0	0	0	0	0	0	0	0	0	0	0	0	0	0	0	0	0	0	0	0	0	0	0	0	0	0	0
1101:13362:20123__R_019	Bacteria		Actinobacteria						0	12	0	2	1	2	0	0	2	0	1	0	0	5	0	21	0	0	74	0	0	7	12	0	1	0	0	0	0	0	0	0	6	6	0	8	0	0	47	0	0
1101:13971:12351__S_015	Bacteria		Actinobacteria						0	0	0	0	0	0	0	0	0	0	0	0	0	0	0	0	0	0	0	0	0	0	0	0	0	0	0	0	0	0	0	0	0	0	0	0	0	0	0	0	0
1101:14853:4810__S_096	Bacteria		Actinobacteria						0	0	0	0	0	0	0	0	0	0	0	0	0	0	0	0	0	0	0	0	0	0	0	0	0	0	0	0	0	0	0	0	0	0	0	0	0	0	0	0	0
1101:14978:2781__R_065	Bacteria		Actinobacteria						0	0	0	0	0	0	0	0	0	0	0	0	0	0	0	0	0	0	0	0	0	0	0	0	0	0	0	0	0	0	0	0	0	0	0	0	0	0	0	0	0
1101:14988:4098__R_125	Bacteria		Actinobacteria						0	0	0	4	0	0	0	0	0	0	1	0	0	0	0	0	0	11	0	0	4	4	0	0	4	0	0	0	0	0	0	0	0	0	5	1	0	0	0	0	0
1101:15126:17485__S_096	Bacteria		Actinobacteria						0	21	13	11	1	12	0	6	0	3	0	0	13	10	1	2	1	0	0	0	1	25	15	35	42	5	24	0	0	7	0	0	6	4	2	7	0	9	0	0	0
1101:15395:23702__R_106	Bacteria		Actinobacteria						0	0	0	0	0	0	0	0	0	0	9	0	0	0	0	0	0	0	0	0	0	0	3	0	0	0	0	0	0	0	0	0	0	0	0	0	0	0	0	0	0
1101:15610:6472__S_055	Bacteria		Actinobacteria						0	0	0	0	0	0	0	0	0	0	0	0	0	0	0	0	0	0	0	0	0	0	0	0	0	0	0	0	0	0	0	0	0	0	0	0	0	0	0	0	0
1101:15618:28882__S_093	Bacteria		Actinobacteria						0	0	0	0	0	0	0	0	0	0	0	0	0	0	0	0	0	0	0	0	0	0	0	0	0	0	0	0	0	0	0	0	0	0	0	4	0	0	0	0	0
1101:15721:14077__S_003	Bacteria		Actinobacteria						0	0	0	0	0	0	0	0	0	0	0	0	0	0	0	0	0	0	0	0	0	0	0	0	0	0	0	0	0	0	0	0	0	0	0	0	0	0	0	0	0
1101:16005:7957__S_109	Bacteria		Actinobacteria						0	0	0	0	0	0	0	0	0	0	0	0	0	1	0	0	0	0	0	0	0	0	0	0	0	0	0	0	0	0	0	0	0	0	0	0	0	0	0	0	0
1101:16012:13023__S_053	Bacteria		Actinobacteria						0	0	0	0	0	0	0	0	0	0	0	0	0	0	0	0	0	0	0	0	0	0	0	0	0	0	0	0	0	0	0	0	0	0	0	0	0	0	0	0	0
1101:16407:28310__S_101	Bacteria		Actinobacteria						0	0	0	0	0	0	0	0	0	0	0	0	1	0	0	0	0	0	0	0	0	0	0	0	0	0	0	0	0	0	0	0	0	0	0	0	0	0	0	0	0
1101:16426:2056__S_090	Bacteria		Actinobacteria						0	0	0	0	0	0	0	0	0	0	0	0	0	0	0	0	0	0	0	0	0	0	0	0	0	0	0	0	0	0	0	0	0	0	0	0	0	0	0	0	0
1101:16438:11186__S_087	Bacteria		Actinobacteria						0	0	0	0	0	0	0	0	0	0	0	0	0	0	0	0	0	0	0	0	0	0	0	0	0	0	0	0	0	0	0	0	0	0	0	0	0	0	0	0	0
1101:16865:19898__S_059	Bacteria		Actinobacteria						0	0	0	0	0	0	0	0	0	0	0	0	0	0	0	0	0	0	0	0	0	0	0	0	0	0	0	0	0	0	0	0	0	0	0	0	0	0	0	0	0
1101:17470:18566__S_062	Bacteria		Actinobacteria						0	0	1	1	0	8	0	0	5	0	0	0	0	0	0	8	0	0	0	1	4	1	0	0	0	0	1	0	0	0	0	0	0	0	0	3	0	2	0	0	12
1101:17804:20053__R_017	Bacteria		Actinobacteria						0	0	0	0	0	0	0	0	0	0	0	0	0	0	0	0	10	0	0	0	0	0	0	0	0	0	0	0	0	0	0	0	0	0	0	0	0	0	0	0	0
1101:17860:19894__S_079	Bacteria		Actinobacteria						0	0	0	0	0	0	0	0	0	0	0	0	0	0	0	0	0	0	0	0	0	0	0	0	0	0	0	0	0	0	0	0	0	0	0	0	0	0	0	0	0
1101:18284:20715__S_058	Bacteria		Actinobacteria						0	1	0	0	0	0	0	0	0	0	0	0	0	0	0	0	8	0	0	0	1	0	0	0	0	0	0	0	0	0	0	0	0	0	0	0	0	0	0	0	0
1101:18647:26716__S_091	Bacteria		Actinobacteria						0	0	0	0	0	1	0	0	0	0	0	0	0	0	0	0	0	0	0	0	0	0	0	0	0	0	0	0	0	0	0	0	0	0	0	0	0	0	0	0	0
1101:18802:9193__S_088	Bacteria		Actinobacteria						0	0	0	0	0	0	0	0	0	0	0	0	0	0	0	0	0	0	0	0	0	0	0	0	0	0	0	0	0	0	0	0	0	0	0	0	0	0	0	0	0
1101:18897:4190__S_040	Bacteria		Actinobacteria						0	0	0	0	0	0	0	0	0	0	0	0	0	0	0	0	0	0	0	0	0	0	0	0	0	0	0	0	0	0	0	15	0	0	0	0	0	0	0	0	0
1101:19318:23832__S_129	Bacteria		Actinobacteria						0	0	0	0	0	0	0	0	0	0	0	0	0	0	0	0	0	0	0	0	0	0	0	0	0	0	0	0	0	0	0	0	0	0	0	0	0	0	0	0	0
1101:19331:22393__S_086	Bacteria		Actinobacteria						0	0	0	0	0	0	0	0	0	0	0	0	0	0	0	0	0	0	0	0	0	0	0	0	0	0	0	0	0	0	0	0	0	0	0	0	0	0	0	0	0
1101:19539:2040__S_018	Bacteria		Actinobacteria						0	0	0	0	0	1	0	0	0	0	0	0	0	0	0	0	0	0	0	0	0	0	0	0	0	0	0	0	0	0	0	0	0	0	0	0	0	0	0	0	0
1101:20582:21551__S_094	Bacteria		Actinobacteria						0	0	0	1	0	0	0	0	0	0	0	0	0	0	0	0	0	0	0	0	0	0	0	0	0	0	0	0	0	0	0	0	0	3	0	0	0	0	0	0	0
1101:22152:10188__S_087	Bacteria		Actinobacteria						0	0	0	0	0	0	0	0	0	0	0	0	0	0	0	0	0	0	0	0	0	0	0	0	0	0	0	0	0	0	0	0	0	0	0	0	0	0	0	0	0
1101:22875:27000__S_082	Bacteria		Actinobacteria						0	0	0	0	0	0	0	0	0	0	0	0	0	0	0	0	0	0	0	0	0	0	0	0	0	0	0	0	0	0	0	0	0	0	0	0	0	0	0	0	0
1101:23205:20604__S_024	Bacteria		Actinobacteria						0	0	0	0	0	0	0	0	0	0	0	0	0	0	0	0	0	0	0	0	0	0	0	0	0	0	0	0	0	0	0	0	0	0	0	0	0	0	0	0	0
1101:23278:13671__S_085	Bacteria		Actinobacteria						0	0	0	0	0	0	0	0	0	0	0	0	0	0	0	0	0	0	0	0	0	0	0	0	0	0	0	0	0	0	0	0	0	0	0	0	0	0	0	0	0
1101:23295:5441__R_055	Bacteria		Actinobacteria						0	0	0	2	0	0	0	0	0	0	0	0	0	0	0	0	0	0	0	0	0	0	0	0	0	0	0	0	0	0	0	0	0	0	0	0	0	0	0	0	0
1101:23352:11621__S_061	Bacteria		Actinobacteria						0	0	0	0	0	0	0	0	0	0	0	0	0	0	0	0	0	0	0	0	0	0	0	0	0	0	0	0	0	0	0	0	0	0	0	0	0	0	0	0	0
1101:23707:25423__S_077	Bacteria		Actinobacteria						0	0	0	0	0	0	0	0	0	0	0	0	0	0	0	0	0	0	0	0	0	0	0	0	0	0	0	0	0	0	0	0	0	0	0	0	0	0	0	0	0
1101:23717:16309__S_061	Bacteria		Actinobacteria						0	0	0	1	0	1	0	0	0	0	0	0	0	0	0	0	0	0	0	0	0	0	0	0	0	0	1	0	0	18	0	0	2	2	0	0	0	0	6	0	0
1101:23750:21268__S_129	Bacteria		Actinobacteria						0	0	0	0	0	0	0	0	0	0	0	0	0	0	0	0	0	0	0	0	0	0	0	0	0	0	0	0	0	0	0	0	0	0	0	0	0	0	0	0	0
1101:24645:8241__S_077	Bacteria		Actinobacteria						0	0	0	0	0	0	0	0	0	0	0	0	0	0	0	0	0	0	0	0	0	0	0	0	0	0	0	0	0	0	0	1	0	0	0	0	0	0	0	0	0
1101:24712:5978__S_129	Bacteria		Actinobacteria						0	0	0	0	0	0	0	0	0	0	0	0	0	0	0	0	0	0	0	0	0	0	0	0	0	0	0	0	0	0	0	0	0	0	0	0	0	0	0	0	0
1101:26018:10417__S_059	Bacteria		Actinobacteria						0	0	0	0	0	0	0	0	0	0	0	0	0	0	0	0	0	0	0	0	0	0	0	0	0	0	0	0	0	0	0	0	0	0	0	0	0	0	0	0	0
1101:26579:9938__S_045	Bacteria		Actinobacteria						0	0	0	0	0	0	0	0	0	0	0	0	0	0	0	0	0	0	0	0	0	0	0	0	0	0	0	0	0	0	0	0	0	0	0	0	0	0	0	0	0
1101:28670:16120__S_011	Bacteria		Actinobacteria						0	0	0	0	0	0	0	0	1	0	0	0	0	0	0	0	0	0	0	0	0	0	0	0	0	0	0	0	0	0	0	0	0	0	0	0	0	0	0	0	0
1101:29157:11775__S_024	Bacteria		Actinobacteria						0	0	0	0	0	0	0	0	0	0	0	0	0	0	0	0	0	0	0	0	0	0	0	0	0	0	0	0	0	0	0	0	0	0	0	0	0	0	0	0	0
1101:29572:14042__S_024	Bacteria		Actinobacteria						0	0	0	0	0	0	0	0	0	0	0	0	0	0	0	0	0	0	0	0	0	0	0	0	0	0	0	0	0	0	0	0	0	0	0	0	0	0	0	0	0
1101:4066:7811__S_096	Bacteria		Actinobacteria						0	0	0	0	0	0	0	0	0	0	0	0	0	0	0	0	0	0	0	0	0	0	0	0	0	0	0	0	0	0	0	0	0	0	0	0	0	0	0	0	0
1101:4186:16844__S_051	Bacteria		Actinobacteria						0	0	0	0	0	0	0	0	0	0	0	0	0	0	0	0	0	0	0	0	0	0	0	0	0	0	0	0	0	0	0	0	0	0	0	0	0	0	0	0	0
1101:5055:15312__S_014	Bacteria		Actinobacteria						0	0	0	0	0	0	0	0	0	0	0	0	0	0	0	0	0	0	0	0	0	0	0	0	0	0	0	0	0	0	0	0	0	0	0	0	0	0	0	0	0
1101:5756:12259__S_026	Bacteria		Actinobacteria						0	0	0	0	0	0	0	0	0	0	0	0	0	0	0	0	0	0	0	0	0	0	0	0	0	0	0	0	0	0	0	0	0	0	0	0	0	0	0	0	0
1101:5877:13037__S_010	Bacteria		Actinobacteria						0	0	0	0	0	0	0	0	0	0	0	0	0	0	0	0	0	0	0	0	0	0	0	0	0	0	0	0	0	0	0	0	0	0	0	0	0	0	0	0	0
1101:8114:16316__S_025	Bacteria		Actinobacteria						0	0	0	0	0	0	0	0	0	0	0	0	0	0	0	0	0	0	0	0	0	0	0	0	0	0	0	0	0	0	0	0	0	0	0	0	0	0	0	0	0
1101:9162:7514__S_040	Bacteria		Actinobacteria						0	0	0	0	1	0	0	4	0	0	0	0	2	0	2	0	0	0	0	0	0	0	0	0	0	0	0	0	0	0	0	1	0	0	0	0	0	5	0	26	0
1101:9448:21952__S_120	Bacteria		Actinobacteria						0	0	0	0	0	0	0	0	0	0	0	0	0	0	0	0	0	0	0	0	0	0	0	0	0	0	0	0	0	0	0	0	0	0	0	0	0	0	0	0	0
1102:10991:9161__S_015	Bacteria		Actinobacteria						0	0	0	0	0	0	0	0	0	0	0	0	0	0	0	0	0	0	0	0	0	0	0	0	0	0	0	0	0	0	0	0	0	0	0	0	0	0	0	0	0
1102:11870:5423__S_080	Bacteria		Actinobacteria						0	0	0	0	0	0	0	0	0	0	0	0	0	0	0	0	0	0	0	0	0	0	0	0	0	0	0	0	0	0	0	0	0	0	0	0	0	0	0	0	0
1102:12418:11692__S_082	Bacteria		Actinobacteria						0	0	0	0	0	0	0	0	0	0	0	0	0	0	0	0	0	0	0	0	0	0	0	0	0	0	0	0	0	0	0	0	0	0	0	0	0	0	0	0	0
1102:12426:15110__S_122	Bacteria		Actinobacteria						0	0	0	0	0	0	0	0	0	0	0	0	0	0	0	0	0	0	0	0	0	0	0	0	0	0	6	0	0	0	0	0	0	0	0	0	0	0	0	0	0
1102:13102:9435__R_017	Bacteria		Actinobacteria						0	0	0	0	0	2	0	0	3	0	1	0	0	0	0	0	6	0	0	0	0	0	0	0	0	0	0	0	0	0	0	0	0	0	0	0	0	0	0	0	0
1102:13303:26213__R_017	Bacteria		Actinobacteria						0	0	0	0	0	0	0	0	0	0	0	0	0	0	0	0	1	0	0	0	0	0	0	0	0	0	0	0	0	0	0	0	0	0	0	0	0	0	0	0	0
1102:13474:22894__S_055	Bacteria		Actinobacteria						0	0	0	0	0	0	0	0	0	0	0	0	0	0	0	0	0	0	0	0	0	0	0	0	0	0	0	0	0	0	0	0	0	0	0	0	0	0	0	0	0
1102:13961:11495__S_055	Bacteria		Actinobacteria						0	0	0	0	0	0	0	0	0	0	0	0	0	0	0	0	0	0	0	0	0	0	0	0	0	0	0	0	0	0	0	0	0	0	0	0	0	0	0	0	0
1102:15533:18717__S_005	Bacteria		Actinobacteria						0	0	0	0	0	0	0	0	0	0	0	0	0	0	0	0	0	0	0	0	0	0	0	0	0	0	0	0	0	0	0	0	0	0	0	0	0	0	0	0	0
1102:16670:17308__S_079	Bacteria		Actinobacteria						0	0	1	0	0	0	0	0	0	0	0	0	0	0	0	0	0	0	0	0	0	0	0	0	0	0	0	0	0	0	0	0	0	0	0	0	0	0	0	0	0
1102:17939:7613__R_026	Bacteria		Actinobacteria						0	0	0	1	0	0	0	0	0	0	0	0	0	0	0	0	0	0	0	0	0	0	0	0	0	10	0	0	0	0	0	0	0	0	0	1	0	0	0	0	0
1102:18433:16997__S_091	Bacteria		Actinobacteria						0	0	0	0	0	0	0	0	0	0	0	0	0	0	0	0	0	0	0	0	0	0	0	0	0	0	0	1	0	0	0	0	0	0	0	0	0	0	0	0	0
1102:18923:13203__S_073	Bacteria		Actinobacteria						0	0	0	0	0	1	0	0	0	0	0	0	0	0	0	0	0	0	0	0	0	0	0	0	0	0	0	0	0	0	0	0	0	0	0	0	0	0	0	0	0
1102:19638:22381__S_017	Bacteria		Actinobacteria						0	0	0	0	0	0	0	0	0	0	0	0	0	0	0	0	0	0	0	0	0	0	0	0	0	0	0	0	0	0	0	0	0	0	0	0	0	0	0	0	0
1102:20493:25414__S_028	Bacteria		Actinobacteria						0	0	0	0	0	0	0	0	0	0	0	0	0	0	0	0	0	0	0	0	0	0	0	0	0	0	0	0	0	0	0	0	0	0	0	0	0	0	0	0	0
1102:20967:25202__S_061	Bacteria		Actinobacteria						0	0	0	0	0	0	0	0	0	0	0	0	0	0	0	0	0	0	0	0	0	0	0	0	0	0	0	0	0	0	0	0	0	0	0	0	0	0	0	0	0
1102:23637:21327__S_018	Bacteria		Actinobacteria						0	0	0	0	0	0	0	0	0	0	0	0	0	0	0	0	0	0	0	0	0	0	0	0	0	0	0	0	0	0	0	0	0	0	0	0	0	0	0	0	0
1102:23717:22391__S_003	Bacteria		Actinobacteria						0	0	7	0	0	0	0	0	0	0	0	0	0	0	0	0	0	0	0	0	0	0	0	0	0	0	6	0	0	0	0	0	0	0	0	0	0	0	0	0	0
1102:24255:11210__S_053	Bacteria		Actinobacteria						0	0	0	0	0	0	0	0	0	0	0	0	0	0	0	0	0	0	0	0	0	0	0	0	0	6	0	0	0	0	0	0	0	0	0	0	0	0	0	2	0
1102:24704:18202__S_053	Bacteria		Actinobacteria						0	0	0	2	0	0	0	0	0	0	0	0	0	2	0	0	0	0	0	0	0	1	3	0	0	0	0	0	0	0	0	3	0	1	0	0	0	0	0	0	0
1102:24784:7193__S_072	Bacteria		Actinobacteria						0	0	0	0	0	0	0	0	0	0	0	0	0	0	0	0	0	0	0	0	0	0	0	0	0	0	0	0	0	0	0	0	0	0	0	0	0	0	0	0	0
1102:26311:14558__S_008	Bacteria		Actinobacteria						0	0	0	0	0	0	0	0	0	0	0	0	0	0	0	0	0	0	0	0	0	0	0	0	0	0	0	0	0	0	0	0	0	0	0	0	0	0	0	0	0
1102:8482:8190__S_044	Bacteria		Actinobacteria						0	0	0	0	0	0	0	0	0	0	0	0	0	0	0	0	0	0	0	0	0	0	0	0	0	0	0	0	0	0	0	0	0	0	0	0	0	0	0	0	0
1101:11034:10059__S_129	Bacteria		Actinobacteria						0	0	0	0	0	0	0	0	0	0	0	0	0	0	0	0	0	0	0	0	0	0	0	0	0	0	0	0	0	0	0	0	0	0	0	0	0	0	0	0	0
1101:11170:21653__S_059	Bacteria		Actinobacteria						0	0	0	0	0	0	0	0	0	0	0	0	0	0	0	0	0	0	0	0	0	0	1	0	0	0	0	0	0	0	0	0	0	0	0	0	0	0	0	0	0
1101:11391:20184__S_085	Bacteria		Actinobacteria						0	0	0	0	0	0	0	0	0	0	0	0	0	0	0	0	0	0	0	0	0	0	0	0	0	0	0	0	0	0	0	0	0	0	0	0	0	0	0	0	0
1101:11561:13942__S_128	Bacteria		Actinobacteria						0	0	0	0	0	0	0	0	0	0	0	0	0	0	0	0	0	0	0	0	0	0	0	0	0	0	0	0	0	0	0	0	0	0	0	0	0	0	0	0	0
1101:13215:14755__S_015	Bacteria		Actinobacteria						0	0	0	0	0	0	0	0	0	0	0	0	0	0	0	0	0	0	0	0	0	0	0	0	0	0	0	0	0	0	0	0	0	0	0	0	0	0	0	0	0
1101:13884:18673__S_102	Bacteria		Actinobacteria						0	0	0	0	0	0	0	0	0	0	0	0	0	0	0	0	0	0	0	0	0	0	0	0	0	0	0	0	0	0	0	0	0	0	0	0	0	0	0	0	0
1101:15063:9143__S_129	Bacteria		Actinobacteria						0	0	0	0	0	0	0	0	0	0	0	0	0	0	0	0	0	0	0	0	0	0	0	0	0	0	0	0	0	0	0	0	0	0	0	0	0	0	0	0	0
1101:16640:6482__S_072	Bacteria		Actinobacteria						0	0	0	0	0	0	0	0	0	0	0	0	0	0	0	0	0	0	0	0	0	0	0	0	0	0	0	0	0	0	0	0	0	0	0	0	0	0	0	0	0
1101:16932:8200__S_041	Bacteria		Actinobacteria						0	0	0	0	0	0	0	0	0	0	0	0	0	0	0	0	0	0	0	0	0	0	0	0	0	0	0	0	0	0	0	0	0	0	0	0	0	0	0	0	0
1101:17788:3244__S_061	Bacteria		Actinobacteria						0	0	0	0	0	0	0	0	0	0	0	0	0	0	0	0	0	0	0	0	0	0	0	0	0	0	0	0	0	0	0	0	0	0	0	0	0	0	0	0	0
1101:18283:10629__S_121	Bacteria		Actinobacteria						0	0	0	0	0	0	0	0	0	0	0	0	0	0	0	0	0	0	0	0	0	0	0	0	0	0	0	0	0	0	0	0	0	0	0	0	0	0	0	0	0
1101:19455:19658__S_107	Bacteria		Actinobacteria						0	0	0	0	0	0	0	0	0	0	0	0	0	0	0	0	0	0	0	0	0	0	0	0	0	0	0	0	0	0	0	0	0	0	0	0	0	0	0	0	0
1101:19745:23843__S_035	Bacteria		Actinobacteria						0	0	0	0	0	0	0	0	0	0	0	0	0	0	0	0	0	0	0	0	0	0	0	0	0	0	0	0	0	0	0	0	0	0	0	0	0	0	0	0	0
1101:19904:18040__S_131	Bacteria		Actinobacteria						0	0	0	0	0	0	0	0	0	0	0	0	0	0	0	0	0	0	0	0	0	0	0	0	0	0	0	0	0	0	0	0	0	0	0	0	0	0	0	0	0
1101:20450:6936__S_025	Bacteria		Actinobacteria						0	0	0	0	0	0	0	0	0	0	0	0	0	1	0	0	0	0	0	0	0	0	0	0	0	0	0	0	0	0	0	0	0	0	0	0	0	0	0	0	0
1101:20543:27874__S_127	Bacteria		Actinobacteria						0	0	0	0	0	0	0	0	0	0	0	0	0	0	0	0	0	0	0	0	0	0	0	0	0	0	0	0	0	0	0	0	0	0	0	0	0	0	0	0	0
1101:21455:17508__R_013	Bacteria		Actinobacteria						0	0	0	0	0	0	0	0	0	0	0	0	1	0	0	0	0	0	0	0	0	0	0	0	0	0	0	0	0	0	0	0	0	0	0	0	0	0	0	0	0
1101:22188:3141__S_102	Bacteria		Actinobacteria						0	0	0	0	0	0	0	0	0	0	0	0	0	0	0	0	0	0	0	0	0	0	0	0	0	0	0	0	0	0	0	0	0	0	0	0	0	0	0	0	0
1101:22877:24673__S_005	Bacteria		Actinobacteria						0	0	0	0	0	0	0	0	0	0	0	0	0	0	0	0	0	0	0	0	0	0	0	0	0	0	0	0	0	0	0	0	0	0	0	0	0	0	0	0	0
1101:23795:14926__R_022	Bacteria		Actinobacteria						0	0	0	0	0	1	0	0	0	0	0	0	0	0	0	0	0	0	0	0	0	16	0	1	0	0	0	0	0	0	0	0	0	0	0	0	0	0	0	0	0
1101:24077:8991__S_012	Bacteria		Actinobacteria						0	0	0	0	0	0	0	0	0	0	0	0	0	0	0	0	0	0	0	0	0	0	0	0	0	0	0	0	0	0	0	0	0	0	0	0	0	0	0	0	0
1101:4266:12350__S_103	Bacteria		Actinobacteria						0	0	0	0	0	0	0	0	0	0	0	0	0	0	0	0	0	0	0	0	0	0	0	0	0	0	0	0	0	0	0	0	0	0	0	0	0	0	0	0	0
1101:5344:19116__S_064	Bacteria		Actinobacteria						0	0	0	0	0	0	0	0	0	0	0	0	0	0	0	0	0	0	0	0	0	0	0	0	0	0	0	0	0	0	0	0	0	0	0	0	0	0	0	0	0
1101:6914:13937__R_125	Bacteria		Actinobacteria						0	1	0	2	0	6	6	0	0	0	5	0	8	0	0	0	0	0	0	0	0	0	11	0	0	0	0	0	0	0	0	0	3	1	0	1	0	0	0	0	0
1101:7384:16064__S_035	Bacteria		Actinobacteria						0	0	0	0	0	0	0	0	0	0	0	0	0	0	0	0	0	0	0	0	0	0	0	0	0	0	0	0	0	0	0	0	0	0	0	0	0	0	0	0	0
1101:8334:4564__S_055	Bacteria		Actinobacteria						0	0	0	0	0	0	0	0	0	0	0	0	0	0	0	0	0	0	0	0	0	0	0	0	0	0	0	0	0	0	0	0	0	0	0	0	0	0	0	0	0
1102:10620:14905__S_095	Bacteria		Actinobacteria						0	0	0	0	0	1	0	0	0	0	0	0	0	0	0	0	0	0	0	0	0	0	0	1	0	0	1	0	0	1	0	0	1	0	0	0	0	0	1	0	0
1102:12152:16087__S_009	Bacteria		Actinobacteria						0	0	0	0	0	0	0	0	0	0	0	0	0	0	0	0	0	0	0	0	0	0	0	0	0	0	0	0	0	0	0	0	0	0	0	0	0	0	0	0	0
1102:13590:21547__S_041	Bacteria		Actinobacteria						0	0	0	4	0	2	0	0	0	0	5	0	0	0	0	0	0	0	0	0	0	0	0	0	0	0	0	0	0	0	0	0	0	0	0	0	0	0	0	0	0
1102:13645:4559__R_014	Bacteria		Actinobacteria						0	0	0	0	0	0	0	0	0	0	1	0	0	7	0	0	0	0	0	0	0	0	0	0	0	0	0	0	0	0	0	0	0	0	0	1	0	0	0	0	8
1102:13820:26086__S_053	Bacteria		Actinobacteria						0	0	0	0	0	0	0	0	0	0	0	0	0	0	0	0	0	0	0	0	0	0	0	0	0	0	0	0	0	0	0	0	0	0	0	0	0	0	0	0	0
1102:14540:14232__S_005	Bacteria		Actinobacteria						0	0	0	0	0	0	0	0	0	0	0	0	0	0	0	0	0	0	4	0	0	0	0	0	0	0	0	0	0	0	0	0	0	0	0	0	0	0	0	0	0
1102:15400:3053__S_045	Bacteria		Actinobacteria						0	0	0	0	0	0	0	0	0	0	0	0	0	0	0	0	0	0	0	0	0	0	0	0	0	0	0	0	0	0	0	0	0	0	0	0	0	0	0	0	0
1102:18687:13594__S_087	Bacteria		Actinobacteria						0	0	0	0	0	0	0	0	0	0	0	0	0	0	0	0	0	0	0	0	0	0	0	0	0	0	0	0	0	0	0	0	0	0	0	0	0	0	0	0	0
1102:20398:24410__R_083	Bacteria		Actinobacteria						0	0	0	0	0	1	0	0	0	0	0	0	1	0	0	0	0	0	0	0	0	0	0	0	0	0	0	0	0	0	0	0	0	0	0	0	0	0	0	0	1
1102:22349:17773__S_017	Bacteria		Actinobacteria						0	0	0	0	0	0	0	0	0	0	0	0	0	0	0	0	0	0	0	0	0	0	0	0	0	0	0	0	0	0	0	0	0	0	0	0	0	0	0	0	0
1102:26972:19209__S_087	Bacteria		Actinobacteria						0	0	0	0	0	0	0	0	0	0	0	0	0	0	0	0	0	0	0	0	0	0	0	0	0	0	0	0	0	0	0	0	0	0	0	0	0	0	0	0	0
1102:27475:10586__S_115	Bacteria		Actinobacteria						0	0	0	0	0	0	0	0	0	0	0	0	0	0	0	0	0	0	0	0	0	0	0	0	0	0	0	0	0	0	0	0	0	0	0	0	0	0	0	0	0
1102:5200:16355__S_005	Bacteria		Actinobacteria						0	0	0	0	0	0	0	0	0	0	0	0	0	0	0	0	0	0	0	0	0	0	0	0	0	0	0	0	0	0	0	0	0	0	0	0	0	0	0	0	0
1102:9685:17645__S_026	Bacteria		Actinobacteria						0	0	0	0	0	0	0	0	0	0	0	0	0	0	0	0	0	0	0	0	0	0	0	0	0	0	0	0	0	0	0	0	0	0	0	0	0	0	0	0	0
1103:16143:13506__S_100	Bacteria		Actinobacteria						0	0	0	0	0	0	0	0	0	0	0	0	2	0	0	0	0	0	0	0	0	0	0	0	0	0	0	0	0	0	0	0	0	1	0	0	0	0	0	0	0
1103:16698:23146__S_096	Bacteria		Actinobacteria						0	0	0	0	0	0	0	0	0	0	0	0	0	0	0	0	0	0	0	0	0	0	0	0	0	0	0	0	0	0	0	0	0	0	0	0	0	0	0	0	0
1103:19429:11061__S_095	Bacteria		Actinobacteria						0	0	0	1	0	0	0	0	0	0	2	0	0	0	0	0	0	0	0	0	0	0	0	0	0	0	0	0	0	1	0	0	0	0	0	0	0	0	0	0	0
1103:19681:9625__S_005	Bacteria		Actinobacteria						0	0	0	0	0	0	0	0	0	0	0	0	0	0	0	0	0	0	0	0	0	0	0	0	0	0	0	0	0	0	0	0	0	0	0	0	0	0	0	0	0
1103:21146:5258__S_087	Bacteria		Actinobacteria						0	0	0	0	0	0	0	0	0	0	0	0	0	0	0	0	0	0	0	0	0	0	0	0	0	0	0	0	0	0	0	0	0	0	0	0	0	0	0	0	0
1103:22885:14063__S_051	Bacteria		Actinobacteria						0	0	0	0	0	0	0	0	0	0	0	0	0	0	0	0	0	0	0	0	0	0	0	0	0	0	0	0	0	0	0	0	0	0	0	0	0	0	0	0	0
1103:24274:5200__S_040	Bacteria		Actinobacteria						0	0	0	0	0	0	0	0	0	0	0	0	0	0	0	0	0	0	0	0	0	0	0	0	0	0	0	0	0	1	0	0	0	0	0	0	0	0	0	0	0
1103:9600:15869__S_107	Bacteria		Actinobacteria						0	0	0	0	0	0	0	0	0	0	0	0	0	0	0	0	0	0	0	0	0	0	0	0	0	0	0	0	0	0	0	0	0	0	0	0	0	0	0	0	0
1104:10646:20573__S_055	Bacteria		Actinobacteria						0	0	0	0	0	0	0	0	0	0	0	0	0	0	0	0	0	0	0	0	0	0	0	0	0	0	0	0	0	0	0	0	0	0	0	0	0	0	0	0	0
1104:16552:24845__S_006	Bacteria		Actinobacteria						0	0	0	0	0	0	0	0	6	0	1	0	0	0	0	0	3	1	6	0	0	0	0	0	0	0	0	0	0	1	0	0	2	0	0	0	0	0	0	0	0
1104:20405:21707__S_005	Bacteria		Actinobacteria						0	0	0	0	0	0	0	0	2	0	0	0	0	0	0	0	0	0	0	0	0	0	0	0	0	0	0	0	0	0	0	0	0	0	0	0	0	0	0	0	0
1104:22632:7780__S_075	Bacteria		Actinobacteria						0	0	0	0	0	0	0	0	0	0	0	0	0	0	0	0	0	0	0	0	0	0	0	0	0	0	0	0	0	0	0	0	0	0	0	0	0	0	0	0	0
1104:26140:10795__S_030	Bacteria		Actinobacteria						0	0	0	0	0	0	0	0	0	0	0	0	0	0	0	0	0	0	0	0	0	0	0	0	0	0	0	0	0	0	0	0	0	0	0	0	0	0	0	0	0
1104:26504:12151__S_122	Bacteria		Actinobacteria						0	0	0	0	0	0	0	0	0	0	0	0	0	0	0	0	0	0	0	0	0	0	0	0	0	0	0	0	0	0	0	0	0	0	0	0	0	0	0	0	0
1104:3063:14399__R_050	Bacteria		Actinobacteria						0	0	0	0	0	0	0	0	0	0	0	0	0	0	0	0	0	0	0	0	0	0	0	0	0	0	0	0	0	0	0	0	0	0	0	0	0	0	0	0	0
1104:3345:9944__S_047	Bacteria		Actinobacteria						0	0	0	0	0	1	0	0	0	0	0	0	0	0	3	6	0	0	1	0	0	0	0	0	0	1	1	0	0	0	0	0	0	3	0	0	0	0	0	0	0
1104:4636:11695__S_024	Bacteria		Actinobacteria						0	0	0	0	0	0	0	0	0	0	0	0	0	0	0	0	0	0	0	0	0	0	0	0	0	0	0	0	0	0	0	0	0	0	0	0	0	0	0	0	0
2101:10338:22464__S_048	Bacteria		Actinobacteria						0	0	0	0	0	1	0	0	0	0	0	0	0	0	0	0	0	0	0	0	0	0	0	0	0	0	0	0	0	0	0	0	0	0	0	0	0	0	0	0	0
2101:13275:13335__S_108	Bacteria		Actinobacteria						0	0	0	0	0	0	0	0	0	0	0	0	0	0	0	0	2	0	0	0	0	0	0	0	0	0	0	2	0	0	0	0	0	0	0	0	0	0	0	0	0
2101:14049:3710__S_024	Bacteria		Actinobacteria						0	0	0	1	6	0	0	0	0	0	0	0	0	0	0	0	0	0	0	0	0	0	0	0	0	0	0	0	0	0	0	0	0	0	0	0	0	0	0	0	0
2101:14789:2918__S_042	Bacteria		Actinobacteria						0	0	0	0	0	0	0	0	0	0	0	0	0	0	0	0	0	0	0	0	0	0	0	0	0	0	0	0	0	0	0	0	0	0	0	0	0	0	0	0	0
2101:15778:5125__S_054	Bacteria		Actinobacteria						0	0	0	0	0	0	0	0	0	0	0	0	0	0	0	0	0	0	0	0	0	0	0	0	0	0	0	0	0	0	0	0	0	0	0	0	0	0	0	0	0
2101:21837:11389__S_095	Bacteria		Actinobacteria						0	0	0	0	0	0	0	0	0	0	0	0	0	0	0	0	0	0	0	0	0	0	0	0	0	0	0	0	0	0	0	0	0	0	0	0	0	0	0	0	0
2101:22329:23820__S_016	Bacteria		Actinobacteria						0	0	0	0	0	0	0	0	0	0	0	0	0	0	0	0	0	0	0	0	0	0	0	0	0	0	0	0	0	0	0	0	0	0	0	0	0	0	0	0	0
2101:23502:20750__S_049	Bacteria		Actinobacteria						0	0	0	0	0	0	0	0	0	0	0	0	0	0	0	0	0	0	0	0	0	0	0	0	0	0	0	0	0	0	0	0	0	0	0	0	0	0	0	0	0
2101:24683:23218__S_058	Bacteria		Actinobacteria						0	0	0	0	0	0	0	0	0	0	0	0	0	0	0	0	0	0	0	0	0	0	0	0	0	0	0	0	0	0	0	0	0	0	0	0	0	0	0	0	0
2102:10548:11761__S_125	Bacteria		Actinobacteria						0	0	0	1	0	0	0	0	0	0	0	0	0	0	0	0	0	0	0	0	0	0	0	0	0	0	0	0	0	0	0	0	0	0	0	0	0	0	0	0	0
2102:19631:19056__S_109	Bacteria		Actinobacteria						0	0	0	0	0	0	0	0	0	0	0	0	0	0	0	0	0	0	0	0	0	0	0	0	0	0	0	0	0	0	0	0	0	0	0	0	0	0	0	0	0
2102:24146:11842__S_063	Bacteria		Actinobacteria						0	0	0	0	0	0	0	0	0	0	0	0	0	0	0	0	0	0	0	0	0	0	0	0	0	0	0	0	0	0	0	0	0	0	0	0	0	0	0	0	0
2102:8777:22021__S_059	Bacteria		Actinobacteria						0	0	0	0	0	0	0	0	0	0	0	0	0	0	0	0	0	0	0	0	0	0	0	0	0	0	0	0	0	0	0	0	0	0	0	0	0	0	0	0	0
2103:12618:10296__S_005	Bacteria		Actinobacteria						0	0	0	0	0	0	0	0	0	0	0	0	0	0	0	0	0	0	0	0	0	0	0	1	0	1	0	0	0	0	0	0	0	0	0	0	0	0	0	0	0
2103:13691:7115__S_063	Bacteria		Actinobacteria						0	0	0	0	0	0	0	0	0	0	0	0	0	0	0	0	0	0	0	0	0	0	0	0	0	0	0	0	0	0	0	0	0	0	0	0	0	0	0	0	0
2103:18443:24188__S_065	Bacteria		Actinobacteria						0	0	0	0	0	0	0	0	0	0	0	0	0	0	0	0	0	0	0	0	0	0	0	0	0	0	0	0	0	0	0	0	0	0	0	0	0	0	0	0	0
2103:18562:7566__S_081	Bacteria		Actinobacteria						0	0	0	0	0	0	0	0	0	0	0	0	0	0	0	0	0	0	0	0	0	0	0	0	0	0	0	0	0	0	0	0	0	0	0	0	0	0	0	0	0
2103:22000:10791__S_024	Bacteria		Actinobacteria						0	0	0	0	0	0	0	0	0	0	0	0	0	0	0	0	0	0	0	0	0	0	0	0	0	0	0	0	0	0	0	0	0	0	0	0	0	0	0	0	0
2103:23657:9533__S_087	Bacteria		Actinobacteria						0	0	0	0	0	0	0	0	0	0	0	0	0	0	0	0	0	0	0	0	0	0	0	0	0	0	0	0	0	0	0	0	0	0	0	0	0	0	0	0	0
2103:2479:19557__S_113	Bacteria		Actinobacteria						1	0	0	0	1	0	0	0	0	0	0	0	0	0	0	0	0	0	0	0	0	0	0	0	0	0	0	0	0	0	0	0	0	0	1	0	0	0	0	0	0
2103:6809:16251__S_087	Bacteria		Actinobacteria						0	0	0	0	0	0	0	0	0	0	0	0	0	0	0	0	0	0	0	0	0	0	0	0	0	0	0	0	0	0	0	0	0	0	0	0	0	0	0	0	0
2104:10472:18031__S_009	Bacteria		Actinobacteria						0	0	3	0	0	0	0	0	0	0	0	0	0	7	0	0	0	0	0	0	0	0	0	0	0	0	0	0	0	0	0	0	0	0	0	0	0	3	0	0	0
2104:11499:27013__S_045	Bacteria		Actinobacteria						0	0	0	0	0	0	0	0	0	0	0	0	0	0	0	0	0	0	0	0	0	0	0	0	0	0	0	0	0	0	0	0	0	0	0	0	0	0	0	0	0
2104:17685:20285__S_085	Bacteria		Actinobacteria						0	0	0	0	0	0	0	0	0	0	0	0	0	0	0	0	0	0	0	0	0	0	0	0	0	0	0	0	0	0	0	0	0	0	0	0	0	0	0	0	0
2104:21287:16908__R_041	Bacteria		Actinobacteria						0	0	0	0	0	0	0	0	0	0	0	0	0	0	0	0	0	0	0	0	0	0	0	0	0	0	0	0	0	0	0	0	0	0	0	0	0	0	0	0	6
2104:22570:18679__S_057	Bacteria		Actinobacteria						0	0	0	0	0	0	0	0	0	0	0	0	0	0	0	0	0	0	0	0	0	0	0	0	0	0	0	0	0	0	0	0	0	0	0	0	0	0	0	0	0
2104:22938:14710__S_086	Bacteria		Actinobacteria						0	0	0	0	0	0	0	0	0	0	0	0	0	0	0	0	0	0	0	0	0	0	0	0	0	0	0	0	0	0	0	1	0	0	0	0	0	0	0	0	0
2104:25099:6606__S_038	Bacteria		Actinobacteria						0	0	0	0	0	1	0	0	0	0	0	0	0	0	0	0	0	0	0	0	0	0	0	0	0	0	9	0	0	0	0	0	0	1	0	0	0	0	0	0	1
1104:22297:17118__R_064	Bacteria		Bacteroidetes	Bacteroidia	Bacteroidales	Prevotellaceae	Prevotella		0	0	0	0	0	0	0	0	0	0	0	0	0	0	0	0	0	0	0	0	0	0	0	0	0	0	0	0	0	0	0	0	0	0	0	0	0	0	0	0	0
1102:12782:11394__R_032	Bacteria		Bacteroidetes	Chitinophagia	Chitinophagales	Chitinophagaceae	Chitinophaga	uncultured Chitinophaga sp.	0	0	0	0	0	0	0	0	0	0	0	0	0	0	0	0	0	0	0	0	0	0	0	0	0	2	0	0	1	0	0	59	9	0	0	0	0	0	0	0	0
1101:12064:26040__R_040	Bacteria		Bacteroidetes	Chitinophagia	Chitinophagales	Chitinophagaceae	Chitinophaga		0	0	0	0	0	0	0	0	0	9	0	0	0	0	8	0	0	0	0	0	4	0	0	0	13	0	0	0	0	0	0	1	0	0	0	26	0	0	0	433	0
1101:13364:9873__S_122	Bacteria		Bacteroidetes	Chitinophagia	Chitinophagales	Chitinophagaceae	Chitinophaga		0	0	0	0	0	0	0	0	0	2	2	0	0	2	1	0	0	0	0	0	0	0	0	0	0	0	0	0	0	0	0	0	1	0	0	0	0	0	0	1	0
1103:12589:14828__S_031	Bacteria		Bacteroidetes	Chitinophagia	Chitinophagales	Chitinophagaceae	Chitinophaga		0	0	0	4	0	0	0	0	0	0	0	0	0	0	0	0	0	0	0	0	0	0	0	0	0	0	0	0	0	0	0	0	0	0	0	0	0	0	0	0	0
1101:28661:13637__S_064	Bacteria		Bacteroidetes	Chitinophagia	Chitinophagales	Chitinophagaceae	Ferruginibacter	uncultured Ferruginibacter sp.	0	0	0	0	0	0	0	0	0	0	0	0	0	0	0	0	0	0	0	0	0	0	0	0	0	0	0	0	0	0	0	0	0	0	0	0	0	0	0	0	0
1102:21941:8574__R_015	Bacteria		Bacteroidetes	Chitinophagia	Chitinophagales	Chitinophagaceae	Ferruginibacter	uncultured Ferruginibacter sp.	0	0	1	0	1	0	0	0	1	1	3	2	0	2	16	0	0	0	0	0	0	0	0	0	0	0	0	0	0	0	0	0	0	0	0	0	0	0	0	16	0
1102:18728:23288__S_077	Bacteria		Bacteroidetes	Chitinophagia	Chitinophagales	Chitinophagaceae	Ferruginibacter		0	0	0	0	0	0	0	0	0	0	0	0	0	0	0	0	0	0	0	0	0	0	0	0	0	0	0	0	0	0	0	0	0	0	0	0	0	0	0	0	0
1101:21516:20599__R_028	Bacteria		Bacteroidetes	Chitinophagia	Chitinophagales	Chitinophagaceae	Flavisolibacter	uncultured Flavisolibacter sp.	0	0	2	0	0	0	0	0	0	0	0	0	0	0	0	8	0	0	0	0	0	0	0	0	0	0	0	51	0	0	0	0	0	0	0	0	0	0	0	10	0
1101:14614:3153__S_068	Bacteria		Bacteroidetes	Chitinophagia	Chitinophagales	Chitinophagaceae	Flavisolibacter	uncultured Flavisolibacter sp.	0	0	0	0	0	0	0	0	0	0	0	0	0	1	0	0	0	0	0	0	0	0	0	0	0	0	0	0	0	2	0	0	0	0	0	0	0	0	0	0	0
1101:20734:4714__S_075	Bacteria		Bacteroidetes	Chitinophagia	Chitinophagales	Chitinophagaceae	Flavisolibacter	uncultured Flavisolibacter sp.	0	0	0	0	0	0	0	0	0	0	0	0	0	0	0	0	0	0	0	0	0	0	0	0	0	0	0	0	0	0	0	0	0	0	0	0	0	0	0	0	0
1102:12316:26301__S_008	Bacteria		Bacteroidetes	Chitinophagia	Chitinophagales	Chitinophagaceae	Flavisolibacter	uncultured Flavisolibacter sp.	0	0	0	0	0	0	0	0	0	0	0	0	0	0	0	0	0	0	0	0	0	0	0	0	0	0	0	0	0	0	0	0	0	0	0	0	0	0	0	0	0
1102:3594:17248__R_042	Bacteria		Bacteroidetes	Chitinophagia	Chitinophagales	Chitinophagaceae	Flavisolibacter		0	0	0	0	0	0	0	0	0	0	0	0	0	0	0	0	0	0	0	0	0	0	0	0	0	0	0	0	0	0	0	0	0	0	0	0	0	0	0	0	0
1101:22413:4501__S_007	Bacteria		Bacteroidetes	Chitinophagia	Chitinophagales	Chitinophagaceae	Lacibacter	uncultured Lacibacter sp.	0	0	0	0	0	0	0	0	0	0	0	0	0	0	0	0	0	0	0	0	0	0	0	0	0	0	0	0	0	0	0	0	0	0	0	0	0	0	0	0	0
1103:23848:9110__S_025	Bacteria		Bacteroidetes	Chitinophagia	Chitinophagales	Chitinophagaceae	Lacibacter	uncultured Lacibacter sp.	0	0	0	0	0	0	0	0	0	0	0	0	0	0	0	0	0	0	0	0	0	0	0	0	0	0	0	0	0	0	0	0	0	0	0	0	0	0	0	0	0
1102:12787:27477__R_057	Bacteria		Bacteroidetes	Chitinophagia	Chitinophagales	Chitinophagaceae	Niastella		0	1	0	0	1	0	0	0	0	1	0	0	1	0	0	2	0	0	0	0	0	0	0	0	1	0	1	24	0	3	0	0	3	0	0	2	0	0	0	0	1
1101:6350:14381__R_015	Bacteria		Bacteroidetes	Chitinophagia	Chitinophagales	Chitinophagaceae	Niastella		23	59	210	1	133	28	15	66	0	42	36	7	63	213	766	12	0	0	70	7	1	20	0	0	494	0	11	54	2	129	0	206	32	162	60	1	19	98	248	119	42
2101:13683:4689__S_079	Bacteria		Bacteroidetes	Chitinophagia	Chitinophagales	Chitinophagaceae	Sediminibacterium		0	0	0	0	0	0	0	0	0	0	0	0	0	0	0	0	0	0	0	0	0	0	0	0	0	0	0	0	0	0	0	0	0	0	0	0	0	0	0	0	0
1103:18539:14434__R_040	Bacteria		Bacteroidetes	Chitinophagia	Chitinophagales	Chitinophagaceae	Taibaiella		0	19	2	5	0	9	0	70	0	28	0	0	0	11	1	0	0	0	0	0	1	0	0	0	0	2	18	0	0	14	0	0	0	28	0	1	5	0	0	384	1
1101:13916:5487__R_108	Bacteria		Bacteroidetes	Chitinophagia	Chitinophagales	Chitinophagaceae			0	0	0	4	0	2	0	0	0	0	0	0	0	0	0	0	0	0	1	2	3	0	28	0	0	14	0	0	0	1	0	0	1	0	11	1	0	0	0	0	12
1101:15675:25123__S_072	Bacteria		Bacteroidetes	Chitinophagia	Chitinophagales	Chitinophagaceae			0	0	0	0	0	0	0	32	0	0	0	0	0	36	0	0	0	0	0	0	0	0	0	0	0	0	0	0	0	0	0	0	0	0	0	0	0	0	0	11	0
1101:16201:9418__S_028	Bacteria		Bacteroidetes	Chitinophagia	Chitinophagales	Chitinophagaceae			0	0	0	0	6	0	0	0	0	0	0	0	0	0	0	0	0	0	0	0	0	0	0	0	0	0	0	0	0	0	0	0	0	0	0	0	0	0	0	0	0
1101:16965:11284__R_005	Bacteria		Bacteroidetes	Chitinophagia	Chitinophagales	Chitinophagaceae			0	0	0	0	1	0	0	1	0	1	0	0	0	0	0	0	0	0	0	1	0	0	0	0	0	0	0	0	0	0	0	0	0	1	0	0	0	1	0	0	0
1101:20756:9481__S_063	Bacteria		Bacteroidetes	Chitinophagia	Chitinophagales	Chitinophagaceae			0	0	0	0	0	0	0	0	0	0	0	0	0	0	0	0	0	0	0	0	0	0	0	0	0	0	0	0	0	0	0	0	0	0	0	0	0	0	0	0	0
1102:12180:12656__S_077	Bacteria		Bacteroidetes	Chitinophagia	Chitinophagales	Chitinophagaceae			0	0	0	0	0	0	0	0	0	0	0	0	0	0	0	0	0	0	0	0	0	0	0	0	0	0	0	0	0	0	0	0	0	0	0	0	0	0	0	0	0
1102:18877:11378__R_014	Bacteria		Bacteroidetes	Chitinophagia	Chitinophagales	Chitinophagaceae			0	0	0	0	0	0	0	5	0	0	0	0	0	9	0	0	4	0	0	0	0	0	0	0	0	0	2	0	0	0	0	0	0	0	0	0	0	0	0	0	0
1102:8393:10587__S_067	Bacteria		Bacteroidetes	Chitinophagia	Chitinophagales	Chitinophagaceae			0	0	0	0	0	0	0	0	0	0	0	0	0	0	0	0	0	0	0	0	0	0	0	0	0	0	0	0	0	0	0	0	0	0	0	0	0	0	0	0	0
1101:13027:24054__S_061	Bacteria		Bacteroidetes	Chitinophagia	Chitinophagales	Chitinophagaceae			0	0	0	0	0	0	0	0	0	0	0	0	0	0	0	1	0	0	0	0	0	0	0	0	0	0	0	0	0	0	0	0	0	0	0	0	0	0	0	0	0
1102:14838:4259__S_077	Bacteria		Bacteroidetes	Chitinophagia	Chitinophagales	Chitinophagaceae			0	0	0	0	0	0	0	0	0	0	0	0	0	0	0	0	0	0	0	0	0	0	0	0	0	0	0	0	0	0	0	0	0	0	0	0	0	0	0	0	0
1102:5326:9738__S_013	Bacteria		Bacteroidetes	Chitinophagia	Chitinophagales	Chitinophagaceae			0	0	0	0	0	0	0	0	0	0	0	0	0	0	0	0	0	0	0	0	0	0	0	0	0	0	0	0	0	0	0	0	0	0	0	0	0	0	0	0	0
1103:4404:17955__R_008	Bacteria		Bacteroidetes	Chitinophagia	Chitinophagales	Chitinophagaceae			0	0	2	0	9	0	0	21	0	0	0	0	0	0	0	0	0	0	0	0	0	0	0	0	0	0	0	0	0	0	0	0	0	0	0	0	12	0	0	6	0
1104:10695:28130__S_035	Bacteria		Bacteroidetes	Chitinophagia	Chitinophagales	Chitinophagaceae			0	0	1	0	0	0	0	0	0	0	0	0	0	0	0	0	0	0	0	0	0	0	0	0	0	0	0	0	0	0	0	0	0	0	0	0	0	0	0	0	0
2101:16185:19087__S_074	Bacteria		Bacteroidetes	Chitinophagia	Chitinophagales	Chitinophagaceae			0	0	0	0	0	0	0	0	0	0	0	0	0	0	0	0	0	0	0	0	0	0	0	0	0	0	0	0	0	0	0	0	0	0	0	0	0	0	0	0	0
2101:18585:23600__R_091	Bacteria		Bacteroidetes	Chitinophagia	Chitinophagales	Chitinophagaceae			0	0	0	0	0	0	0	0	0	0	0	0	0	0	0	0	0	0	0	0	0	0	0	0	0	0	0	0	0	0	0	0	0	0	0	0	0	0	0	0	0
2102:22791:10028__R_038	Bacteria		Bacteroidetes	Chitinophagia	Chitinophagales	Chitinophagaceae			91	149	40	207	133	392	455	72	101	79	269	47	278	134	148	33	395	459	461	240	216	452	853	701	850	454	740	204	28	419	32	466	638	386	435	166	57	1198	740	208	747
1101:28542:12697__S_008	Bacteria		Bacteroidetes	Chitinophagia	Chitinophagales				0	0	2	0	0	0	0	0	0	0	0	0	0	0	0	0	0	0	0	0	0	0	0	0	0	0	0	0	0	0	0	0	0	0	0	0	0	0	0	0	0
1101:11323:25897__S_081	Bacteria		Bacteroidetes	Chitinophagia	Chitinophagales				0	0	0	0	0	0	0	0	0	0	0	0	0	0	0	0	0	0	0	0	0	0	0	0	0	0	0	0	0	0	0	0	0	0	0	0	0	0	0	0	0
1103:16363:7090__S_021	Bacteria		Bacteroidetes	Chitinophagia	Chitinophagales				0	0	0	0	0	0	0	0	0	0	0	0	0	0	0	0	0	0	1	0	0	0	0	0	0	0	0	0	0	0	0	0	0	0	0	0	0	0	0	0	0
1101:7156:18391__R_008	Bacteria		Bacteroidetes	Cytophagia	Cytophagales	Cytophagaceae	Cytophaga		2	0	0	0	0	0	1	5	0	0	0	0	0	0	0	0	0	0	0	0	0	0	0	0	0	0	0	0	0	0	0	0	0	0	0	0	0	0	0	0	0
1101:17520:20861__R_014	Bacteria		Bacteroidetes	Cytophagia	Cytophagales	Cytophagaceae	Cytophaga		0	0	0	0	11	0	0	0	0	0	0	0	0	40	0	0	0	0	0	0	0	0	0	0	0	0	1	0	0	0	0	0	0	0	0	11	0	0	0	0	0
1102:12614:3759__S_121	Bacteria		Bacteroidetes	Cytophagia	Cytophagales	Cytophagaceae	Cytophaga		0	0	0	0	0	0	0	0	0	0	0	0	0	0	0	0	0	0	0	0	0	0	0	0	0	0	0	0	0	0	0	0	0	0	0	0	0	0	0	0	0
1101:19361:10897__R_041	Bacteria		Bacteroidetes	Cytophagia	Cytophagales	Cytophagaceae	Dyadobacter	Dyadobacter fermentans	0	0	0	1	2	0	0	0	0	0	0	0	0	0	0	0	0	0	0	0	0	0	0	0	1	0	0	0	0	0	0	0	0	0	0	0	0	0	0	0	11
1102:18911:4008__R_091	Bacteria		Bacteroidetes	Cytophagia	Cytophagales	Cytophagaceae	Dyadobacter		0	0	0	0	0	0	0	0	0	0	0	0	0	0	0	0	0	0	0	0	0	0	0	0	0	0	0	0	0	0	0	0	0	0	0	0	0	0	0	0	0
1101:14639:4258__S_077	Bacteria		Bacteroidetes	Cytophagia	Cytophagales	Cytophagaceae	Ohtaekwangia	uncultured Ohtaekwangia sp.	0	0	0	0	0	0	0	0	0	0	0	0	0	0	0	0	0	0	0	0	0	0	0	0	0	0	0	0	0	0	0	0	0	0	0	0	0	0	0	0	0
1101:24538:25829__S_007	Bacteria		Bacteroidetes	Cytophagia	Cytophagales	Cytophagaceae	Ohtaekwangia	uncultured Ohtaekwangia sp.	0	0	10	0	0	0	0	7	0	0	0	0	0	0	0	0	0	0	0	0	0	0	0	0	0	0	0	0	0	0	0	0	0	0	0	0	0	0	0	0	0
1102:20649:24246__S_053	Bacteria		Bacteroidetes	Cytophagia	Cytophagales	Cytophagaceae	Ohtaekwangia	uncultured Ohtaekwangia sp.	0	0	0	0	0	0	0	0	0	0	0	0	0	0	0	0	0	0	0	0	0	0	0	0	0	0	0	0	0	0	0	1	0	0	0	0	0	0	0	0	0
1102:21088:20887__R_005	Bacteria		Bacteroidetes	Cytophagia	Cytophagales	Cytophagaceae	Ohtaekwangia	uncultured Ohtaekwangia sp.	0	0	0	0	13	0	0	0	0	0	0	0	0	0	0	0	0	0	0	0	0	0	0	0	0	0	0	0	0	0	0	0	0	0	0	0	0	0	0	0	0
1102:23454:25049__S_100	Bacteria		Bacteroidetes	Cytophagia	Cytophagales	Cytophagaceae	Ohtaekwangia	uncultured Ohtaekwangia sp.	0	0	0	0	0	0	0	0	0	0	0	0	0	0	0	0	0	0	0	0	0	0	0	0	0	0	0	0	0	0	0	0	0	0	0	0	1	0	0	0	0
1101:13271:13971__R_099	Bacteria		Bacteroidetes	Cytophagia	Cytophagales	Cytophagaceae	Siphonobacter		0	0	0	1	0	0	0	22	0	0	0	0	8	56	0	0	0	0	0	0	0	0	0	0	0	0	0	0	0	0	0	0	0	0	0	0	0	0	0	15	0
1103:21304:19618__R_067	Bacteria		Bacteroidetes	Cytophagia	Cytophagales	Cytophagaceae	Spirosoma		0	0	0	0	0	0	0	0	0	0	0	0	0	0	0	0	0	0	0	0	0	0	0	0	0	0	0	0	0	0	0	0	0	0	0	0	0	0	0	0	0
1101:11229:6445__S_098	Bacteria		Bacteroidetes	Cytophagia	Cytophagales	Cytophagaceae			0	0	0	0	0	0	0	0	0	0	0	0	0	0	0	0	0	0	0	0	0	0	0	0	0	0	0	0	0	0	0	0	0	0	0	0	0	0	0	0	0
1101:13837:28322__R_103	Bacteria		Bacteroidetes	Cytophagia	Cytophagales	Cytophagaceae			0	0	2	0	0	0	0	0	0	0	0	0	0	0	0	0	0	0	0	0	0	0	0	0	0	0	0	0	0	0	0	0	0	0	0	0	0	0	0	0	0
1101:16724:4243__R_014	Bacteria		Bacteroidetes	Cytophagia	Cytophagales	Cytophagaceae			0	0	0	2	0	0	0	0	0	0	1	0	1	51	0	0	0	0	0	0	0	0	0	0	0	0	0	0	0	0	0	0	0	0	0	0	0	0	0	0	0
1101:24024:22837__R_003	Bacteria		Bacteroidetes	Cytophagia	Cytophagales	Cytophagaceae			0	0	80	0	0	0	0	2	0	0	0	0	1	0	0	0	0	0	0	0	0	0	0	0	0	0	0	0	0	0	0	0	0	0	0	0	0	0	0	0	0
1102:26988:17167__S_057	Bacteria		Bacteroidetes	Cytophagia	Cytophagales	Cytophagaceae			0	0	0	0	0	0	0	0	0	0	0	0	0	0	0	0	0	0	0	0	0	0	0	0	0	0	0	0	0	0	0	0	0	0	0	0	0	0	0	0	0
1102:16252:5338__S_023	Bacteria		Bacteroidetes	Cytophagia	Cytophagales	Cytophagaceae			0	0	0	0	0	0	0	0	0	0	0	0	0	0	0	0	0	0	0	0	0	0	0	0	0	0	0	0	0	0	0	0	0	0	0	1	0	0	0	0	0
2104:16293:15452__R_099	Bacteria		Bacteroidetes	Cytophagia	Cytophagales	Cytophagaceae			0	0	3	0	2	0	0	0	0	0	0	0	0	0	0	0	0	0	0	0	0	0	0	0	0	0	0	0	0	0	0	0	0	0	0	0	0	0	0	0	0
1102:10563:9418__R_007	Bacteria		Bacteroidetes	Cytophagia	Cytophagales	Hymenobacteraceae	Hymenobacter		0	0	0	0	3	0	7	0	0	0	0	0	0	0	0	0	0	0	0	0	0	0	0	0	0	0	0	0	0	0	0	0	0	0	0	0	0	0	0	0	0
1101:12729:14534__R_019	Bacteria		Bacteroidetes	Cytophagia	Cytophagales				0	0	0	0	0	0	7	0	0	0	0	0	2	0	0	0	6	0	75	0	0	0	0	0	0	0	0	0	0	0	0	0	2	0	0	1	0	0	0	0	0
1101:12812:27264__R_099	Bacteria		Bacteroidetes	Cytophagia	Cytophagales				0	0	0	0	0	0	0	21	0	0	0	0	0	0	0	0	0	0	0	0	0	0	0	0	0	0	0	0	0	0	0	0	0	0	0	0	0	0	0	0	0
1101:15006:20592__S_014	Bacteria		Bacteroidetes	Cytophagia	Cytophagales				0	0	0	0	0	0	0	0	0	0	0	0	0	0	0	0	0	0	0	0	0	0	0	0	0	0	0	0	0	0	0	0	0	0	0	0	0	0	0	0	0
1102:8009:16539__R_103	Bacteria		Bacteroidetes	Cytophagia	Cytophagales				0	0	0	2	0	0	0	1	0	0	0	0	0	0	0	0	0	0	0	0	0	0	0	10	0	0	0	0	0	0	0	0	0	0	0	0	0	1	0	0	7
1101:15759:19143__R_075	Bacteria		Bacteroidetes	Cytophagia	Cytophagales				0	0	0	0	0	0	0	0	0	2	0	1	4	0	0	11	0	0	0	0	0	2	1	0	0	0	0	0	0	0	0	0	0	0	0	0	0	0	0	0	0
1102:17760:23778__R_034	Bacteria		Bacteroidetes	Cytophagia	Cytophagales				0	0	0	0	0	0	0	0	0	0	0	0	0	0	0	0	0	0	0	0	0	0	0	0	0	0	0	0	0	0	0	0	0	5	0	0	0	0	0	0	0
1102:26168:6412__S_080	Bacteria		Bacteroidetes	Cytophagia	Cytophagales				0	0	0	0	0	0	0	0	0	0	0	0	0	0	0	0	0	0	0	0	0	0	0	0	0	0	0	0	0	0	0	0	0	0	0	0	0	0	0	0	0
1102:29244:11835__S_014	Bacteria		Bacteroidetes	Cytophagia	Cytophagales				0	0	0	0	0	0	0	0	0	0	0	0	0	0	0	0	0	0	0	0	0	0	0	0	0	0	0	0	0	0	0	0	0	0	0	0	0	0	0	0	0
1103:11000:2778__R_118	Bacteria		Bacteroidetes	Cytophagia	Cytophagales				0	0	0	0	0	0	0	0	0	0	0	0	0	0	0	0	6	0	0	0	0	0	5	0	0	0	0	0	0	9	0	0	0	0	0	0	0	0	0	0	0
2102:23076:16456__S_063	Bacteria		Bacteroidetes	Cytophagia	Cytophagales				0	0	0	0	0	0	0	0	0	0	0	0	0	0	0	0	0	0	0	0	0	0	0	0	0	0	0	0	0	0	0	0	0	0	0	0	0	0	0	0	0
1101:8405:18708__S_076	Bacteria		Bacteroidetes	Flavobacteriia	Flavobacteriales	Crocinitomicaceae	Fluviicola		0	0	0	0	0	0	0	0	0	0	0	0	0	0	0	0	0	0	0	0	0	0	0	0	0	0	0	0	0	0	0	0	0	0	0	0	0	0	0	0	0
1101:12159:8775__R_108	Bacteria		Bacteroidetes	Flavobacteriia	Flavobacteriales	Flavobacteriaceae	Chryseobacterium		0	0	0	7	0	0	0	11	0	0	1	0	0	24	0	0	0	0	0	2	0	0	0	0	0	1	0	0	0	0	0	0	0	0	0	0	0	0	0	10	0
1104:20264:15866__R_014	Bacteria		Bacteroidetes	Flavobacteriia	Flavobacteriales	Flavobacteriaceae	Chryseobacterium		0	0	0	0	6	0	1	0	0	0	0	0	0	362	0	0	0	0	0	0	0	0	0	0	0	0	0	0	0	0	0	0	0	0	0	0	0	0	5	0	31
1102:14120:21885__S_111	Bacteria		Bacteroidetes	Flavobacteriia	Flavobacteriales	Flavobacteriaceae	Flavobacterium	uncultured Flavobacterium sp.	0	0	0	0	0	0	0	0	0	0	0	0	0	0	0	0	0	0	0	0	0	0	0	0	0	0	0	0	0	0	0	0	0	0	0	0	0	0	0	0	0
1101:12178:5512__R_091	Bacteria		Bacteroidetes	Flavobacteriia	Flavobacteriales	Flavobacteriaceae	Flavobacterium		0	0	0	0	0	0	0	0	0	0	0	0	0	0	0	0	0	0	0	0	0	0	0	0	0	0	0	0	0	0	0	0	0	0	0	0	0	0	0	0	0
1101:15133:25521__S_026	Bacteria		Bacteroidetes	Flavobacteriia	Flavobacteriales	Flavobacteriaceae	Flavobacterium		0	0	0	0	0	0	0	0	0	0	0	0	0	0	0	0	0	0	0	0	0	0	0	0	0	0	0	0	0	0	0	0	0	0	0	0	0	0	0	0	0
1101:4523:7244__S_007	Bacteria		Bacteroidetes	Flavobacteriia	Flavobacteriales	Flavobacteriaceae	Flavobacterium		0	0	0	0	0	0	0	0	0	0	0	0	0	0	0	0	0	0	0	0	0	0	0	0	0	0	0	0	0	0	0	0	0	0	0	0	0	0	0	0	0
1101:7401:15405__S_121	Bacteria		Bacteroidetes	Flavobacteriia	Flavobacteriales	Flavobacteriaceae	Flavobacterium		0	0	0	0	0	0	0	0	0	0	0	0	0	0	0	0	0	0	0	0	0	0	0	0	0	0	0	0	0	0	0	0	0	0	0	0	0	0	0	0	0
1101:11019:3336__S_026	Bacteria		Bacteroidetes	Flavobacteriia	Flavobacteriales	Flavobacteriaceae	Flavobacterium		0	0	0	0	4	0	0	0	0	194	0	0	0	0	0	0	0	0	0	0	0	0	0	0	0	0	0	0	0	0	0	0	0	0	0	0	0	0	0	0	0
1102:10660:13341__S_075	Bacteria		Bacteroidetes	Flavobacteriia	Flavobacteriales	Flavobacteriaceae	Flavobacterium		0	0	0	0	0	0	0	0	0	0	0	0	0	0	0	0	0	0	0	0	0	0	0	0	0	0	0	0	0	0	0	0	0	0	0	0	0	0	0	0	0
1104:11611:14335__S_128	Bacteria		Bacteroidetes	Flavobacteriia	Flavobacteriales	Flavobacteriaceae	Flavobacterium		0	0	0	0	0	0	0	0	0	0	0	0	0	0	0	0	0	0	0	0	0	0	0	0	0	0	0	0	0	0	0	0	0	0	0	0	0	0	0	0	0
2101:16622:14353__S_026	Bacteria		Bacteroidetes	Flavobacteriia	Flavobacteriales	Flavobacteriaceae	Flavobacterium		0	0	0	0	0	0	11	0	0	0	0	0	0	0	0	0	0	0	0	0	0	0	0	0	0	0	0	0	0	0	0	0	0	0	0	0	0	0	0	0	0
2103:10761:19848__R_091	Bacteria		Bacteroidetes	Flavobacteriia	Flavobacteriales	Flavobacteriaceae	Flavobacterium		0	0	0	0	0	0	0	0	0	0	0	0	0	0	0	0	0	0	0	0	0	0	0	0	0	0	0	0	0	0	0	0	0	0	0	0	0	0	0	0	0
2103:23163:16378__R_128	Bacteria		Bacteroidetes	Flavobacteriia	Flavobacteriales	Flavobacteriaceae	Flavobacterium		0	0	0	0	0	0	0	9	0	0	0	0	0	0	0	0	0	0	0	0	0	0	0	0	0	0	0	0	0	0	0	0	0	0	0	0	0	0	0	0	0
2104:22288:24011__R_041	Bacteria		Bacteroidetes	Flavobacteriia	Flavobacteriales	Flavobacteriaceae	Flavobacterium		0	0	0	0	0	0	0	0	0	0	0	0	0	0	0	0	0	0	0	0	0	0	0	0	0	0	0	0	0	0	0	0	0	0	0	0	0	0	0	0	20
1101:22417:23819__R_014	Bacteria		Bacteroidetes	Flavobacteriia	Flavobacteriales	Flavobacteriaceae			0	0	0	0	0	0	0	0	0	0	0	0	0	12	0	0	0	0	0	0	0	0	0	0	0	0	0	0	0	0	0	0	7	0	0	0	0	0	0	0	0
1101:19437:16784__R_115	Bacteria		Bacteroidetes	Flavobacteriia	Flavobacteriales	Flavobacteriaceae			0	0	0	0	0	0	0	0	0	3	0	0	0	0	0	0	0	0	0	0	0	0	0	1	0	2	0	0	0	0	0	0	0	0	0	0	0	0	0	0	0
1101:11996:9607__R_075	Bacteria		Bacteroidetes	Sphingobacteriia	Sphingobacteriales	Sphingobacteriaceae	Mucilaginibacter	uncultured Mucilaginibacter sp.	0	0	0	0	0	0	1	0	0	2	3	0	0	0	0	0	0	0	0	0	0	0	0	0	0	25	1	0	0	0	0	0	5	3	0	0	0	0	0	0	0
1101:10157:17145__R_015	Bacteria		Bacteroidetes	Sphingobacteriia	Sphingobacteriales	Sphingobacteriaceae	Mucilaginibacter		10	17	63	0	15	6	0	25	38	17	11	1	0	74	117	3	0	0	0	0	1	13	0	5	4	0	0	0	1	0	0	76	16	0	0	5	0	0	0	4	26
1101:13450:20678__R_066	Bacteria		Bacteroidetes	Sphingobacteriia	Sphingobacteriales	Sphingobacteriaceae	Mucilaginibacter		0	0	52	6	11	0	6	2	0	10	8	4	0	14	6	4	0	1	0	0	0	0	4	0	0	0	0	0	1	8	0	1	7	10	3	0	0	0	0	0	5
1101:8662:18175__S_026	Bacteria		Bacteroidetes	Sphingobacteriia	Sphingobacteriales	Sphingobacteriaceae	Mucilaginibacter		0	0	0	0	1	0	0	0	0	0	0	0	0	1	0	0	0	0	0	0	0	0	0	0	0	0	0	0	0	0	0	0	0	0	0	0	0	0	0	0	0
1102:19095:5863__S_077	Bacteria		Bacteroidetes	Sphingobacteriia	Sphingobacteriales	Sphingobacteriaceae	Mucilaginibacter		47	0	11	15	9	3	2	43	20	1	3	4	3	115	19	1	0	40	0	0	5	7	0	0	36	0	17	3	0	10	0	43	8	24	0	0	0	8	0	0	2
1103:29140:14904__S_077	Bacteria		Bacteroidetes	Sphingobacteriia	Sphingobacteriales	Sphingobacteriaceae	Mucilaginibacter		0	0	0	0	0	0	0	0	0	0	0	0	0	0	0	0	0	0	0	0	0	0	0	0	0	0	0	0	0	0	0	0	0	0	0	0	0	0	0	0	0
1104:23448:17494__R_097	Bacteria		Bacteroidetes	Sphingobacteriia	Sphingobacteriales	Sphingobacteriaceae	Mucilaginibacter		20	19	3	47	3	34	89	1	8	29	47	4	19	66	57	74	3	32	14	0	9	7	30	10	1	1	21	0	3	13	0	3	30	11	0	34	0	4	0	0	1
2102:8432:9995__R_018	Bacteria		Bacteroidetes	Sphingobacteriia	Sphingobacteriales	Sphingobacteriaceae	Mucilaginibacter		0	0	0	0	0	0	0	0	0	0	0	0	0	0	6	0	0	13	0	0	0	0	0	0	0	0	0	0	0	0	0	0	0	0	0	1	0	0	0	0	0
1103:26119:19571__S_071	Bacteria		Bacteroidetes	Sphingobacteriia	Sphingobacteriales	Sphingobacteriaceae	Pedobacter	uncultured Pedobacter sp.	0	0	0	0	0	0	0	0	0	0	0	0	0	0	0	0	0	0	0	0	0	0	0	0	0	0	0	0	0	0	0	0	0	0	0	0	0	0	0	0	0
1101:11769:12079__R_040	Bacteria		Bacteroidetes	Sphingobacteriia	Sphingobacteriales	Sphingobacteriaceae	Pedobacter		0	0	0	2	0	0	0	0	1	7	0	0	0	10	0	0	0	0	0	0	0	0	0	0	0	0	0	0	0	0	0	0	0	0	0	0	0	0	0	11	0
1101:19271:16270__S_052	Bacteria		Bacteroidetes	Sphingobacteriia	Sphingobacteriales	Sphingobacteriaceae	Solitalea	uncultured Solitalea sp.	0	0	0	0	0	0	0	0	0	0	0	0	0	0	0	0	0	0	0	0	0	0	0	0	0	0	0	0	0	0	0	0	0	0	0	0	0	0	0	0	0
1103:8271:19066__S_053	Bacteria		Bacteroidetes	Sphingobacteriia	Sphingobacteriales	Sphingobacteriaceae	Solitalea	uncultured Solitalea sp.	0	0	0	0	0	0	0	0	0	0	0	0	0	0	0	0	0	0	0	0	0	0	0	0	0	0	0	0	0	0	0	0	0	0	0	0	0	0	0	0	0
1101:7825:24672__S_072	Bacteria		Bacteroidetes	Sphingobacteriia	Sphingobacteriales	Sphingobacteriaceae	Sphingobacterium	uncultured Sphingobacterium sp.	0	0	0	0	0	0	0	0	0	0	0	0	0	2	0	0	0	0	0	0	0	0	0	0	0	0	0	0	0	0	0	0	0	0	0	0	0	0	0	0	0
1101:13834:12398__S_026	Bacteria		Bacteroidetes	Sphingobacteriia	Sphingobacteriales	Sphingobacteriaceae	Sphingobacterium		0	0	0	0	0	0	0	0	0	0	0	0	0	0	0	0	0	0	0	0	0	0	0	0	0	0	0	0	0	0	0	0	0	0	0	0	0	0	0	0	0
1101:13849:9611__S_026	Bacteria		Bacteroidetes	Sphingobacteriia	Sphingobacteriales	Sphingobacteriaceae	Sphingobacterium		0	0	0	0	0	0	0	0	0	0	0	0	0	0	0	0	0	0	0	0	0	0	0	0	0	0	0	0	0	0	0	0	0	0	0	0	0	0	0	0	0
1101:22656:6726__R_040	Bacteria		Bacteroidetes	Sphingobacteriia	Sphingobacteriales	Sphingobacteriaceae	Sphingobacterium		0	0	0	0	0	0	0	1	0	0	0	0	0	23	0	0	0	0	0	0	0	0	0	0	0	2	0	0	1	0	0	0	0	0	0	0	0	0	0	63	15
1101:11935:15186__S_028	Bacteria		Bacteroidetes	Sphingobacteriia	Sphingobacteriales	Sphingobacteriaceae			0	0	0	0	0	0	0	0	0	0	0	0	0	0	0	0	0	0	0	0	0	0	0	0	0	0	0	0	0	0	0	20	0	0	0	0	0	0	0	0	0
1101:12821:3327__S_077	Bacteria		Bacteroidetes	Sphingobacteriia	Sphingobacteriales	Sphingobacteriaceae			0	0	0	0	9	0	0	0	0	0	0	0	0	1	0	0	0	0	0	0	0	0	0	0	0	2	0	0	0	0	0	0	0	0	0	0	0	0	0	3	0
1101:14741:26183__R_002	Bacteria		Bacteroidetes	Sphingobacteriia	Sphingobacteriales	Sphingobacteriaceae			0	176	0	13	3	8	34	0	1	0	7	0	2	1	24	0	0	28	6	0	6	5	0	1	0	0	4	0	0	0	0	11	19	6	0	1	0	63	0	0	26
1101:18059:12923__R_127	Bacteria		Bacteroidetes	Sphingobacteriia	Sphingobacteriales	Sphingobacteriaceae			0	0	1	0	9	0	0	0	6	5	0	0	0	0	1	7	15	0	0	0	1	0	0	0	0	9	4	0	2	0	0	13	11	0	1	11	0	7	10	0	0
1101:19248:22711__R_091	Bacteria		Bacteroidetes	Sphingobacteriia	Sphingobacteriales	Sphingobacteriaceae			0	0	0	0	0	0	0	0	0	0	0	0	0	0	3	0	0	0	0	0	0	0	0	0	0	0	0	0	0	0	0	0	0	0	0	0	0	0	0	0	0
1101:24553:13470__R_111	Bacteria		Bacteroidetes	Sphingobacteriia	Sphingobacteriales	Sphingobacteriaceae			0	0	0	0	0	0	0	2	0	0	0	0	0	1	0	0	0	0	0	0	0	0	0	0	1	0	0	0	0	0	0	0	0	0	0	0	0	1	0	0	0
1102:10926:13697__R_127	Bacteria		Bacteroidetes	Sphingobacteriia	Sphingobacteriales	Sphingobacteriaceae			0	0	5	0	4	0	0	4	7	2	2	0	0	34	55	0	0	14	0	0	0	0	0	0	0	0	0	0	0	0	0	3	0	0	0	10	0	19	0	0	6
1102:27640:15463__S_080	Bacteria		Bacteroidetes	Sphingobacteriia	Sphingobacteriales	Sphingobacteriaceae			0	0	0	0	0	0	0	0	0	0	0	0	0	2	0	0	0	0	0	0	0	0	0	0	0	0	0	0	0	0	0	0	0	0	0	0	0	0	0	0	0
1101:15379:20250__S_051	Bacteria		Bacteroidetes	Sphingobacteriia	Sphingobacteriales	Sphingobacteriaceae			1	0	27	0	1	15	0	18	0	7	4	1	5	3	29	30	0	2	0	0	0	0	27	4	0	0	3	0	2	0	0	4	39	4	0	0	4	0	14	3	3
1101:4155:8533__S_033	Bacteria		Bacteroidetes	Sphingobacteriia	Sphingobacteriales	Sphingobacteriaceae			0	0	0	0	0	0	0	0	0	0	0	0	0	0	0	0	0	0	0	0	0	0	0	0	0	0	0	0	0	0	0	0	0	0	0	0	0	0	0	0	0
1102:12043:28347__S_088	Bacteria		Bacteroidetes	Sphingobacteriia	Sphingobacteriales	Sphingobacteriaceae			0	0	0	0	0	0	0	0	0	0	0	0	0	0	0	0	0	0	0	0	0	0	0	0	0	0	0	0	1	0	0	0	0	0	0	0	0	0	0	0	0
1102:5770:8793__R_111	Bacteria		Bacteroidetes	Sphingobacteriia	Sphingobacteriales	Sphingobacteriaceae			0	0	0	1	0	1	0	0	0	0	0	0	0	1	0	0	0	0	0	0	0	0	0	0	0	0	9	0	0	0	0	0	0	0	0	0	0	0	0	0	0
1104:14628:23931__R_075	Bacteria		Bacteroidetes	Sphingobacteriia	Sphingobacteriales	Sphingobacteriaceae			0	0	1	0	18	0	0	0	0	0	0	0	0	24	1	0	0	0	0	0	0	0	0	0	0	0	0	0	0	0	0	3	0	0	0	0	0	0	0	0	0
1104:20880:3336__S_058	Bacteria		Bacteroidetes	Sphingobacteriia	Sphingobacteriales	Sphingobacteriaceae			0	0	0	0	0	0	0	0	0	0	0	0	0	0	0	0	0	0	0	0	0	0	0	0	0	0	0	0	0	0	0	0	0	0	0	0	0	0	0	0	0
2101:20861:7944__S_077	Bacteria		Bacteroidetes	Sphingobacteriia	Sphingobacteriales	Sphingobacteriaceae			0	0	0	0	0	0	0	0	0	0	0	0	0	0	0	0	0	0	0	0	0	0	0	0	0	0	0	0	0	0	0	0	0	0	0	0	0	0	0	0	0
1101:10136:10948__S_081	Bacteria		Bacteroidetes						0	0	0	0	0	0	0	0	0	0	0	0	0	0	0	0	0	0	0	0	0	0	0	0	0	0	0	0	0	0	0	0	0	0	0	0	0	0	0	0	0
1101:11429:13894__S_029	Bacteria		Bacteroidetes						0	0	0	0	0	0	0	0	0	0	0	0	0	0	0	0	0	0	0	0	0	0	0	0	0	0	0	0	0	0	0	0	0	0	0	0	0	0	0	0	0
1101:11830:20775__R_064	Bacteria		Bacteroidetes						0	7	4	0	2	0	1	9	0	0	0	0	0	0	0	0	0	1	0	0	0	0	0	0	0	1	0	0	2	0	0	2	0	0	0	0	0	1	0	0	0
1101:11850:8994__S_031	Bacteria		Bacteroidetes						0	0	0	0	2	0	0	10	0	0	0	0	0	0	0	0	0	0	0	0	0	0	0	0	0	1	0	0	0	0	0	0	0	0	0	0	0	0	0	3	0
1101:11952:8460__R_097	Bacteria		Bacteroidetes						0	0	1	0	0	0	0	0	0	0	0	0	0	0	0	0	0	0	0	0	0	0	0	0	0	0	0	0	0	0	0	0	0	0	0	0	0	0	0	10	0
1101:12086:21847__R_122	Bacteria		Bacteroidetes						3	34	0	6	1	26	14	2	0	1	2	1	13	35	49	38	31	7	4	2	11	7	41	7	59	14	1	1	1	2	0	0	27	15	13	4	1	17	28	1	5
1101:12139:14267__S_058	Bacteria		Bacteroidetes						0	0	0	0	0	0	0	0	0	0	0	0	0	0	0	1	0	0	0	0	0	0	0	0	0	0	0	0	0	0	0	0	0	0	0	0	0	0	0	0	0
1101:12803:18371__S_046	Bacteria		Bacteroidetes						0	0	0	0	0	0	0	0	0	0	0	0	0	0	0	0	0	0	0	0	0	0	0	0	0	0	0	0	0	0	0	0	0	0	0	0	0	0	0	0	0
1101:13429:8091__R_023	Bacteria		Bacteroidetes						0	1	0	3	1	2	1	0	1	2	1	0	1	16	2	8	5	3	7	0	0	17	61	1	0	0	14	0	0	9	0	0	1	5	0	1	0	4	0	0	0
1101:13759:14417__R_008	Bacteria		Bacteroidetes						0	2	172	4	399	28	1	822	2	241	49	78	107	26	6	1	0	0	1	98	0	0	0	0	0	115	1	0	0	275	237	0	16	297	0	84	10	20	0	238	0
1101:14217:5666__R_046	Bacteria		Bacteroidetes						0	0	0	0	0	0	1	1	0	0	0	0	1	0	0	0	2	0	0	0	0	0	0	0	3	1	0	0	0	0	0	1	0	0	0	0	0	0	1	1	0
1101:14383:17095__R_099	Bacteria		Bacteroidetes						0	0	0	0	0	0	0	14	0	0	0	0	0	0	0	0	0	0	0	0	0	0	0	0	0	0	0	0	0	0	0	0	0	0	0	0	0	0	0	0	0
1101:14818:16768__R_065	Bacteria		Bacteroidetes						0	0	0	0	4	0	0	0	0	0	0	0	0	0	0	0	0	0	0	0	0	0	0	0	0	0	0	0	0	0	0	0	0	0	0	0	0	0	0	0	0
1101:15153:11102__R_038	Bacteria		Bacteroidetes						0	0	0	0	0	0	0	0	0	0	0	0	2	0	0	1	0	0	0	0	0	0	0	0	0	0	0	0	0	1	0	0	0	0	0	1	0	1	0	0	0
1101:15512:9818__R_075	Bacteria		Bacteroidetes						0	0	0	0	0	0	0	0	0	0	0	0	0	0	0	0	0	0	0	0	0	0	0	0	0	0	0	0	0	0	0	0	0	0	0	0	0	0	0	1	0
1101:15990:4888__S_057	Bacteria		Bacteroidetes						0	0	0	0	0	0	0	0	0	0	0	0	0	0	0	0	0	0	0	0	0	0	0	0	0	0	0	0	0	0	0	0	0	0	0	0	0	0	0	0	0
1101:16013:5779__S_072	Bacteria		Bacteroidetes						0	0	0	0	0	0	0	0	0	0	0	0	0	0	0	0	0	0	0	0	0	0	0	0	0	0	0	0	0	0	0	0	0	0	0	0	0	0	0	0	0
1101:16250:15144__S_076	Bacteria		Bacteroidetes						0	0	0	0	0	0	0	0	0	0	0	0	0	0	0	0	0	0	0	0	0	0	0	0	0	0	0	0	0	0	0	0	0	0	0	0	0	0	0	0	0
1101:16951:9618__R_013	Bacteria		Bacteroidetes						0	0	0	0	0	1	0	2	0	1	0	0	2	0	0	0	0	0	0	1	0	0	0	0	0	1	0	0	0	2	0	0	1	1	0	0	0	0	0	1	0
1101:17371:5860__S_039	Bacteria		Bacteroidetes						0	2	3	0	3	0	0	0	0	0	2	0	1	0	0	5	0	0	0	0	0	0	0	0	1	0	0	0	0	0	0	0	0	0	0	0	0	0	1	1	1
1101:17594:20561__R_081	Bacteria		Bacteroidetes						0	0	0	0	0	0	0	0	0	0	0	0	0	0	0	0	2	0	0	0	0	0	0	0	2	0	0	0	0	0	0	1	0	0	0	0	0	1	0	0	0
1101:17760:2579__S_038	Bacteria		Bacteroidetes						0	0	0	0	0	0	0	0	0	0	0	0	0	0	0	0	0	0	0	0	0	0	0	0	0	0	0	0	0	0	0	0	0	0	0	0	0	0	0	0	0
1101:18168:26202__S_052	Bacteria		Bacteroidetes						0	0	0	0	0	0	0	0	0	0	0	0	0	0	0	0	0	0	0	0	0	0	0	0	0	0	0	0	0	0	0	0	0	0	0	0	0	0	0	0	0
1101:18992:6055__R_003	Bacteria		Bacteroidetes						0	0	1	0	0	0	0	0	0	0	0	0	2	0	0	2	0	0	0	0	0	0	0	0	0	0	0	0	0	0	0	0	0	1	0	0	0	0	0	0	0
1101:19079:26246__R_042	Bacteria		Bacteroidetes						0	0	0	0	0	0	1	0	0	0	1	0	0	0	0	0	0	1	0	0	0	0	0	0	0	2	1	0	0	1	0	1	1	0	0	0	0	0	0	0	0
1101:20713:24564__R_016	Bacteria		Bacteroidetes						0	0	0	0	0	0	0	0	0	0	0	0	0	0	0	39	0	0	0	0	0	0	0	0	0	0	0	0	0	0	0	0	0	0	0	0	0	0	0	0	0
1101:21186:28089__R_096	Bacteria		Bacteroidetes						0	0	0	0	1	0	0	0	0	0	0	0	0	0	0	0	0	0	0	0	0	0	0	0	0	0	0	0	0	0	0	1	0	0	0	0	0	0	0	0	0
1101:21927:5305__S_070	Bacteria		Bacteroidetes						0	0	0	0	0	0	0	0	0	0	0	0	0	0	0	0	0	0	0	0	0	0	0	0	0	0	0	0	0	0	0	0	0	0	0	0	0	0	0	0	0
1101:22479:18969__R_104	Bacteria		Bacteroidetes						1	0	2	0	0	0	1	0	2	0	0	0	2	0	0	0	0	0	0	0	0	0	1	0	0	0	0	0	0	0	0	0	0	0	0	1	0	0	0	0	0
1101:22600:21956__R_104	Bacteria		Bacteroidetes						0	0	0	1	0	0	0	0	0	0	0	0	0	0	0	0	10	0	0	0	0	0	0	0	0	0	0	17	0	0	0	0	0	0	0	0	0	0	0	0	2
1101:22693:19503__S_128	Bacteria		Bacteroidetes						0	0	0	0	0	0	0	0	0	0	0	0	0	0	17	0	2	0	0	0	0	0	0	0	0	1	0	0	0	6	0	0	0	0	0	4	0	0	0	0	0
1101:24201:17760__R_017	Bacteria		Bacteroidetes						1	0	0	0	1	0	0	0	0	0	0	0	0	0	0	0	2	0	0	0	0	0	0	0	0	0	0	0	0	0	0	0	0	0	0	0	0	1	0	0	0
1101:25161:7203__S_101	Bacteria		Bacteroidetes						0	0	0	0	0	0	0	0	0	0	0	0	0	0	0	0	0	0	0	0	0	0	0	0	0	0	0	0	0	0	0	0	0	0	0	0	0	0	0	0	0
1101:26161:14639__S_089	Bacteria		Bacteroidetes						0	0	0	0	0	0	0	0	0	0	0	0	0	0	0	0	0	0	0	0	0	0	0	0	0	3	0	0	0	0	0	0	1	0	0	0	0	0	0	0	0
1101:26715:15432__R_115	Bacteria		Bacteroidetes						0	0	0	2	0	0	0	0	0	0	0	0	0	16	0	0	0	0	0	0	0	0	0	0	0	0	0	0	0	0	0	0	9	0	0	0	0	0	0	0	0
1101:26738:17122__R_040	Bacteria		Bacteroidetes						0	0	0	1	0	0	0	0	0	0	0	0	0	3	0	0	0	0	0	0	0	0	0	0	0	2	0	0	0	0	0	0	0	0	1	0	0	0	0	19	0
1101:26974:19104__R_096	Bacteria		Bacteroidetes						214	499	340	129	466	402	414	558	289	113	320	185	379	193	197	1093	767	141	96	3	12	98	81	44	403	108	35	147	22	61	0	536	2	81	66	197	38	291	303	133	148
1101:26996:7169__S_027	Bacteria		Bacteroidetes						0	0	0	0	4	0	0	0	1	0	0	0	0	2	0	9	0	0	0	0	0	0	0	0	0	1	0	0	0	0	0	0	0	0	0	14	0	0	2	0	0
1101:4318:12294__S_068	Bacteria		Bacteroidetes						0	0	0	0	0	0	0	0	0	0	0	0	0	0	0	0	0	0	0	0	0	0	0	0	0	0	0	0	0	0	0	0	0	0	0	0	0	0	0	0	0
1101:6395:20703__R_039	Bacteria		Bacteroidetes						0	0	0	0	0	1	0	0	0	3	5	0	15	1	0	0	0	0	0	0	0	0	1	0	0	0	0	0	0	3	0	0	0	0	11	0	0	0	62	0	0
1101:7098:17803__R_064	Bacteria		Bacteroidetes						0	1	1	0	2	1	1	2	1	0	1	2	5	0	0	0	9	0	0	0	0	0	2	0	1	1	1	1	0	0	0	3	0	0	0	0	0	4	2	1	4
1101:8868:10141__R_075	Bacteria		Bacteroidetes						0	0	0	0	0	0	0	0	0	0	0	0	0	0	0	0	0	0	0	0	0	0	0	0	0	0	0	0	0	0	0	0	0	0	0	0	0	0	0	0	0
1101:9577:20102__R_066	Bacteria		Bacteroidetes						0	0	3	0	0	0	0	6	0	0	0	0	0	2	0	5	0	0	0	0	0	0	0	0	0	0	0	0	0	14	0	0	0	0	0	0	4	0	0	27	0
1101:9771:19301__S_057	Bacteria		Bacteroidetes						0	0	0	0	0	0	0	0	0	0	0	0	0	0	0	0	0	0	0	0	0	0	0	0	0	0	0	0	0	0	0	0	0	0	0	0	0	0	0	0	0
1102:11963:4762__S_024	Bacteria		Bacteroidetes						0	0	0	0	0	0	0	0	0	0	0	0	0	0	0	0	0	0	0	0	0	0	0	0	0	0	0	0	0	0	0	0	0	0	0	0	0	0	0	0	0
1102:13243:8905__S_098	Bacteria		Bacteroidetes						0	0	0	0	0	0	0	0	0	0	0	0	0	0	0	0	0	0	0	0	0	0	0	0	0	0	0	0	0	0	0	0	0	0	0	0	0	0	0	0	0
1102:14049:14536__R_080	Bacteria		Bacteroidetes						0	0	0	0	0	0	0	0	0	0	0	0	0	0	0	0	0	0	0	0	0	0	0	0	0	0	0	0	0	0	0	0	0	0	0	0	0	0	0	0	0
1102:14593:10965__R_014	Bacteria		Bacteroidetes						0	0	0	0	1	0	0	0	0	0	0	0	0	14	0	0	0	0	0	0	1	0	0	0	0	0	0	0	0	0	0	0	0	0	0	0	0	0	0	0	0
1102:15615:9979__S_063	Bacteria		Bacteroidetes						0	0	0	0	0	0	0	0	0	0	0	0	0	0	0	0	0	0	0	0	0	0	0	0	0	0	0	0	0	0	0	0	0	0	0	0	0	0	0	0	0
1102:18307:15169__S_075	Bacteria		Bacteroidetes						0	0	0	0	0	0	0	0	0	0	0	0	0	0	0	0	0	0	0	0	0	0	0	0	0	0	0	0	0	0	0	0	0	0	0	0	0	0	0	0	0
1102:19392:13040__R_091	Bacteria		Bacteroidetes						0	0	0	0	0	0	0	0	0	0	0	0	0	0	0	0	0	0	0	0	0	0	0	0	0	0	0	0	0	0	0	0	0	0	0	0	0	0	0	0	0
1102:19718:11825__S_122	Bacteria		Bacteroidetes						0	0	0	0	0	0	0	0	0	0	0	0	0	0	0	0	0	0	0	0	0	0	0	0	0	0	0	0	0	0	0	0	0	0	0	0	0	0	0	0	0
1102:19770:9928__S_079	Bacteria		Bacteroidetes						0	0	0	0	0	0	0	0	0	0	0	0	0	0	0	0	0	0	0	0	0	0	0	0	0	0	0	0	0	0	0	0	0	0	0	0	0	0	0	0	0
1102:21656:9318__S_077	Bacteria		Bacteroidetes						0	0	0	0	0	0	0	0	0	0	0	0	0	0	0	0	0	0	0	0	0	0	0	0	0	0	0	0	0	0	0	0	0	0	0	0	0	0	0	0	0
1102:22288:11103__R_033	Bacteria		Bacteroidetes						0	0	0	0	0	0	0	0	0	0	0	0	0	0	0	0	0	0	0	0	0	0	0	0	0	0	0	0	0	0	0	0	13	0	0	0	0	0	0	0	0
1102:24860:6288__S_073	Bacteria		Bacteroidetes						0	0	0	0	0	0	0	0	0	0	0	0	0	0	0	0	0	0	0	0	0	0	0	0	0	0	0	0	0	0	0	0	0	0	0	0	0	0	0	0	0
1102:26866:14299__R_116	Bacteria		Bacteroidetes						1	0	1	1	1	0	0	1	0	0	0	0	0	0	0	1	1	0	0	0	0	0	0	0	2	0	0	0	0	1	0	0	0	0	0	0	0	1	1	0	1
1102:27444:9246__S_090	Bacteria		Bacteroidetes						0	0	0	0	0	0	2	0	0	0	0	0	0	0	0	0	0	0	0	0	0	0	0	0	0	3	0	0	0	0	0	0	0	0	0	0	0	0	0	0	0
1102:9124:21873__S_063	Bacteria		Bacteroidetes						0	0	0	0	0	0	0	0	0	0	0	0	0	0	0	0	0	0	0	0	0	0	0	0	0	0	0	0	0	0	0	0	0	0	0	0	0	0	0	0	0
1102:9320:25241__S_083	Bacteria		Bacteroidetes						0	0	0	0	0	0	0	0	0	0	0	0	0	0	0	0	0	0	0	0	0	0	0	0	0	0	0	0	0	0	0	0	0	0	0	0	0	0	0	0	0
1101:12525:21818__S_086	Bacteria		Bacteroidetes						0	0	0	0	0	0	0	0	0	0	0	0	0	0	0	0	0	0	0	0	0	0	0	0	0	0	0	0	0	0	0	0	0	0	0	0	0	0	0	0	0
1101:13564:17029__S_085	Bacteria		Bacteroidetes						0	0	0	0	0	0	0	0	0	0	0	0	0	0	0	0	0	0	0	0	0	0	0	0	0	0	0	0	0	12	0	0	0	0	0	0	0	0	0	0	0
1101:14004:16635__R_123	Bacteria		Bacteroidetes						0	0	0	0	0	0	0	0	0	0	0	0	0	0	0	0	0	0	0	0	0	0	0	0	0	0	0	0	0	0	0	0	0	0	0	0	0	0	0	0	0
1101:14464:16421__S_027	Bacteria		Bacteroidetes						0	0	0	0	0	0	0	0	0	0	0	0	0	0	0	0	0	0	0	0	0	0	0	0	0	0	0	0	0	0	0	0	0	0	0	0	0	0	0	0	0
1101:14832:18438__R_014	Bacteria		Bacteroidetes						0	0	0	0	0	0	0	2	0	0	0	0	0	15	4	0	0	0	0	0	0	0	0	0	0	0	0	0	0	0	0	0	0	0	0	1	0	0	0	1	0
1101:15185:7318__R_055	Bacteria		Bacteroidetes						0	0	0	1	0	0	0	0	0	0	0	0	0	0	0	0	0	0	0	0	0	0	0	0	0	0	1	0	0	1	0	0	0	0	0	0	0	0	0	0	0
1101:15240:3099__S_030	Bacteria		Bacteroidetes						0	0	0	0	0	0	0	0	0	0	0	0	0	0	0	0	0	0	0	0	0	0	0	0	0	0	0	0	0	0	0	0	0	0	0	0	0	0	0	0	0
1101:16318:19448__R_119	Bacteria		Bacteroidetes						0	0	0	0	0	0	0	0	0	0	0	0	0	0	0	0	0	0	0	0	0	0	0	0	0	0	0	0	0	0	0	0	0	0	0	0	0	0	0	1	0
1101:16814:28938__R_008	Bacteria		Bacteroidetes						0	0	0	0	2	0	0	5	0	0	0	2	0	0	0	0	0	0	0	0	0	0	0	0	0	0	0	0	0	0	0	0	0	0	0	0	0	0	0	0	0
1101:17274:26587__S_051	Bacteria		Bacteroidetes						0	0	0	0	0	0	0	0	0	0	0	0	0	0	0	0	0	0	0	0	0	0	0	0	0	0	0	0	0	0	0	0	0	0	0	0	0	0	0	0	0
1101:18456:28558__S_028	Bacteria		Bacteroidetes						0	0	0	0	0	0	0	0	0	0	5	0	0	0	0	0	0	0	0	0	0	0	0	0	0	0	0	0	0	0	0	0	0	0	0	0	0	0	0	0	0
1101:19098:17756__S_006	Bacteria		Bacteroidetes						0	0	0	0	0	0	0	0	0	0	0	0	0	0	0	0	0	0	0	0	0	0	0	0	0	0	0	0	0	0	0	0	0	0	0	0	0	0	0	0	0
1101:22880:7823__S_096	Bacteria		Bacteroidetes						0	0	0	0	1	0	0	0	0	0	0	0	0	0	0	0	0	0	0	0	0	0	0	0	0	0	0	0	0	0	0	0	0	0	0	0	0	0	0	0	0
1101:25394:21305__R_066	Bacteria		Bacteroidetes						0	0	0	0	1	0	0	0	0	0	0	0	0	2	5	0	0	3	0	1	0	0	0	0	5	0	0	0	1	0	0	0	0	0	0	0	0	0	0	0	6
1101:27757:12415__S_020	Bacteria		Bacteroidetes						0	0	0	0	0	0	0	0	0	0	0	0	0	0	0	0	0	0	0	0	0	0	0	0	0	0	0	0	0	0	0	0	0	0	0	0	0	0	0	0	0
1101:7663:11339__R_005	Bacteria		Bacteroidetes						0	0	0	0	8	0	0	0	0	0	0	0	0	0	0	0	0	0	0	0	0	0	0	0	0	0	0	0	0	0	0	0	0	0	0	0	0	0	0	0	0
1102:10149:10615__R_005	Bacteria		Bacteroidetes						0	0	0	0	1	0	0	0	0	0	0	0	0	0	0	0	0	0	0	0	0	0	0	0	0	0	0	0	0	0	0	0	0	0	0	0	0	0	0	0	0
1102:10800:19329__S_046	Bacteria		Bacteroidetes						0	0	0	0	0	0	0	0	0	0	0	0	0	0	0	0	0	0	0	0	0	0	0	0	0	0	0	0	0	0	0	0	0	0	0	0	0	0	0	0	0
1102:12453:11191__S_043	Bacteria		Bacteroidetes						0	0	0	0	0	0	0	0	0	0	0	0	0	0	0	0	0	0	0	0	0	0	0	0	0	0	0	0	0	0	0	0	0	0	0	0	0	0	0	0	0
1102:12600:27588__R_091	Bacteria		Bacteroidetes						0	0	0	0	1	0	0	0	0	0	0	0	0	0	2	0	0	0	0	0	0	0	0	0	0	0	0	0	0	0	0	0	0	0	0	0	0	0	0	0	0
1102:13762:19587__S_017	Bacteria		Bacteroidetes						0	0	0	0	0	0	0	0	0	0	0	0	0	0	0	0	0	0	0	0	0	0	0	0	0	0	0	0	0	0	0	0	0	0	0	0	0	0	0	0	1
1102:14665:4997__S_062	Bacteria		Bacteroidetes						0	0	0	0	0	0	0	0	0	0	0	0	0	0	0	0	0	0	10	0	0	0	0	0	0	0	0	0	0	0	0	0	0	0	0	0	0	0	0	0	3
1102:15452:18287__R_075	Bacteria		Bacteroidetes						0	0	0	0	3	0	0	1	0	0	0	0	0	0	0	0	0	0	0	0	0	0	0	0	0	0	0	0	0	0	0	0	3	0	0	0	0	0	0	0	0
1102:16006:18886__S_077	Bacteria		Bacteroidetes						0	0	0	0	3	0	0	0	0	0	0	0	0	0	0	0	0	0	0	0	0	0	0	0	0	0	0	0	0	0	0	0	0	0	0	0	2	0	0	0	0
1102:16451:16086__S_043	Bacteria		Bacteroidetes						0	0	0	0	0	0	0	0	0	0	0	0	0	0	0	0	0	0	0	0	0	0	0	0	0	0	0	0	0	0	0	0	0	0	0	0	0	0	0	0	0
1102:17552:5855__R_005	Bacteria		Bacteroidetes						0	0	0	0	4	0	0	4	0	0	0	0	1	1	0	1	0	0	0	0	0	0	0	0	0	0	0	0	0	1	0	0	0	0	0	0	0	0	0	0	0
1102:27368:14409__R_072	Bacteria		Bacteroidetes						0	0	0	0	0	0	0	0	0	0	0	0	0	0	0	0	0	0	0	0	0	0	0	0	0	0	0	0	0	0	0	0	0	0	0	0	0	0	0	0	0
1102:8487:24956__R_075	Bacteria		Bacteroidetes						62	148	53	26	14	16	24	93	1	2	30	14	35	5	43	46	7	9	27	13	6	55	10	25	32	16	3	60	3	55	0	32	0	0	12	9	4	57	42	119	26
1103:12584:6010__S_046	Bacteria		Bacteroidetes						0	0	0	0	4	0	0	0	0	0	0	0	0	0	0	0	0	0	0	0	0	0	0	0	0	0	0	0	0	0	0	0	0	0	0	0	0	0	0	0	0
1103:13499:24750__S_094	Bacteria		Bacteroidetes						37	113	93	8	116	7	32	14	0	43	169	4	17	16	39	232	0	0	43	13	7	0	0	0	195	0	67	49	9	326	0	57	199	0	32	115	7	2	197	60	33
1103:17706:23314__R_103	Bacteria		Bacteroidetes						0	0	0	0	0	0	0	0	1	0	0	0	2	11	0	12	0	0	0	0	2	0	0	0	0	4	0	0	0	0	0	0	0	3	0	0	0	0	0	5	0
1103:24257:21101__S_089	Bacteria		Bacteroidetes						0	0	0	0	0	0	0	0	0	0	0	0	0	0	0	0	0	0	0	0	0	0	1	0	0	1	1	0	0	0	0	0	4	1	0	1	0	1	0	0	0
1103:26728:16048__R_048	Bacteria		Bacteroidetes						6	0	0	0	0	0	0	0	0	0	0	0	0	1	0	0	2	0	0	0	3	0	1	0	0	0	0	0	0	0	0	0	1	0	0	0	0	0	0	0	0
1104:10202:26366__S_073	Bacteria		Bacteroidetes						0	0	0	1	0	0	0	0	0	0	0	0	0	0	0	0	0	0	0	0	0	0	0	0	0	0	0	0	0	0	0	0	0	0	0	0	0	0	0	0	0
1104:11953:17739__S_071	Bacteria		Bacteroidetes						0	0	0	0	0	0	0	0	0	0	0	0	2	0	0	0	0	0	0	0	0	0	0	0	0	0	0	0	0	0	0	0	0	0	0	0	0	0	0	0	0
1104:18022:7576__S_061	Bacteria		Bacteroidetes						0	0	0	0	0	0	0	0	0	0	0	0	0	0	0	0	0	0	0	0	0	0	0	0	0	0	0	0	0	0	0	0	0	0	0	0	0	0	0	0	0
1104:18684:11445__R_046	Bacteria		Bacteroidetes						0	0	0	0	0	0	0	0	0	0	1	0	0	0	0	0	0	0	0	0	0	0	0	0	0	0	0	0	0	0	0	1	0	0	0	0	0	0	0	0	0
1104:19903:18008__R_100	Bacteria		Bacteroidetes						2	0	1	1	0	0	0	1	0	0	0	0	0	0	0	0	0	1	0	0	0	0	0	0	0	1	0	1	0	0	0	0	0	1	0	0	0	2	0	0	0
1104:22591:25678__S_046	Bacteria		Bacteroidetes						0	0	0	0	0	0	0	0	0	0	0	0	0	0	0	0	0	0	0	0	0	0	0	0	0	0	0	0	0	0	0	0	0	0	0	0	0	0	0	0	0
1104:23047:22531__S_085	Bacteria		Bacteroidetes						0	0	0	0	0	0	0	0	0	0	0	0	0	0	0	0	0	0	0	0	0	0	0	0	0	0	0	0	0	0	0	0	0	0	0	0	0	0	0	0	0
1104:24196:11888__R_129	Bacteria		Bacteroidetes						2	4	1	2	1	0	2	5	0	0	2	1	1	0	0	0	1	0	2	0	0	1	0	0	14	3	0	0	0	2	0	2	0	0	1	0	0	2	1	3	0
1104:6765:7533__S_077	Bacteria		Bacteroidetes						0	0	0	0	0	0	0	0	0	0	0	0	0	0	0	0	0	0	0	0	0	0	0	0	0	0	0	0	0	0	0	0	0	0	0	0	0	0	0	0	0
2101:13897:1844__S_111	Bacteria		Bacteroidetes						0	0	6	0	0	0	0	0	0	0	0	0	0	0	0	0	0	0	0	0	0	0	0	0	0	0	0	0	0	0	0	0	0	0	0	0	0	0	0	0	0
2101:17462:7436__R_028	Bacteria		Bacteroidetes						0	1	0	0	0	0	0	0	0	0	1	0	0	0	1	1	0	0	0	0	0	0	0	0	0	0	1	2	0	0	0	1	0	0	0	0	0	0	0	0	0
2101:19210:5692__R_099	Bacteria		Bacteroidetes						0	0	0	0	0	0	0	0	0	0	0	0	0	0	0	0	0	0	0	0	0	0	0	0	0	0	0	0	0	0	0	0	0	0	0	0	0	0	0	0	0
2101:7747:12818__R_025	Bacteria		Bacteroidetes						0	0	0	0	0	0	0	0	0	0	0	0	0	0	0	0	0	0	0	0	0	0	0	0	12	0	0	0	0	0	0	0	0	0	0	0	0	0	0	0	0
2101:7825:10131__R_038	Bacteria		Bacteroidetes						0	0	0	0	0	0	1	0	0	0	0	0	0	0	0	0	0	0	0	1	0	0	0	0	0	0	0	0	0	0	0	0	0	0	0	0	0	2	0	0	0
2101:9932:18451__S_082	Bacteria		Bacteroidetes						0	6	9	0	0	1	0	1	12	0	0	2	60	0	0	195	6	0	48	0	0	0	0	0	0	1	0	0	1	0	0	0	0	15	0	0	0	0	1	3	0
2102:10295:8473__S_117	Bacteria		Bacteroidetes						0	0	0	0	0	0	0	0	0	0	0	0	0	0	0	0	0	0	0	0	0	0	0	0	0	0	0	0	0	0	0	0	0	0	0	0	0	0	0	0	0
2102:13165:5821__R_117	Bacteria		Bacteroidetes						0	0	0	0	0	0	0	0	0	1	0	0	0	0	0	0	0	0	0	0	0	0	0	0	0	0	0	0	0	0	0	0	0	0	0	1	0	0	0	0	6
2102:21825:23376__R_080	Bacteria		Bacteroidetes						0	1	0	0	2	0	1	0	1	0	3	0	3	0	1	0	10	3	2	0	0	1	1	0	8	0	3	3	0	2	0	7	3	2	1	1	0	4	4	2	4
2102:22944:19344__R_042	Bacteria		Bacteroidetes						0	0	0	0	0	0	0	0	0	0	0	0	0	0	0	0	0	0	0	0	0	0	0	0	0	0	0	0	0	0	0	0	0	0	0	0	0	0	0	0	0
2102:24564:8126__R_011	Bacteria		Bacteroidetes						2	6	8	0	5	0	2	2	0	1	12	0	0	2	3	6	0	0	3	0	0	0	0	0	12	0	1	1	0	7	0	0	7	0	1	6	0	0	4	3	2
2103:11583:14490__S_088	Bacteria		Bacteroidetes						0	0	0	0	0	0	0	0	0	0	0	0	0	0	0	0	0	0	0	0	0	0	0	0	0	0	0	0	0	0	0	0	0	0	0	0	0	0	0	0	0
2103:18427:6977__R_014	Bacteria		Bacteroidetes						0	0	0	0	0	0	0	0	0	0	0	0	0	61	0	0	0	0	0	0	0	0	0	0	0	0	0	0	0	0	0	0	0	0	0	0	0	0	0	0	0
2103:9459:21377__R_052	Bacteria		Bacteroidetes						0	0	0	0	0	0	0	0	0	0	1	0	0	0	0	0	0	0	1	0	1	0	0	0	5	0	1	1	0	0	0	1	0	0	0	0	0	0	0	0	2
2104:15741:1790__R_005	Bacteria		Bacteroidetes						0	0	1	0	3	1	0	0	0	0	0	0	0	0	1	0	0	0	0	0	0	0	0	0	0	0	0	2	0	0	0	0	0	0	0	0	0	1	0	0	0
2104:17493:5125__S_060	Bacteria		Bacteroidetes						0	0	0	0	0	0	0	0	0	0	0	0	0	0	0	0	0	0	0	0	0	0	0	0	0	0	0	0	0	0	0	0	0	0	0	0	0	0	0	0	0
2104:19141:14782__S_025	Bacteria		Bacteroidetes						0	0	0	0	0	0	0	0	0	0	0	0	0	0	0	0	0	0	0	0	0	0	0	0	0	0	0	0	0	0	0	0	0	0	0	0	0	0	0	0	0
2104:24806:15882__S_022	Bacteria		Bacteroidetes						0	0	0	0	0	0	0	0	0	0	0	0	0	16	0	0	0	0	0	0	0	0	0	0	0	0	0	0	0	0	0	0	0	0	0	0	0	0	0	0	0
2104:29393:15607__R_112	Bacteria		Bacteroidetes						0	0	5	0	0	0	0	0	0	0	0	0	0	0	1	0	0	0	0	0	0	0	0	0	0	0	0	0	0	0	0	0	0	0	0	0	0	0	0	0	0
2102:10133:3307__R_130	Bacteria		Chlamydiae	Chlamydiia	Chlamydiales	Parachlamydiaceae			0	0	0	0	0	0	0	0	0	0	0	0	0	0	0	0	0	0	0	0	0	0	0	0	0	0	0	0	0	0	0	0	0	0	0	0	0	0	0	0	0
1102:24908:14814__R_082	Bacteria		Chlamydiae	Chlamydiia	Chlamydiales	Simkaniaceae	Simkania	uncultured Simkania sp.	0	0	0	0	0	0	0	0	0	0	0	0	0	0	0	0	0	0	0	0	0	0	0	0	0	0	0	0	0	0	0	0	0	0	0	0	0	0	0	0	0
1104:18145:21675__S_061	Bacteria		Chlamydiae	Chlamydiia	Chlamydiales	Simkaniaceae	Simkania	uncultured Simkania sp.	0	0	0	0	0	0	2	0	0	0	0	0	0	0	0	0	0	0	0	0	0	0	0	0	0	0	0	0	0	0	0	0	0	0	0	0	0	0	0	0	0
2103:27819:21722__S_062	Bacteria		Chlamydiae	Chlamydiia	Chlamydiales	Simkaniaceae	Simkania	uncultured Simkania sp.	0	0	0	0	0	0	0	0	0	0	0	0	0	0	0	0	0	0	0	0	0	0	0	0	0	0	0	0	0	0	0	0	0	0	0	0	0	0	0	0	0
2104:9482:10691__S_048	Bacteria		Chlamydiae	Chlamydiia	Chlamydiales	Simkaniaceae	Simkania	uncultured Simkania sp.	0	0	0	0	0	0	0	0	0	0	0	0	0	0	0	0	0	0	0	0	0	0	0	0	0	0	0	0	0	0	0	0	0	0	0	0	0	0	0	0	0
1101:19652:6512__R_001	Bacteria		Chlamydiae	Chlamydiia	Chlamydiales				25	0	0	0	0	0	0	0	0	0	3	0	0	10	12	7	0	0	0	0	0	0	0	0	0	0	0	0	0	0	0	1	5	0	0	0	0	0	2	0	0
1101:29132:17463__S_062	Bacteria		Chlamydiae	Chlamydiia	Chlamydiales				0	0	0	0	0	0	0	0	0	0	0	0	0	0	0	0	0	0	0	0	0	0	0	0	0	0	0	0	0	0	0	0	0	0	0	0	0	0	0	0	0
1103:9974:20763__S_094	Bacteria		Chlamydiae	Chlamydiia	Chlamydiales				0	0	0	0	0	0	0	0	0	0	0	0	0	0	0	0	0	0	0	0	0	0	0	0	0	0	0	0	0	0	0	0	0	0	0	0	0	0	0	0	0
1101:27573:8238__R_095	Bacteria		Chloroflexi	Anaerolineae	Anaerolineales	Anaerolineaceae	Levilinea	uncultured Levilinea sp.	0	0	0	0	0	0	0	0	0	0	0	0	0	0	0	0	0	0	0	0	0	0	0	0	0	0	0	0	0	0	0	0	0	0	0	0	0	0	0	5	0
1101:23964:9920__S_082	Bacteria		Chloroflexi	Anaerolineae	Anaerolineales	Anaerolineaceae	Levilinea	uncultured Levilinea sp.	0	0	0	0	0	0	0	0	0	0	0	0	0	0	0	0	0	0	0	0	0	0	0	0	0	0	0	0	0	0	0	0	0	0	0	0	0	0	0	0	0
1103:11239:15728__S_027	Bacteria		Chloroflexi	Anaerolineae	Anaerolineales	Anaerolineaceae	Levilinea	uncultured Levilinea sp.	0	0	0	0	0	0	0	0	0	0	0	0	0	0	0	0	0	0	0	0	0	0	0	0	0	0	0	0	0	0	0	0	0	0	0	0	0	0	0	0	0
1101:20240:24223__S_103	Bacteria		Chloroflexi	Anaerolineae	Anaerolineales	Anaerolineaceae			0	0	0	0	0	0	0	0	0	0	0	0	0	0	0	0	0	0	0	0	0	0	0	0	0	0	0	0	0	0	0	0	0	0	0	0	0	0	0	0	0
1102:15729:7999__S_088	Bacteria		Chloroflexi	Anaerolineae	Anaerolineales	Anaerolineaceae			0	0	0	0	0	0	0	0	0	0	0	0	0	0	0	0	0	0	0	0	0	0	0	0	0	0	0	0	0	0	0	0	0	0	0	0	0	0	0	0	0
1104:23163:12888__S_121	Bacteria		Chloroflexi	Dehalococcoidia			Dehalogenimonas	uncultured Dehalogenimonas sp.	0	0	0	0	0	0	0	0	0	0	0	0	0	0	0	0	0	0	0	0	0	0	0	0	0	0	0	0	0	0	0	0	0	0	0	0	0	0	0	0	0
1101:10642:14120__S_126	Bacteria		Chloroflexi	Ktedonobacteria	Ktedonobacterales	Ktedonobacteraceae	Ktedonobacter	uncultured Ktedonobacter sp.	0	0	0	0	0	0	0	0	0	0	0	0	0	0	0	0	0	0	0	0	0	0	0	0	0	0	0	0	0	0	0	0	0	0	0	0	0	0	0	0	0
1101:11370:22243__S_086	Bacteria		Chloroflexi	Ktedonobacteria	Ktedonobacterales	Ktedonobacteraceae	Ktedonobacter	uncultured Ktedonobacter sp.	0	0	0	0	0	0	0	0	0	0	0	0	0	0	0	0	0	0	0	0	0	0	0	0	0	0	0	0	0	3	0	0	0	0	0	0	0	0	0	0	0
1101:11457:23077__R_039	Bacteria		Chloroflexi	Ktedonobacteria	Ktedonobacterales	Ktedonobacteraceae	Ktedonobacter	uncultured Ktedonobacter sp.	20	34	17	21	13	52	75	4	58	18	37	11	73	1	16	105	228	4	188	14	26	59	56	284	247	95	85	250	12	160	0	0	98	31	59	227	20	90	285	126	48
1101:12363:14344__S_088	Bacteria		Chloroflexi	Ktedonobacteria	Ktedonobacterales	Ktedonobacteraceae	Ktedonobacter	uncultured Ktedonobacter sp.	0	0	0	0	0	0	0	0	0	0	0	0	0	0	0	0	0	0	0	0	0	0	0	0	0	0	0	0	0	0	0	0	0	0	0	0	0	0	0	0	0
1101:12744:15978__R_041	Bacteria		Chloroflexi	Ktedonobacteria	Ktedonobacterales	Ktedonobacteraceae	Ktedonobacter	uncultured Ktedonobacter sp.	1	0	0	0	0	0	0	0	0	0	0	0	1	0	1	0	0	0	0	0	0	0	0	0	0	1	0	0	0	0	0	0	1	0	0	0	0	0	1	0	1
1101:13830:15748__S_029	Bacteria		Chloroflexi	Ktedonobacteria	Ktedonobacterales	Ktedonobacteraceae	Ktedonobacter	uncultured Ktedonobacter sp.	0	0	0	0	0	0	0	0	0	0	0	0	0	0	0	0	0	0	0	0	0	0	0	0	0	0	0	0	0	0	0	0	0	0	0	0	0	0	0	0	0
1101:14688:24660__R_108	Bacteria		Chloroflexi	Ktedonobacteria	Ktedonobacterales	Ktedonobacteraceae	Ktedonobacter	uncultured Ktedonobacter sp.	0	0	0	0	0	0	0	0	0	0	0	0	0	0	0	0	0	0	0	0	0	0	0	0	0	0	1	0	0	0	0	0	0	0	0	0	0	0	0	0	0
1101:15188:9046__R_101	Bacteria		Chloroflexi	Ktedonobacteria	Ktedonobacterales	Ktedonobacteraceae	Ktedonobacter	uncultured Ktedonobacter sp.	0	0	0	0	0	0	0	0	0	0	0	2	0	0	0	0	0	0	0	0	0	0	0	0	0	0	0	0	0	0	0	0	0	0	0	0	0	0	0	0	0
1101:16795:12443__R_114	Bacteria		Chloroflexi	Ktedonobacteria	Ktedonobacterales	Ktedonobacteraceae	Ktedonobacter	uncultured Ktedonobacter sp.	0	0	0	1	1	0	1	1	0	0	0	0	0	0	0	0	0	0	0	0	0	0	0	0	1	0	1	0	0	0	0	0	1	0	0	0	0	2	0	2	0
1101:17214:16158__R_117	Bacteria		Chloroflexi	Ktedonobacteria	Ktedonobacterales	Ktedonobacteraceae	Ktedonobacter	uncultured Ktedonobacter sp.	0	0	0	0	0	0	0	0	0	0	0	0	0	0	0	0	0	0	0	0	0	0	0	1	2	0	0	0	0	1	0	0	1	0	1	0	0	1	0	0	0
1101:19542:20538__S_028	Bacteria		Chloroflexi	Ktedonobacteria	Ktedonobacterales	Ktedonobacteraceae	Ktedonobacter	uncultured Ktedonobacter sp.	0	0	0	0	0	0	0	0	0	0	0	0	0	0	0	0	0	0	0	0	0	0	0	0	0	9	0	0	0	0	0	0	0	0	0	0	0	0	0	0	0
1101:23271:4822__R_121	Bacteria		Chloroflexi	Ktedonobacteria	Ktedonobacterales	Ktedonobacteraceae	Ktedonobacter	uncultured Ktedonobacter sp.	0	0	0	1	0	0	0	0	0	0	0	0	0	0	0	0	0	0	0	0	0	0	0	0	0	0	0	0	0	0	0	0	0	1	0	0	0	1	0	0	0
1101:23847:17590__R_108	Bacteria		Chloroflexi	Ktedonobacteria	Ktedonobacterales	Ktedonobacteraceae	Ktedonobacter	uncultured Ktedonobacter sp.	0	0	0	0	2	0	0	0	0	0	0	0	0	0	0	0	0	0	0	0	0	0	0	1	0	0	0	0	0	0	0	1	0	0	0	0	0	0	0	0	0
1101:24414:22184__S_117	Bacteria		Chloroflexi	Ktedonobacteria	Ktedonobacterales	Ktedonobacteraceae	Ktedonobacter	uncultured Ktedonobacter sp.	0	0	0	0	0	0	0	0	0	0	0	0	0	0	0	0	0	0	0	0	0	0	0	0	0	0	0	0	0	0	0	0	0	0	0	0	0	0	0	0	0
1101:25174:8587__S_014	Bacteria		Chloroflexi	Ktedonobacteria	Ktedonobacterales	Ktedonobacteraceae	Ktedonobacter	uncultured Ktedonobacter sp.	0	0	0	0	0	0	0	0	0	0	0	0	0	0	0	0	0	0	0	0	0	0	0	0	0	0	0	0	0	0	0	0	0	0	0	0	0	0	0	0	0
1101:29041:11486__R_080	Bacteria		Chloroflexi	Ktedonobacteria	Ktedonobacterales	Ktedonobacteraceae	Ktedonobacter	uncultured Ktedonobacter sp.	0	0	2	0	0	0	0	0	0	0	0	1	0	0	0	0	4	0	0	0	0	0	0	0	0	0	0	0	0	0	0	0	0	0	0	0	0	0	0	0	0
1101:3759:16060__R_040	Bacteria		Chloroflexi	Ktedonobacteria	Ktedonobacterales	Ktedonobacteraceae	Ktedonobacter	uncultured Ktedonobacter sp.	11	36	39	51	57	61	52	38	11	29	56	24	33	1	4	12	99	27	166	13	30	62	67	63	87	55	111	33	2	77	0	18	89	25	12	36	5	190	169	100	91
1101:6945:14679__R_013	Bacteria		Chloroflexi	Ktedonobacteria	Ktedonobacterales	Ktedonobacteraceae	Ktedonobacter	uncultured Ktedonobacter sp.	0	0	1	0	0	0	1	0	0	0	0	0	1	0	0	0	0	0	0	1	0	0	0	1	1	0	0	0	0	0	0	0	1	0	0	0	0	0	0	0	0
1101:9073:11516__R_003	Bacteria		Chloroflexi	Ktedonobacteria	Ktedonobacterales	Ktedonobacteraceae	Ktedonobacter	uncultured Ktedonobacter sp.	0	0	4	0	1	0	0	0	0	0	0	0	1	0	0	0	0	0	0	0	0	0	0	0	0	0	0	0	0	61	0	0	0	0	0	0	0	0	0	0	0
1102:10618:10808__S_123	Bacteria		Chloroflexi	Ktedonobacteria	Ktedonobacterales	Ktedonobacteraceae	Ktedonobacter	uncultured Ktedonobacter sp.	0	0	0	0	0	0	0	0	0	0	0	0	0	0	0	0	0	0	0	0	0	0	0	0	0	0	0	0	0	0	0	0	0	0	0	0	0	0	0	0	0
1102:11507:14422__R_079	Bacteria		Chloroflexi	Ktedonobacteria	Ktedonobacterales	Ktedonobacteraceae	Ktedonobacter	uncultured Ktedonobacter sp.	0	1	1	0	3	0	2	0	0	1	0	0	0	0	0	1	0	1	0	0	0	0	1	0	1	0	1	0	0	0	0	0	0	0	0	0	0	0	0	0	0
1102:12913:2821__S_006	Bacteria		Chloroflexi	Ktedonobacteria	Ktedonobacterales	Ktedonobacteraceae	Ktedonobacter	uncultured Ktedonobacter sp.	0	0	0	0	0	0	0	0	0	0	0	0	0	0	0	0	0	0	0	0	0	0	0	0	0	0	0	0	0	0	0	0	0	0	0	0	0	0	0	0	0
1102:13903:13472__R_080	Bacteria		Chloroflexi	Ktedonobacteria	Ktedonobacterales	Ktedonobacteraceae	Ktedonobacter	uncultured Ktedonobacter sp.	5	23	54	24	54	41	51	12	3	10	29	6	27	1	5	22	92	16	3	5	1	13	7	92	56	14	28	5	4	6	0	2	16	21	9	4	2	82	5	1	50
1102:15601:18991__R_072	Bacteria		Chloroflexi	Ktedonobacteria	Ktedonobacterales	Ktedonobacteraceae	Ktedonobacter	uncultured Ktedonobacter sp.	0	1	0	0	0	1	0	1	0	0	0	0	0	0	1	0	0	0	0	0	0	0	0	1	0	0	0	0	0	0	0	0	0	0	0	0	0	0	0	1	0
1102:16338:9618__R_114	Bacteria		Chloroflexi	Ktedonobacteria	Ktedonobacterales	Ktedonobacteraceae	Ktedonobacter	uncultured Ktedonobacter sp.	0	0	0	0	0	0	0	0	0	0	0	0	1	0	0	0	0	0	0	0	0	0	0	0	0	1	0	0	0	0	0	0	0	0	0	0	0	0	0	0	0
1102:16520:25891__R_117	Bacteria		Chloroflexi	Ktedonobacteria	Ktedonobacterales	Ktedonobacteraceae	Ktedonobacter	uncultured Ktedonobacter sp.	3	6	42	0	9	13	4	3	0	12	15	7	102	1	1	0	12	0	46	0	8	72	35	15	3	10	12	1	1	61	0	49	0	23	19	49	0	56	108	3	23
1102:17107:9152__R_080	Bacteria		Chloroflexi	Ktedonobacteria	Ktedonobacterales	Ktedonobacteraceae	Ktedonobacter	uncultured Ktedonobacter sp.	0	0	0	0	0	0	0	0	0	0	0	0	0	0	0	0	0	0	0	0	0	0	0	0	0	0	0	0	0	0	0	0	0	0	0	0	0	0	0	0	0
1102:18529:3989__S_052	Bacteria		Chloroflexi	Ktedonobacteria	Ktedonobacterales	Ktedonobacteraceae	Ktedonobacter	uncultured Ktedonobacter sp.	0	0	0	0	0	0	0	0	0	0	0	0	0	0	0	0	0	0	0	0	0	0	0	0	0	0	0	0	0	0	0	0	0	0	0	0	0	0	0	0	0
1102:19476:10921__R_097	Bacteria		Chloroflexi	Ktedonobacteria	Ktedonobacterales	Ktedonobacteraceae	Ktedonobacter	uncultured Ktedonobacter sp.	0	0	0	0	0	0	0	0	0	0	0	1	0	0	0	0	0	0	0	0	0	0	0	0	0	1	0	0	0	0	0	0	0	0	0	0	0	0	0	0	3
1102:22810:22698__R_082	Bacteria		Chloroflexi	Ktedonobacteria	Ktedonobacterales	Ktedonobacteraceae	Ktedonobacter	uncultured Ktedonobacter sp.	0	0	0	0	0	0	0	0	0	0	0	0	0	0	0	0	0	0	0	0	0	0	0	0	0	0	0	0	0	0	0	0	0	0	0	0	0	0	0	0	0
1102:22868:7143__R_100	Bacteria		Chloroflexi	Ktedonobacteria	Ktedonobacterales	Ktedonobacteraceae	Ktedonobacter	uncultured Ktedonobacter sp.	0	0	0	0	0	0	0	0	0	0	0	0	0	0	0	0	0	0	0	0	0	0	0	0	0	0	0	0	0	0	0	0	0	0	0	0	0	0	0	0	0
1102:24022:10794__R_090	Bacteria		Chloroflexi	Ktedonobacteria	Ktedonobacterales	Ktedonobacteraceae	Ktedonobacter	uncultured Ktedonobacter sp.	0	0	0	0	0	0	0	0	0	0	0	0	0	1	0	0	0	0	0	0	0	1	0	0	0	0	1	1	0	0	0	0	0	0	0	0	0	0	0	1	0
1102:26174:13540__R_103	Bacteria		Chloroflexi	Ktedonobacteria	Ktedonobacterales	Ktedonobacteraceae	Ktedonobacter	uncultured Ktedonobacter sp.	0	0	0	0	0	0	0	0	0	0	0	0	0	0	0	0	0	0	0	0	0	0	0	0	0	0	0	0	0	0	0	0	0	0	0	0	0	0	0	0	0
1102:4447:11033__S_005	Bacteria		Chloroflexi	Ktedonobacteria	Ktedonobacterales	Ktedonobacteraceae	Ktedonobacter	uncultured Ktedonobacter sp.	0	0	0	0	0	0	0	0	0	0	0	0	0	0	0	0	0	0	0	0	0	0	0	0	0	0	0	0	0	0	0	0	0	0	0	0	0	0	0	0	0
1102:8800:14801__R_024	Bacteria		Chloroflexi	Ktedonobacteria	Ktedonobacterales	Ktedonobacteraceae	Ktedonobacter	uncultured Ktedonobacter sp.	0	0	0	0	0	2	3	0	0	0	0	0	1	0	0	0	1	0	0	0	0	0	0	1	0	0	0	0	0	0	0	1	0	0	0	0	0	0	0	0	0
1101:14118:11043__S_013	Bacteria		Chloroflexi	Ktedonobacteria	Ktedonobacterales	Ktedonobacteraceae	Ktedonobacter	uncultured Ktedonobacter sp.	0	0	0	0	0	0	0	0	0	0	0	0	0	0	0	0	0	0	0	0	0	0	0	0	0	0	0	0	0	0	0	0	0	0	0	0	0	0	0	0	0
1101:15312:22507__S_089	Bacteria		Chloroflexi	Ktedonobacteria	Ktedonobacterales	Ktedonobacteraceae	Ktedonobacter	uncultured Ktedonobacter sp.	0	0	0	0	0	0	0	0	0	0	0	0	0	0	0	0	0	0	0	0	0	0	0	0	0	0	0	0	0	0	0	0	0	0	0	0	0	0	0	0	0
1101:15909:15098__S_094	Bacteria		Chloroflexi	Ktedonobacteria	Ktedonobacterales	Ktedonobacteraceae	Ktedonobacter	uncultured Ktedonobacter sp.	0	0	0	0	0	0	0	0	0	0	0	0	0	0	0	0	0	0	0	0	0	0	0	0	0	0	0	0	0	0	0	0	0	0	0	0	0	0	0	0	0
1101:16019:11867__R_008	Bacteria		Chloroflexi	Ktedonobacteria	Ktedonobacterales	Ktedonobacteraceae	Ktedonobacter	uncultured Ktedonobacter sp.	0	0	0	0	0	0	0	1	0	0	0	0	0	0	0	0	0	0	0	0	0	0	0	0	0	0	0	0	0	2	0	0	0	0	0	0	0	0	0	0	0
1101:16345:25240__R_104	Bacteria		Chloroflexi	Ktedonobacteria	Ktedonobacterales	Ktedonobacteraceae	Ktedonobacter	uncultured Ktedonobacter sp.	0	0	0	0	1	1	0	0	0	0	0	0	0	0	0	0	3	0	0	1	1	0	0	0	5	5	0	2	0	1	0	0	0	1	0	0	0	0	2	0	0
1101:17348:10184__R_064	Bacteria		Chloroflexi	Ktedonobacteria	Ktedonobacterales	Ktedonobacteraceae	Ktedonobacter	uncultured Ktedonobacter sp.	65	186	91	76	101	141	136	102	32	26	96	35	86	9	85	59	136	71	15	58	18	69	139	59	175	66	125	79	12	114	0	69	104	50	65	57	6	178	223	134	172
1101:17626:16160__R_104	Bacteria		Chloroflexi	Ktedonobacteria	Ktedonobacterales	Ktedonobacteraceae	Ktedonobacter	uncultured Ktedonobacter sp.	0	1	0	0	0	0	1	0	0	0	0	0	0	0	0	0	1	0	0	0	0	0	0	0	0	0	0	0	0	0	0	0	1	0	0	0	0	0	0	0	1
1101:19055:15865__R_028	Bacteria		Chloroflexi	Ktedonobacteria	Ktedonobacterales	Ktedonobacteraceae	Ktedonobacter	uncultured Ktedonobacter sp.	0	0	0	0	0	0	0	0	0	0	0	0	1	0	0	2	7	0	0	0	0	0	0	2	4	2	1	8	0	2	0	0	4	0	1	1	0	1	3	0	0
1101:19682:23208__R_005	Bacteria		Chloroflexi	Ktedonobacteria	Ktedonobacterales	Ktedonobacteraceae	Ktedonobacter	uncultured Ktedonobacter sp.	0	0	0	0	1	0	0	0	0	0	0	0	0	0	0	0	0	0	0	0	0	0	0	0	0	0	0	0	0	0	0	0	0	0	0	0	0	0	0	0	0
1101:20503:17058__S_096	Bacteria		Chloroflexi	Ktedonobacteria	Ktedonobacterales	Ktedonobacteraceae	Ktedonobacter	uncultured Ktedonobacter sp.	0	0	0	0	0	0	0	0	0	0	0	0	0	0	0	0	0	0	0	0	0	0	0	0	0	0	0	0	0	0	0	0	0	0	0	0	0	0	0	0	0
1101:26133:12873__S_093	Bacteria		Chloroflexi	Ktedonobacteria	Ktedonobacterales	Ktedonobacteraceae	Ktedonobacter	uncultured Ktedonobacter sp.	0	0	0	0	0	0	0	0	0	0	0	0	0	0	0	0	0	0	0	0	0	0	0	0	0	0	0	0	0	0	0	0	0	0	0	0	0	0	0	0	0
1101:27988:13055__S_123	Bacteria		Chloroflexi	Ktedonobacteria	Ktedonobacterales	Ktedonobacteraceae	Ktedonobacter	uncultured Ktedonobacter sp.	0	0	0	0	0	0	0	0	0	0	0	0	0	0	0	0	0	0	0	0	0	0	0	0	0	0	0	0	0	0	0	0	0	0	0	0	0	0	0	0	0
1101:28914:12858__R_056	Bacteria		Chloroflexi	Ktedonobacteria	Ktedonobacterales	Ktedonobacteraceae	Ktedonobacter	uncultured Ktedonobacter sp.	0	0	0	0	0	0	0	0	0	0	0	0	1	0	0	0	0	0	0	0	0	0	0	0	0	0	0	0	0	0	0	0	0	0	0	0	0	0	1	0	0
1101:5532:20444__S_006	Bacteria		Chloroflexi	Ktedonobacteria	Ktedonobacterales	Ktedonobacteraceae	Ktedonobacter	uncultured Ktedonobacter sp.	0	0	0	0	0	0	0	0	0	0	0	0	0	0	0	0	0	0	0	0	0	0	0	0	0	0	0	0	0	0	0	0	0	0	0	0	0	0	0	0	0
1101:9150:8922__R_097	Bacteria		Chloroflexi	Ktedonobacteria	Ktedonobacterales	Ktedonobacteraceae	Ktedonobacter	uncultured Ktedonobacter sp.	0	0	0	0	0	0	0	0	0	0	0	0	1	0	0	0	0	0	0	0	0	0	1	0	0	0	0	0	0	0	0	0	0	0	0	0	0	0	1	0	0
1102:10238:15958__S_091	Bacteria		Chloroflexi	Ktedonobacteria	Ktedonobacterales	Ktedonobacteraceae	Ktedonobacter	uncultured Ktedonobacter sp.	0	0	0	0	0	0	0	0	0	0	0	0	0	0	0	0	0	0	0	0	0	0	0	0	0	0	0	0	0	0	0	0	0	0	0	0	0	0	0	0	0
1102:10425:13957__S_071	Bacteria		Chloroflexi	Ktedonobacteria	Ktedonobacterales	Ktedonobacteraceae	Ktedonobacter	uncultured Ktedonobacter sp.	0	0	0	0	0	0	0	0	0	0	0	0	0	0	0	0	0	0	0	0	0	0	0	0	0	0	0	0	0	0	0	0	0	0	0	0	0	0	0	0	0
1102:16301:18436__S_064	Bacteria		Chloroflexi	Ktedonobacteria	Ktedonobacterales	Ktedonobacteraceae	Ktedonobacter	uncultured Ktedonobacter sp.	0	0	0	0	0	0	0	0	0	0	0	0	0	0	0	0	0	0	0	0	0	0	0	0	0	0	0	0	0	0	0	0	0	0	0	0	0	0	0	0	0
1102:17418:22511__S_070	Bacteria		Chloroflexi	Ktedonobacteria	Ktedonobacterales	Ktedonobacteraceae	Ktedonobacter	uncultured Ktedonobacter sp.	0	0	0	0	0	0	0	0	0	0	0	0	0	0	0	0	0	0	0	0	0	0	0	0	0	0	0	0	0	0	0	0	0	0	0	0	0	0	0	0	0
1102:19030:23774__S_086	Bacteria		Chloroflexi	Ktedonobacteria	Ktedonobacterales	Ktedonobacteraceae	Ktedonobacter	uncultured Ktedonobacter sp.	0	0	0	0	0	0	0	0	0	0	0	0	0	0	0	0	0	0	0	0	0	0	0	0	0	0	0	0	0	0	0	0	0	0	0	0	0	0	0	0	0
1102:21960:8652__S_097	Bacteria		Chloroflexi	Ktedonobacteria	Ktedonobacterales	Ktedonobacteraceae	Ktedonobacter	uncultured Ktedonobacter sp.	0	0	0	0	0	0	0	0	0	0	0	0	0	0	0	0	0	0	0	0	0	0	0	0	0	0	0	0	0	0	0	0	0	0	0	0	0	0	0	0	0
1102:22008:20297__S_071	Bacteria		Chloroflexi	Ktedonobacteria	Ktedonobacterales	Ktedonobacteraceae	Ktedonobacter	uncultured Ktedonobacter sp.	0	0	0	0	0	0	0	0	0	0	0	0	0	0	0	0	0	0	0	0	0	0	0	0	0	0	0	0	0	0	0	0	0	0	0	0	0	0	0	0	0
1102:22696:15628__S_079	Bacteria		Chloroflexi	Ktedonobacteria	Ktedonobacterales	Ktedonobacteraceae	Ktedonobacter	uncultured Ktedonobacter sp.	0	0	0	0	0	0	0	0	0	0	0	0	0	0	0	0	0	0	0	0	0	0	0	0	0	0	0	0	0	0	0	0	0	0	0	0	0	0	0	0	0
1102:25664:13174__R_108	Bacteria		Chloroflexi	Ktedonobacteria	Ktedonobacterales	Ktedonobacteraceae	Ktedonobacter	uncultured Ktedonobacter sp.	0	0	0	0	0	1	0	0	0	0	0	0	0	0	0	0	0	0	0	0	0	0	0	0	1	0	0	0	0	0	0	0	0	0	0	0	0	0	0	0	0
1102:4548:17325__S_039	Bacteria		Chloroflexi	Ktedonobacteria	Ktedonobacterales	Ktedonobacteraceae	Ktedonobacter	uncultured Ktedonobacter sp.	0	0	0	0	0	0	0	0	0	0	0	0	0	0	0	0	0	0	0	0	0	0	0	0	0	0	0	0	0	0	0	0	0	0	0	0	0	0	0	0	0
1102:6799:14872__R_079	Bacteria		Chloroflexi	Ktedonobacteria	Ktedonobacterales	Ktedonobacteraceae	Ktedonobacter	uncultured Ktedonobacter sp.	0	0	0	0	0	0	0	0	0	0	0	0	0	0	0	0	0	0	0	0	0	0	0	0	0	0	0	0	0	0	0	0	0	0	0	0	0	0	0	0	0
1103:14080:6912__S_090	Bacteria		Chloroflexi	Ktedonobacteria	Ktedonobacterales	Ktedonobacteraceae	Ktedonobacter	uncultured Ktedonobacter sp.	0	0	0	0	0	0	0	0	0	0	0	0	0	0	0	0	0	0	0	0	0	0	0	0	0	0	0	0	0	0	0	0	0	0	0	0	0	0	0	0	0
1103:16918:22999__R_117	Bacteria		Chloroflexi	Ktedonobacteria	Ktedonobacterales	Ktedonobacteraceae	Ktedonobacter	uncultured Ktedonobacter sp.	0	0	0	0	0	0	0	0	0	0	0	0	0	0	0	0	0	0	0	0	0	0	0	0	0	0	0	0	0	1	0	0	0	0	0	0	0	0	0	0	0
1103:17556:17207__S_094	Bacteria		Chloroflexi	Ktedonobacteria	Ktedonobacterales	Ktedonobacteraceae	Ktedonobacter	uncultured Ktedonobacter sp.	0	0	0	0	0	0	0	0	0	0	0	0	0	0	0	0	0	0	0	0	0	0	0	0	0	0	0	0	0	0	0	0	0	0	0	0	0	0	0	0	0
1103:17841:9995__S_092	Bacteria		Chloroflexi	Ktedonobacteria	Ktedonobacterales	Ktedonobacteraceae	Ktedonobacter	uncultured Ktedonobacter sp.	0	0	0	0	0	0	0	0	0	0	0	0	0	0	0	0	0	0	0	0	0	0	0	0	2	0	0	0	0	0	0	0	0	0	0	0	0	0	0	0	0
1103:18800:28073__S_088	Bacteria		Chloroflexi	Ktedonobacteria	Ktedonobacterales	Ktedonobacteraceae	Ktedonobacter	uncultured Ktedonobacter sp.	0	0	0	0	0	0	0	0	0	0	0	0	0	0	0	0	0	0	0	0	0	0	0	0	0	0	0	0	0	0	0	0	0	0	0	0	0	0	0	0	0
1103:27485:14523__R_011	Bacteria		Chloroflexi	Ktedonobacteria	Ktedonobacterales	Ktedonobacteraceae	Ktedonobacter	uncultured Ktedonobacter sp.	2	0	0	0	0	0	1	1	0	2	4	0	1	0	0	0	1	3	1	1	0	0	0	0	4	1	2	1	0	1	0	3	0	1	0	0	0	2	4	0	1
1103:3785:15629__R_114	Bacteria		Chloroflexi	Ktedonobacteria	Ktedonobacterales	Ktedonobacteraceae	Ktedonobacter	uncultured Ktedonobacter sp.	50	222	212	79	156	291	257	120	58	42	205	40	137	18	53	182	269	112	220	20	46	98	164	205	342	123	299	127	6	110	0	93	94	177	92	61	22	264	204	258	123
1103:8606:18491__S_086	Bacteria		Chloroflexi	Ktedonobacteria	Ktedonobacterales	Ktedonobacteraceae	Ktedonobacter	uncultured Ktedonobacter sp.	0	0	0	0	0	0	0	0	0	0	0	0	0	0	0	0	0	0	0	0	0	0	0	0	0	0	0	0	0	0	0	0	0	0	0	0	0	0	0	0	0
1104:12640:26148__R_079	Bacteria		Chloroflexi	Ktedonobacteria	Ktedonobacterales	Ktedonobacteraceae	Ktedonobacter	uncultured Ktedonobacter sp.	0	29	4	3	13	23	9	4	0	2	38	1	6	0	0	0	15	1	10	6	4	18	29	0	10	0	0	2	0	0	0	0	1	3	7	0	9	112	0	0	2
1104:13878:7430__S_005	Bacteria		Chloroflexi	Ktedonobacteria	Ktedonobacterales	Ktedonobacteraceae	Ktedonobacter	uncultured Ktedonobacter sp.	0	0	0	0	0	0	0	0	0	0	0	0	0	0	0	0	0	0	0	0	0	0	0	0	0	0	0	0	0	0	0	0	0	0	0	0	0	0	0	0	0
1104:18901:11069__R_016	Bacteria		Chloroflexi	Ktedonobacteria	Ktedonobacterales	Ktedonobacteraceae	Ktedonobacter	uncultured Ktedonobacter sp.	0	0	0	0	1	1	0	0	0	0	0	0	0	0	0	1	0	0	1	0	0	0	0	0	0	0	0	0	0	1	0	0	0	0	0	0	0	1	2	0	0
1104:19472:20597__R_078	Bacteria		Chloroflexi	Ktedonobacteria	Ktedonobacterales	Ktedonobacteraceae	Ktedonobacter	uncultured Ktedonobacter sp.	15	0	0	1	0	0	10	0	0	0	0	3	0	0	0	0	0	0	0	0	2	0	0	0	0	0	5	0	0	0	0	2	0	0	0	0	0	0	0	0	0
2101:10422:17382__R_097	Bacteria		Chloroflexi	Ktedonobacteria	Ktedonobacterales	Ktedonobacteraceae	Ktedonobacter	uncultured Ktedonobacter sp.	0	1	0	0	1	1	3	0	0	0	3	0	5	0	1	1	0	0	2	0	0	0	1	0	0	4	2	4	0	1	0	0	0	0	0	0	0	0	1	0	1
2101:12993:13891__R_081	Bacteria		Chloroflexi	Ktedonobacteria	Ktedonobacterales	Ktedonobacteraceae	Ktedonobacter	uncultured Ktedonobacter sp.	0	0	0	0	0	3	0	0	1	1	0	0	1	0	0	0	0	0	0	0	0	0	1	0	5	0	0	0	0	0	0	0	1	0	0	0	0	1	0	0	0
2101:15443:20056__S_001	Bacteria		Chloroflexi	Ktedonobacteria	Ktedonobacterales	Ktedonobacteraceae	Ktedonobacter	uncultured Ktedonobacter sp.	0	0	4	0	0	0	1	0	3	0	0	0	0	0	0	0	17	0	0	0	0	0	0	0	0	0	4	0	0	0	0	0	10	0	0	0	2	7	0	3	3
2101:17751:27559__S_006	Bacteria		Chloroflexi	Ktedonobacteria	Ktedonobacterales	Ktedonobacteraceae	Ktedonobacter	uncultured Ktedonobacter sp.	0	0	0	0	0	0	0	0	0	0	0	0	0	0	0	0	0	0	0	0	0	0	0	0	0	0	0	0	0	0	0	0	0	0	0	0	0	0	0	0	0
2101:18389:22266__R_057	Bacteria		Chloroflexi	Ktedonobacteria	Ktedonobacterales	Ktedonobacteraceae	Ktedonobacter	uncultured Ktedonobacter sp.	0	0	4	4	0	2	1	0	6	0	3	0	0	0	0	24	20	0	0	0	0	0	0	0	0	0	6	0	0	4	0	0	0	0	0	4	0	0	0	0	2
2101:23791:16489__S_081	Bacteria		Chloroflexi	Ktedonobacteria	Ktedonobacterales	Ktedonobacteraceae	Ktedonobacter	uncultured Ktedonobacter sp.	0	0	9	0	0	0	0	0	0	0	0	0	0	0	0	0	0	0	0	0	0	0	0	0	0	0	0	0	0	0	0	0	0	0	0	0	0	0	0	0	0
2101:24604:26110__R_119	Bacteria		Chloroflexi	Ktedonobacteria	Ktedonobacterales	Ktedonobacteraceae	Ktedonobacter	uncultured Ktedonobacter sp.	2	0	3	4	30	0	7	0	0	0	1	4	6	0	0	0	0	2	1	0	1	1	23	16	17	1	0	0	0	0	0	16	3	0	0	0	0	1	0	4	9
2101:25955:11537__S_027	Bacteria		Chloroflexi	Ktedonobacteria	Ktedonobacterales	Ktedonobacteraceae	Ktedonobacter	uncultured Ktedonobacter sp.	0	0	0	0	0	0	0	0	0	0	0	0	0	0	0	0	0	0	0	0	0	0	0	0	0	0	0	0	0	0	0	0	0	0	0	0	0	0	0	0	0
2101:5303:13229__S_006	Bacteria		Chloroflexi	Ktedonobacteria	Ktedonobacterales	Ktedonobacteraceae	Ktedonobacter	uncultured Ktedonobacter sp.	0	0	0	0	0	0	0	0	0	0	0	0	0	0	0	0	0	0	0	0	0	0	0	0	0	0	0	0	0	0	0	0	0	0	0	0	0	0	0	0	0
2102:14761:27808__R_097	Bacteria		Chloroflexi	Ktedonobacteria	Ktedonobacterales	Ktedonobacteraceae	Ktedonobacter	uncultured Ktedonobacter sp.	0	0	0	0	0	0	0	0	0	0	0	0	0	0	0	0	0	0	0	0	0	0	0	0	0	1	0	0	0	0	0	0	0	0	0	0	0	1	1	0	0
2102:16942:26460__R_002	Bacteria		Chloroflexi	Ktedonobacteria	Ktedonobacterales	Ktedonobacteraceae	Ktedonobacter	uncultured Ktedonobacter sp.	0	2	0	0	0	0	0	0	0	0	0	0	0	0	0	0	0	0	0	0	0	0	0	1	0	0	2	0	0	0	0	0	0	0	0	0	0	1	0	0	0
2102:27096:19829__S_070	Bacteria		Chloroflexi	Ktedonobacteria	Ktedonobacterales	Ktedonobacteraceae	Ktedonobacter	uncultured Ktedonobacter sp.	0	0	0	0	0	0	0	0	0	0	0	0	0	0	0	0	0	0	0	0	0	0	0	0	0	0	0	0	0	0	0	0	0	0	0	0	0	0	0	0	0
2102:9600:22142__R_080	Bacteria		Chloroflexi	Ktedonobacteria	Ktedonobacterales	Ktedonobacteraceae	Ktedonobacter	uncultured Ktedonobacter sp.	423	593	142	305	380	621	665	171	125	76	609	212	687	114	156	30	932	359	1125	513	221	751	1032	1810	1373	722	1265	789	31	558	232	481	849	385	368	251	43	1369	1341	187	851
2103:11276:16581__S_102	Bacteria		Chloroflexi	Ktedonobacteria	Ktedonobacterales	Ktedonobacteraceae	Ktedonobacter	uncultured Ktedonobacter sp.	0	0	0	0	0	0	0	0	0	0	0	0	0	0	0	0	0	0	0	0	0	0	0	0	0	0	0	0	0	0	0	0	0	0	0	0	0	0	0	0	0
2103:13554:23432__R_094	Bacteria		Chloroflexi	Ktedonobacteria	Ktedonobacterales	Ktedonobacteraceae	Ktedonobacter	uncultured Ktedonobacter sp.	0	19	0	1	0	0	0	0	0	0	0	0	0	0	0	0	0	0	0	0	0	0	10	0	0	0	0	0	0	26	0	0	0	0	0	0	0	0	0	0	3
2103:18681:10476__S_046	Bacteria		Chloroflexi	Ktedonobacteria	Ktedonobacterales	Ktedonobacteraceae	Ktedonobacter	uncultured Ktedonobacter sp.	0	0	0	0	0	0	0	0	0	0	0	0	0	0	0	0	0	0	0	0	0	0	0	0	0	0	0	0	0	0	0	0	0	0	0	0	0	0	0	0	0
2103:22992:12346__R_082	Bacteria		Chloroflexi	Ktedonobacteria	Ktedonobacterales	Ktedonobacteraceae	Ktedonobacter	uncultured Ktedonobacter sp.	0	0	0	0	0	1	0	0	0	0	1	0	0	0	0	0	0	0	0	0	0	0	0	1	0	0	0	0	0	0	0	1	0	0	0	0	0	0	0	0	0
2103:24725:11277__R_080	Bacteria		Chloroflexi	Ktedonobacteria	Ktedonobacterales	Ktedonobacteraceae	Ktedonobacter	uncultured Ktedonobacter sp.	1	1	0	0	0	0	2	0	0	0	0	0	0	0	0	0	1	0	0	0	0	0	0	0	0	0	0	0	0	0	0	0	0	1	0	0	0	0	1	0	0
2104:24729:13991__S_027	Bacteria		Chloroflexi	Ktedonobacteria	Ktedonobacterales	Ktedonobacteraceae	Ktedonobacter	uncultured Ktedonobacter sp.	0	0	0	0	0	0	0	0	0	0	0	0	0	0	0	0	0	0	0	0	0	0	0	0	0	0	0	0	0	21	0	0	0	0	0	0	0	0	0	0	0
2104:9275:10082__R_114	Bacteria		Chloroflexi	Ktedonobacteria	Ktedonobacterales	Ktedonobacteraceae	Ktedonobacter	uncultured Ktedonobacter sp.	0	3	0	0	0	0	0	0	0	0	0	0	0	0	0	0	0	0	0	0	0	0	0	0	0	0	0	0	0	0	0	0	0	0	0	0	0	0	0	0	3
1101:10305:22833__R_107	Bacteria		Chloroflexi	Ktedonobacteria	Ktedonobacterales	Ktedonobacteraceae	Ktedonobacter		0	0	0	0	0	0	0	0	0	0	0	0	0	0	0	0	0	0	0	0	0	0	0	0	0	1	0	0	0	0	0	0	0	0	0	2	0	0	0	0	0
1101:13053:9813__S_098	Bacteria		Chloroflexi	Ktedonobacteria	Ktedonobacterales	Ktedonobacteraceae	Ktedonobacter		0	0	0	0	0	0	0	0	0	0	0	0	0	0	0	0	0	0	0	0	0	0	0	0	0	0	0	0	0	0	0	0	0	0	0	0	0	0	0	0	0
1101:15590:8536__R_113	Bacteria		Chloroflexi	Ktedonobacteria	Ktedonobacterales	Ktedonobacteraceae	Ktedonobacter		0	0	0	0	0	0	0	0	0	0	0	0	0	0	0	0	0	0	0	0	0	0	0	0	0	0	0	0	0	0	0	1	0	0	0	0	0	0	0	0	0
1101:15723:12266__S_036	Bacteria		Chloroflexi	Ktedonobacteria	Ktedonobacterales	Ktedonobacteraceae	Ktedonobacter		0	0	0	0	0	0	0	0	0	0	0	0	0	0	0	0	0	0	0	0	0	0	0	0	0	0	0	0	0	0	0	0	0	0	0	0	0	0	0	0	0
1101:18264:14594__R_130	Bacteria		Chloroflexi	Ktedonobacteria	Ktedonobacterales	Ktedonobacteraceae	Ktedonobacter		0	0	0	0	0	0	1	0	0	0	0	0	0	1	0	0	0	0	0	0	0	0	1	0	0	0	0	0	0	1	0	0	0	0	0	0	0	0	0	0	0
1101:20131:18684__R_043	Bacteria		Chloroflexi	Ktedonobacteria	Ktedonobacterales	Ktedonobacteraceae	Ktedonobacter		0	0	0	0	0	0	0	0	0	0	0	0	0	0	0	0	0	0	0	0	0	0	0	0	0	0	0	0	0	0	0	0	0	0	0	0	0	0	11	0	3
1101:20233:22650__R_119	Bacteria		Chloroflexi	Ktedonobacteria	Ktedonobacterales	Ktedonobacteraceae	Ktedonobacter		0	0	0	0	0	1	0	0	0	0	0	0	1	0	0	0	1	0	0	0	0	0	0	1	1	0	0	1	0	0	0	0	0	0	0	0	0	0	0	0	1
1101:23769:15147__R_080	Bacteria		Chloroflexi	Ktedonobacteria	Ktedonobacterales	Ktedonobacteraceae	Ktedonobacter		35	0	0	1	0	3	0	0	0	0	0	2	4	0	0	5	24	0	0	1	0	7	0	0	0	0	0	0	0	1	0	0	0	0	0	0	0	1	0	0	0
1101:28843:18926__R_019	Bacteria		Chloroflexi	Ktedonobacteria	Ktedonobacterales	Ktedonobacteraceae	Ktedonobacter		0	0	0	0	0	0	0	0	0	0	0	0	0	0	0	0	0	0	2	0	0	0	0	0	0	0	0	0	0	0	0	0	0	0	0	1	0	0	0	0	0
1101:4358:13826__R_119	Bacteria		Chloroflexi	Ktedonobacteria	Ktedonobacterales	Ktedonobacteraceae	Ktedonobacter		0	0	0	0	0	4	0	0	0	1	0	0	0	0	0	0	2	0	0	0	0	0	0	0	0	1	0	0	0	0	0	0	0	0	0	1	0	4	0	0	0
1102:12077:28783__R_080	Bacteria		Chloroflexi	Ktedonobacteria	Ktedonobacterales	Ktedonobacteraceae	Ktedonobacter		0	0	0	1	0	0	0	0	0	0	0	0	0	0	0	0	1	0	1	0	0	0	0	0	0	0	0	0	0	0	0	1	0	0	0	0	0	0	0	0	0
1102:25952:24564__R_106	Bacteria		Chloroflexi	Ktedonobacteria	Ktedonobacterales	Ktedonobacteraceae	Ktedonobacter		0	0	0	0	1	0	0	0	0	0	0	0	0	0	0	0	2	0	1	0	0	0	0	0	0	1	0	0	0	2	0	0	0	0	0	0	0	0	0	2	0
1102:28193:14846__R_003	Bacteria		Chloroflexi	Ktedonobacteria	Ktedonobacterales	Ktedonobacteraceae	Ktedonobacter		0	0	1	0	0	0	0	0	0	0	0	0	0	0	0	0	0	0	0	0	0	0	0	0	0	0	0	0	0	0	0	0	0	0	0	0	0	0	0	0	0
1102:28457:11394__R_071	Bacteria		Chloroflexi	Ktedonobacteria	Ktedonobacterales	Ktedonobacteraceae	Ktedonobacter		0	0	0	0	0	0	0	0	0	0	0	0	0	0	0	0	0	0	0	0	0	0	0	0	0	0	0	0	0	0	0	0	0	0	0	0	0	0	0	2	0
1101:11663:2633__R_097	Bacteria		Chloroflexi	Ktedonobacteria	Ktedonobacterales	Ktedonobacteraceae	Ktedonobacter		0	0	1	0	0	0	0	0	0	0	0	0	0	0	0	0	0	0	0	0	0	0	0	0	0	0	1	0	0	0	0	0	0	0	0	0	0	0	1	0	0
1101:13708:17919__S_006	Bacteria		Chloroflexi	Ktedonobacteria	Ktedonobacterales	Ktedonobacteraceae	Ktedonobacter		0	0	0	0	0	0	0	0	0	0	0	0	0	0	0	0	0	0	0	0	0	0	0	0	0	0	0	0	0	0	0	0	0	0	0	0	0	0	0	0	0
1101:14066:20339__S_119	Bacteria		Chloroflexi	Ktedonobacteria	Ktedonobacterales	Ktedonobacteraceae	Ktedonobacter		0	0	0	0	0	0	0	0	1	0	0	1	0	0	0	0	12	0	2	1	0	8	0	9	0	0	0	0	1	0	0	0	0	0	0	0	0	0	0	0	0
1102:10447:10895__S_072	Bacteria		Chloroflexi	Ktedonobacteria	Ktedonobacterales	Ktedonobacteraceae	Ktedonobacter		0	0	0	0	0	0	0	0	0	0	0	0	2	0	0	0	0	0	0	0	0	0	0	0	0	0	0	0	0	0	0	0	0	0	0	11	0	0	0	0	0
1103:5766:12983__R_024	Bacteria		Chloroflexi	Ktedonobacteria	Ktedonobacterales	Ktedonobacteraceae	Ktedonobacter		4	0	1	8	3	16	11	0	0	2	10	0	20	4	13	51	62	9	5	13	11	26	11	167	28	95	10	46	3	75	0	0	65	7	90	45	7	3	85	25	36
1103:8083:8458__R_043	Bacteria		Chloroflexi	Ktedonobacteria	Ktedonobacterales	Ktedonobacteraceae	Ktedonobacter		0	0	0	0	0	0	0	0	0	0	3	0	0	0	0	0	1	0	0	0	0	0	0	0	0	0	0	0	0	0	0	0	3	0	0	0	0	0	0	0	5
1104:26650:11044__R_110	Bacteria		Chloroflexi	Ktedonobacteria	Ktedonobacterales	Ktedonobacteraceae	Ktedonobacter		0	0	0	0	0	0	0	0	0	1	0	0	0	0	0	0	2	0	0	0	0	0	0	0	0	0	0	0	0	0	0	0	0	0	0	0	0	0	0	0	0
2102:19544:25547__S_123	Bacteria		Chloroflexi	Ktedonobacteria	Ktedonobacterales	Ktedonobacteraceae	Ktedonobacter		0	0	0	0	0	0	0	0	0	0	0	0	0	0	0	0	0	0	0	0	0	0	0	0	0	0	0	0	0	0	0	0	0	0	0	0	0	0	0	0	0
2104:22597:9934__S_074	Bacteria		Chloroflexi	Ktedonobacteria	Ktedonobacterales	Ktedonobacteraceae	Ktedonobacter		0	0	0	0	0	0	0	0	0	0	0	0	0	0	0	0	0	0	0	0	0	0	0	0	0	0	0	0	0	0	0	0	0	0	0	0	0	0	0	0	0
1101:12543:15768__S_064	Bacteria		Chloroflexi	Ktedonobacteria	Ktedonobacterales				0	0	0	0	0	0	0	0	0	0	0	0	0	1	0	0	0	0	0	0	0	0	0	0	0	0	0	0	0	0	0	0	0	0	0	0	0	0	0	0	0
1102:12290:26655__S_105	Bacteria		Chloroflexi	Ktedonobacteria	Ktedonobacterales				0	0	0	0	0	0	0	0	0	0	0	0	0	0	0	0	0	0	0	0	0	0	0	0	0	0	1	0	0	0	0	0	0	0	0	0	0	0	0	0	0
1101:11806:19165__R_118	Bacteria		Chloroflexi	Ktedonobacteria	Ktedonobacterales				0	0	0	0	0	0	0	0	0	0	0	0	0	0	0	0	0	0	0	0	0	0	0	0	0	0	0	0	0	0	0	0	0	0	0	0	0	0	0	0	0
1103:12553:21092__S_089	Bacteria		Chloroflexi	Ktedonobacteria	Ktedonobacterales				0	0	0	0	0	0	0	0	0	0	0	0	0	0	0	0	0	0	0	0	0	0	0	0	0	0	0	0	0	0	0	0	0	0	0	0	0	0	0	0	0
1103:19504:16732__S_095	Bacteria		Chloroflexi	Ktedonobacteria	Ktedonobacterales				0	0	0	0	0	0	0	0	0	0	0	0	0	0	0	0	0	0	0	0	0	0	0	0	0	0	0	0	0	0	0	0	0	0	0	0	0	0	0	0	0
1101:11898:17395__S_008	Bacteria		Chloroflexi	Ktedonobacteria					0	0	0	0	0	0	0	0	0	0	0	0	0	0	0	0	0	0	0	0	0	0	0	0	0	0	0	0	0	0	0	0	0	0	0	0	0	0	0	0	0
1101:22986:7460__S_120	Bacteria		Chloroflexi	Ktedonobacteria					0	0	0	0	0	0	0	0	0	0	0	0	0	0	0	0	0	0	0	0	0	0	0	0	0	0	0	0	0	0	0	0	0	0	0	0	0	0	0	0	0
1101:8294:15406__S_127	Bacteria		Chloroflexi	Ktedonobacteria					0	0	0	0	0	0	0	0	0	0	0	0	0	0	0	0	0	0	0	0	0	0	0	0	0	0	0	0	0	0	0	0	0	0	0	0	0	0	0	0	0
1101:8895:25812__S_052	Bacteria		Chloroflexi	Ktedonobacteria					0	0	0	0	0	0	0	0	0	0	0	0	0	0	0	0	0	0	0	0	0	0	0	0	0	0	0	0	0	0	0	0	0	0	0	0	0	0	0	0	0
1102:6874:17162__S_120	Bacteria		Chloroflexi	Ktedonobacteria					0	0	0	0	0	1	0	0	0	0	0	0	0	0	0	0	0	0	0	0	0	0	0	0	0	0	0	0	0	0	0	0	0	0	0	0	0	0	0	0	0
1102:9425:20058__S_034	Bacteria		Chloroflexi	Ktedonobacteria					0	0	0	0	0	0	0	0	0	0	0	0	0	0	0	0	0	0	0	0	0	0	0	0	0	0	0	0	0	0	0	0	0	0	0	0	0	0	0	0	0
1103:19809:10750__S_071	Bacteria		Chloroflexi	Ktedonobacteria					0	0	0	0	0	0	0	0	0	0	0	0	0	0	0	0	0	0	0	0	0	0	0	0	0	0	0	0	0	0	0	0	0	0	0	0	0	0	0	0	0
1104:12121:15773__S_088	Bacteria		Chloroflexi	Ktedonobacteria					0	0	0	0	0	0	0	0	0	0	0	0	0	0	0	0	0	0	0	0	0	0	0	0	0	0	0	0	0	0	0	0	0	0	0	0	0	0	0	0	0
1104:16244:10101__S_071	Bacteria		Chloroflexi	Ktedonobacteria					0	0	0	0	0	0	0	0	0	0	0	0	0	0	0	0	0	0	0	0	0	0	0	0	0	0	0	0	0	0	0	0	0	0	0	0	0	0	0	0	0
1101:15409:9842__S_096	Bacteria		Chloroflexi	Thermomicrobia	Sphaerobacterales	Sphaerobacteraceae	Sphaerobacter	uncultured Sphaerobacter sp.	0	0	0	0	1	0	6	0	0	0	2	0	0	0	0	0	0	0	0	1	0	0	0	0	0	0	0	0	0	4	0	0	0	0	1	2	0	0	0	0	0
1101:15750:13975__S_109	Bacteria		Chloroflexi	Thermomicrobia	Sphaerobacterales	Sphaerobacteraceae	Sphaerobacter	uncultured Sphaerobacter sp.	0	0	1	0	0	0	0	0	0	0	0	0	1	0	0	0	0	0	1	0	0	0	0	0	0	0	0	0	0	0	0	0	0	0	0	0	0	0	0	0	0
1101:17720:16783__S_066	Bacteria		Chloroflexi	Thermomicrobia	Sphaerobacterales	Sphaerobacteraceae	Sphaerobacter	uncultured Sphaerobacter sp.	0	0	0	0	0	0	0	0	0	0	0	0	0	0	0	0	0	0	0	0	0	0	0	0	0	0	0	0	0	0	0	0	0	0	0	0	0	0	0	0	0
1101:23846:10388__S_053	Bacteria		Chloroflexi	Thermomicrobia	Sphaerobacterales	Sphaerobacteraceae	Sphaerobacter	uncultured Sphaerobacter sp.	0	0	0	0	0	0	0	0	0	2	0	0	0	0	0	0	0	0	0	0	0	0	0	0	0	0	0	0	0	0	0	0	0	0	0	0	0	0	0	0	0
1101:24753:18560__R_026	Bacteria		Chloroflexi	Thermomicrobia	Sphaerobacterales	Sphaerobacteraceae	Sphaerobacter	uncultured Sphaerobacter sp.	0	0	0	0	0	0	0	0	0	0	0	0	0	0	0	0	0	0	0	0	0	0	0	0	0	11	0	0	0	0	0	0	0	0	0	0	0	0	0	0	0
1101:3054:16230__S_064	Bacteria		Chloroflexi	Thermomicrobia	Sphaerobacterales	Sphaerobacteraceae	Sphaerobacter	uncultured Sphaerobacter sp.	0	0	0	0	0	0	0	0	0	0	0	0	0	0	0	0	0	0	0	0	0	0	0	0	0	0	0	0	0	0	0	0	0	0	0	0	0	0	0	0	0
1102:11462:15394__S_066	Bacteria		Chloroflexi	Thermomicrobia	Sphaerobacterales	Sphaerobacteraceae	Sphaerobacter	uncultured Sphaerobacter sp.	0	0	0	0	0	0	0	0	0	0	0	0	0	0	0	0	0	0	0	0	0	0	0	0	0	0	0	0	0	0	0	0	0	0	0	0	0	0	0	0	0
1102:14912:10233__S_044	Bacteria		Chloroflexi	Thermomicrobia	Sphaerobacterales	Sphaerobacteraceae	Sphaerobacter	uncultured Sphaerobacter sp.	0	0	0	0	0	0	0	0	0	0	0	0	0	0	0	0	0	0	0	0	0	0	0	0	0	0	0	0	0	0	0	0	0	0	0	0	0	0	0	0	0
1102:19647:12004__S_077	Bacteria		Chloroflexi	Thermomicrobia	Sphaerobacterales	Sphaerobacteraceae	Sphaerobacter	uncultured Sphaerobacter sp.	0	0	0	0	0	0	0	0	0	0	0	0	0	0	0	0	1	0	0	0	0	0	0	0	0	0	0	0	0	0	0	0	0	3	0	0	0	0	0	0	0
1102:20723:25726__S_118	Bacteria		Chloroflexi	Thermomicrobia	Sphaerobacterales	Sphaerobacteraceae	Sphaerobacter	uncultured Sphaerobacter sp.	0	0	0	0	0	0	0	0	0	0	0	0	0	0	0	0	0	0	0	0	0	0	0	0	1	0	0	0	0	0	0	0	0	0	0	0	0	0	0	0	0
1102:21280:9869__S_079	Bacteria		Chloroflexi	Thermomicrobia	Sphaerobacterales	Sphaerobacteraceae	Sphaerobacter	uncultured Sphaerobacter sp.	0	0	0	0	0	0	0	0	0	0	0	0	0	0	0	0	0	0	0	0	0	0	0	0	0	0	0	0	0	0	0	0	0	0	0	0	0	0	0	0	0
1102:9075:10843__S_131	Bacteria		Chloroflexi	Thermomicrobia	Sphaerobacterales	Sphaerobacteraceae	Sphaerobacter	uncultured Sphaerobacter sp.	0	0	0	0	0	0	0	0	0	0	0	0	0	0	0	0	0	0	0	0	0	0	0	0	0	0	0	0	0	0	0	0	0	0	0	0	0	0	0	0	0
1101:19934:5148__S_131	Bacteria		Chloroflexi	Thermomicrobia	Sphaerobacterales	Sphaerobacteraceae	Sphaerobacter	uncultured Sphaerobacter sp.	0	0	0	0	0	0	0	0	0	0	0	0	0	0	0	0	0	0	0	0	0	0	0	0	0	0	0	0	0	0	0	0	0	0	0	0	0	0	0	0	0
1101:20424:21300__S_071	Bacteria		Chloroflexi	Thermomicrobia	Sphaerobacterales	Sphaerobacteraceae	Sphaerobacter	uncultured Sphaerobacter sp.	0	0	0	0	0	4	0	0	0	0	0	0	0	0	0	0	0	0	0	0	0	0	0	0	0	0	0	0	0	0	0	0	0	0	0	0	0	0	0	0	0
1101:27958:14491__R_095	Bacteria		Chloroflexi	Thermomicrobia	Sphaerobacterales	Sphaerobacteraceae	Sphaerobacter	uncultured Sphaerobacter sp.	0	0	0	0	0	0	0	0	0	0	0	0	0	0	0	0	0	0	0	0	0	0	0	0	0	0	0	0	0	0	0	0	0	0	0	0	0	0	0	0	0
1102:20336:8624__S_128	Bacteria		Chloroflexi	Thermomicrobia	Sphaerobacterales	Sphaerobacteraceae	Sphaerobacter	uncultured Sphaerobacter sp.	0	0	0	0	0	0	0	0	0	0	0	0	0	0	0	0	0	0	0	0	0	0	0	0	0	0	0	0	0	0	0	0	0	0	0	0	0	0	0	0	0
1102:20635:16249__R_030	Bacteria		Chloroflexi	Thermomicrobia	Sphaerobacterales	Sphaerobacteraceae	Sphaerobacter	uncultured Sphaerobacter sp.	0	0	0	0	0	0	0	0	0	0	0	0	0	0	0	3	0	0	0	0	0	0	0	0	0	0	0	0	0	23	0	0	0	0	0	0	0	0	0	0	0
1102:7757:14498__S_057	Bacteria		Chloroflexi	Thermomicrobia	Sphaerobacterales	Sphaerobacteraceae	Sphaerobacter	uncultured Sphaerobacter sp.	0	0	0	0	0	0	0	0	0	0	0	0	0	0	0	0	0	0	0	0	0	0	0	0	0	0	0	0	0	0	0	0	0	0	0	0	0	0	0	0	0
1104:12169:21658__S_053	Bacteria		Chloroflexi	Thermomicrobia	Sphaerobacterales	Sphaerobacteraceae	Sphaerobacter	uncultured Sphaerobacter sp.	0	0	0	0	0	0	0	0	0	0	0	0	0	0	0	0	0	0	0	0	0	0	0	0	0	0	0	0	0	0	0	0	0	0	0	0	0	0	0	0	0
2102:15237:21104__S_062	Bacteria		Chloroflexi	Thermomicrobia	Sphaerobacterales	Sphaerobacteraceae	Sphaerobacter	uncultured Sphaerobacter sp.	0	0	0	1	0	0	0	0	0	0	0	0	0	1	0	5	0	0	14	1	0	0	4	0	80	2	3	0	2	51	0	0	0	0	11	3	0	0	0	0	0
2103:25302:15647__S_109	Bacteria		Chloroflexi	Thermomicrobia	Sphaerobacterales	Sphaerobacteraceae	Sphaerobacter	uncultured Sphaerobacter sp.	5	0	0	0	0	0	0	0	0	0	0	0	2	0	0	0	0	0	0	0	1	0	0	0	0	8	0	0	0	0	0	0	0	0	0	0	0	0	0	0	0
2103:28728:13033__S_083	Bacteria		Chloroflexi	Thermomicrobia	Sphaerobacterales	Sphaerobacteraceae	Sphaerobacter	uncultured Sphaerobacter sp.	0	0	0	0	0	0	0	0	0	0	0	0	0	0	0	0	0	0	0	0	0	0	0	0	0	0	0	0	0	0	0	0	0	0	0	0	0	0	0	0	0
2104:11903:5289__S_045	Bacteria		Chloroflexi	Thermomicrobia	Sphaerobacterales	Sphaerobacteraceae	Sphaerobacter	uncultured Sphaerobacter sp.	0	0	0	0	0	0	0	0	0	0	0	0	0	0	0	0	0	0	0	0	0	0	0	0	0	0	0	0	0	0	0	0	0	0	0	0	0	0	0	0	0
1101:25723:10144__S_045	Bacteria		Chloroflexi	Thermomicrobia	Sphaerobacterales	Sphaerobacteraceae	Sphaerobacter		0	0	0	0	0	0	0	0	0	0	0	0	0	0	0	0	0	0	0	0	0	0	0	0	0	0	0	0	0	0	0	0	0	0	0	0	0	0	0	0	0
1101:8921:10364__S_092	Bacteria		Chloroflexi	Thermomicrobia					0	0	0	0	0	0	0	4	0	0	0	0	0	2	0	0	14	0	0	0	0	0	0	0	0	0	1	0	0	10	0	0	0	0	4	9	0	0	0	0	0
1102:12773:18338__S_042	Bacteria		Chloroflexi	Thermomicrobia					0	0	0	0	0	0	1	0	0	0	0	0	0	0	0	0	0	0	0	0	0	0	0	0	0	0	0	0	0	0	0	0	0	0	0	0	0	0	0	0	0
1101:18714:22117__R_016	Bacteria		Chloroflexi	Thermomicrobia					0	0	0	0	0	2	5	0	0	1	0	0	0	0	0	18	12	0	0	0	0	0	0	0	0	0	0	0	0	0	0	0	0	3	0	7	0	0	0	0	0
1102:17373:21687__S_086	Bacteria		Chloroflexi	Thermomicrobia					0	0	0	0	0	5	0	0	0	0	0	0	0	0	0	0	0	0	0	0	0	0	0	0	0	0	0	0	0	0	0	0	0	0	0	0	0	0	0	0	0
1102:19470:3225__S_055	Bacteria		Chloroflexi	Thermomicrobia					0	0	0	0	0	0	0	0	0	0	0	0	0	0	0	0	0	0	0	0	0	0	0	0	0	0	0	0	0	0	0	0	0	0	0	0	0	0	0	0	0
1102:29547:14721__S_101	Bacteria		Chloroflexi	Thermomicrobia					0	0	0	0	0	0	0	0	0	0	0	0	0	0	0	0	0	0	0	0	0	0	0	0	0	0	0	0	0	0	0	0	0	0	0	0	0	0	0	0	0
1103:10241:21427__S_042	Bacteria		Chloroflexi	Thermomicrobia					0	0	0	0	0	0	0	0	0	0	0	0	0	0	0	0	0	0	0	0	0	0	0	0	0	0	0	0	0	0	0	0	0	0	0	0	0	0	0	0	0
2101:14297:14277__S_104	Bacteria		Chloroflexi	Thermomicrobia					1	0	0	1	0	0	0	0	0	0	0	0	0	0	0	0	0	4	0	0	0	0	0	0	0	0	0	0	0	0	0	0	0	0	0	4	0	0	0	0	0
2101:16372:6350__S_024	Bacteria		Chloroflexi	Thermomicrobia					0	0	0	0	0	0	0	0	0	0	0	0	0	0	0	0	0	0	0	0	0	0	0	0	0	0	0	0	0	0	0	0	0	0	0	0	0	0	0	0	0
2101:18019:4082__R_099	Bacteria		Chloroflexi	Thermomicrobia					0	0	0	0	3	0	0	0	0	0	0	0	0	0	2	0	0	0	0	0	0	0	0	0	0	0	0	0	0	0	0	0	0	0	0	0	0	0	0	0	3
2104:12047:5713__S_052	Bacteria		Chloroflexi	Thermomicrobia					0	0	0	0	0	0	0	0	0	0	0	0	0	0	0	0	0	0	0	0	0	0	0	0	0	0	0	0	0	0	0	0	0	0	0	0	0	0	0	0	0
1103:16326:14206__R_016	Bacteria		Chloroflexi				Kouleothrix		0	0	0	0	0	0	0	0	0	0	0	0	4	0	0	15	0	0	0	0	0	0	0	0	0	0	0	0	1	0	0	0	0	0	0	0	0	0	0	0	0
1101:14640:6243__R_089	Bacteria		Chloroflexi						0	0	0	0	0	0	0	0	0	0	0	0	0	0	0	0	0	0	0	0	0	0	0	0	0	0	0	0	0	0	0	0	0	0	0	0	0	0	0	0	0
1101:26236:6588__S_008	Bacteria		Chloroflexi						0	0	0	0	0	12	0	0	0	0	0	0	0	0	0	0	0	0	0	0	0	0	0	0	0	0	0	0	0	0	0	0	0	0	0	0	0	0	0	0	0
1101:28614:13766__S_104	Bacteria		Chloroflexi						0	0	0	0	0	0	0	0	0	0	0	0	0	0	0	0	0	0	0	0	0	0	0	0	0	0	0	0	0	0	0	0	0	0	0	0	0	0	0	0	0
1101:6298:18983__S_082	Bacteria		Chloroflexi						0	0	0	0	0	0	0	0	0	0	0	0	0	0	0	0	0	0	0	0	0	0	0	0	0	0	0	0	0	0	0	0	0	0	0	0	0	0	0	0	0
1102:19142:14813__S_086	Bacteria		Chloroflexi						0	0	0	0	0	0	0	0	0	0	0	0	0	0	0	0	0	0	0	0	0	0	0	0	0	0	0	0	0	0	0	0	0	0	0	0	0	0	0	0	0
1101:14804:1824__S_038	Bacteria		Chloroflexi						0	0	0	0	0	0	0	0	0	0	0	0	0	0	0	0	0	0	0	0	0	0	0	0	0	0	0	0	0	0	0	0	0	0	0	0	0	0	0	0	0
1101:21510:14644__S_012	Bacteria		Chloroflexi						0	0	0	0	0	0	0	0	0	0	0	0	0	0	0	0	0	0	0	0	0	0	0	0	0	2	0	0	0	0	0	0	0	0	0	0	0	0	0	0	0
1101:25475:6042__S_059	Bacteria		Chloroflexi						0	0	0	0	0	0	0	0	0	0	0	0	0	0	0	0	0	0	0	0	0	0	0	0	0	0	0	0	0	0	0	0	0	0	0	0	0	0	0	0	0
1101:8563:25539__S_086	Bacteria		Chloroflexi						0	0	0	0	0	0	0	0	0	0	0	0	0	0	0	0	0	0	0	0	0	0	0	0	0	0	0	0	0	0	0	0	0	0	0	0	0	0	0	0	0
1102:11664:6313__S_023	Bacteria		Chloroflexi						0	0	0	0	0	0	0	0	0	0	0	0	0	0	0	0	0	0	0	0	0	0	0	0	0	0	0	0	0	0	0	0	0	0	0	0	0	0	0	0	0
1102:13427:7042__S_071	Bacteria		Chloroflexi						0	0	0	0	0	0	0	0	0	0	0	0	0	0	0	0	0	0	0	0	0	0	0	0	0	0	0	0	0	0	0	0	0	0	0	0	0	0	0	0	0
1102:25457:7919__S_074	Bacteria		Chloroflexi						0	0	0	0	0	0	0	0	0	0	0	0	0	0	0	0	0	0	0	0	0	0	0	0	0	0	0	0	0	2	0	0	0	0	0	0	0	0	0	0	0
1102:8207:19901__S_097	Bacteria		Chloroflexi						0	0	0	0	0	0	0	0	0	0	0	0	0	0	0	0	0	0	0	0	0	0	0	0	0	0	0	0	0	0	0	0	0	0	0	0	0	0	0	0	0
1102:9175:18023__S_100	Bacteria		Chloroflexi						0	0	0	0	0	0	0	0	0	0	0	0	0	0	0	0	0	0	0	0	0	0	0	0	0	0	0	0	0	0	0	0	0	0	0	0	0	0	0	0	0
1103:26913:21694__S_100	Bacteria		Chloroflexi						0	0	0	0	0	0	0	0	0	0	0	0	0	0	0	0	0	0	0	0	0	0	0	0	0	0	0	0	0	0	0	0	0	0	0	0	0	0	0	0	0
1104:12608:7552__S_082	Bacteria		Chloroflexi						0	0	0	0	0	0	0	0	0	0	0	0	0	0	0	0	0	0	0	0	0	0	0	0	0	0	0	0	0	0	0	0	0	0	0	0	0	0	0	0	0
2101:14954:22235__S_027	Bacteria		Chloroflexi						0	0	0	0	0	0	0	0	0	0	0	0	0	0	0	0	0	0	0	0	0	0	0	0	0	0	0	0	0	0	0	0	0	0	0	0	0	0	0	0	0
2102:12880:23687__S_046	Bacteria		Chloroflexi						0	0	0	0	0	0	0	0	0	0	0	0	0	0	0	0	0	0	0	0	0	0	0	0	0	0	0	0	0	0	0	0	0	0	0	0	0	0	0	0	0
2102:16361:10201__S_086	Bacteria		Chloroflexi						0	0	0	0	0	0	0	0	0	0	0	0	0	0	0	0	0	0	0	0	0	0	0	0	0	0	0	0	0	0	0	0	0	0	0	0	0	0	0	0	0
2104:13632:17922__S_006	Bacteria		Chloroflexi						0	0	0	0	0	0	0	0	0	0	0	0	0	0	0	0	0	0	0	0	0	0	0	0	0	0	0	0	0	0	0	0	0	0	0	0	0	0	0	0	0
1102:19899:7366__S_067	Bacteria		Cyanobacteria		Chroococcales	Cyanobacteriaceae	Cyanobacterium	uncultured Cyanobacterium sp.	0	0	0	0	0	0	0	0	0	0	0	0	0	0	0	0	0	0	0	0	0	0	0	0	0	0	0	0	0	0	0	0	0	0	0	0	0	0	0	0	0
1102:20939:19896__S_116	Bacteria		Cyanobacteria		Nostocales	Symphyonemataceae	Loriellopsis	uncultured Loriellopsis sp.	0	0	0	0	0	0	0	0	0	0	0	0	0	0	0	0	0	0	0	0	0	0	0	0	0	0	0	0	0	0	0	0	0	0	0	0	0	0	0	0	0
1101:28141:19102__R_009	Bacteria		Cyanobacteria		Synechococcales				0	0	0	0	0	0	0	0	12	0	0	0	0	1	0	0	0	0	0	0	0	0	0	0	0	0	0	0	0	0	0	0	0	0	0	0	0	0	0	0	0
1103:12786:11122__S_070	Bacteria		Deinococcus-Thermus	Deinococci	Thermales	Thermaceae	Thermus		0	0	0	0	0	0	0	0	0	0	0	0	0	0	0	0	0	0	0	0	0	0	0	0	0	0	0	0	0	0	0	0	0	0	0	0	0	0	0	0	0
1101:14587:17395__S_043	Bacteria		Elusimicrobia	Elusimicrobia	Elusimicrobiales	Elusimicrobiaceae	Elusimicrobium	uncultured Elusimicrobium sp.	0	0	0	0	0	0	0	0	0	0	0	0	0	0	0	0	0	0	0	0	0	0	0	0	0	0	0	0	0	0	0	0	0	0	0	0	0	0	0	0	0
1101:17069:15144__S_006	Bacteria		Elusimicrobia	Elusimicrobia	Elusimicrobiales	Elusimicrobiaceae	Elusimicrobium	uncultured Elusimicrobium sp.	0	0	0	0	0	0	0	0	0	0	0	0	0	0	0	0	1	0	0	0	0	0	0	0	0	0	0	0	0	0	0	0	0	0	0	0	0	0	0	0	0
1102:10163:14883__S_052	Bacteria		Elusimicrobia	Elusimicrobia	Elusimicrobiales	Elusimicrobiaceae	Elusimicrobium	uncultured Elusimicrobium sp.	0	0	0	0	0	0	0	0	0	0	0	0	0	0	0	0	0	0	0	0	0	0	0	0	0	0	0	0	0	0	0	0	0	0	0	0	0	0	0	0	0
1102:11144:2696__S_029	Bacteria		Elusimicrobia	Elusimicrobia	Elusimicrobiales	Elusimicrobiaceae	Elusimicrobium	uncultured Elusimicrobium sp.	0	0	0	0	0	0	0	0	0	0	0	0	0	0	0	0	0	0	0	0	0	0	0	0	0	0	0	0	0	0	0	0	0	0	0	0	0	0	0	0	0
1102:24926:5814__S_012	Bacteria		Elusimicrobia	Elusimicrobia	Elusimicrobiales	Elusimicrobiaceae	Elusimicrobium	uncultured Elusimicrobium sp.	0	0	0	0	0	0	0	0	0	0	0	0	0	0	0	0	0	0	0	0	0	0	0	0	0	0	0	0	0	0	0	0	0	0	0	0	0	0	0	0	0
1102:28636:18453__S_073	Bacteria		Elusimicrobia	Elusimicrobia	Elusimicrobiales	Elusimicrobiaceae	Elusimicrobium	uncultured Elusimicrobium sp.	0	0	0	0	0	0	0	0	0	0	0	0	0	0	0	0	0	0	0	0	0	0	0	0	0	0	0	0	0	0	0	0	0	0	0	0	0	0	0	0	0
1101:20695:27901__R_025	Bacteria		Elusimicrobia	Elusimicrobia	Elusimicrobiales	Elusimicrobiaceae	Elusimicrobium	uncultured Elusimicrobium sp.	0	0	0	0	0	0	0	0	0	0	0	0	2	0	0	0	1	1	0	0	0	0	0	0	14	1	0	0	0	1	0	3	0	0	0	0	0	0	0	0	0
1101:3112:16020__S_030	Bacteria		Elusimicrobia	Elusimicrobia	Elusimicrobiales	Elusimicrobiaceae	Elusimicrobium	uncultured Elusimicrobium sp.	0	0	0	0	0	0	0	0	0	0	0	0	0	0	0	0	0	0	0	0	0	0	0	0	0	0	0	0	0	0	0	0	0	0	0	0	0	0	0	0	0
1102:12923:17185__S_119	Bacteria		Elusimicrobia	Elusimicrobia	Elusimicrobiales	Elusimicrobiaceae	Elusimicrobium	uncultured Elusimicrobium sp.	0	0	0	0	0	0	0	0	0	0	0	0	0	0	0	0	0	0	0	0	0	0	0	0	0	0	0	0	0	0	0	0	0	0	0	0	0	0	0	0	0
1102:22985:17926__S_060	Bacteria		Elusimicrobia	Elusimicrobia	Elusimicrobiales	Elusimicrobiaceae	Elusimicrobium	uncultured Elusimicrobium sp.	0	0	0	0	0	0	0	0	0	0	0	0	0	0	0	0	0	0	0	0	0	0	0	0	0	0	0	0	0	0	0	0	0	0	0	0	0	0	0	0	0
1102:26013:20800__S_023	Bacteria		Elusimicrobia	Elusimicrobia	Elusimicrobiales	Elusimicrobiaceae	Elusimicrobium	uncultured Elusimicrobium sp.	0	0	0	0	0	0	0	0	0	0	0	0	0	0	0	0	0	0	0	0	0	0	0	0	0	0	0	0	0	0	0	0	0	0	0	0	0	0	0	0	0
1102:9533:18506__S_111	Bacteria		Elusimicrobia	Elusimicrobia	Elusimicrobiales	Elusimicrobiaceae	Elusimicrobium	uncultured Elusimicrobium sp.	0	0	0	0	0	0	0	0	0	0	0	0	0	0	0	0	0	0	0	0	0	0	0	0	0	0	0	0	0	0	0	0	0	0	0	0	0	0	0	0	0
1103:19753:18871__S_051	Bacteria		Elusimicrobia	Elusimicrobia	Elusimicrobiales	Elusimicrobiaceae	Elusimicrobium	uncultured Elusimicrobium sp.	0	0	0	0	0	0	0	0	0	0	0	0	0	0	0	0	0	0	0	0	0	0	0	0	0	0	0	0	0	0	0	0	0	0	0	0	0	0	0	0	0
1104:6679:17666__S_001	Bacteria		Elusimicrobia	Elusimicrobia	Elusimicrobiales	Elusimicrobiaceae	Elusimicrobium	uncultured Elusimicrobium sp.	0	0	0	0	0	0	0	0	0	0	0	0	0	0	0	0	0	0	0	0	0	0	0	0	0	0	0	0	0	0	0	0	0	0	0	0	0	0	0	0	0
2102:14341:17135__S_075	Bacteria		Elusimicrobia	Elusimicrobia	Elusimicrobiales	Elusimicrobiaceae	Elusimicrobium	uncultured Elusimicrobium sp.	0	0	0	0	0	0	0	0	0	0	0	0	0	0	0	0	0	0	0	0	0	0	0	0	0	0	0	0	0	0	0	0	0	0	0	0	0	0	0	0	0
2102:6271:20719__S_101	Bacteria		Elusimicrobia	Elusimicrobia	Elusimicrobiales	Elusimicrobiaceae	Elusimicrobium	uncultured Elusimicrobium sp.	0	0	0	0	0	0	0	0	0	0	0	0	0	0	0	0	0	0	0	0	0	0	0	0	0	0	0	0	0	0	0	0	0	0	0	0	0	0	0	0	0
1102:13054:20757__R_003	Bacteria		Firmicutes	Bacilli	Bacillales	Alicyclobacillaceae	Tumebacillus	uncultured Tumebacillus sp.	0	0	5	0	0	0	0	0	0	0	0	0	0	0	0	0	0	0	0	0	0	0	0	0	0	0	0	0	0	0	0	0	0	2	0	0	0	0	0	0	0
1101:11296:18930__S_073	Bacteria		Firmicutes	Bacilli	Bacillales	Alicyclobacillaceae	Tumebacillus		0	0	0	0	0	0	0	0	0	0	0	0	0	0	0	0	0	0	0	0	0	0	0	0	0	0	0	0	0	0	0	0	0	0	0	0	0	0	0	0	0
1102:4486:19860__R_110	Bacteria		Firmicutes	Bacilli	Bacillales	Alicyclobacillaceae	Tumebacillus		0	0	0	0	0	0	0	1	0	0	0	0	0	0	0	0	0	0	0	0	0	0	0	0	0	0	0	0	0	0	0	0	0	0	0	0	0	0	0	0	0
2104:24008:22576__R_038	Bacteria		Firmicutes	Bacilli	Bacillales	Alicyclobacillaceae	Tumebacillus		0	0	0	0	0	0	0	0	0	0	0	0	0	0	0	0	0	0	0	0	0	0	0	0	0	0	0	0	0	0	0	0	0	0	0	0	0	27	0	0	0
1101:25714:22565__R_049	Bacteria		Firmicutes	Bacilli	Bacillales	Alicyclobacillaceae			19	9	1	2	0	4	0	6	8	0	5	0	7	4	3	0	1	0	21	0	0	24	8	0	0	4	3	0	0	29	0	0	0	4	4	16	0	0	0	0	4
1101:13520:7659__S_001	Bacteria		Firmicutes	Bacilli	Bacillales	Bacillaceae	Bacillus	uncultured Bacillus sp.	0	0	0	0	0	0	0	0	0	0	0	0	0	0	0	0	0	0	0	0	0	0	0	0	0	0	0	0	0	0	0	0	0	0	0	0	0	0	0	0	0
1103:11420:24902__S_118	Bacteria		Firmicutes	Bacilli	Bacillales	Bacillaceae	Bacillus	uncultured Bacillus sp.	0	0	0	0	0	0	0	0	0	0	0	0	0	0	0	0	0	0	0	0	0	0	0	0	0	0	0	0	0	0	0	0	0	0	0	0	0	0	0	0	0
1101:14817:16083__R_015	Bacteria		Firmicutes	Bacilli	Bacillales	Bacillaceae	Bacillus		0	0	0	2	10	1	3	0	0	0	0	0	0	0	20	0	0	0	1	0	0	0	0	0	0	0	7	0	0	0	0	0	0	0	0	0	0	0	0	1	0
1101:15317:23862__S_107	Bacteria		Firmicutes	Bacilli	Bacillales	Bacillaceae	Bacillus		4	0	0	1	0	0	0	0	0	0	0	0	0	0	0	0	0	0	0	0	0	0	0	0	0	0	0	0	0	0	0	0	0	0	0	0	0	0	0	0	0
1101:16546:14047__R_126	Bacteria		Firmicutes	Bacilli	Bacillales	Bacillaceae	Bacillus		0	0	0	4	0	0	0	0	0	0	0	0	0	0	0	0	0	0	0	0	0	0	0	0	0	0	0	0	0	0	0	0	0	0	0	0	0	0	0	0	0
1101:18268:8588__S_070	Bacteria		Firmicutes	Bacilli	Bacillales	Bacillaceae	Bacillus		15	4	0	2	0	3	0	3	0	0	0	0	0	2	1	0	1	0	0	1	1	0	0	0	0	0	0	0	0	0	0	0	0	0	0	3	0	0	0	0	0
1101:21375:20556__S_015	Bacteria		Firmicutes	Bacilli	Bacillales	Bacillaceae	Bacillus		0	0	0	4	0	0	0	1	1	0	0	0	0	0	0	0	0	1	0	0	0	0	0	0	0	0	0	0	0	0	0	0	0	0	0	0	0	0	0	0	0
1101:2557:18961__S_011	Bacteria		Firmicutes	Bacilli	Bacillales	Bacillaceae	Bacillus		0	0	0	0	0	0	0	0	0	0	0	0	0	0	0	0	0	0	0	0	0	0	0	0	0	0	0	0	0	0	0	0	0	0	0	0	0	0	0	0	0
1101:6697:13376__R_016	Bacteria		Firmicutes	Bacilli	Bacillales	Bacillaceae	Bacillus		0	0	0	0	0	0	0	0	0	0	0	0	0	0	0	4	0	0	0	0	0	0	0	0	0	0	0	0	0	0	0	0	0	0	0	0	0	0	0	0	0
1101:7459:20959__S_053	Bacteria		Firmicutes	Bacilli	Bacillales	Bacillaceae	Bacillus		38	0	0	0	0	0	0	0	0	0	0	0	0	0	0	0	0	0	0	3	0	0	0	0	0	0	0	0	0	0	0	0	0	0	0	0	0	0	0	0	0
1102:13037:2264__R_081	Bacteria		Firmicutes	Bacilli	Bacillales	Bacillaceae	Bacillus		0	0	0	0	0	0	0	1	0	0	0	0	0	0	0	0	0	0	0	0	0	0	0	0	2	0	1	0	0	0	0	0	0	0	0	0	0	0	0	0	0
1102:16571:14034__R_111	Bacteria		Firmicutes	Bacilli	Bacillales	Bacillaceae	Bacillus		0	0	0	0	0	0	0	0	0	0	0	0	0	1	0	0	0	0	0	0	0	0	0	0	0	0	0	0	0	0	0	0	0	0	0	0	0	0	0	0	0
1102:18989:12569__S_102	Bacteria		Firmicutes	Bacilli	Bacillales	Bacillaceae	Bacillus		0	0	0	0	0	0	0	0	0	0	0	0	0	0	0	0	0	0	0	0	0	0	0	0	0	0	0	0	0	0	0	0	0	0	0	0	0	0	0	0	0
1102:21340:10173__S_059	Bacteria		Firmicutes	Bacilli	Bacillales	Bacillaceae	Bacillus		0	0	0	0	0	0	0	0	0	0	0	0	0	0	0	0	0	0	0	0	0	0	0	0	0	0	0	0	0	0	0	0	0	0	0	0	0	0	0	0	0
1102:26492:20597__S_050	Bacteria		Firmicutes	Bacilli	Bacillales	Bacillaceae	Bacillus		0	0	0	0	0	0	0	0	0	0	0	0	0	0	0	0	0	0	0	0	0	0	0	0	0	0	0	0	0	0	0	0	0	0	0	0	0	0	0	0	0
1102:26535:21810__R_023	Bacteria		Firmicutes	Bacilli	Bacillales	Bacillaceae	Bacillus		0	0	0	0	0	0	1	1	0	0	0	0	0	0	0	0	1	0	0	0	0	0	1	0	3	0	0	0	0	0	0	0	0	0	0	0	0	0	0	0	0
1101:12816:14156__R_032	Bacteria		Firmicutes	Bacilli	Bacillales	Bacillaceae	Bacillus		0	0	0	0	0	1	0	0	0	0	0	0	0	0	0	0	0	0	0	0	0	0	0	0	0	0	0	0	0	0	0	6	0	0	0	0	0	0	0	0	0
1101:18533:17390__S_011	Bacteria		Firmicutes	Bacilli	Bacillales	Bacillaceae	Bacillus		0	0	0	0	0	0	0	0	0	0	0	0	0	0	0	0	0	0	0	0	0	0	0	0	0	0	0	0	0	0	0	0	0	0	0	0	0	0	0	0	0
1101:22020:22745__R_055	Bacteria		Firmicutes	Bacilli	Bacillales	Bacillaceae	Bacillus		0	0	0	0	0	0	0	0	0	0	0	0	0	0	0	0	0	0	0	0	0	0	0	0	0	0	0	0	0	0	0	0	0	0	0	0	0	0	0	0	0
1101:25712:19560__R_056	Bacteria		Firmicutes	Bacilli	Bacillales	Bacillaceae	Bacillus		0	0	0	0	0	2	0	0	0	0	0	0	0	0	0	0	8	0	2	0	0	0	0	0	0	0	0	0	0	0	0	0	0	1	0	0	0	0	0	0	0
1101:9901:12712__R_131	Bacteria		Firmicutes	Bacilli	Bacillales	Bacillaceae	Bacillus		0	0	0	0	0	0	0	0	0	0	0	0	0	0	0	0	0	0	0	0	0	0	0	0	0	0	0	0	0	0	0	0	0	0	0	0	0	0	0	0	0
1102:19067:10784__S_068	Bacteria		Firmicutes	Bacilli	Bacillales	Bacillaceae	Bacillus		0	0	0	0	0	0	0	0	0	0	0	0	0	0	0	0	0	0	0	0	0	3	0	0	0	0	0	0	0	0	0	0	0	0	0	0	0	0	0	0	0
1103:14574:22154__S_062	Bacteria		Firmicutes	Bacilli	Bacillales	Bacillaceae	Bacillus		0	0	0	0	0	0	0	2	0	0	0	0	0	0	0	0	0	0	0	0	0	0	0	0	0	0	0	0	0	0	0	0	0	0	0	0	0	0	0	0	0
1104:5429:7611__S_088	Bacteria		Firmicutes	Bacilli	Bacillales	Bacillaceae	Bacillus		0	0	0	0	0	0	0	0	0	0	0	0	0	0	0	0	0	0	0	0	0	0	0	0	0	0	0	0	0	0	0	0	0	0	0	0	0	0	0	0	0
1104:6071:14160__R_027	Bacteria		Firmicutes	Bacilli	Bacillales	Bacillaceae	Bacillus		50	2	2	25	25	16	26	28	2	2	1	0	57	2	267	22	3	23	8	3	13	7	18	0	421	1	493	0	3	6	0	1	4	0	2	26	0	5	16	0	2
2101:15846:16382__S_064	Bacteria		Firmicutes	Bacilli	Bacillales	Bacillaceae	Bacillus		0	0	1	0	0	0	0	0	0	0	0	0	0	0	0	0	0	0	0	0	0	0	0	0	0	0	0	0	0	0	0	0	0	0	0	1	0	0	0	0	0
2102:15773:6839__S_021	Bacteria		Firmicutes	Bacilli	Bacillales	Bacillaceae	Bacillus		0	0	0	0	0	0	0	0	0	0	0	0	0	0	0	0	0	0	0	0	0	0	0	0	0	0	0	0	0	0	0	0	0	0	0	0	0	0	0	0	0
2104:14428:23812__S_048	Bacteria		Firmicutes	Bacilli	Bacillales	Bacillaceae	Bacillus		0	0	0	0	0	0	0	0	0	0	0	0	0	0	0	0	0	0	0	0	0	0	0	0	0	0	0	0	0	0	0	0	0	0	0	0	0	0	0	0	0
1101:12675:5397__S_014	Bacteria		Firmicutes	Bacilli	Bacillales	Bacillaceae			0	0	0	0	0	0	0	0	0	0	0	0	0	0	0	1	0	0	0	0	0	0	0	0	0	0	1	0	0	0	0	0	0	0	0	0	0	0	0	0	0
1101:15756:22481__S_089	Bacteria		Firmicutes	Bacilli	Bacillales	Bacillaceae			0	0	0	0	0	0	0	0	0	0	0	0	0	0	0	0	0	0	0	0	0	0	0	0	0	0	0	0	0	0	0	0	0	0	0	0	0	1	0	0	0
1101:23106:16342__R_112	Bacteria		Firmicutes	Bacilli	Bacillales	Bacillaceae			0	0	0	0	0	0	1	0	0	0	0	0	0	0	1	0	0	0	0	0	0	0	0	0	0	0	2	0	0	0	0	0	0	0	0	0	0	0	0	0	0
1101:8608:14622__R_056	Bacteria		Firmicutes	Bacilli	Bacillales	Bacillaceae			0	0	0	0	0	0	0	0	0	0	0	0	0	3	0	0	0	0	0	0	0	0	0	0	0	0	0	0	0	0	0	0	0	0	0	0	0	0	0	0	0
1102:16048:6141__R_057	Bacteria		Firmicutes	Bacilli	Bacillales	Bacillaceae			0	0	0	1	0	0	0	0	0	0	0	0	0	0	0	0	0	0	0	0	0	0	0	0	0	0	0	0	0	0	0	0	0	0	0	0	0	0	0	0	0
1102:18758:19776__S_079	Bacteria		Firmicutes	Bacilli	Bacillales	Bacillaceae			0	0	0	0	0	0	0	0	0	0	0	0	0	0	0	0	0	0	0	0	0	0	0	0	0	0	2	0	0	0	0	0	0	0	0	0	0	0	0	0	0
1101:12253:12379__S_055	Bacteria		Firmicutes	Bacilli	Bacillales	Bacillaceae			0	0	0	0	0	0	0	1	0	0	0	0	0	0	0	0	0	0	0	0	0	0	0	0	0	0	1	0	0	0	0	0	0	0	0	0	0	0	0	0	0
1102:10097:25087__S_015	Bacteria		Firmicutes	Bacilli	Bacillales	Bacillaceae			0	0	0	0	0	0	0	0	0	0	0	0	0	0	0	0	0	0	0	0	0	0	0	0	0	0	0	0	0	0	0	0	0	0	0	0	0	0	0	0	0
1103:15579:2882__S_056	Bacteria		Firmicutes	Bacilli	Bacillales	Bacillaceae			0	0	0	0	0	0	0	0	0	0	0	0	0	0	0	0	0	0	0	0	0	0	0	0	0	0	0	0	0	0	0	0	0	0	0	0	0	0	0	0	0
1103:9770:4029__S_074	Bacteria		Firmicutes	Bacilli	Bacillales	Bacillaceae			0	0	0	0	0	0	0	0	0	0	0	0	0	0	0	0	0	0	0	0	0	0	0	0	0	0	0	0	0	0	0	0	0	0	0	0	0	0	0	0	0
2103:9451:18674__R_036	Bacteria		Firmicutes	Bacilli	Bacillales	Bacillaceae			0	0	0	0	0	0	0	0	0	0	0	0	0	0	0	0	0	0	0	0	0	0	0	0	0	0	0	0	0	0	0	0	0	0	0	2	0	0	0	0	0
1102:26891:20536__R_120	Bacteria		Firmicutes	Bacilli	Bacillales	Paenibacillaceae	Ammoniphilus		0	0	0	0	0	1	0	0	0	0	0	0	0	0	0	0	0	0	0	0	0	0	2	0	0	0	0	0	0	0	0	0	0	0	0	0	0	0	0	0	0
2103:17267:9955__R_056	Bacteria		Firmicutes	Bacilli	Bacillales	Paenibacillaceae	Ammoniphilus		0	0	0	0	2	0	0	0	0	0	0	0	0	0	0	0	0	1	0	0	0	0	0	0	0	0	0	0	0	0	0	0	0	0	0	0	0	0	0	0	0
1101:22767:9529__R_009	Bacteria		Firmicutes	Bacilli	Bacillales	Paenibacillaceae	Brevibacillus		0	0	0	0	0	0	0	0	6	0	0	0	0	0	0	0	0	0	0	0	0	0	0	0	0	0	0	0	0	0	0	0	0	0	0	0	0	0	0	0	0
1101:13902:24256__R_004	Bacteria		Firmicutes	Bacilli	Bacillales	Paenibacillaceae	Cohnella		0	3	0	21	2	0	0	0	0	0	0	0	0	1	6	0	0	0	0	0	3	0	0	0	12	0	5	0	0	0	0	0	11	0	0	2	0	1	0	34	0
1101:25114:5818__R_038	Bacteria		Firmicutes	Bacilli	Bacillales	Paenibacillaceae	Paenibacillus	uncultured Paenibacillus sp.	0	0	0	0	0	0	0	0	0	0	0	0	0	0	0	0	0	0	0	0	0	0	0	0	0	0	0	0	0	0	0	0	0	0	0	0	0	9	0	0	0
1101:3981:12197__R_131	Bacteria		Firmicutes	Bacilli	Bacillales	Paenibacillaceae	Paenibacillus	uncultured Paenibacillus sp.	0	0	0	0	0	0	0	0	0	0	0	0	0	0	0	0	0	0	0	0	0	0	0	0	0	0	0	0	0	0	0	0	0	0	0	2	0	0	0	0	0
1101:10680:27503__R_052	Bacteria		Firmicutes	Bacilli	Bacillales	Paenibacillaceae	Paenibacillus		0	0	0	0	0	0	0	0	0	0	0	0	0	0	2	0	0	0	0	0	0	0	0	0	0	0	0	0	0	0	0	0	0	0	0	0	0	0	0	0	0
1101:10734:18783__R_042	Bacteria		Firmicutes	Bacilli	Bacillales	Paenibacillaceae	Paenibacillus		0	0	0	0	0	0	0	0	0	0	0	0	0	0	0	0	0	0	0	0	0	0	0	0	0	0	0	0	0	0	0	0	0	0	0	0	0	0	0	0	0
1101:14150:7413__R_088	Bacteria		Firmicutes	Bacilli	Bacillales	Paenibacillaceae	Paenibacillus		0	0	1	0	0	0	0	3	0	0	0	0	0	3	0	0	0	0	0	0	2	0	0	0	0	0	0	0	0	0	0	0	0	1	0	0	0	0	0	0	0
1101:15331:21344__S_095	Bacteria		Firmicutes	Bacilli	Bacillales	Paenibacillaceae	Paenibacillus		0	0	0	0	0	0	0	0	0	0	0	0	0	0	0	0	0	0	0	0	0	0	0	0	0	0	0	0	0	0	0	0	0	0	0	0	0	0	0	0	0
1101:19382:24174__S_025	Bacteria		Firmicutes	Bacilli	Bacillales	Paenibacillaceae	Paenibacillus		0	0	0	0	0	0	0	0	0	0	0	0	0	0	0	0	0	0	0	0	0	0	0	0	0	0	0	0	0	0	0	0	0	0	0	0	0	0	0	0	0
1101:24822:11855__R_089	Bacteria		Firmicutes	Bacilli	Bacillales	Paenibacillaceae	Paenibacillus		0	0	0	1	0	0	0	0	0	1	0	0	0	1	0	0	0	0	0	0	0	0	0	0	0	0	0	0	0	0	0	0	0	0	0	0	0	0	0	0	0
1102:12190:5969__R_024	Bacteria		Firmicutes	Bacilli	Bacillales	Paenibacillaceae	Paenibacillus		0	0	0	0	0	0	0	0	0	0	0	0	0	0	0	0	0	0	0	0	0	0	0	57	0	0	0	0	0	0	0	0	0	0	0	0	0	0	0	0	0
1102:12567:5536__S_048	Bacteria		Firmicutes	Bacilli	Bacillales	Paenibacillaceae	Paenibacillus		0	0	0	0	0	0	0	0	0	0	0	0	0	0	2	0	0	0	0	0	0	0	0	0	0	0	0	0	0	0	0	0	0	0	0	0	0	0	0	0	0
1102:15524:27418__R_014	Bacteria		Firmicutes	Bacilli	Bacillales	Paenibacillaceae	Paenibacillus		0	0	0	0	0	0	0	0	0	0	0	0	0	11	0	0	0	0	0	0	0	0	0	0	0	0	0	0	0	0	0	0	0	0	0	0	0	0	0	0	0
1102:16542:28024__R_121	Bacteria		Firmicutes	Bacilli	Bacillales	Paenibacillaceae	Paenibacillus		1	0	0	2	0	0	0	2	0	0	0	0	0	0	0	0	0	0	0	0	0	0	0	0	0	0	0	1	0	0	0	0	0	0	0	0	0	0	0	0	0
1102:17235:4432__R_014	Bacteria		Firmicutes	Bacilli	Bacillales	Paenibacillaceae	Paenibacillus		0	0	0	1	0	0	0	0	0	1	1	0	0	31	0	0	0	0	0	0	0	2	0	0	0	0	0	0	0	0	0	0	0	0	1	0	0	0	0	0	0
1102:19097:15864__S_102	Bacteria		Firmicutes	Bacilli	Bacillales	Paenibacillaceae	Paenibacillus		0	0	0	0	0	0	0	0	0	0	0	0	0	0	0	0	0	0	0	0	0	0	0	0	0	0	0	0	0	0	0	0	0	0	0	0	0	0	0	0	0
1102:22211:14374__R_122	Bacteria		Firmicutes	Bacilli	Bacillales	Paenibacillaceae	Paenibacillus		0	0	0	0	0	0	0	0	0	0	0	0	0	0	0	0	0	0	0	0	0	0	0	0	0	1	0	0	0	0	0	0	0	0	0	0	0	0	0	0	0
1102:9583:5296__S_072	Bacteria		Firmicutes	Bacilli	Bacillales	Paenibacillaceae	Paenibacillus		0	0	0	0	0	0	0	0	0	0	0	0	0	0	0	0	0	0	0	0	0	0	0	0	0	0	0	0	0	0	0	0	0	0	0	0	0	0	0	18	0
1102:9739:24594__R_004	Bacteria		Firmicutes	Bacilli	Bacillales	Paenibacillaceae	Paenibacillus		0	0	0	2	0	2	0	0	0	0	0	0	0	0	0	0	0	0	0	0	0	0	0	0	0	0	0	0	0	0	0	0	1	0	0	0	0	0	0	0	0
1101:10082:17035__S_060	Bacteria		Firmicutes	Bacilli	Bacillales	Paenibacillaceae	Paenibacillus		0	0	0	0	0	0	0	0	0	0	0	0	0	0	1	0	0	0	0	0	0	0	0	0	0	0	0	0	0	0	0	0	0	0	0	0	0	0	0	0	0
1101:11483:15867__S_089	Bacteria		Firmicutes	Bacilli	Bacillales	Paenibacillaceae	Paenibacillus		0	0	0	0	0	0	0	0	0	0	0	0	0	0	0	0	0	0	0	0	0	0	0	0	0	0	0	0	0	0	0	0	0	0	0	0	0	0	0	0	0
1101:12468:19050__S_069	Bacteria		Firmicutes	Bacilli	Bacillales	Paenibacillaceae	Paenibacillus		0	0	0	0	0	0	0	0	0	0	0	0	0	0	1	0	0	0	0	0	0	0	0	0	0	0	0	0	0	0	0	0	0	0	0	0	0	0	0	0	0
1101:18153:20310__S_021	Bacteria		Firmicutes	Bacilli	Bacillales	Paenibacillaceae	Paenibacillus		0	0	0	0	0	0	0	0	0	0	0	0	0	0	0	0	0	0	0	0	0	0	0	0	0	0	0	0	0	0	0	0	0	0	0	0	0	0	0	0	0
1101:20477:19361__R_109	Bacteria		Firmicutes	Bacilli	Bacillales	Paenibacillaceae	Paenibacillus		0	0	0	0	0	0	0	0	0	0	0	0	0	0	2	0	0	0	0	0	0	0	0	0	0	0	1	0	0	0	0	0	0	0	0	0	0	5	0	0	0
1102:10791:12893__R_091	Bacteria		Firmicutes	Bacilli	Bacillales	Paenibacillaceae	Paenibacillus		0	0	0	0	1	0	0	0	0	0	0	0	0	1	0	0	0	0	0	0	0	0	0	0	0	0	0	0	0	0	0	0	0	0	0	0	0	0	0	0	0
1102:17910:5287__R_011	Bacteria		Firmicutes	Bacilli	Bacillales	Paenibacillaceae	Paenibacillus		0	0	0	0	0	0	0	0	0	0	6	0	0	0	0	0	0	0	0	0	0	0	0	0	0	0	0	0	0	0	0	0	0	0	0	0	0	0	0	0	0
1102:19758:15896__R_025	Bacteria		Firmicutes	Bacilli	Bacillales	Paenibacillaceae	Paenibacillus		0	0	0	0	0	0	0	0	0	0	0	0	0	0	0	0	0	0	0	0	0	0	0	0	12	0	0	0	0	0	0	0	0	0	0	0	0	0	0	0	0
1103:10905:15874__S_026	Bacteria		Firmicutes	Bacilli	Bacillales	Paenibacillaceae	Paenibacillus		0	0	0	0	0	0	0	0	0	0	0	0	0	0	0	0	0	0	0	0	0	0	0	0	0	0	0	0	0	0	0	0	0	0	0	0	0	0	0	0	0
1103:13877:18890__S_024	Bacteria		Firmicutes	Bacilli	Bacillales	Paenibacillaceae	Paenibacillus		2	0	0	0	0	0	0	0	0	0	0	0	0	0	0	0	0	0	0	0	0	0	0	0	0	0	0	0	0	0	0	0	0	0	0	0	0	0	0	0	0
1103:20715:23254__R_090	Bacteria		Firmicutes	Bacilli	Bacillales	Paenibacillaceae	Paenibacillus		0	0	0	0	0	0	0	0	0	0	0	0	0	0	0	0	0	0	0	0	0	0	0	0	0	0	0	0	0	0	0	0	0	0	0	0	0	0	0	0	2
1104:11400:15487__R_096	Bacteria		Firmicutes	Bacilli	Bacillales	Paenibacillaceae	Paenibacillus		0	0	0	0	0	0	0	0	0	0	0	0	0	0	0	0	0	0	0	0	0	0	0	0	0	4	0	0	0	0	0	0	0	0	0	0	0	0	0	0	0
1104:20519:17091__R_100	Bacteria		Firmicutes	Bacilli	Bacillales	Paenibacillaceae	Paenibacillus		0	0	0	0	0	0	0	0	0	0	0	0	0	0	0	0	0	0	0	0	0	0	0	0	0	0	0	0	2	0	0	0	0	0	0	0	0	0	0	0	0
1104:22203:8774__R_126	Bacteria		Firmicutes	Bacilli	Bacillales	Paenibacillaceae	Paenibacillus		0	0	0	31	0	1	6	0	0	2	0	0	4	8	1	0	2	1	0	0	9	0	0	0	1	0	3	0	0	0	0	0	8	0	0	18	0	0	0	0	0
2101:21842:7097__R_004	Bacteria		Firmicutes	Bacilli	Bacillales	Paenibacillaceae	Paenibacillus		0	0	0	5	0	3	0	0	0	0	0	0	0	0	0	0	7	0	0	0	0	0	0	0	0	0	0	0	0	0	0	0	0	0	1	0	0	0	0	0	0
2101:2589:14175__S_066	Bacteria		Firmicutes	Bacilli	Bacillales	Paenibacillaceae	Paenibacillus		0	0	0	0	0	0	0	0	0	0	0	0	0	0	0	0	0	0	0	0	0	0	0	0	0	0	0	0	0	0	0	0	0	0	0	0	0	0	0	0	0
2102:13871:4541__R_015	Bacteria		Firmicutes	Bacilli	Bacillales	Paenibacillaceae	Paenibacillus		0	0	0	0	0	0	0	0	0	0	0	0	0	0	10	0	0	0	0	0	0	0	0	0	0	0	0	0	0	0	0	0	0	0	0	0	0	0	0	0	0
2102:24402:10179__R_025	Bacteria		Firmicutes	Bacilli	Bacillales	Paenibacillaceae	Paenibacillus		0	0	0	0	0	0	0	0	0	0	0	0	0	0	0	0	0	0	0	0	0	0	0	0	11	0	0	0	0	0	0	0	0	5	0	0	0	0	0	5	0
2104:14139:20289__R_063	Bacteria		Firmicutes	Bacilli	Bacillales	Paenibacillaceae	Paenibacillus		0	0	0	0	0	1	0	0	0	0	0	0	0	0	0	0	0	0	0	0	0	0	0	0	0	0	0	0	0	0	0	0	0	0	0	3	0	0	0	0	0
1101:21056:20622__S_054	Bacteria		Firmicutes	Bacilli	Bacillales	Paenibacillaceae	Thermobacillus		0	0	0	0	0	0	0	0	0	0	0	0	0	0	0	0	0	0	0	0	0	0	0	0	0	0	0	0	0	0	0	0	0	0	0	0	0	0	0	0	0
1101:19350:11149__S_107	Bacteria		Firmicutes	Bacilli	Bacillales	Paenibacillaceae			0	0	0	0	0	0	0	0	0	0	0	0	0	0	0	0	0	0	0	0	0	0	0	0	0	0	0	0	0	0	0	0	0	0	0	0	0	0	5	6	0
1102:24292:21197__R_024	Bacteria		Firmicutes	Bacilli	Bacillales	Paenibacillaceae			0	0	0	0	0	1	3	0	0	0	0	0	0	0	0	0	2	0	0	0	0	0	0	28	0	0	0	0	0	0	0	0	0	3	0	0	0	0	0	0	1
2104:3594:17934__R_040	Bacteria		Firmicutes	Bacilli	Bacillales	Paenibacillaceae			0	0	0	0	0	0	0	0	0	0	0	0	0	2	0	0	0	0	0	0	4	0	0	0	0	0	2	0	0	0	0	0	0	0	0	1	0	0	0	78	0
1101:10701:15135__R_042	Bacteria		Firmicutes	Bacilli	Bacillales	Pasteuriaceae	Pasteuria	uncultured Pasteuria sp.	0	0	3	0	0	0	0	0	0	0	0	0	0	0	2	0	0	0	0	1	0	0	0	0	0	0	0	0	0	0	0	0	0	0	0	0	0	0	0	0	3
1101:13616:2375__S_062	Bacteria		Firmicutes	Bacilli	Bacillales	Pasteuriaceae	Pasteuria	uncultured Pasteuria sp.	0	0	0	0	0	0	0	0	0	0	0	0	0	0	0	0	0	0	0	0	0	0	0	0	0	2	0	0	0	0	0	0	0	0	0	0	0	0	0	0	9
1101:20508:26729__S_042	Bacteria		Firmicutes	Bacilli	Bacillales	Pasteuriaceae	Pasteuria	uncultured Pasteuria sp.	0	0	0	0	0	0	0	0	0	0	0	0	0	0	0	0	0	0	0	0	0	0	0	0	0	0	0	0	0	0	0	0	0	0	0	0	0	0	0	0	0
1103:14547:3977__S_051	Bacteria		Firmicutes	Bacilli	Bacillales	Pasteuriaceae	Pasteuria	uncultured Pasteuria sp.	0	0	0	0	0	0	0	0	0	0	0	0	0	0	0	0	0	0	0	0	0	0	0	0	0	0	0	0	0	0	0	0	0	0	0	0	0	0	0	0	0
2103:7272:12394__S_005	Bacteria		Firmicutes	Bacilli	Bacillales	Pasteuriaceae	Pasteuria	uncultured Pasteuria sp.	0	0	4	0	0	0	0	0	0	0	0	0	0	0	0	0	0	0	0	0	0	0	0	0	0	0	0	0	0	0	0	0	0	0	0	0	0	0	0	0	0
1101:25029:25662__R_003	Bacteria		Firmicutes	Bacilli	Bacillales	Pasteuriaceae	Pasteuria		0	0	47	20	3	0	0	0	0	0	0	0	0	0	0	0	0	0	0	0	0	0	0	0	0	0	0	0	0	0	0	0	0	0	0	0	0	0	0	0	10
1103:7463:16007__R_043	Bacteria		Firmicutes	Bacilli	Bacillales	Thermoactinomycetaceae	Planifilum		0	0	0	0	0	0	0	0	0	0	0	0	0	0	0	0	0	0	0	0	0	0	0	0	0	0	0	0	0	0	0	0	0	0	0	0	0	0	0	0	0
1101:18965:14966__R_127	Bacteria		Firmicutes	Bacilli	Bacillales	Thermoactinomycetaceae	Shimazuella		0	0	0	0	0	1	0	0	1	0	0	2	0	0	0	0	16	1	0	0	0	0	1	0	0	4	0	1	1	4	0	0	0	4	0	3	0	0	0	0	2
1101:17822:15773__R_103	Bacteria		Firmicutes	Bacilli	Bacillales	Thermoactinomycetaceae	Thermoactinomyces		0	0	4	0	0	0	0	0	0	0	0	0	4	0	0	0	0	0	0	0	0	0	8	0	0	0	0	0	0	0	0	0	0	0	0	0	0	0	0	0	0
1101:19703:19784__R_091	Bacteria		Firmicutes	Bacilli	Bacillales	Thermoactinomycetaceae			0	0	0	0	0	0	0	0	0	0	0	0	0	0	0	0	0	0	0	0	0	0	0	0	0	0	0	0	0	0	0	0	0	0	0	0	0	3	0	0	0
1101:24606:8223__S_049	Bacteria		Firmicutes	Bacilli	Bacillales	Thermoactinomycetaceae			0	0	0	0	0	0	0	0	0	0	0	0	0	0	0	0	0	0	0	0	0	0	0	0	0	0	0	0	0	0	0	0	0	0	0	0	0	0	0	0	0
1101:21594:11626__R_075	Bacteria		Firmicutes	Bacilli	Bacillales	Thermoactinomycetaceae			0	0	0	1	0	0	0	5	0	0	0	0	0	0	0	0	0	0	0	0	0	0	0	0	0	0	0	0	0	0	0	0	0	0	0	0	0	0	0	0	0
1101:5161:17364__R_064	Bacteria		Firmicutes	Bacilli	Bacillales	Thermoactinomycetaceae			0	0	0	0	0	0	0	0	0	0	0	0	0	0	0	0	0	0	0	0	0	0	0	0	0	0	0	0	0	0	0	0	0	0	0	0	0	0	0	0	0
1103:22415:18710__R_106	Bacteria		Firmicutes	Bacilli	Bacillales	Thermoactinomycetaceae			0	0	0	0	0	0	0	1	0	0	0	0	0	0	0	0	0	0	0	0	0	0	0	0	0	0	0	0	0	0	0	0	0	0	0	0	0	0	0	0	0
1104:12993:6293__S_057	Bacteria		Firmicutes	Bacilli	Bacillales	Thermoactinomycetaceae			0	0	0	0	0	0	0	0	0	0	0	0	0	0	0	0	0	0	0	0	0	0	0	0	0	0	0	0	0	0	0	0	0	0	0	0	0	0	0	0	0
2101:19747:13626__S_042	Bacteria		Firmicutes	Bacilli	Bacillales	Thermoactinomycetaceae			0	1	0	0	0	0	0	0	0	0	0	0	0	0	0	0	0	0	0	0	0	0	1	0	0	0	0	0	0	0	0	0	0	0	0	0	0	0	0	0	2
2103:22055:12910__S_057	Bacteria		Firmicutes	Bacilli	Bacillales	Thermoactinomycetaceae			0	0	0	0	0	0	0	0	0	0	0	0	0	0	0	0	0	0	1	0	0	0	0	0	0	0	0	0	0	0	0	0	0	0	0	0	0	0	0	0	0
1101:15713:18490__R_072	Bacteria		Firmicutes	Bacilli	Bacillales		Exiguobacterium		0	0	0	0	0	1	0	0	0	0	0	0	0	0	0	0	0	0	0	0	0	0	0	0	0	0	0	0	0	0	0	0	0	0	0	0	0	0	0	0	2
1101:14475:6706__R_003	Bacteria		Firmicutes	Bacilli	Bacillales				2	0	3	0	0	0	0	0	0	0	0	0	0	0	0	0	0	0	0	0	0	0	0	0	0	0	0	0	0	0	0	1	0	0	0	0	0	0	0	0	0
1101:14554:11787__S_057	Bacteria		Firmicutes	Bacilli	Bacillales				1	0	0	0	0	0	0	0	0	0	0	0	0	0	0	0	0	0	0	0	0	0	0	0	0	0	0	0	0	0	0	0	0	0	0	0	0	0	0	0	0
1101:16844:26815__S_061	Bacteria		Firmicutes	Bacilli	Bacillales				0	0	0	0	0	0	0	1	2	0	0	0	0	0	0	0	0	0	0	0	0	0	0	0	0	6	0	0	0	0	0	0	0	0	0	0	0	0	0	0	1
1101:17834:26532__R_113	Bacteria		Firmicutes	Bacilli	Bacillales				0	0	0	3	0	1	0	5	0	0	0	0	0	0	17	0	0	0	0	0	0	0	0	0	0	1	0	0	0	0	0	0	0	0	0	2	0	0	0	0	0
1101:18955:1712__R_015	Bacteria		Firmicutes	Bacilli	Bacillales				0	0	0	0	0	0	0	0	0	0	0	0	1	1	28	0	0	0	0	0	1	0	0	0	0	0	3	0	0	0	0	0	0	0	0	3	0	0	0	10	0
1101:28800:13517__R_015	Bacteria		Firmicutes	Bacilli	Bacillales				0	0	0	0	0	0	0	0	0	0	0	0	0	0	4	0	0	0	0	0	0	0	0	0	0	0	0	0	0	0	0	0	0	0	0	0	0	0	0	0	0
1101:3640:19146__S_006	Bacteria		Firmicutes	Bacilli	Bacillales				0	0	0	0	0	0	0	0	0	0	0	0	0	0	0	0	0	0	0	0	0	0	0	0	0	0	0	0	0	0	0	0	0	0	0	0	0	0	0	0	0
1101:5846:12075__S_121	Bacteria		Firmicutes	Bacilli	Bacillales				0	0	0	0	0	0	0	0	0	0	0	0	0	0	0	0	0	0	0	0	0	0	0	0	0	0	0	0	0	0	0	0	0	0	0	0	0	0	0	0	0
1101:8820:4013__S_072	Bacteria		Firmicutes	Bacilli	Bacillales				0	0	5	0	0	0	0	0	0	0	0	0	0	0	0	0	0	0	0	0	0	0	0	0	0	0	0	0	0	0	0	0	0	0	0	0	0	0	0	0	0
1102:12508:4420__R_016	Bacteria		Firmicutes	Bacilli	Bacillales				70	4	31	23	19	11	2	1	1	0	1	2	5	8	11	17	6	0	5	5	0	1	2	0	4	15	2	1	0	1	0	15	5	0	0	1	0	4	0	1	3
1102:13387:25903__R_009	Bacteria		Firmicutes	Bacilli	Bacillales				0	0	0	0	0	0	0	0	10	1	0	1	0	0	0	1	0	1	0	0	0	0	0	0	0	0	0	0	0	0	0	0	0	0	0	0	0	1	0	0	0
1102:14693:7074__S_102	Bacteria		Firmicutes	Bacilli	Bacillales				0	0	0	0	0	0	0	0	0	0	0	0	0	0	0	0	0	0	0	0	0	0	0	0	0	0	0	0	0	0	0	0	0	0	0	0	0	0	0	0	0
1102:15433:22992__S_115	Bacteria		Firmicutes	Bacilli	Bacillales				0	0	0	0	0	0	0	0	0	0	0	0	0	0	0	0	0	0	0	0	0	0	0	0	0	0	0	0	0	0	0	0	0	0	0	0	0	0	0	0	0
1102:16598:18428__S_086	Bacteria		Firmicutes	Bacilli	Bacillales				0	0	0	0	0	0	0	0	0	0	0	0	0	0	0	0	0	0	0	0	0	0	0	0	0	0	0	0	0	0	0	0	0	0	0	0	0	0	0	0	0
1102:16734:21166__S_006	Bacteria		Firmicutes	Bacilli	Bacillales				0	0	0	0	0	0	0	0	0	0	0	0	0	0	0	0	0	0	0	0	0	0	0	0	0	0	0	0	0	0	0	0	0	0	0	0	0	0	0	0	0
1102:20554:10035__R_114	Bacteria		Firmicutes	Bacilli	Bacillales				0	0	0	0	0	0	5	0	0	0	0	0	0	0	0	0	0	0	0	0	0	0	0	0	0	0	0	0	0	0	0	0	0	0	0	0	0	0	0	0	0
1102:23298:11461__S_130	Bacteria		Firmicutes	Bacilli	Bacillales				0	0	0	0	0	0	0	0	0	0	0	0	0	0	0	0	0	0	0	0	0	0	0	0	0	0	0	0	0	0	0	0	0	0	0	0	0	0	0	0	0
1102:24853:8648__R_025	Bacteria		Firmicutes	Bacilli	Bacillales				1	0	0	0	0	0	0	0	0	0	0	0	2	0	0	0	0	0	0	0	0	0	0	0	2	0	0	1	0	0	0	0	0	0	0	0	0	0	0	0	2
1102:5903:15757__S_109	Bacteria		Firmicutes	Bacilli	Bacillales				0	0	0	0	0	0	0	0	0	0	0	0	0	0	0	0	0	0	0	0	0	0	0	0	0	0	0	0	0	0	0	0	0	0	0	0	0	0	0	0	0
1101:12980:22489__R_015	Bacteria		Firmicutes	Bacilli	Bacillales				0	0	0	0	0	0	1	0	0	0	0	0	0	0	6	0	0	0	0	0	0	0	0	0	0	0	0	0	0	0	0	0	0	0	0	0	0	0	0	0	0
1101:14164:18163__R_016	Bacteria		Firmicutes	Bacilli	Bacillales				0	0	0	0	0	0	0	0	0	0	0	0	0	0	0	36	0	0	0	0	0	0	0	0	0	0	0	0	0	0	0	0	0	0	0	0	0	0	0	0	0
1101:19389:17479__R_089	Bacteria		Firmicutes	Bacilli	Bacillales				0	0	0	0	0	0	0	0	0	0	0	0	0	0	0	0	0	0	0	0	0	0	0	0	0	0	0	0	0	0	0	0	0	0	0	0	0	0	0	0	0
1101:19943:3430__S_086	Bacteria		Firmicutes	Bacilli	Bacillales				0	0	0	0	0	0	0	0	0	0	0	0	0	0	0	0	0	0	0	0	0	0	0	0	0	0	0	0	0	0	0	0	0	0	13	0	0	0	0	0	0
1101:8422:9609__S_070	Bacteria		Firmicutes	Bacilli	Bacillales				1	0	0	0	0	0	0	0	0	0	0	0	0	0	0	0	0	0	0	0	0	0	1	0	0	0	0	0	0	0	0	1	0	0	0	0	0	0	0	0	0
1102:11278:4616__S_053	Bacteria		Firmicutes	Bacilli	Bacillales				0	0	0	0	0	0	0	0	0	0	0	0	0	0	0	0	2	0	0	0	0	0	0	0	0	0	0	0	0	0	0	0	0	0	0	0	0	0	0	0	0
1102:7041:8565__R_065	Bacteria		Firmicutes	Bacilli	Bacillales				0	0	0	0	11	0	0	0	0	0	0	0	0	0	0	0	0	0	0	0	0	0	0	0	0	0	0	0	0	1	0	0	0	0	0	0	0	0	0	0	0
1102:8517:6779__R_090	Bacteria		Firmicutes	Bacilli	Bacillales				0	0	0	3	0	0	0	0	0	0	0	0	0	0	2	0	0	2	0	0	12	0	0	0	0	0	0	0	0	1	0	0	2	0	0	0	0	0	0	0	0
1103:18939:8655__S_066	Bacteria		Firmicutes	Bacilli	Bacillales				0	0	0	0	0	3	0	0	0	0	0	0	0	0	6	6	0	0	0	0	0	0	1	0	0	0	0	0	0	0	0	0	0	0	0	0	0	0	0	0	0
1103:20717:15643__S_095	Bacteria		Firmicutes	Bacilli	Bacillales				3	0	0	0	0	0	0	0	0	0	0	0	0	0	0	0	0	0	0	0	0	0	0	0	0	1	0	0	0	0	0	0	0	0	0	2	0	0	0	4	0
1103:20992:7849__S_018	Bacteria		Firmicutes	Bacilli	Bacillales				0	0	0	0	0	0	0	0	0	0	0	0	0	0	0	0	0	0	0	0	0	0	0	0	0	0	0	0	0	0	0	0	0	0	0	0	0	0	0	0	0
1103:24547:17697__R_121	Bacteria		Firmicutes	Bacilli	Bacillales				0	0	0	0	0	0	0	0	0	0	0	0	0	0	0	0	0	0	0	0	0	0	0	0	0	0	0	0	0	0	0	0	0	0	0	0	0	0	0	0	0
1103:26740:22945__R_079	Bacteria		Firmicutes	Bacilli	Bacillales				0	1	0	0	2	0	0	0	0	0	0	0	0	0	0	0	0	0	0	0	0	0	0	0	0	0	0	0	0	0	0	0	0	0	0	0	0	0	0	0	0
1103:3764:13593__S_058	Bacteria		Firmicutes	Bacilli	Bacillales				0	0	0	1	0	1	0	0	0	0	0	0	0	0	8	0	0	0	0	0	0	0	0	0	1	0	0	0	0	0	0	0	1	0	0	0	0	0	0	0	0
1103:8481:8860__R_015	Bacteria		Firmicutes	Bacilli	Bacillales				0	0	0	0	0	0	0	0	0	0	0	0	0	0	7	0	0	0	0	0	0	0	0	0	0	0	0	0	0	0	0	0	0	0	0	0	0	0	0	0	0
1104:13678:2059__S_085	Bacteria		Firmicutes	Bacilli	Bacillales				0	0	0	0	0	0	0	0	0	0	0	0	0	0	0	0	0	0	0	0	0	0	0	0	0	0	0	0	0	0	0	0	0	0	0	0	0	0	0	0	0
1104:20655:13799__R_072	Bacteria		Firmicutes	Bacilli	Bacillales				0	0	0	0	0	0	0	0	0	0	0	0	0	0	0	0	0	0	0	0	0	0	0	0	0	0	0	0	0	0	0	0	0	1	0	0	0	0	0	1	0
1104:4092:8188__S_102	Bacteria		Firmicutes	Bacilli	Bacillales				0	0	0	0	0	0	0	0	0	0	0	0	0	0	0	0	0	0	0	0	0	0	0	0	0	0	0	0	0	0	0	0	0	0	0	0	0	0	0	0	0
2101:8544:19901__S_015	Bacteria		Firmicutes	Bacilli	Bacillales				0	0	0	0	0	0	0	0	0	0	0	0	0	0	0	0	0	0	0	0	0	0	0	0	0	0	0	0	0	0	0	0	0	0	0	0	0	0	0	0	0
2101:9595:11410__S_036	Bacteria		Firmicutes	Bacilli	Bacillales				0	0	0	0	0	0	0	0	0	0	0	0	0	0	0	0	0	0	0	0	0	0	0	0	0	0	0	0	0	0	0	0	0	0	0	0	0	0	0	0	0
2102:12517:3899__S_111	Bacteria		Firmicutes	Bacilli	Bacillales				0	0	0	0	1	0	0	0	0	0	0	0	0	0	0	0	0	0	0	0	0	0	0	0	0	0	0	0	0	0	0	0	0	0	0	0	0	0	0	0	1
2102:17146:17472__S_072	Bacteria		Firmicutes	Bacilli	Bacillales				0	0	0	0	0	0	0	0	0	0	0	0	0	0	0	0	0	0	0	0	0	0	0	0	0	0	0	0	0	0	0	0	0	0	0	0	0	0	0	0	0
1102:5173:11243__S_089	Bacteria		Firmicutes	Bacilli	Lactobacillales	Carnobacteriaceae	Carnobacterium	uncultured Carnobacterium sp.	0	0	0	0	0	0	0	0	0	0	0	0	0	0	0	0	0	0	0	0	0	0	0	0	0	0	0	0	0	0	0	0	0	0	0	0	0	0	0	0	0
1101:14750:23265__R_055	Bacteria		Firmicutes	Bacilli					9	0	1	17	0	3	0	6	0	1	2	0	2	0	4	0	16	5	0	0	2	5	2	0	2	0	3	0	0	5	0	7	5	4	13	11	0	5	0	2	3
1101:19066:17549__S_097	Bacteria		Firmicutes	Bacilli					0	0	0	0	0	0	0	0	0	0	0	0	0	0	0	0	0	0	0	0	0	0	0	0	0	0	0	0	0	0	0	0	0	0	0	0	0	0	0	0	0
1101:28533:14154__R_043	Bacteria		Firmicutes	Bacilli					0	6	2	0	6	1	0	5	0	5	5	2	4	10	4	0	2	5	0	0	0	3	0	0	22	0	0	0	0	3	0	2	8	0	0	21	0	16	0	0	0
1102:15368:14382__S_052	Bacteria		Firmicutes	Bacilli					0	0	0	0	0	0	0	0	0	0	0	0	0	0	0	0	0	0	0	0	0	0	0	0	0	0	0	0	0	0	0	0	0	0	0	0	0	0	0	0	0
1102:14937:23407__S_016	Bacteria		Firmicutes	Bacilli					0	0	3	0	0	0	0	0	0	0	0	0	0	0	0	0	0	0	0	0	0	0	0	0	1	0	0	0	0	0	0	0	0	0	0	0	0	0	0	0	0
1103:11929:12900__R_128	Bacteria		Firmicutes	Bacilli					0	0	0	2	4	1	2	0	6	2	1	0	1	5	10	0	9	0	0	0	0	0	2	40	0	0	0	0	0	0	0	0	4	2	0	0	0	0	0	0	3
1103:15404:25635__R_033	Bacteria		Firmicutes	Bacilli					0	0	2	1	0	1	0	2	1	6	1	1	0	2	1	0	1	3	0	0	0	0	0	0	0	10	3	0	1	0	0	0	18	5	0	0	0	0	0	0	6
1101:15152:4700__S_044	Bacteria		Firmicutes	Clostridia	Clostridiales	Clostridiaceae	Clostridium	uncultured Clostridium sp.	0	0	0	0	0	0	0	0	0	0	0	0	0	0	0	0	0	0	0	0	0	0	0	0	0	0	0	0	0	0	0	0	0	0	0	0	0	0	0	0	0
1102:18168:21229__S_096	Bacteria		Firmicutes	Clostridia	Clostridiales	Clostridiaceae	Clostridium	uncultured Clostridium sp.	0	0	0	0	0	0	0	0	0	0	0	0	0	0	0	0	0	0	0	0	0	0	0	0	0	0	0	0	0	2	0	0	0	0	0	0	0	0	0	0	0
1101:7460:21777__S_125	Bacteria		Firmicutes	Clostridia	Clostridiales	Clostridiaceae	Clostridium		0	0	0	0	0	0	0	0	0	0	0	0	0	0	0	0	0	0	0	0	0	0	0	0	0	0	0	0	0	0	0	0	0	0	0	0	0	0	0	0	0
1102:10138:20118__S_032	Bacteria		Firmicutes	Clostridia	Clostridiales	Clostridiaceae	Clostridium		0	0	0	0	0	0	0	0	0	0	0	0	0	0	0	0	0	0	0	0	0	0	0	0	0	0	0	0	0	0	0	0	0	0	0	0	0	0	0	0	0
1102:13833:5897__R_090	Bacteria		Firmicutes	Clostridia	Clostridiales	Clostridiaceae	Clostridium		0	0	0	0	0	0	0	0	0	0	0	0	0	0	0	0	0	0	0	0	0	0	0	0	0	0	0	0	0	0	0	0	0	0	0	0	0	0	0	0	0
1102:27018:7495__R_125	Bacteria		Firmicutes	Clostridia	Clostridiales	Clostridiaceae	Clostridium		0	0	0	1	0	0	0	0	0	0	0	0	0	0	0	0	0	0	0	0	0	0	0	0	0	0	0	0	0	0	0	0	0	0	0	0	0	0	0	0	0
1101:3794:22050__S_094	Bacteria		Firmicutes	Clostridia	Clostridiales	Clostridiaceae	Clostridium		0	0	0	0	0	0	0	0	0	0	0	0	0	0	0	0	0	0	0	0	0	0	0	0	0	0	0	0	0	0	0	0	0	0	0	0	0	0	0	0	0
1101:7327:9533__S_051	Bacteria		Firmicutes	Clostridia	Clostridiales	Clostridiaceae	Clostridium		0	0	0	0	0	0	0	0	0	0	0	0	0	0	0	0	0	0	0	0	0	0	0	0	0	0	0	0	0	0	0	0	0	0	0	0	0	0	0	0	0
1102:27463:19353__R_125	Bacteria		Firmicutes	Clostridia	Clostridiales	Clostridiaceae	Clostridium		0	0	0	0	0	0	0	6	0	0	1	0	0	0	0	0	0	0	0	0	0	0	0	0	0	0	0	0	0	0	0	0	0	0	0	15	0	9	0	0	5
1102:9542:19154__S_017	Bacteria		Firmicutes	Clostridia	Clostridiales	Clostridiaceae	Clostridium		0	0	0	0	0	0	0	0	0	0	0	0	0	0	0	0	0	0	0	0	0	0	0	0	0	0	0	0	0	0	0	0	0	0	0	0	0	0	0	0	0
2101:18786:12158__S_020	Bacteria		Firmicutes	Clostridia	Clostridiales	Clostridiaceae	Clostridium		0	0	0	0	0	0	0	0	0	0	0	0	0	0	0	0	0	0	0	0	0	0	0	0	0	0	0	0	0	0	0	0	0	0	0	0	0	0	0	0	0
2104:16723:8430__S_002	Bacteria		Firmicutes	Clostridia	Clostridiales	Clostridiaceae	Clostridium		0	0	0	0	0	0	0	0	0	0	0	0	0	0	0	0	0	0	0	0	0	0	0	0	0	0	0	0	0	0	0	0	0	0	0	0	0	0	0	0	0
1102:6781:24875__S_064	Bacteria		Firmicutes	Clostridia	Clostridiales	Clostridiaceae			0	0	0	0	0	0	0	0	0	0	0	0	0	0	0	0	0	0	0	0	0	0	0	0	0	0	0	0	0	0	0	0	0	0	0	0	0	0	0	0	0
1101:10826:12903__S_024	Bacteria		Firmicutes	Clostridia	Clostridiales	Clostridiales Family XVII. Incertae Sedis	Thermaerobacter		0	0	0	0	0	0	0	0	0	0	0	0	0	0	0	0	0	0	0	0	0	0	0	0	0	1	0	0	0	0	0	0	0	0	0	0	0	0	0	0	0
1101:11870:17681__S_010	Bacteria		Firmicutes	Clostridia	Clostridiales	Lachnospiraceae	Herbinix		0	0	0	0	0	0	0	0	0	0	0	0	0	0	0	0	0	0	0	0	0	0	0	0	0	0	0	0	0	0	0	0	0	0	0	0	0	0	0	0	0
1101:18943:20090__R_009	Bacteria		Firmicutes	Clostridia	Clostridiales	Symbiobacteriaceae	Symbiobacterium		0	0	0	0	0	0	0	0	6	0	0	0	0	0	0	0	0	0	0	0	0	0	0	0	0	0	0	0	0	0	0	0	0	0	0	0	0	0	0	0	0
1101:14349:17919__S_062	Bacteria		Firmicutes	Clostridia	Clostridiales				0	0	0	0	0	0	0	0	0	0	0	0	0	0	0	0	0	0	0	0	0	0	0	0	0	0	0	0	0	0	0	0	0	0	0	0	0	0	0	0	0
1101:15111:23676__S_110	Bacteria		Firmicutes	Clostridia	Clostridiales				0	0	0	0	0	0	0	0	0	0	0	0	0	0	0	0	0	0	0	0	0	0	0	0	0	0	0	0	0	0	0	0	0	0	0	0	0	0	0	0	0
1101:17338:19332__R_026	Bacteria		Firmicutes	Clostridia	Clostridiales				0	0	0	0	0	0	0	0	0	0	0	0	0	0	0	0	0	0	0	0	0	0	0	0	0	7	0	0	0	0	0	0	0	0	0	0	0	0	0	0	4
1102:11763:16274__R_118	Bacteria		Firmicutes	Clostridia	Clostridiales				0	0	0	0	0	0	0	0	0	0	0	0	0	0	0	0	0	0	0	0	0	0	1	0	0	0	0	0	0	0	0	0	0	1	0	0	0	0	0	0	0
1102:14654:25340__R_011	Bacteria		Firmicutes	Clostridia	Clostridiales				0	0	0	0	0	0	0	0	0	0	3	0	0	0	0	0	0	0	0	0	0	0	0	0	0	0	0	0	0	0	0	0	0	0	0	0	0	0	0	0	0
1101:11303:27119__R_004	Bacteria		Firmicutes	Clostridia	Clostridiales				0	0	0	4	0	0	0	0	0	0	0	0	0	0	0	0	0	0	0	0	0	0	0	0	0	0	0	0	0	0	0	0	0	0	0	0	0	0	0	0	0
1102:22362:10612__S_092	Bacteria		Firmicutes	Clostridia	Halanaerobiales	Halanaerobiaceae	Halocella	uncultured Halocella sp.	0	0	0	0	0	0	0	0	0	0	0	0	0	0	0	0	0	0	0	0	0	0	0	0	0	0	0	0	0	0	0	0	0	0	0	0	0	0	0	0	0
1101:17723:12595__S_015	Bacteria		Firmicutes	Negativicutes	Selenomonadales	Sporomusaceae			0	0	0	0	0	0	0	0	0	0	0	0	0	0	0	0	0	0	0	0	0	0	0	0	0	0	0	0	0	0	0	0	0	0	0	0	0	0	0	0	0
1101:10609:16531__S_112	Bacteria		Firmicutes						0	0	0	0	0	0	0	0	0	0	0	0	0	0	0	0	0	0	0	0	0	0	0	0	0	0	0	0	0	0	0	0	0	0	0	0	0	0	0	0	0
1101:10947:26329__R_095	Bacteria		Firmicutes						0	0	0	0	0	0	0	0	0	0	0	0	0	0	0	0	0	0	0	0	0	0	0	0	0	0	0	0	0	0	0	0	0	0	0	0	0	0	0	0	0
1101:11262:13078__S_130	Bacteria		Firmicutes						0	0	0	0	0	0	0	0	0	0	0	0	0	0	0	0	0	0	0	0	0	0	0	0	0	0	0	0	0	0	0	0	0	0	0	0	0	0	0	0	0
1101:20511:24781__S_085	Bacteria		Firmicutes						0	0	0	0	0	0	0	0	0	0	0	0	0	0	0	0	0	0	0	0	0	0	0	0	0	0	0	0	0	0	0	0	0	0	0	0	0	0	0	0	0
1101:20769:18232__R_027	Bacteria		Firmicutes						0	0	0	0	0	0	0	0	0	0	0	0	0	0	0	0	0	0	0	0	0	0	0	0	0	0	5	0	0	0	0	0	0	0	0	0	0	0	0	0	0
1101:25732:22312__S_012	Bacteria		Firmicutes						0	0	0	0	0	0	0	0	0	0	0	0	0	0	0	0	0	0	0	0	0	0	0	0	0	0	0	0	0	0	0	0	0	0	0	0	0	0	0	0	0
1102:12983:7275__S_082	Bacteria		Firmicutes						0	0	0	0	0	0	0	0	0	0	0	0	0	0	0	0	0	0	0	0	0	0	0	0	0	0	0	0	0	0	0	0	0	0	0	0	0	0	0	0	0
1102:15512:18001__S_098	Bacteria		Firmicutes						0	0	0	0	0	0	0	0	0	0	0	0	0	0	0	0	0	0	0	0	0	0	0	0	0	0	0	0	0	0	0	0	0	0	0	0	0	0	0	0	0
1102:17524:26978__S_061	Bacteria		Firmicutes						0	0	0	0	0	0	0	0	0	0	0	0	0	0	0	0	0	0	0	0	0	0	0	0	0	0	0	0	0	0	0	0	0	0	0	0	0	0	0	0	0
1101:13602:22850__R_023	Bacteria		Firmicutes						0	0	0	0	0	0	0	0	0	0	0	0	0	0	0	0	0	0	0	0	0	0	4	0	0	0	0	0	0	0	0	0	0	0	0	0	0	0	0	0	0
1101:19020:16542__S_087	Bacteria		Firmicutes						0	0	0	0	0	0	0	0	0	0	0	0	0	0	0	0	0	0	0	0	0	0	0	0	0	0	0	0	0	0	0	0	0	0	0	0	0	0	0	0	0
1101:21224:7851__S_022	Bacteria		Firmicutes						0	0	0	0	0	0	0	0	0	0	0	0	0	0	0	0	0	0	0	0	0	0	0	0	0	0	0	0	0	0	0	0	0	0	0	0	0	0	0	0	0
1101:5380:12875__S_104	Bacteria		Firmicutes						0	0	0	0	0	0	0	0	0	0	0	0	0	0	0	0	0	0	0	0	0	0	0	0	0	0	0	0	0	0	0	0	0	0	0	0	0	0	0	0	0
1101:9844:10583__S_093	Bacteria		Firmicutes						0	0	0	0	0	0	0	0	0	0	0	0	0	0	0	0	0	0	0	0	0	0	0	0	0	0	0	0	0	0	0	0	0	0	0	0	0	0	0	0	0
1102:10197:5248__S_077	Bacteria		Firmicutes						0	0	0	0	0	0	0	0	0	0	0	0	0	0	0	0	0	0	0	0	0	0	0	0	0	0	0	0	0	0	0	0	0	0	0	0	0	0	0	0	0
1102:20879:20162__S_094	Bacteria		Firmicutes						0	0	0	0	0	0	0	0	0	0	0	0	0	0	0	0	0	0	0	0	0	0	0	0	0	0	0	0	0	0	0	0	0	0	0	0	0	0	0	0	0
1103:12905:11452__R_063	Bacteria		Firmicutes						0	0	5	0	0	0	0	0	1	1	0	0	0	1	6	0	0	0	0	0	0	0	0	0	0	0	0	0	0	0	0	0	0	0	0	1	0	0	0	0	0
1103:3952:20071__R_112	Bacteria		Firmicutes						0	0	0	18	0	1	0	0	0	0	0	0	0	2	10	0	0	0	0	0	0	0	0	0	0	0	0	0	1	0	0	0	22	0	0	31	0	1	0	13	0
1104:5129:8872__R_038	Bacteria		Firmicutes						0	0	0	0	0	0	0	0	0	0	0	0	0	1	3	0	0	0	0	0	0	0	0	0	0	0	0	0	0	0	0	0	0	0	0	0	0	5	0	0	0
2101:11910:6895__S_104	Bacteria		Firmicutes						0	0	0	0	0	0	0	0	0	0	1	0	0	0	0	0	0	0	0	0	0	0	0	0	0	0	0	0	0	0	0	0	0	0	0	0	0	0	0	0	0
2102:19111:18016__S_086	Bacteria		Firmicutes						0	0	0	0	0	0	0	0	0	0	0	0	0	0	0	0	0	0	0	0	0	0	0	0	0	0	0	0	0	0	0	0	0	0	0	0	0	0	0	0	0
2103:7866:5467__R_048	Bacteria		Firmicutes						0	0	0	0	0	0	0	0	0	0	0	0	0	0	0	0	0	0	0	0	0	0	0	0	0	0	0	0	0	0	0	0	0	0	0	0	0	0	0	0	0
2104:10371:15444__S_085	Bacteria		Firmicutes						0	0	0	0	0	0	0	0	0	0	0	0	0	0	0	0	0	0	0	0	0	0	0	0	0	0	0	0	0	0	0	0	0	0	0	0	0	0	0	0	0
2104:2967:19673__S_008	Bacteria		Firmicutes						0	0	1	0	0	0	0	0	0	0	0	0	0	0	0	0	0	0	0	0	0	0	0	0	0	0	0	0	0	0	0	0	0	0	0	0	0	0	0	0	0
1101:10207:16093__S_024	Bacteria		Gemmatimonadetes	Gemmatimonadetes	Gemmatimonadales	Gemmatimonadaceae	Gemmatimonas	uncultured Gemmatimonas sp.	0	0	0	1	0	0	0	0	0	0	0	0	0	0	0	0	1	0	0	0	0	0	0	0	0	0	4	0	0	0	0	0	0	0	0	0	0	0	0	0	0
1101:10434:19005__S_130	Bacteria		Gemmatimonadetes	Gemmatimonadetes	Gemmatimonadales	Gemmatimonadaceae	Gemmatimonas	uncultured Gemmatimonas sp.	0	0	2	0	0	0	0	0	0	0	0	0	0	0	0	0	0	0	0	0	0	0	0	0	0	0	0	0	0	0	0	0	0	0	0	0	0	0	0	0	0
1101:10759:5295__S_128	Bacteria		Gemmatimonadetes	Gemmatimonadetes	Gemmatimonadales	Gemmatimonadaceae	Gemmatimonas	uncultured Gemmatimonas sp.	0	0	0	0	0	0	0	0	0	0	0	0	0	0	0	0	0	0	0	0	0	0	0	0	0	0	0	0	0	0	0	0	0	0	0	0	0	0	0	0	0
1101:11035:8791__S_077	Bacteria		Gemmatimonadetes	Gemmatimonadetes	Gemmatimonadales	Gemmatimonadaceae	Gemmatimonas	uncultured Gemmatimonas sp.	0	0	0	2	0	0	0	0	0	0	1	0	0	0	0	0	0	0	0	0	0	0	0	0	0	0	0	0	0	0	0	0	0	0	0	0	0	0	0	0	0
1101:11100:24423__S_118	Bacteria		Gemmatimonadetes	Gemmatimonadetes	Gemmatimonadales	Gemmatimonadaceae	Gemmatimonas	uncultured Gemmatimonas sp.	0	1	0	0	0	0	0	0	0	0	0	0	0	0	0	0	0	0	0	0	0	0	0	0	0	0	0	0	0	0	0	0	0	0	0	0	0	0	0	0	0
1101:11629:4479__S_087	Bacteria		Gemmatimonadetes	Gemmatimonadetes	Gemmatimonadales	Gemmatimonadaceae	Gemmatimonas	uncultured Gemmatimonas sp.	0	0	0	0	0	0	0	0	0	0	0	0	0	0	0	0	0	0	0	0	0	0	0	0	0	0	0	0	0	0	0	0	0	0	0	0	0	0	0	0	0
1101:11887:16994__S_121	Bacteria		Gemmatimonadetes	Gemmatimonadetes	Gemmatimonadales	Gemmatimonadaceae	Gemmatimonas	uncultured Gemmatimonas sp.	0	0	0	0	3	4	0	0	0	0	0	0	3	0	0	12	0	0	0	0	0	0	0	0	0	0	0	0	0	0	0	0	0	0	0	0	0	0	0	0	0
1101:11901:21134__S_128	Bacteria		Gemmatimonadetes	Gemmatimonadetes	Gemmatimonadales	Gemmatimonadaceae	Gemmatimonas	uncultured Gemmatimonas sp.	0	0	0	0	0	0	0	0	0	0	0	0	0	0	0	0	0	0	0	0	0	0	0	0	0	0	0	0	0	0	0	0	0	0	0	0	0	0	0	0	0
1101:12117:21960__S_024	Bacteria		Gemmatimonadetes	Gemmatimonadetes	Gemmatimonadales	Gemmatimonadaceae	Gemmatimonas	uncultured Gemmatimonas sp.	0	0	0	0	0	1	0	0	0	0	2	0	0	0	3	0	0	5	0	0	0	2	0	0	0	0	0	0	0	0	0	0	0	0	0	0	0	0	0	2	0
1101:12331:22252__S_011	Bacteria		Gemmatimonadetes	Gemmatimonadetes	Gemmatimonadales	Gemmatimonadaceae	Gemmatimonas	uncultured Gemmatimonas sp.	0	0	0	0	0	0	0	0	0	0	0	0	0	0	0	0	0	0	0	0	0	0	0	0	0	0	0	0	0	1	0	0	0	0	0	0	0	0	0	0	0
1101:12405:19078__S_066	Bacteria		Gemmatimonadetes	Gemmatimonadetes	Gemmatimonadales	Gemmatimonadaceae	Gemmatimonas	uncultured Gemmatimonas sp.	0	0	0	0	0	0	0	0	0	0	0	0	0	0	0	0	0	0	0	0	0	0	0	0	0	0	0	0	0	0	0	0	0	0	0	0	0	0	0	0	0
1101:12662:16514__S_062	Bacteria		Gemmatimonadetes	Gemmatimonadetes	Gemmatimonadales	Gemmatimonadaceae	Gemmatimonas	uncultured Gemmatimonas sp.	0	0	0	0	0	0	0	0	0	0	0	0	0	0	0	0	0	0	0	0	0	0	0	0	6	0	0	0	0	0	0	0	0	0	0	0	0	0	0	7	0
1101:12981:8226__S_089	Bacteria		Gemmatimonadetes	Gemmatimonadetes	Gemmatimonadales	Gemmatimonadaceae	Gemmatimonas	uncultured Gemmatimonas sp.	0	0	0	0	0	0	0	0	0	0	0	0	0	0	0	0	0	0	0	0	0	0	0	0	0	0	0	0	0	0	0	0	0	0	0	0	0	0	0	0	0
1101:13144:25116__S_057	Bacteria		Gemmatimonadetes	Gemmatimonadetes	Gemmatimonadales	Gemmatimonadaceae	Gemmatimonas	uncultured Gemmatimonas sp.	0	0	0	0	0	0	0	0	0	0	0	0	0	0	0	0	0	0	0	0	0	0	0	0	0	0	0	0	0	0	0	0	0	0	0	0	0	0	0	0	0
1101:13474:19044__S_027	Bacteria		Gemmatimonadetes	Gemmatimonadetes	Gemmatimonadales	Gemmatimonadaceae	Gemmatimonas	uncultured Gemmatimonas sp.	0	0	0	0	0	0	0	0	0	0	0	0	0	0	0	0	0	0	0	0	0	0	0	0	0	0	0	0	0	0	0	0	0	0	0	0	0	0	0	0	0
1101:13528:27403__S_030	Bacteria		Gemmatimonadetes	Gemmatimonadetes	Gemmatimonadales	Gemmatimonadaceae	Gemmatimonas	uncultured Gemmatimonas sp.	0	0	0	0	0	0	0	0	0	0	0	0	0	0	0	0	0	0	0	0	0	0	0	0	0	0	0	0	0	0	0	0	0	0	0	0	0	0	0	0	0
1101:13606:4503__S_024	Bacteria		Gemmatimonadetes	Gemmatimonadetes	Gemmatimonadales	Gemmatimonadaceae	Gemmatimonas	uncultured Gemmatimonas sp.	0	0	0	0	0	0	0	0	0	0	0	0	0	0	0	0	0	0	0	0	0	0	0	0	0	0	0	0	0	0	0	0	0	0	0	0	0	2	0	0	0
1101:13712:9299__S_049	Bacteria		Gemmatimonadetes	Gemmatimonadetes	Gemmatimonadales	Gemmatimonadaceae	Gemmatimonas	uncultured Gemmatimonas sp.	0	0	0	0	0	0	0	0	0	0	0	0	0	0	0	0	0	0	0	0	0	0	0	0	0	0	0	0	0	0	0	0	0	0	0	0	0	0	0	0	0
1101:14147:13043__S_052	Bacteria		Gemmatimonadetes	Gemmatimonadetes	Gemmatimonadales	Gemmatimonadaceae	Gemmatimonas	uncultured Gemmatimonas sp.	0	0	0	0	0	0	0	0	0	0	0	0	0	0	0	0	0	0	0	0	0	0	0	0	0	0	0	0	0	0	0	0	0	0	0	0	0	0	0	0	0
1101:14249:16590__S_015	Bacteria		Gemmatimonadetes	Gemmatimonadetes	Gemmatimonadales	Gemmatimonadaceae	Gemmatimonas	uncultured Gemmatimonas sp.	0	0	0	0	0	0	0	0	0	0	0	0	0	0	0	0	0	0	0	0	0	0	0	0	0	0	0	0	0	0	0	0	0	0	0	0	0	0	0	0	0
1101:14933:6642__S_090	Bacteria		Gemmatimonadetes	Gemmatimonadetes	Gemmatimonadales	Gemmatimonadaceae	Gemmatimonas	uncultured Gemmatimonas sp.	0	0	0	0	0	0	0	0	0	0	0	0	0	0	0	0	0	0	0	0	0	0	0	0	0	0	0	0	0	0	0	0	0	0	0	0	0	0	0	0	0
1101:15230:10272__S_027	Bacteria		Gemmatimonadetes	Gemmatimonadetes	Gemmatimonadales	Gemmatimonadaceae	Gemmatimonas	uncultured Gemmatimonas sp.	0	0	0	0	0	0	0	0	0	0	0	0	0	0	0	0	0	0	0	0	0	0	0	0	0	0	0	0	0	0	0	0	0	0	0	0	0	0	0	0	0
1101:15567:22254__S_129	Bacteria		Gemmatimonadetes	Gemmatimonadetes	Gemmatimonadales	Gemmatimonadaceae	Gemmatimonas	uncultured Gemmatimonas sp.	0	0	0	0	0	0	0	0	0	0	0	0	0	0	0	0	0	0	0	0	0	0	0	0	0	0	0	0	0	0	0	0	0	0	0	0	0	0	0	0	0
1101:16338:20032__S_113	Bacteria		Gemmatimonadetes	Gemmatimonadetes	Gemmatimonadales	Gemmatimonadaceae	Gemmatimonas	uncultured Gemmatimonas sp.	0	0	0	0	0	0	0	0	0	0	0	0	0	0	0	0	0	0	0	0	0	0	0	0	0	0	0	0	0	0	0	0	0	0	0	0	0	0	0	0	0
1101:16659:3779__R_057	Bacteria		Gemmatimonadetes	Gemmatimonadetes	Gemmatimonadales	Gemmatimonadaceae	Gemmatimonas	uncultured Gemmatimonas sp.	0	0	0	0	0	0	0	0	0	0	0	0	0	0	0	0	0	0	0	0	0	0	0	0	0	0	0	0	0	0	0	0	0	0	0	0	0	0	0	0	0
1101:16871:25548__S_060	Bacteria		Gemmatimonadetes	Gemmatimonadetes	Gemmatimonadales	Gemmatimonadaceae	Gemmatimonas	uncultured Gemmatimonas sp.	0	0	0	0	0	0	0	0	0	0	0	0	0	0	0	0	0	0	0	0	0	0	0	0	0	0	0	0	0	0	0	0	0	0	0	0	0	0	0	0	0
1101:17168:6935__S_036	Bacteria		Gemmatimonadetes	Gemmatimonadetes	Gemmatimonadales	Gemmatimonadaceae	Gemmatimonas	uncultured Gemmatimonas sp.	0	0	0	0	0	0	0	0	0	0	0	0	0	0	0	0	0	0	0	0	0	0	0	37	0	0	0	0	0	0	0	0	0	0	0	0	0	0	0	0	0
1101:17172:14505__S_041	Bacteria		Gemmatimonadetes	Gemmatimonadetes	Gemmatimonadales	Gemmatimonadaceae	Gemmatimonas	uncultured Gemmatimonas sp.	0	0	0	0	0	0	0	0	0	0	0	0	0	0	0	0	0	0	0	0	0	0	0	0	0	0	0	0	0	0	0	0	0	0	0	0	0	0	0	0	0
1101:18701:9341__S_088	Bacteria		Gemmatimonadetes	Gemmatimonadetes	Gemmatimonadales	Gemmatimonadaceae	Gemmatimonas	uncultured Gemmatimonas sp.	0	0	0	0	0	0	0	0	0	0	0	0	0	0	0	0	0	0	0	0	0	0	0	0	0	0	0	0	0	0	0	0	0	0	0	0	0	0	0	0	0
1101:18818:16555__S_077	Bacteria		Gemmatimonadetes	Gemmatimonadetes	Gemmatimonadales	Gemmatimonadaceae	Gemmatimonas	uncultured Gemmatimonas sp.	0	0	1	0	1	0	0	0	0	0	0	0	0	0	0	0	2	0	0	0	0	0	0	0	0	0	0	0	0	0	0	0	0	0	0	0	0	0	0	0	0
1101:18982:4091__R_027	Bacteria		Gemmatimonadetes	Gemmatimonadetes	Gemmatimonadales	Gemmatimonadaceae	Gemmatimonas	uncultured Gemmatimonas sp.	0	0	0	0	0	0	0	0	0	0	0	0	0	0	0	0	0	0	0	0	0	0	0	0	0	0	7	0	0	0	0	0	0	0	0	0	0	0	0	0	0
1101:20318:10499__S_088	Bacteria		Gemmatimonadetes	Gemmatimonadetes	Gemmatimonadales	Gemmatimonadaceae	Gemmatimonas	uncultured Gemmatimonas sp.	0	0	0	0	0	0	0	0	0	0	0	0	0	0	0	0	0	0	0	0	0	0	0	0	0	0	0	0	0	0	0	0	0	0	0	0	0	0	0	0	0
1101:20982:24545__S_088	Bacteria		Gemmatimonadetes	Gemmatimonadetes	Gemmatimonadales	Gemmatimonadaceae	Gemmatimonas	uncultured Gemmatimonas sp.	0	0	0	0	0	0	0	0	0	0	0	0	0	0	0	0	0	0	0	0	0	0	0	0	0	0	0	0	0	0	0	0	0	0	0	0	0	0	0	0	0
1101:21189:14210__S_011	Bacteria		Gemmatimonadetes	Gemmatimonadetes	Gemmatimonadales	Gemmatimonadaceae	Gemmatimonas	uncultured Gemmatimonas sp.	0	0	0	0	0	0	0	0	0	0	0	0	0	0	0	0	0	0	0	0	0	0	0	0	0	0	0	0	0	0	0	0	0	0	0	0	0	0	0	0	0
1101:21433:23846__S_096	Bacteria		Gemmatimonadetes	Gemmatimonadetes	Gemmatimonadales	Gemmatimonadaceae	Gemmatimonas	uncultured Gemmatimonas sp.	0	0	0	0	0	0	0	0	0	0	0	0	0	0	0	0	0	0	0	0	0	0	0	0	0	0	0	0	0	0	0	0	0	0	0	0	0	0	0	0	0
1101:21999:24479__S_008	Bacteria		Gemmatimonadetes	Gemmatimonadetes	Gemmatimonadales	Gemmatimonadaceae	Gemmatimonas	uncultured Gemmatimonas sp.	0	0	0	0	0	0	0	0	1	0	0	0	0	0	0	0	0	0	0	0	0	0	0	0	0	0	0	0	0	0	0	0	0	0	0	0	0	0	0	0	0
1101:22883:25457__S_030	Bacteria		Gemmatimonadetes	Gemmatimonadetes	Gemmatimonadales	Gemmatimonadaceae	Gemmatimonas	uncultured Gemmatimonas sp.	0	0	0	0	0	0	0	0	0	0	0	0	0	0	0	0	0	0	0	0	0	0	0	0	0	0	0	0	0	0	0	0	0	0	0	0	0	0	0	0	0
1101:22912:8229__S_012	Bacteria		Gemmatimonadetes	Gemmatimonadetes	Gemmatimonadales	Gemmatimonadaceae	Gemmatimonas	uncultured Gemmatimonas sp.	0	0	0	0	1	0	4	0	0	0	0	0	2	0	0	0	0	0	0	0	0	0	0	0	0	0	0	0	0	0	0	0	0	0	0	0	0	0	0	0	0
1101:25586:16006__S_059	Bacteria		Gemmatimonadetes	Gemmatimonadetes	Gemmatimonadales	Gemmatimonadaceae	Gemmatimonas	uncultured Gemmatimonas sp.	0	0	0	0	0	0	0	0	0	0	0	0	0	0	0	0	0	0	0	0	0	0	0	0	0	0	0	0	0	0	0	0	0	0	0	0	0	0	0	0	0
1101:26402:8413__S_077	Bacteria		Gemmatimonadetes	Gemmatimonadetes	Gemmatimonadales	Gemmatimonadaceae	Gemmatimonas	uncultured Gemmatimonas sp.	0	0	0	0	0	0	0	0	0	0	0	0	0	0	0	0	0	0	0	0	0	0	0	0	0	0	0	0	0	0	0	0	0	0	0	0	0	0	0	0	0
1101:28119:12365__S_008	Bacteria		Gemmatimonadetes	Gemmatimonadetes	Gemmatimonadales	Gemmatimonadaceae	Gemmatimonas	uncultured Gemmatimonas sp.	0	0	0	0	0	0	0	0	0	0	0	0	0	0	0	0	0	0	0	0	0	0	0	0	0	0	0	0	0	0	0	0	0	0	0	0	0	0	0	0	0
1101:28753:15241__S_014	Bacteria		Gemmatimonadetes	Gemmatimonadetes	Gemmatimonadales	Gemmatimonadaceae	Gemmatimonas	uncultured Gemmatimonas sp.	0	0	0	0	0	0	0	0	0	0	0	0	0	0	0	0	0	0	0	0	0	0	0	0	0	0	0	0	0	0	0	0	0	0	0	0	0	0	0	0	0
1101:3379:12138__S_027	Bacteria		Gemmatimonadetes	Gemmatimonadetes	Gemmatimonadales	Gemmatimonadaceae	Gemmatimonas	uncultured Gemmatimonas sp.	0	0	0	0	0	0	0	0	0	0	0	0	0	0	0	0	0	0	0	0	0	0	0	0	0	0	0	0	0	0	0	0	0	0	0	0	0	0	0	0	0
1101:5685:12037__S_080	Bacteria		Gemmatimonadetes	Gemmatimonadetes	Gemmatimonadales	Gemmatimonadaceae	Gemmatimonas	uncultured Gemmatimonas sp.	0	0	0	0	0	0	0	0	0	0	0	0	0	0	0	0	0	0	0	0	0	0	0	0	0	0	0	0	0	0	0	0	0	0	0	0	0	0	0	0	0
1101:6596:9582__S_057	Bacteria		Gemmatimonadetes	Gemmatimonadetes	Gemmatimonadales	Gemmatimonadaceae	Gemmatimonas	uncultured Gemmatimonas sp.	0	1	0	0	0	1	2	0	0	0	2	0	0	1	0	0	0	0	0	0	0	0	0	0	0	0	0	0	0	0	0	0	0	0	0	0	0	0	0	0	0
1101:8607:7343__S_111	Bacteria		Gemmatimonadetes	Gemmatimonadetes	Gemmatimonadales	Gemmatimonadaceae	Gemmatimonas	uncultured Gemmatimonas sp.	0	0	0	0	13	0	0	0	0	0	0	0	0	0	0	0	0	0	0	0	0	0	0	0	0	0	0	0	0	0	0	0	0	0	0	0	0	0	0	0	0
1101:9942:22805__S_042	Bacteria		Gemmatimonadetes	Gemmatimonadetes	Gemmatimonadales	Gemmatimonadaceae	Gemmatimonas	uncultured Gemmatimonas sp.	0	0	0	0	0	0	0	0	0	0	0	0	0	0	0	0	0	0	0	0	0	0	0	0	0	0	0	0	0	0	0	0	0	0	0	0	0	0	0	0	0
1102:15639:5022__S_021	Bacteria		Gemmatimonadetes	Gemmatimonadetes	Gemmatimonadales	Gemmatimonadaceae	Gemmatimonas	uncultured Gemmatimonas sp.	0	0	0	0	0	0	0	0	0	0	0	0	0	0	0	0	0	0	0	0	0	0	0	0	0	0	0	0	0	0	0	0	0	0	0	0	0	0	0	0	0
1102:16629:7864__S_040	Bacteria		Gemmatimonadetes	Gemmatimonadetes	Gemmatimonadales	Gemmatimonadaceae	Gemmatimonas	uncultured Gemmatimonas sp.	0	0	0	0	0	0	0	0	0	0	0	0	0	0	0	0	0	0	0	0	0	0	0	0	0	0	0	0	0	0	0	0	0	0	0	0	0	0	0	0	0
1102:17848:13953__S_079	Bacteria		Gemmatimonadetes	Gemmatimonadetes	Gemmatimonadales	Gemmatimonadaceae	Gemmatimonas	uncultured Gemmatimonas sp.	0	0	0	0	0	0	0	0	0	0	0	0	0	0	0	0	0	0	0	0	0	0	0	0	0	0	0	0	0	0	0	0	0	0	0	0	0	0	0	0	0
1102:18476:9305__S_011	Bacteria		Gemmatimonadetes	Gemmatimonadetes	Gemmatimonadales	Gemmatimonadaceae	Gemmatimonas	uncultured Gemmatimonas sp.	0	0	0	0	0	0	0	0	0	0	0	0	0	0	0	0	0	0	0	0	0	0	0	0	0	0	0	0	0	0	0	0	0	0	0	0	0	0	0	0	0
1102:20022:20468__S_124	Bacteria		Gemmatimonadetes	Gemmatimonadetes	Gemmatimonadales	Gemmatimonadaceae	Gemmatimonas	uncultured Gemmatimonas sp.	0	0	0	0	0	0	0	0	0	0	0	0	0	0	0	0	0	0	0	0	0	0	0	0	0	0	0	0	0	0	0	0	0	0	0	0	0	0	0	0	0
1102:21042:19792__S_053	Bacteria		Gemmatimonadetes	Gemmatimonadetes	Gemmatimonadales	Gemmatimonadaceae	Gemmatimonas	uncultured Gemmatimonas sp.	0	0	14	0	0	0	0	0	0	0	0	0	0	0	0	0	0	0	0	0	0	0	0	0	0	0	0	0	0	0	0	0	0	0	0	0	0	0	0	0	0
1102:23897:16619__S_086	Bacteria		Gemmatimonadetes	Gemmatimonadetes	Gemmatimonadales	Gemmatimonadaceae	Gemmatimonas	uncultured Gemmatimonas sp.	0	0	0	0	0	0	0	0	0	0	0	0	0	0	0	0	0	0	0	0	0	0	0	0	0	0	0	0	0	0	0	0	0	0	0	0	0	0	0	0	0
1102:3370:17049__S_062	Bacteria		Gemmatimonadetes	Gemmatimonadetes	Gemmatimonadales	Gemmatimonadaceae	Gemmatimonas	uncultured Gemmatimonas sp.	0	0	0	0	0	0	0	0	0	0	0	0	0	0	0	0	0	0	0	0	0	0	0	0	0	0	0	0	0	0	0	0	0	0	0	0	0	0	0	0	0
1102:6883:17119__R_090	Bacteria		Gemmatimonadetes	Gemmatimonadetes	Gemmatimonadales	Gemmatimonadaceae	Gemmatimonas	uncultured Gemmatimonas sp.	0	0	0	0	0	0	0	0	0	0	0	0	1	3	0	0	0	0	0	0	0	0	0	0	0	0	0	0	0	0	0	0	0	0	0	0	0	0	0	0	0
1101:11839:5955__S_031	Bacteria		Gemmatimonadetes	Gemmatimonadetes	Gemmatimonadales	Gemmatimonadaceae	Gemmatimonas	uncultured Gemmatimonas sp.	0	0	0	0	0	0	0	0	0	0	0	0	0	0	0	0	0	0	0	0	0	0	0	0	0	0	0	0	0	0	0	0	0	0	0	0	0	0	0	0	0
1101:14224:21229__S_021	Bacteria		Gemmatimonadetes	Gemmatimonadetes	Gemmatimonadales	Gemmatimonadaceae	Gemmatimonas	uncultured Gemmatimonas sp.	0	0	0	0	0	0	0	0	0	0	0	0	4	0	0	0	0	0	0	0	0	0	0	0	0	0	0	0	0	0	0	0	0	0	0	0	0	0	0	0	0
1101:14692:21100__S_120	Bacteria		Gemmatimonadetes	Gemmatimonadetes	Gemmatimonadales	Gemmatimonadaceae	Gemmatimonas	uncultured Gemmatimonas sp.	0	0	0	0	0	0	0	0	0	0	0	0	0	0	0	0	0	0	0	0	0	0	0	0	0	0	0	0	0	0	0	0	0	0	0	0	0	0	0	0	0
1101:17366:10392__S_023	Bacteria		Gemmatimonadetes	Gemmatimonadetes	Gemmatimonadales	Gemmatimonadaceae	Gemmatimonas	uncultured Gemmatimonas sp.	0	0	1	0	0	0	0	0	0	0	0	0	0	0	0	0	0	0	0	0	0	0	0	0	0	0	0	0	0	0	0	0	0	0	0	0	0	0	0	0	0
1101:17780:16577__S_039	Bacteria		Gemmatimonadetes	Gemmatimonadetes	Gemmatimonadales	Gemmatimonadaceae	Gemmatimonas	uncultured Gemmatimonas sp.	0	0	0	0	0	0	0	0	0	0	0	0	0	0	0	0	0	0	0	0	0	0	0	0	0	0	0	0	0	0	0	0	0	0	0	0	0	0	0	0	0
1101:18493:9287__S_032	Bacteria		Gemmatimonadetes	Gemmatimonadetes	Gemmatimonadales	Gemmatimonadaceae	Gemmatimonas	uncultured Gemmatimonas sp.	0	0	0	0	0	0	0	0	0	0	0	0	0	0	0	0	0	0	0	0	0	0	0	0	0	0	0	0	0	0	0	0	0	0	0	0	0	0	0	0	0
1101:19190:19438__S_102	Bacteria		Gemmatimonadetes	Gemmatimonadetes	Gemmatimonadales	Gemmatimonadaceae	Gemmatimonas	uncultured Gemmatimonas sp.	0	0	0	0	0	0	0	0	0	0	0	0	0	0	0	0	0	0	0	0	0	0	0	0	0	0	0	0	0	0	0	0	0	0	0	0	0	0	0	0	0
1101:19876:22878__S_028	Bacteria		Gemmatimonadetes	Gemmatimonadetes	Gemmatimonadales	Gemmatimonadaceae	Gemmatimonas	uncultured Gemmatimonas sp.	0	0	0	0	0	0	0	0	0	0	0	0	0	0	0	0	0	0	0	0	0	0	0	0	0	0	0	0	0	0	0	0	0	1	0	0	0	0	0	0	3
1101:7448:21883__S_049	Bacteria		Gemmatimonadetes	Gemmatimonadetes	Gemmatimonadales	Gemmatimonadaceae	Gemmatimonas	uncultured Gemmatimonas sp.	0	0	0	0	0	0	0	0	0	0	0	0	0	0	0	0	0	0	0	0	0	0	0	0	0	0	0	0	0	0	0	0	0	0	0	0	0	0	0	0	0
1101:7953:5169__S_082	Bacteria		Gemmatimonadetes	Gemmatimonadetes	Gemmatimonadales	Gemmatimonadaceae	Gemmatimonas	uncultured Gemmatimonas sp.	0	0	0	0	0	0	0	0	0	0	0	0	0	0	0	0	0	0	0	0	0	0	0	0	0	0	0	0	0	0	0	0	0	0	0	0	0	0	0	0	0
1102:11541:6664__S_005	Bacteria		Gemmatimonadetes	Gemmatimonadetes	Gemmatimonadales	Gemmatimonadaceae	Gemmatimonas	uncultured Gemmatimonas sp.	0	0	0	0	0	0	0	0	0	0	0	0	0	0	0	0	0	0	0	0	0	0	0	0	0	0	0	0	0	0	0	0	0	0	0	0	0	0	0	0	0
1102:11802:25199__S_002	Bacteria		Gemmatimonadetes	Gemmatimonadetes	Gemmatimonadales	Gemmatimonadaceae	Gemmatimonas	uncultured Gemmatimonas sp.	0	0	0	0	0	0	0	0	0	0	0	0	0	0	0	0	0	0	0	0	0	0	0	0	0	0	0	0	0	0	0	0	0	0	0	0	0	0	0	0	0
1102:13787:20235__S_064	Bacteria		Gemmatimonadetes	Gemmatimonadetes	Gemmatimonadales	Gemmatimonadaceae	Gemmatimonas	uncultured Gemmatimonas sp.	0	0	0	0	0	0	0	0	0	0	0	0	0	0	0	0	0	0	0	0	0	0	0	0	0	0	0	0	0	0	0	0	0	0	0	0	0	0	0	0	0
1102:15919:23745__S_013	Bacteria		Gemmatimonadetes	Gemmatimonadetes	Gemmatimonadales	Gemmatimonadaceae	Gemmatimonas	uncultured Gemmatimonas sp.	0	0	0	0	0	0	0	0	0	0	0	0	0	0	0	0	0	0	0	0	0	0	0	0	0	0	0	0	0	0	0	0	0	0	0	0	0	0	0	0	0
1102:21264:17777__S_012	Bacteria		Gemmatimonadetes	Gemmatimonadetes	Gemmatimonadales	Gemmatimonadaceae	Gemmatimonas	uncultured Gemmatimonas sp.	0	0	0	0	0	0	0	0	0	0	0	0	0	0	0	0	0	0	0	0	0	0	0	0	0	0	0	0	0	0	0	0	0	0	0	0	0	0	0	0	0
1102:22661:26524__S_122	Bacteria		Gemmatimonadetes	Gemmatimonadetes	Gemmatimonadales	Gemmatimonadaceae	Gemmatimonas	uncultured Gemmatimonas sp.	0	0	0	0	0	0	0	0	0	0	0	0	0	0	0	0	0	0	0	0	0	0	0	0	0	0	0	0	0	0	0	0	0	0	0	0	0	0	0	0	0
1102:25106:18713__S_007	Bacteria		Gemmatimonadetes	Gemmatimonadetes	Gemmatimonadales	Gemmatimonadaceae	Gemmatimonas	uncultured Gemmatimonas sp.	0	0	0	0	0	0	0	0	0	0	0	0	0	0	0	0	0	0	0	0	0	0	0	0	0	0	0	0	0	0	0	0	0	0	0	0	0	0	0	0	0
1103:12093:24682__S_035	Bacteria		Gemmatimonadetes	Gemmatimonadetes	Gemmatimonadales	Gemmatimonadaceae	Gemmatimonas	uncultured Gemmatimonas sp.	0	0	0	0	0	0	0	0	0	0	0	0	0	0	0	0	0	0	0	0	0	0	0	0	0	0	0	0	0	0	0	0	0	0	0	0	0	0	0	0	0
1103:14290:18041__S_118	Bacteria		Gemmatimonadetes	Gemmatimonadetes	Gemmatimonadales	Gemmatimonadaceae	Gemmatimonas	uncultured Gemmatimonas sp.	0	0	0	0	0	0	0	0	0	0	0	0	0	0	0	0	0	0	0	0	0	0	0	0	0	0	0	0	0	0	0	0	0	0	0	0	0	0	0	0	0
1103:14875:7209__S_011	Bacteria		Gemmatimonadetes	Gemmatimonadetes	Gemmatimonadales	Gemmatimonadaceae	Gemmatimonas	uncultured Gemmatimonas sp.	0	0	0	0	0	0	0	0	0	0	0	0	0	0	0	0	0	0	0	0	0	0	0	0	0	0	0	0	0	0	0	0	0	0	0	0	0	0	0	0	0
1103:15352:19353__S_079	Bacteria		Gemmatimonadetes	Gemmatimonadetes	Gemmatimonadales	Gemmatimonadaceae	Gemmatimonas	uncultured Gemmatimonas sp.	0	0	0	0	0	0	0	0	0	0	0	0	0	0	0	0	0	0	0	0	0	0	0	0	0	0	0	0	0	0	0	0	0	0	0	0	0	0	0	0	0
1103:15481:2788__S_104	Bacteria		Gemmatimonadetes	Gemmatimonadetes	Gemmatimonadales	Gemmatimonadaceae	Gemmatimonas	uncultured Gemmatimonas sp.	0	0	0	0	0	0	0	0	0	0	0	0	0	0	0	0	0	0	0	0	0	0	0	0	0	0	0	0	0	0	0	0	0	0	0	0	0	0	0	0	0
1103:15566:4807__S_038	Bacteria		Gemmatimonadetes	Gemmatimonadetes	Gemmatimonadales	Gemmatimonadaceae	Gemmatimonas	uncultured Gemmatimonas sp.	0	0	0	0	0	0	0	0	0	0	0	0	0	0	0	0	0	0	0	0	0	0	0	0	0	0	0	0	0	0	0	0	0	0	0	0	0	0	0	0	0
1103:16310:13226__S_042	Bacteria		Gemmatimonadetes	Gemmatimonadetes	Gemmatimonadales	Gemmatimonadaceae	Gemmatimonas	uncultured Gemmatimonas sp.	0	0	0	0	0	0	0	0	0	0	0	0	0	0	0	0	0	0	0	0	0	0	0	0	0	0	0	0	0	0	0	0	0	0	0	0	0	0	0	0	0
1103:16818:25647__S_039	Bacteria		Gemmatimonadetes	Gemmatimonadetes	Gemmatimonadales	Gemmatimonadaceae	Gemmatimonas	uncultured Gemmatimonas sp.	0	0	0	0	0	0	0	0	0	0	0	0	0	0	0	0	0	0	0	0	0	0	0	0	0	0	0	0	0	0	0	0	0	0	0	0	0	0	0	0	0
1103:26119:23513__S_100	Bacteria		Gemmatimonadetes	Gemmatimonadetes	Gemmatimonadales	Gemmatimonadaceae	Gemmatimonas	uncultured Gemmatimonas sp.	0	0	0	0	0	0	0	0	0	0	0	0	0	0	0	0	0	0	0	0	0	0	0	0	0	0	0	0	0	0	0	0	0	0	0	0	0	0	0	0	0
1103:4962:15583__S_018	Bacteria		Gemmatimonadetes	Gemmatimonadetes	Gemmatimonadales	Gemmatimonadaceae	Gemmatimonas	uncultured Gemmatimonas sp.	0	0	0	0	0	0	0	1	0	0	0	0	0	0	0	0	0	0	0	0	0	0	0	0	0	0	0	0	0	0	0	0	0	0	0	0	0	0	0	0	0
1103:5867:16025__R_001	Bacteria		Gemmatimonadetes	Gemmatimonadetes	Gemmatimonadales	Gemmatimonadaceae	Gemmatimonas	uncultured Gemmatimonas sp.	11	0	0	0	0	0	0	0	0	0	0	0	0	0	0	0	0	0	0	0	0	0	0	0	0	0	0	0	0	0	0	0	0	0	0	0	0	0	0	0	0
1104:11079:9145__S_007	Bacteria		Gemmatimonadetes	Gemmatimonadetes	Gemmatimonadales	Gemmatimonadaceae	Gemmatimonas	uncultured Gemmatimonas sp.	0	0	0	0	0	0	0	0	0	0	0	0	0	0	0	0	0	0	0	0	0	0	0	0	0	0	0	0	0	0	0	0	0	0	0	0	0	0	0	0	0
1104:11995:9913__S_046	Bacteria		Gemmatimonadetes	Gemmatimonadetes	Gemmatimonadales	Gemmatimonadaceae	Gemmatimonas	uncultured Gemmatimonas sp.	0	0	0	0	0	0	0	0	0	0	0	0	0	0	0	0	0	0	0	0	0	0	0	0	0	0	0	0	0	0	0	0	0	0	0	0	0	0	0	0	0
1104:14917:22805__S_104	Bacteria		Gemmatimonadetes	Gemmatimonadetes	Gemmatimonadales	Gemmatimonadaceae	Gemmatimonas	uncultured Gemmatimonas sp.	0	0	0	0	0	0	0	0	0	0	0	0	0	0	0	0	0	0	0	0	0	0	0	0	0	0	0	0	0	0	0	0	0	0	0	0	0	0	0	0	0
1104:15714:9946__S_038	Bacteria		Gemmatimonadetes	Gemmatimonadetes	Gemmatimonadales	Gemmatimonadaceae	Gemmatimonas	uncultured Gemmatimonas sp.	0	0	0	0	0	0	0	0	0	0	0	0	0	0	0	0	0	0	26	0	0	0	0	0	0	0	0	0	0	0	0	0	0	0	0	0	0	0	0	0	0
1104:18266:26055__S_086	Bacteria		Gemmatimonadetes	Gemmatimonadetes	Gemmatimonadales	Gemmatimonadaceae	Gemmatimonas	uncultured Gemmatimonas sp.	0	0	0	0	0	0	0	0	0	0	0	0	0	0	0	0	0	0	0	0	0	0	0	0	0	0	0	0	0	0	0	0	0	0	0	0	0	0	0	0	0
1104:4851:7633__S_008	Bacteria		Gemmatimonadetes	Gemmatimonadetes	Gemmatimonadales	Gemmatimonadaceae	Gemmatimonas	uncultured Gemmatimonas sp.	0	0	0	0	0	0	0	0	0	0	0	0	0	0	0	0	0	0	0	0	0	0	0	0	0	0	0	0	0	0	0	0	0	0	0	0	0	0	0	0	0
2101:16406:25719__S_027	Bacteria		Gemmatimonadetes	Gemmatimonadetes	Gemmatimonadales	Gemmatimonadaceae	Gemmatimonas	uncultured Gemmatimonas sp.	0	0	0	0	0	0	0	0	0	0	0	0	0	0	0	0	0	0	0	0	0	0	0	0	0	0	0	0	0	0	0	0	0	0	0	0	0	0	0	0	0
2101:5832:6978__S_102	Bacteria		Gemmatimonadetes	Gemmatimonadetes	Gemmatimonadales	Gemmatimonadaceae	Gemmatimonas	uncultured Gemmatimonas sp.	0	0	0	0	0	0	0	0	0	0	0	0	0	0	0	0	0	0	0	0	0	0	0	0	0	0	0	0	0	0	0	0	0	0	0	0	0	0	0	0	0
2102:10670:12179__S_017	Bacteria		Gemmatimonadetes	Gemmatimonadetes	Gemmatimonadales	Gemmatimonadaceae	Gemmatimonas	uncultured Gemmatimonas sp.	0	0	0	0	0	0	0	0	0	0	0	0	0	0	0	0	0	0	0	0	0	0	0	0	0	0	0	0	0	0	0	0	0	0	0	0	0	0	0	0	0
2102:15480:13627__S_006	Bacteria		Gemmatimonadetes	Gemmatimonadetes	Gemmatimonadales	Gemmatimonadaceae	Gemmatimonas	uncultured Gemmatimonas sp.	0	0	0	0	0	0	0	0	0	0	0	0	0	0	0	0	0	0	0	0	0	0	0	0	0	0	0	0	0	0	0	0	0	0	0	0	0	0	0	0	0
2102:16365:16633__S_020	Bacteria		Gemmatimonadetes	Gemmatimonadetes	Gemmatimonadales	Gemmatimonadaceae	Gemmatimonas	uncultured Gemmatimonas sp.	0	0	0	0	0	0	0	0	0	0	0	0	0	0	0	0	0	0	0	0	0	0	0	0	0	0	0	0	0	0	0	0	0	0	0	0	0	0	0	0	0
2102:21379:3721__S_124	Bacteria		Gemmatimonadetes	Gemmatimonadetes	Gemmatimonadales	Gemmatimonadaceae	Gemmatimonas	uncultured Gemmatimonas sp.	0	0	0	0	0	0	0	0	0	0	0	0	0	0	0	0	0	0	0	0	0	0	0	0	0	0	0	0	0	0	0	0	0	0	0	0	0	0	0	0	0
2102:23142:20704__S_017	Bacteria		Gemmatimonadetes	Gemmatimonadetes	Gemmatimonadales	Gemmatimonadaceae	Gemmatimonas	uncultured Gemmatimonas sp.	0	0	0	0	0	0	0	0	0	0	0	0	0	0	0	0	0	0	0	0	0	0	0	0	0	0	0	0	0	0	0	0	0	0	0	0	0	0	0	0	0
2103:15008:20439__S_008	Bacteria		Gemmatimonadetes	Gemmatimonadetes	Gemmatimonadales	Gemmatimonadaceae	Gemmatimonas	uncultured Gemmatimonas sp.	0	0	0	0	0	0	0	0	0	0	0	0	0	0	0	0	0	0	0	0	0	0	0	0	0	0	0	0	0	0	0	0	0	0	0	0	0	0	0	0	0
2103:18806:14953__S_032	Bacteria		Gemmatimonadetes	Gemmatimonadetes	Gemmatimonadales	Gemmatimonadaceae	Gemmatimonas	uncultured Gemmatimonas sp.	0	0	0	0	0	0	0	0	0	0	0	0	0	0	0	0	0	0	0	0	0	0	0	0	0	0	0	0	0	0	0	0	0	0	0	0	0	0	0	0	0
2104:17136:8707__S_018	Bacteria		Gemmatimonadetes	Gemmatimonadetes	Gemmatimonadales	Gemmatimonadaceae	Gemmatimonas	uncultured Gemmatimonas sp.	0	0	3	0	0	0	0	0	0	0	0	1	0	0	0	0	0	0	0	0	0	0	0	0	0	0	0	0	0	0	0	0	0	0	0	0	0	0	0	0	0
2104:25294:10397__S_040	Bacteria		Gemmatimonadetes	Gemmatimonadetes	Gemmatimonadales	Gemmatimonadaceae	Gemmatimonas	uncultured Gemmatimonas sp.	0	0	0	0	0	0	0	0	0	0	0	0	0	0	0	0	0	0	0	0	0	0	0	0	0	0	0	0	0	0	0	0	0	0	0	0	0	0	0	0	0
2104:25343:23437__S_047	Bacteria		Gemmatimonadetes	Gemmatimonadetes	Gemmatimonadales	Gemmatimonadaceae	Gemmatimonas	uncultured Gemmatimonas sp.	0	0	0	0	0	0	0	0	0	0	0	0	0	0	0	0	0	0	0	0	0	0	0	0	0	0	0	0	0	0	0	0	0	0	0	0	0	0	0	0	0
2104:6634:12964__S_067	Bacteria		Gemmatimonadetes	Gemmatimonadetes	Gemmatimonadales	Gemmatimonadaceae	Gemmatimonas	uncultured Gemmatimonas sp.	0	0	0	0	0	0	0	0	0	0	0	0	0	0	0	0	0	0	0	0	0	0	0	0	0	0	0	0	0	0	0	0	0	0	0	0	0	0	0	0	0
1101:16009:6543__S_024	Bacteria		Gemmatimonadetes	Gemmatimonadetes	Gemmatimonadales	Gemmatimonadaceae	Gemmatimonas		0	0	0	0	0	0	0	0	0	0	0	0	0	0	0	0	0	0	0	0	0	0	0	0	0	0	0	0	0	0	0	0	0	0	0	0	0	0	0	0	0
1101:17900:3888__S_077	Bacteria		Gemmatimonadetes	Gemmatimonadetes	Gemmatimonadales	Gemmatimonadaceae	Gemmatimonas		0	0	0	2	0	3	0	0	0	0	0	0	0	3	0	2	0	0	1	0	0	14	15	0	2	0	5	0	0	1	0	0	0	0	0	1	0	0	0	0	0
1101:3114:14707__S_014	Bacteria		Gemmatimonadetes	Gemmatimonadetes	Gemmatimonadales	Gemmatimonadaceae	Gemmatimonas		0	0	0	0	0	0	0	0	0	0	0	0	0	0	0	0	0	0	0	0	0	0	0	0	0	0	0	0	0	0	0	0	0	0	0	0	0	0	0	0	0
1104:18793:10487__S_131	Bacteria		Gemmatimonadetes	Gemmatimonadetes	Gemmatimonadales	Gemmatimonadaceae	Gemmatimonas		0	0	0	0	0	0	0	0	0	0	0	0	0	0	0	0	0	0	0	0	0	0	0	0	0	0	0	0	0	0	0	0	0	0	0	0	0	0	0	0	0
1102:18753:9361__S_122	Bacteria		Gemmatimonadetes	Gemmatimonadetes	Gemmatimonadales	Gemmatimonadaceae			0	0	0	0	1	1	2	0	0	0	0	0	0	0	0	0	0	0	0	4	0	1	1	0	0	0	0	0	0	0	0	0	0	0	0	0	0	0	0	0	0
1101:20217:14007__S_058	Bacteria		Nitrospirae	Nitrospira	Nitrospirales	Nitrospiraceae	Nitrospira	uncultured Nitrospira sp.	0	0	0	0	0	0	0	0	0	0	0	0	0	0	0	0	0	0	0	0	0	0	0	0	0	0	0	0	0	0	0	0	0	0	0	0	0	0	0	0	0
1101:22370:10756__S_118	Bacteria		Nitrospirae	Nitrospira	Nitrospirales	Nitrospiraceae	Nitrospira	uncultured Nitrospira sp.	0	0	0	0	0	0	0	0	0	0	0	0	0	0	0	0	0	0	0	0	0	0	0	0	0	0	0	0	0	0	0	0	0	0	0	0	0	0	0	0	0
1101:7376:13741__S_005	Bacteria		Nitrospirae	Nitrospira	Nitrospirales	Nitrospiraceae	Nitrospira	uncultured Nitrospira sp.	0	0	0	0	0	0	0	0	0	0	0	0	0	0	0	0	0	0	0	0	0	0	0	0	0	0	0	0	0	0	0	0	0	0	0	0	0	0	0	0	0
1102:14199:17536__S_023	Bacteria		Nitrospirae	Nitrospira	Nitrospirales	Nitrospiraceae	Nitrospira	uncultured Nitrospira sp.	0	0	0	0	0	0	0	0	0	0	0	0	0	0	0	0	0	0	0	0	0	0	0	0	0	0	0	0	0	0	0	0	0	0	0	0	0	0	0	0	0
1102:21226:6464__S_014	Bacteria		Nitrospirae	Nitrospira	Nitrospirales	Nitrospiraceae	Nitrospira	uncultured Nitrospira sp.	0	0	0	0	0	0	0	0	0	0	0	0	0	0	0	0	0	0	0	0	0	0	0	0	0	0	0	0	0	0	0	0	0	0	0	0	0	0	0	0	0
1102:28308:18508__S_023	Bacteria		Nitrospirae	Nitrospira	Nitrospirales	Nitrospiraceae	Nitrospira	uncultured Nitrospira sp.	0	0	0	0	0	0	0	0	0	0	0	0	0	0	0	0	0	0	0	0	0	0	0	0	0	0	0	0	0	0	0	0	0	0	0	0	0	0	0	0	0
1101:5615:18254__R_114	Bacteria		Nitrospirae	Nitrospira	Nitrospirales	Nitrospiraceae	Nitrospira	uncultured Nitrospira sp.	0	0	0	0	0	0	0	0	0	0	0	0	0	0	0	0	0	0	0	0	0	0	0	0	0	0	0	0	0	0	0	0	0	0	0	0	0	0	0	0	0
1102:14126:19221__S_062	Bacteria		Nitrospirae	Nitrospira	Nitrospirales	Nitrospiraceae	Nitrospira	uncultured Nitrospira sp.	0	0	0	0	0	0	0	0	0	0	0	0	0	0	0	0	0	0	0	0	0	0	0	0	0	0	0	0	0	0	0	0	0	0	0	0	0	0	0	0	0
1102:14997:8374__S_041	Bacteria		Nitrospirae	Nitrospira	Nitrospirales	Nitrospiraceae	Nitrospira	uncultured Nitrospira sp.	0	0	0	0	0	0	0	0	0	0	0	0	0	0	0	0	0	0	0	0	0	0	0	0	0	0	0	0	0	0	0	0	0	0	0	0	0	0	0	0	0
1102:21902:11842__S_021	Bacteria		Nitrospirae	Nitrospira	Nitrospirales	Nitrospiraceae	Nitrospira	uncultured Nitrospira sp.	0	0	0	3	1	0	0	0	0	0	0	0	0	0	1	0	0	0	0	0	0	1	0	0	0	0	0	0	0	0	0	0	0	0	0	0	0	0	0	0	0
1103:20569:2367__S_118	Bacteria		Nitrospirae	Nitrospira	Nitrospirales	Nitrospiraceae	Nitrospira	uncultured Nitrospira sp.	0	0	0	0	0	0	0	0	0	0	0	0	0	0	0	0	0	0	0	0	0	0	0	0	0	0	0	0	0	0	0	0	0	0	0	0	0	0	0	0	0
1104:15045:16830__S_023	Bacteria		Nitrospirae	Nitrospira	Nitrospirales	Nitrospiraceae	Nitrospira	uncultured Nitrospira sp.	0	0	0	0	0	0	0	0	0	0	0	0	0	0	0	0	0	0	0	0	0	0	0	0	0	0	0	0	0	0	0	0	0	0	0	0	0	0	0	0	0
2101:12815:17483__S_052	Bacteria		Nitrospirae	Nitrospira	Nitrospirales	Nitrospiraceae	Nitrospira	uncultured Nitrospira sp.	0	0	0	0	0	0	0	0	0	0	0	0	0	0	0	0	0	0	0	0	0	0	0	0	0	0	0	0	0	0	0	0	0	0	0	0	0	0	0	0	0
2102:6156:7945__S_045	Bacteria		Nitrospirae	Nitrospira	Nitrospirales	Nitrospiraceae	Nitrospira	uncultured Nitrospira sp.	0	0	0	0	0	0	0	0	0	0	0	0	0	0	0	0	0	0	0	0	0	0	0	0	0	0	0	0	0	0	0	0	0	0	0	0	0	0	0	0	0
1104:5629:20020__S_024	Bacteria		Nitrospirae	Nitrospira	Nitrospirales	Nitrospiraceae	Nitrospira		0	0	0	0	0	0	0	0	0	0	0	0	0	0	0	0	0	0	0	0	0	0	0	0	0	0	0	0	0	0	0	0	0	0	0	0	0	0	0	0	0
1101:10692:4375__S_038	Bacteria		Planctomycetes	Phycisphaerae	Phycisphaerales	Phycisphaeraceae	Phycisphaera	uncultured Phycisphaera sp.	0	0	0	0	0	0	0	0	0	0	0	0	0	0	0	7	0	0	0	0	0	0	0	0	0	0	0	0	0	0	0	0	0	0	0	0	0	0	0	0	0
1101:14902:17616__S_027	Bacteria		Planctomycetes	Phycisphaerae	Phycisphaerales	Phycisphaeraceae	Phycisphaera	uncultured Phycisphaera sp.	0	0	0	0	0	0	0	0	0	0	0	0	0	0	0	0	0	0	0	0	0	0	0	0	0	0	0	0	0	0	0	0	0	0	0	0	0	0	0	0	0
1101:18595:4165__S_042	Bacteria		Planctomycetes	Phycisphaerae	Phycisphaerales	Phycisphaeraceae	Phycisphaera	uncultured Phycisphaera sp.	0	0	0	0	0	0	0	0	0	0	0	0	0	0	0	0	0	0	0	0	0	0	0	0	0	0	0	0	0	0	0	0	0	0	0	0	0	0	0	0	0
1101:9992:19540__S_062	Bacteria		Planctomycetes	Phycisphaerae	Phycisphaerales	Phycisphaeraceae	Phycisphaera	uncultured Phycisphaera sp.	0	0	0	0	0	0	0	0	0	0	0	0	0	0	0	0	0	0	0	0	0	0	0	0	0	0	0	0	0	0	0	0	0	0	0	0	0	0	0	0	0
1102:18551:10795__S_093	Bacteria		Planctomycetes	Phycisphaerae	Phycisphaerales	Phycisphaeraceae	Phycisphaera	uncultured Phycisphaera sp.	0	0	0	0	0	0	0	0	0	0	0	0	0	0	0	0	0	0	0	0	0	0	0	0	0	0	0	0	0	0	0	0	0	0	0	0	0	0	0	0	0
1101:16450:26531__S_013	Bacteria		Planctomycetes	Phycisphaerae	Phycisphaerales	Phycisphaeraceae	Phycisphaera	uncultured Phycisphaera sp.	0	0	0	0	0	0	0	0	0	0	0	0	0	0	0	0	0	0	0	0	0	0	0	0	0	0	0	0	0	0	0	0	0	0	0	0	0	0	0	0	0
1101:16771:22529__S_067	Bacteria		Planctomycetes	Phycisphaerae	Phycisphaerales	Phycisphaeraceae	Phycisphaera	uncultured Phycisphaera sp.	0	0	0	0	0	0	0	0	0	0	0	0	0	0	0	0	0	0	0	0	0	0	0	0	0	0	0	0	0	0	0	0	0	0	0	0	0	0	0	0	0
1104:12113:22309__S_028	Bacteria		Planctomycetes	Phycisphaerae	Phycisphaerales	Phycisphaeraceae	Phycisphaera	uncultured Phycisphaera sp.	0	0	0	0	0	0	0	0	0	0	0	0	0	0	1	0	0	0	0	0	0	0	0	0	0	0	0	0	0	0	0	0	0	0	0	0	0	0	0	0	0
1101:11356:6391__S_100	Bacteria		Planctomycetes	Planctomycetia	Planctomycetales	Gemmataceae	Gemmata	uncultured Gemmata sp.	0	0	3	0	0	0	0	0	0	0	0	0	0	0	0	0	0	0	0	0	0	0	0	0	0	0	0	0	0	0	0	0	0	0	0	0	0	0	0	0	0
1101:12404:3549__S_053	Bacteria		Planctomycetes	Planctomycetia	Planctomycetales	Gemmataceae	Gemmata	uncultured Gemmata sp.	0	0	0	0	0	0	0	0	0	0	0	0	0	0	0	0	0	0	0	0	0	0	0	0	0	0	0	0	0	0	0	0	0	0	0	0	0	0	0	0	0
1101:13030:23689__S_130	Bacteria		Planctomycetes	Planctomycetia	Planctomycetales	Gemmataceae	Gemmata	uncultured Gemmata sp.	0	0	0	0	0	0	0	0	0	0	0	0	0	0	0	0	0	0	0	0	0	0	0	0	0	0	0	0	0	0	0	0	0	0	0	2	0	0	0	0	0
1101:13858:12564__S_062	Bacteria		Planctomycetes	Planctomycetia	Planctomycetales	Gemmataceae	Gemmata	uncultured Gemmata sp.	0	0	0	0	0	0	0	0	0	0	0	0	0	0	0	0	0	0	0	0	0	0	0	0	0	0	0	0	0	0	0	0	0	0	0	0	0	0	0	0	0
1101:14904:15107__S_095	Bacteria		Planctomycetes	Planctomycetia	Planctomycetales	Gemmataceae	Gemmata	uncultured Gemmata sp.	0	0	0	0	0	1	0	0	0	0	0	0	0	0	0	0	0	0	0	0	0	0	0	0	0	0	0	0	0	0	0	4	0	0	0	0	0	0	0	0	0
1101:16358:16503__R_111	Bacteria		Planctomycetes	Planctomycetia	Planctomycetales	Gemmataceae	Gemmata	uncultured Gemmata sp.	0	0	0	1	0	0	0	0	0	0	0	0	0	0	0	0	0	0	0	0	2	0	0	0	0	0	0	0	0	0	0	0	0	0	0	0	0	0	0	0	0
1101:16416:20266__R_041	Bacteria		Planctomycetes	Planctomycetia	Planctomycetales	Gemmataceae	Gemmata	uncultured Gemmata sp.	0	0	0	0	0	0	0	0	0	0	0	1	0	0	0	0	0	1	0	0	0	0	0	0	0	0	0	0	0	0	0	0	0	0	0	0	0	1	0	0	20
1101:18144:9378__S_112	Bacteria		Planctomycetes	Planctomycetia	Planctomycetales	Gemmataceae	Gemmata	uncultured Gemmata sp.	0	0	0	0	0	0	0	0	0	0	0	0	0	0	0	0	0	0	0	0	0	0	0	0	0	0	0	0	0	0	0	0	0	0	0	0	0	0	0	0	0
1101:19457:11466__R_024	Bacteria		Planctomycetes	Planctomycetia	Planctomycetales	Gemmataceae	Gemmata	uncultured Gemmata sp.	0	0	0	0	0	0	0	13	0	0	0	0	0	1	0	0	1	0	0	0	0	0	0	49	0	0	0	0	0	0	0	0	0	4	0	0	0	1	0	0	0
1101:19814:11306__R_096	Bacteria		Planctomycetes	Planctomycetia	Planctomycetales	Gemmataceae	Gemmata	uncultured Gemmata sp.	0	0	0	0	0	0	0	2	0	0	0	0	0	0	0	0	0	0	0	0	0	0	0	0	0	0	0	0	0	0	0	0	0	0	14	17	0	0	0	0	0
1101:21526:24433__R_019	Bacteria		Planctomycetes	Planctomycetia	Planctomycetales	Gemmataceae	Gemmata	uncultured Gemmata sp.	0	0	0	0	0	0	0	0	0	0	0	0	0	0	0	0	0	0	10	0	0	0	0	0	0	0	0	0	0	0	0	0	0	0	0	0	0	0	0	0	0
1101:21951:19524__S_086	Bacteria		Planctomycetes	Planctomycetia	Planctomycetales	Gemmataceae	Gemmata	uncultured Gemmata sp.	0	0	0	0	0	0	0	0	0	0	0	0	0	0	0	0	0	0	0	0	0	0	0	0	0	0	0	0	0	0	0	0	0	0	0	0	0	0	0	0	4
1101:22641:11475__S_066	Bacteria		Planctomycetes	Planctomycetia	Planctomycetales	Gemmataceae	Gemmata	uncultured Gemmata sp.	0	0	0	0	0	0	0	0	0	0	2	0	0	0	0	0	0	0	0	0	0	0	0	0	0	0	0	0	0	0	0	0	0	0	0	0	0	0	0	0	0
1101:23095:15883__S_062	Bacteria		Planctomycetes	Planctomycetia	Planctomycetales	Gemmataceae	Gemmata	uncultured Gemmata sp.	0	0	0	0	0	0	0	0	0	0	0	0	0	0	0	0	0	0	0	0	0	0	0	0	0	0	0	0	0	0	0	0	0	0	0	0	0	0	0	0	0
1101:24185:26282__R_008	Bacteria		Planctomycetes	Planctomycetia	Planctomycetales	Gemmataceae	Gemmata	uncultured Gemmata sp.	0	0	0	0	0	0	0	15	0	0	0	0	0	0	0	0	0	0	0	0	0	0	0	0	0	0	0	0	0	0	0	0	0	0	0	0	0	0	0	0	0
1101:24473:8354__S_017	Bacteria		Planctomycetes	Planctomycetia	Planctomycetales	Gemmataceae	Gemmata	uncultured Gemmata sp.	0	0	0	0	0	0	0	0	0	0	0	0	0	0	0	0	0	0	0	0	0	0	0	0	0	0	0	0	0	0	0	0	0	0	0	0	0	0	0	0	0
1101:25106:12464__S_109	Bacteria		Planctomycetes	Planctomycetia	Planctomycetales	Gemmataceae	Gemmata	uncultured Gemmata sp.	0	0	0	0	0	0	0	0	0	0	0	0	0	0	0	0	0	0	0	0	0	0	0	0	0	0	0	0	0	0	0	1	0	0	0	0	0	0	0	0	0
1101:26077:22022__S_056	Bacteria		Planctomycetes	Planctomycetia	Planctomycetales	Gemmataceae	Gemmata	uncultured Gemmata sp.	0	0	0	0	0	0	0	0	0	0	0	0	0	0	0	0	0	0	0	0	0	0	0	0	0	0	0	0	0	0	0	0	0	0	0	0	0	0	0	0	0
1101:26631:19766__R_072	Bacteria		Planctomycetes	Planctomycetia	Planctomycetales	Gemmataceae	Gemmata	uncultured Gemmata sp.	0	0	0	0	0	0	0	0	0	0	0	0	0	0	0	0	0	0	0	0	0	0	0	0	0	0	0	0	0	0	0	0	0	0	0	0	0	0	0	0	0
1101:27084:14748__S_096	Bacteria		Planctomycetes	Planctomycetia	Planctomycetales	Gemmataceae	Gemmata	uncultured Gemmata sp.	0	0	0	2	0	0	0	0	0	0	0	1	0	0	0	0	0	0	0	0	0	0	0	0	0	0	0	0	0	0	0	0	0	0	0	0	0	0	0	0	0
1101:7741:25333__S_124	Bacteria		Planctomycetes	Planctomycetia	Planctomycetales	Gemmataceae	Gemmata	uncultured Gemmata sp.	0	0	0	0	0	0	0	0	0	0	0	0	0	0	0	0	0	0	0	0	0	0	0	0	0	0	0	0	0	0	0	0	0	0	0	0	0	0	0	0	0
1101:8677:4665__S_110	Bacteria		Planctomycetes	Planctomycetia	Planctomycetales	Gemmataceae	Gemmata	uncultured Gemmata sp.	0	0	0	0	0	0	0	0	0	0	0	0	0	0	0	0	0	0	0	0	0	0	0	0	0	0	0	0	0	0	0	0	0	0	0	0	0	0	0	0	0
1102:11960:24925__S_077	Bacteria		Planctomycetes	Planctomycetia	Planctomycetales	Gemmataceae	Gemmata	uncultured Gemmata sp.	0	0	0	0	0	0	0	0	0	0	0	0	0	0	0	0	0	0	0	0	0	0	0	0	0	0	0	0	0	0	0	0	0	0	0	0	0	0	0	0	0
1102:14564:12484__S_092	Bacteria		Planctomycetes	Planctomycetia	Planctomycetales	Gemmataceae	Gemmata	uncultured Gemmata sp.	0	0	0	0	0	0	0	0	0	0	0	0	0	0	0	0	0	0	0	0	0	0	0	0	0	0	0	0	0	0	0	0	0	0	0	0	0	0	0	0	0
1102:14701:15450__S_037	Bacteria		Planctomycetes	Planctomycetia	Planctomycetales	Gemmataceae	Gemmata	uncultured Gemmata sp.	0	0	0	0	0	0	0	0	0	0	0	0	0	0	0	0	0	0	0	0	0	0	0	0	0	0	0	0	0	0	0	0	0	0	0	0	0	0	0	0	0
1102:14856:14906__S_081	Bacteria		Planctomycetes	Planctomycetia	Planctomycetales	Gemmataceae	Gemmata	uncultured Gemmata sp.	0	0	0	0	0	0	0	0	0	0	0	0	0	0	0	0	0	0	0	0	0	0	0	0	0	0	2	0	0	0	0	0	0	0	0	0	0	0	0	0	0
1102:15785:24319__S_064	Bacteria		Planctomycetes	Planctomycetia	Planctomycetales	Gemmataceae	Gemmata	uncultured Gemmata sp.	0	0	0	0	0	0	0	0	0	0	0	0	0	0	0	0	0	0	0	0	0	0	0	0	0	0	0	0	0	0	0	0	0	0	0	3	0	0	0	0	0
1102:17388:18524__R_036	Bacteria		Planctomycetes	Planctomycetia	Planctomycetales	Gemmataceae	Gemmata	uncultured Gemmata sp.	0	0	0	0	0	0	0	0	0	0	0	0	0	0	0	0	0	0	0	0	1	0	0	0	0	0	1	0	0	0	0	0	0	0	0	29	0	0	0	0	0
1102:17446:25860__R_116	Bacteria		Planctomycetes	Planctomycetia	Planctomycetales	Gemmataceae	Gemmata	uncultured Gemmata sp.	0	0	0	0	0	0	0	0	0	0	0	0	0	0	0	0	0	0	0	0	0	0	2	0	0	0	0	0	0	0	0	0	0	0	10	0	0	0	0	0	0
1102:18549:24308__S_071	Bacteria		Planctomycetes	Planctomycetia	Planctomycetales	Gemmataceae	Gemmata	uncultured Gemmata sp.	0	0	0	0	0	0	0	0	0	0	0	0	0	0	0	0	0	0	0	0	0	0	0	0	0	0	0	0	0	0	0	0	0	0	0	0	0	0	0	0	0
1102:20041:9896__S_046	Bacteria		Planctomycetes	Planctomycetia	Planctomycetales	Gemmataceae	Gemmata	uncultured Gemmata sp.	0	0	0	0	0	2	0	0	0	0	0	0	0	0	0	0	0	0	0	14	0	0	0	0	0	0	0	0	0	0	0	0	0	0	0	0	0	0	0	0	0
1102:20590:7364__R_018	Bacteria		Planctomycetes	Planctomycetia	Planctomycetales	Gemmataceae	Gemmata	uncultured Gemmata sp.	0	0	0	0	0	0	0	0	0	0	0	0	9	0	0	0	0	8	0	0	0	0	0	0	0	0	0	0	0	0	0	0	7	0	0	0	0	0	0	0	0
1102:21293:4215__S_096	Bacteria		Planctomycetes	Planctomycetia	Planctomycetales	Gemmataceae	Gemmata	uncultured Gemmata sp.	2	0	0	2	0	0	5	0	0	0	0	0	0	0	0	0	0	0	0	0	0	0	0	0	0	0	0	0	0	0	0	0	0	0	0	0	0	0	0	0	0
1102:22151:22397__S_053	Bacteria		Planctomycetes	Planctomycetia	Planctomycetales	Gemmataceae	Gemmata	uncultured Gemmata sp.	0	0	0	0	0	0	0	0	0	0	0	0	0	0	0	0	0	0	0	0	0	0	0	0	0	0	0	0	0	0	0	0	0	0	0	0	0	0	0	0	0
1102:23065:21665__R_041	Bacteria		Planctomycetes	Planctomycetia	Planctomycetales	Gemmataceae	Gemmata	uncultured Gemmata sp.	0	0	0	1	0	0	0	0	0	0	0	0	0	0	0	0	0	0	0	0	0	0	0	0	0	0	0	0	0	0	0	0	0	0	0	0	0	0	0	0	20
1102:25094:11885__S_024	Bacteria		Planctomycetes	Planctomycetia	Planctomycetales	Gemmataceae	Gemmata	uncultured Gemmata sp.	0	0	0	0	0	0	0	0	0	0	0	0	0	0	0	0	0	0	0	0	0	0	0	0	0	0	0	0	0	0	0	0	0	0	0	0	0	0	0	0	0
1102:5227:21125__S_074	Bacteria		Planctomycetes	Planctomycetia	Planctomycetales	Gemmataceae	Gemmata	uncultured Gemmata sp.	0	0	0	0	0	0	0	0	0	0	0	0	0	0	0	0	0	0	0	0	0	0	0	0	0	0	0	0	0	0	0	0	0	0	0	0	0	0	0	0	0
1102:5413:7813__S_055	Bacteria		Planctomycetes	Planctomycetia	Planctomycetales	Gemmataceae	Gemmata	uncultured Gemmata sp.	0	0	0	0	0	0	0	0	0	0	0	0	0	0	0	0	0	0	0	0	0	0	0	0	0	0	0	0	0	0	0	0	0	0	0	0	0	0	0	0	0
1102:7215:13802__S_006	Bacteria		Planctomycetes	Planctomycetia	Planctomycetales	Gemmataceae	Gemmata	uncultured Gemmata sp.	0	0	0	0	0	0	0	0	0	0	2	0	0	0	0	0	0	0	0	0	0	0	0	0	0	0	0	0	0	0	0	0	0	0	0	0	0	0	0	0	9
1102:7428:9452__R_106	Bacteria		Planctomycetes	Planctomycetia	Planctomycetales	Gemmataceae	Gemmata	uncultured Gemmata sp.	0	0	0	0	0	0	0	0	0	0	2	0	0	0	0	0	0	0	0	0	0	0	0	0	0	0	0	0	0	0	0	0	0	0	0	0	0	0	0	0	0
1101:13789:9983__S_071	Bacteria		Planctomycetes	Planctomycetia	Planctomycetales	Gemmataceae	Gemmata	uncultured Gemmata sp.	0	0	0	0	0	0	0	0	0	0	0	0	0	0	0	0	0	0	0	0	0	0	0	0	0	0	0	0	0	0	0	0	0	0	0	0	0	0	0	0	0
1101:15880:13248__S_012	Bacteria		Planctomycetes	Planctomycetia	Planctomycetales	Gemmataceae	Gemmata	uncultured Gemmata sp.	0	0	0	0	0	0	0	0	0	0	0	0	0	0	0	0	0	0	7	0	0	0	0	0	0	0	6	0	0	0	0	0	0	0	0	0	0	0	0	0	5
1101:20107:2961__R_096	Bacteria		Planctomycetes	Planctomycetia	Planctomycetales	Gemmataceae	Gemmata	uncultured Gemmata sp.	0	0	0	0	0	0	0	0	0	0	0	0	0	0	0	0	0	0	0	0	0	0	0	0	0	0	0	0	0	0	0	0	0	0	0	0	0	0	0	0	0
1101:22966:14731__R_110	Bacteria		Planctomycetes	Planctomycetia	Planctomycetales	Gemmataceae	Gemmata	uncultured Gemmata sp.	0	0	0	0	0	0	0	0	0	0	0	0	0	0	0	0	0	0	0	0	0	0	0	0	0	0	0	0	0	0	0	0	0	0	0	0	0	0	0	0	0
1101:24091:9854__S_103	Bacteria		Planctomycetes	Planctomycetia	Planctomycetales	Gemmataceae	Gemmata	uncultured Gemmata sp.	0	0	0	0	0	0	0	0	0	0	0	0	0	0	0	0	0	0	0	0	0	0	0	0	0	0	0	0	0	0	0	0	0	0	0	0	0	0	0	0	0
1101:27022:23394__S_063	Bacteria		Planctomycetes	Planctomycetia	Planctomycetales	Gemmataceae	Gemmata	uncultured Gemmata sp.	0	0	0	0	0	0	0	0	0	0	0	0	0	0	0	0	0	0	0	0	0	0	0	0	0	0	0	0	0	0	0	0	0	0	0	0	0	0	0	0	0
1101:4757:14641__S_043	Bacteria		Planctomycetes	Planctomycetia	Planctomycetales	Gemmataceae	Gemmata	uncultured Gemmata sp.	0	0	0	0	0	0	0	0	0	0	0	0	0	0	0	0	0	0	0	0	0	0	0	0	0	0	0	0	0	0	0	0	0	0	0	0	0	0	0	0	0
1101:5592:7240__S_121	Bacteria		Planctomycetes	Planctomycetia	Planctomycetales	Gemmataceae	Gemmata	uncultured Gemmata sp.	0	0	0	0	0	0	0	0	0	0	0	0	0	0	0	0	0	0	0	0	0	0	0	0	0	0	0	0	0	0	0	0	0	0	0	0	0	0	0	0	0
1101:9877:21298__S_046	Bacteria		Planctomycetes	Planctomycetia	Planctomycetales	Gemmataceae	Gemmata	uncultured Gemmata sp.	0	0	0	0	0	0	0	0	0	0	0	0	0	0	0	0	0	0	0	0	0	0	0	0	0	0	0	0	0	0	0	0	0	0	0	0	0	0	0	0	0
1102:12292:16695__S_027	Bacteria		Planctomycetes	Planctomycetia	Planctomycetales	Gemmataceae	Gemmata	uncultured Gemmata sp.	0	0	0	0	0	0	0	0	0	0	0	0	0	0	0	0	0	0	0	0	0	0	0	0	0	0	0	0	0	0	0	0	0	0	0	0	0	0	0	0	0
1102:14494:26011__S_128	Bacteria		Planctomycetes	Planctomycetia	Planctomycetales	Gemmataceae	Gemmata	uncultured Gemmata sp.	0	0	0	0	0	0	0	0	0	0	0	0	0	0	0	0	0	0	0	0	0	0	0	0	0	0	0	0	0	0	0	0	0	0	0	0	0	0	0	0	0
1102:16924:24588__S_081	Bacteria		Planctomycetes	Planctomycetia	Planctomycetales	Gemmataceae	Gemmata	uncultured Gemmata sp.	0	0	0	0	0	0	0	0	0	0	0	0	0	0	0	0	0	0	0	0	0	0	0	0	0	0	0	0	0	0	0	0	0	0	0	0	0	0	0	0	0
1102:17680:13927__R_057	Bacteria		Planctomycetes	Planctomycetia	Planctomycetales	Gemmataceae	Gemmata	uncultured Gemmata sp.	0	0	0	0	0	1	0	0	0	0	0	0	0	0	0	3	21	0	0	0	0	0	0	0	0	0	0	0	2	0	0	2	0	0	0	0	0	0	0	0	0
1102:18595:26327__S_028	Bacteria		Planctomycetes	Planctomycetia	Planctomycetales	Gemmataceae	Gemmata	uncultured Gemmata sp.	0	0	0	0	0	0	0	0	0	0	0	0	0	0	0	0	0	0	0	0	0	0	0	0	0	0	0	0	0	0	0	0	0	0	0	0	0	0	0	0	0
1102:22380:5830__R_131	Bacteria		Planctomycetes	Planctomycetia	Planctomycetales	Gemmataceae	Gemmata	uncultured Gemmata sp.	0	0	0	0	0	1	0	0	0	0	0	0	0	0	0	0	0	0	1	0	0	0	0	0	0	0	0	0	0	0	0	0	0	0	0	8	0	0	0	0	0
1102:23886:10182__S_127	Bacteria		Planctomycetes	Planctomycetia	Planctomycetales	Gemmataceae	Gemmata	uncultured Gemmata sp.	0	0	0	0	0	0	0	0	0	0	0	0	0	0	0	0	0	0	0	0	0	0	0	0	0	0	0	0	0	0	0	0	0	0	0	0	0	0	0	0	0
1102:5101:8609__S_073	Bacteria		Planctomycetes	Planctomycetia	Planctomycetales	Gemmataceae	Gemmata	uncultured Gemmata sp.	0	0	0	0	0	0	0	0	0	0	0	0	0	0	0	0	0	0	0	0	0	0	0	0	0	0	0	0	0	0	0	0	0	0	0	0	0	0	0	0	0
1103:11877:17000__S_095	Bacteria		Planctomycetes	Planctomycetia	Planctomycetales	Gemmataceae	Gemmata	uncultured Gemmata sp.	0	0	0	0	0	0	0	0	0	0	0	0	0	0	0	0	0	0	0	0	0	0	0	0	0	0	0	0	0	0	0	0	0	0	0	0	0	0	0	0	0
1103:13304:17189__R_121	Bacteria		Planctomycetes	Planctomycetia	Planctomycetales	Gemmataceae	Gemmata	uncultured Gemmata sp.	0	0	0	0	0	0	0	0	0	0	0	0	0	0	0	0	0	0	0	0	0	0	0	0	0	0	0	0	0	0	0	0	0	0	0	0	0	0	0	0	0
1103:19333:21746__R_114	Bacteria		Planctomycetes	Planctomycetia	Planctomycetales	Gemmataceae	Gemmata	uncultured Gemmata sp.	0	0	0	0	0	0	0	0	0	0	0	0	0	0	0	0	0	0	0	0	0	0	0	0	0	0	0	0	0	0	0	0	0	0	0	0	0	0	0	0	0
1103:21333:15368__S_028	Bacteria		Planctomycetes	Planctomycetia	Planctomycetales	Gemmataceae	Gemmata	uncultured Gemmata sp.	0	0	0	0	0	0	0	0	0	0	0	0	0	0	0	0	0	0	0	0	0	0	0	0	0	0	0	0	0	0	0	0	0	0	0	0	0	0	0	0	0
1103:9635:7772__S_055	Bacteria		Planctomycetes	Planctomycetia	Planctomycetales	Gemmataceae	Gemmata	uncultured Gemmata sp.	0	0	0	0	0	0	0	0	0	0	0	0	0	0	0	0	0	0	0	0	0	0	0	0	0	0	0	0	0	0	0	0	0	0	0	0	0	0	0	0	0
1104:11438:2793__R_103	Bacteria		Planctomycetes	Planctomycetia	Planctomycetales	Gemmataceae	Gemmata	uncultured Gemmata sp.	0	0	0	0	0	0	0	0	0	0	0	0	0	0	0	0	0	0	0	0	0	0	0	0	0	0	0	0	0	0	0	0	0	0	0	0	0	0	0	0	0
1104:16204:10220__S_021	Bacteria		Planctomycetes	Planctomycetia	Planctomycetales	Gemmataceae	Gemmata	uncultured Gemmata sp.	0	0	0	0	0	0	0	0	0	0	0	0	0	0	0	0	0	0	0	0	0	0	0	0	0	0	0	0	0	0	0	0	0	0	0	0	0	0	0	0	0
1104:16750:11870__S_068	Bacteria		Planctomycetes	Planctomycetia	Planctomycetales	Gemmataceae	Gemmata	uncultured Gemmata sp.	0	0	0	0	0	0	0	0	0	0	0	0	0	0	0	0	0	0	0	0	0	0	0	0	0	0	0	0	0	0	0	0	0	0	0	0	0	0	0	0	0
1104:17352:26862__R_047	Bacteria		Planctomycetes	Planctomycetia	Planctomycetales	Gemmataceae	Gemmata	uncultured Gemmata sp.	0	0	0	0	0	0	0	0	0	0	0	0	1	0	0	0	0	0	0	0	0	0	0	0	0	0	0	0	0	0	0	0	0	0	0	0	0	0	0	0	0
1104:18180:24395__S_061	Bacteria		Planctomycetes	Planctomycetia	Planctomycetales	Gemmataceae	Gemmata	uncultured Gemmata sp.	0	0	0	0	0	0	0	0	0	0	0	0	0	0	0	0	0	0	0	0	0	0	0	0	0	0	0	0	0	0	0	0	0	0	0	0	0	0	0	0	0
1104:20336:11353__S_038	Bacteria		Planctomycetes	Planctomycetia	Planctomycetales	Gemmataceae	Gemmata	uncultured Gemmata sp.	0	0	0	0	0	0	0	0	0	0	0	0	0	0	0	0	0	0	0	0	0	0	0	0	0	0	0	0	0	0	0	0	0	0	0	0	0	0	0	0	0
1104:25881:20521__S_087	Bacteria		Planctomycetes	Planctomycetia	Planctomycetales	Gemmataceae	Gemmata	uncultured Gemmata sp.	0	0	0	0	0	0	0	0	0	0	0	0	0	0	0	0	0	0	0	0	0	0	0	0	0	0	0	0	0	0	0	0	0	0	0	0	0	0	0	0	0
1104:4898:12829__R_034	Bacteria		Planctomycetes	Planctomycetia	Planctomycetales	Gemmataceae	Gemmata	uncultured Gemmata sp.	0	0	0	0	0	0	0	0	0	0	0	0	0	0	0	0	0	0	0	0	0	0	0	0	0	0	0	0	0	0	0	0	0	8	0	0	0	0	0	0	0
1104:9224:13723__R_069	Bacteria		Planctomycetes	Planctomycetia	Planctomycetales	Gemmataceae	Gemmata	uncultured Gemmata sp.	0	0	0	0	0	0	0	0	0	0	0	0	0	0	0	0	0	0	0	0	0	1	0	0	0	0	0	0	0	0	0	0	0	0	0	0	0	0	0	0	0
1104:9845:27501__S_048	Bacteria		Planctomycetes	Planctomycetia	Planctomycetales	Gemmataceae	Gemmata	uncultured Gemmata sp.	0	0	0	0	0	0	0	0	0	0	0	0	0	0	0	0	0	0	0	0	0	0	0	0	0	0	0	0	0	0	0	0	0	0	0	0	0	0	0	0	0
2101:15004:21145__R_015	Bacteria		Planctomycetes	Planctomycetia	Planctomycetales	Gemmataceae	Gemmata	uncultured Gemmata sp.	0	0	1	0	0	0	0	0	0	0	0	0	0	0	13	0	0	0	0	0	0	0	0	0	0	0	0	0	0	0	0	0	0	0	0	0	0	0	0	0	0
2101:17253:8756__R_050	Bacteria		Planctomycetes	Planctomycetia	Planctomycetales	Gemmataceae	Gemmata	uncultured Gemmata sp.	0	0	0	0	0	0	0	0	0	0	0	0	0	0	0	0	0	0	0	0	0	0	0	0	0	0	0	0	0	0	0	0	0	0	0	0	0	0	0	0	0
2101:18951:13693__S_130	Bacteria		Planctomycetes	Planctomycetia	Planctomycetales	Gemmataceae	Gemmata	uncultured Gemmata sp.	0	0	0	0	0	0	0	0	0	0	0	0	0	0	0	0	0	0	0	0	0	0	0	0	0	0	0	0	0	0	0	0	0	0	0	0	0	0	0	0	0
2102:10221:14567__S_093	Bacteria		Planctomycetes	Planctomycetia	Planctomycetales	Gemmataceae	Gemmata	uncultured Gemmata sp.	0	0	0	0	0	0	0	0	0	0	0	0	0	0	0	0	0	0	0	0	0	0	0	0	0	0	0	0	0	0	0	0	0	0	0	0	0	0	0	0	0
2102:15131:24408__R_131	Bacteria		Planctomycetes	Planctomycetia	Planctomycetales	Gemmataceae	Gemmata	uncultured Gemmata sp.	0	0	0	0	0	0	0	0	0	0	0	0	0	0	0	0	0	0	0	0	0	0	0	0	0	0	0	0	0	0	0	0	0	0	0	0	0	0	0	0	0
2102:9923:16402__R_118	Bacteria		Planctomycetes	Planctomycetia	Planctomycetales	Gemmataceae	Gemmata	uncultured Gemmata sp.	0	0	0	0	0	0	0	0	0	0	0	0	0	0	0	0	0	0	0	0	0	0	0	0	0	0	0	0	0	0	0	0	0	0	0	0	0	0	0	0	0
2103:12760:13135__S_058	Bacteria		Planctomycetes	Planctomycetia	Planctomycetales	Gemmataceae	Gemmata	uncultured Gemmata sp.	0	0	0	0	0	0	0	0	0	0	0	0	0	0	0	0	0	0	0	0	0	0	0	0	0	0	0	0	0	0	0	0	0	0	0	0	0	0	0	0	0
2104:16099:3607__R_035	Bacteria		Planctomycetes	Planctomycetia	Planctomycetales	Gemmataceae	Gemmata	uncultured Gemmata sp.	0	0	0	0	0	0	0	0	0	0	0	0	0	0	0	0	0	0	0	0	0	0	0	0	0	0	0	0	0	0	0	0	0	0	14	0	0	0	0	0	0
2104:21976:17799__S_042	Bacteria		Planctomycetes	Planctomycetia	Planctomycetales	Gemmataceae	Gemmata	uncultured Gemmata sp.	0	0	0	0	0	0	0	0	0	0	0	0	0	0	0	0	0	0	0	0	0	0	0	0	0	0	0	0	0	0	0	0	0	0	0	0	0	0	0	0	0
2104:26220:18503__S_011	Bacteria		Planctomycetes	Planctomycetia	Planctomycetales	Gemmataceae	Gemmata	uncultured Gemmata sp.	0	0	0	0	2	0	0	0	0	0	0	0	3	0	0	1	0	0	0	0	0	0	0	0	0	0	0	1	0	0	0	0	0	0	0	0	1	0	0	0	0
2104:27084:17284__R_096	Bacteria		Planctomycetes	Planctomycetia	Planctomycetales	Gemmataceae	Gemmata	uncultured Gemmata sp.	0	0	0	0	0	0	0	0	0	0	0	0	0	0	0	0	0	0	0	0	0	0	0	0	0	0	0	0	0	0	0	0	0	0	0	0	0	0	0	0	0
1101:11819:12118__R_016	Bacteria		Planctomycetes	Planctomycetia	Planctomycetales	Gemmataceae	Gemmata		0	31	4	1	2	4	1	0	0	3	0	0	35	16	18	78	0	0	6	8	0	0	13	1	1	0	5	0	0	5	0	0	6	0	0	33	0	0	0	23	0
1101:13315:13357__S_111	Bacteria		Planctomycetes	Planctomycetia	Planctomycetales	Gemmataceae	Gemmata		0	0	0	0	0	0	0	0	0	0	0	0	0	0	0	0	0	0	0	0	0	0	0	0	0	0	0	0	0	0	0	0	0	0	0	0	0	0	0	0	0
1102:17133:26940__R_122	Bacteria		Planctomycetes	Planctomycetia	Planctomycetales	Gemmataceae	Gemmata		0	0	0	0	0	0	0	0	0	0	0	0	0	0	0	0	0	0	0	0	0	0	0	0	0	0	0	0	0	0	0	0	0	0	0	0	0	0	0	0	0
1102:25654:16902__R_056	Bacteria		Planctomycetes	Planctomycetia	Planctomycetales	Gemmataceae	Gemmata		0	0	0	0	0	3	0	2	0	0	0	0	7	0	0	0	2	0	0	1	0	0	0	0	0	0	0	0	1	7	0	0	0	0	0	3	0	11	2	0	0
1102:2055:16784__R_099	Bacteria		Planctomycetes	Planctomycetia	Planctomycetales	Gemmataceae	Gemmata		0	0	0	0	2	0	0	0	0	0	0	0	0	4	0	0	0	0	0	0	0	0	0	0	0	0	0	0	0	0	0	0	0	0	0	0	0	0	0	0	0
1104:23212:18143__R_110	Bacteria		Planctomycetes	Planctomycetia	Planctomycetales	Gemmataceae	Gemmata		0	0	0	0	3	0	0	0	0	0	1	0	0	3	0	0	0	0	0	0	0	0	3	0	0	0	0	0	0	1	0	0	0	0	0	0	0	0	0	0	0
1101:11150:9127__R_057	Bacteria		Planctomycetes	Planctomycetia	Planctomycetales	Gemmataceae	Zavarzinella	uncultured Zavarzinella sp.	0	0	0	0	0	0	0	0	0	0	0	0	0	0	0	0	0	0	0	0	0	0	0	0	0	0	0	0	0	0	0	0	0	0	0	0	0	1	0	0	0
1101:13443:24243__R_104	Bacteria		Planctomycetes	Planctomycetia	Planctomycetales	Gemmataceae	Zavarzinella	uncultured Zavarzinella sp.	0	0	0	0	0	0	0	0	0	0	1	0	0	0	0	1	0	0	0	0	0	0	0	0	0	0	0	0	0	9	0	0	0	0	0	0	0	0	0	0	0
1101:13924:16965__R_104	Bacteria		Planctomycetes	Planctomycetia	Planctomycetales	Gemmataceae	Zavarzinella	uncultured Zavarzinella sp.	16	36	8	7	6	2	0	0	3	0	9	1	0	0	5	0	0	0	0	1	3	0	12	0	0	0	3	0	0	6	0	0	2	0	0	4	0	3	0	0	3
1102:11020:28023__S_024	Bacteria		Planctomycetes	Planctomycetia	Planctomycetales	Gemmataceae	Zavarzinella	uncultured Zavarzinella sp.	0	0	0	0	0	0	0	0	0	0	0	0	0	0	0	0	0	0	0	0	0	0	0	0	0	3	0	0	0	0	0	0	0	0	0	0	0	0	0	0	0
1102:18358:24902__S_038	Bacteria		Planctomycetes	Planctomycetia	Planctomycetales	Gemmataceae	Zavarzinella	uncultured Zavarzinella sp.	0	0	0	0	0	0	0	0	0	0	0	0	0	0	0	0	0	0	2	0	0	0	0	0	0	0	0	0	0	0	0	0	0	0	0	0	0	0	0	0	0
1102:20578:26925__S_048	Bacteria		Planctomycetes	Planctomycetia	Planctomycetales	Gemmataceae	Zavarzinella	uncultured Zavarzinella sp.	0	0	0	0	0	0	0	0	0	0	0	0	0	0	0	0	0	0	0	0	0	0	0	0	0	0	0	0	0	0	0	0	0	0	0	0	0	0	0	0	0
1102:23381:16087__S_128	Bacteria		Planctomycetes	Planctomycetia	Planctomycetales	Gemmataceae	Zavarzinella	uncultured Zavarzinella sp.	0	0	0	0	0	0	0	0	0	0	0	0	0	0	0	0	0	0	0	0	0	0	0	0	0	0	0	0	0	0	0	0	0	0	0	0	0	0	0	0	0
1101:12671:27392__R_066	Bacteria		Planctomycetes	Planctomycetia	Planctomycetales	Gemmataceae	Zavarzinella	uncultured Zavarzinella sp.	0	0	0	0	0	0	0	0	0	0	0	0	0	0	0	0	0	0	0	0	0	0	0	0	0	0	0	0	0	0	0	0	0	0	0	0	0	0	0	0	0
1102:10868:10885__S_079	Bacteria		Planctomycetes	Planctomycetia	Planctomycetales	Gemmataceae	Zavarzinella	uncultured Zavarzinella sp.	0	0	8	0	0	0	0	0	0	0	0	0	0	0	0	0	0	0	0	0	0	0	0	0	0	0	0	0	0	0	0	0	0	0	0	0	0	0	0	0	0
1102:13003:20262__R_057	Bacteria		Planctomycetes	Planctomycetia	Planctomycetales	Gemmataceae	Zavarzinella	uncultured Zavarzinella sp.	0	0	0	0	0	0	0	0	0	0	0	0	1	1	0	0	0	0	0	0	0	0	0	0	0	0	1	0	0	0	0	0	0	0	3	5	0	0	0	0	0
1102:4331:18074__R_114	Bacteria		Planctomycetes	Planctomycetia	Planctomycetales	Gemmataceae	Zavarzinella	uncultured Zavarzinella sp.	0	0	0	0	0	0	0	0	0	0	0	0	0	0	0	0	0	0	0	0	0	0	0	0	0	0	0	0	0	0	0	0	0	0	0	0	0	0	0	0	0
1103:10447:5174__R_052	Bacteria		Planctomycetes	Planctomycetia	Planctomycetales	Gemmataceae	Zavarzinella	uncultured Zavarzinella sp.	0	0	6	0	0	0	0	0	0	0	0	0	0	0	0	0	0	0	0	0	0	0	0	0	0	0	0	0	0	0	0	0	0	0	0	0	0	0	0	0	0
1103:18573:28485__S_070	Bacteria		Planctomycetes	Planctomycetia	Planctomycetales	Gemmataceae	Zavarzinella	uncultured Zavarzinella sp.	0	0	0	0	0	0	0	0	0	0	0	0	0	0	0	0	0	0	0	0	0	0	0	0	0	0	0	0	0	0	0	0	0	0	0	0	0	0	0	2	0
1103:18753:20476__R_075	Bacteria		Planctomycetes	Planctomycetia	Planctomycetales	Gemmataceae	Zavarzinella	uncultured Zavarzinella sp.	0	0	0	0	0	0	0	0	0	0	0	0	0	0	0	0	0	0	0	0	0	0	0	0	0	0	0	0	0	0	0	0	0	0	0	0	0	0	0	5	0
1103:28865:14489__R_007	Bacteria		Planctomycetes	Planctomycetia	Planctomycetales	Gemmataceae	Zavarzinella	uncultured Zavarzinella sp.	0	0	0	0	0	0	16	0	0	0	0	0	0	0	0	0	0	0	0	0	0	0	0	0	0	0	0	0	0	0	0	0	0	0	3	0	0	0	0	0	0
1104:18646:13832__S_087	Bacteria		Planctomycetes	Planctomycetia	Planctomycetales	Gemmataceae	Zavarzinella	uncultured Zavarzinella sp.	0	0	0	0	0	0	0	0	0	0	0	0	0	0	0	0	0	0	0	0	0	0	0	0	0	0	0	0	0	0	0	0	0	0	0	0	0	0	0	0	0
2101:11025:23481__S_102	Bacteria		Planctomycetes	Planctomycetia	Planctomycetales	Gemmataceae	Zavarzinella	uncultured Zavarzinella sp.	0	0	0	0	0	0	0	0	0	0	0	0	0	0	0	0	2	0	0	0	0	0	0	0	0	0	0	0	0	0	0	0	0	0	0	0	0	0	0	0	0
2101:8928:20465__R_016	Bacteria		Planctomycetes	Planctomycetia	Planctomycetales	Gemmataceae	Zavarzinella	uncultured Zavarzinella sp.	0	0	1	0	6	0	0	0	0	0	0	1	1	0	0	4	3	2	0	0	0	0	0	0	0	0	0	0	1	0	0	0	4	0	0	0	0	0	0	0	0
2103:13417:15354__S_014	Bacteria		Planctomycetes	Planctomycetia	Planctomycetales	Gemmataceae	Zavarzinella	uncultured Zavarzinella sp.	0	0	1	0	0	0	0	0	0	0	0	0	0	0	0	0	0	0	0	0	0	0	0	0	0	0	0	0	0	0	0	0	0	0	0	0	0	0	0	0	0
1101:11753:8964__R_034	Bacteria		Planctomycetes	Planctomycetia	Planctomycetales	Gemmataceae			0	33	5	16	5	4	2	14	4	0	1	3	2	0	15	8	0	8	0	7	0	1	12	1	0	8	0	0	0	1	0	0	0	15	0	4	0	0	0	0	0
1101:14144:18836__R_008	Bacteria		Planctomycetes	Planctomycetia	Planctomycetales	Gemmataceae			0	0	0	0	0	0	0	34	11	1	2	0	3	2	9	4	0	0	0	0	0	0	0	1	7	0	0	0	0	0	0	0	0	0	1	0	0	20	0	1	0
1101:14759:25486__S_117	Bacteria		Planctomycetes	Planctomycetia	Planctomycetales	Gemmataceae			0	0	0	0	0	0	0	0	0	0	0	0	0	0	0	0	0	0	0	0	0	0	2	0	0	0	0	0	0	0	0	0	0	0	0	0	0	0	0	0	0
1101:16712:28555__S_006	Bacteria		Planctomycetes	Planctomycetia	Planctomycetales	Gemmataceae			0	0	0	0	0	0	0	0	0	0	0	0	0	0	0	0	0	0	0	0	0	0	0	0	0	0	0	0	0	0	0	0	0	0	0	0	0	0	0	0	0
1101:17142:11254__S_013	Bacteria		Planctomycetes	Planctomycetia	Planctomycetales	Gemmataceae			0	0	0	0	0	0	0	0	0	0	0	0	0	0	0	0	0	0	0	0	0	0	0	0	0	0	0	0	0	0	0	0	0	0	0	0	0	0	0	0	0
1101:17290:8795__R_080	Bacteria		Planctomycetes	Planctomycetia	Planctomycetales	Gemmataceae			0	0	0	0	0	0	0	1	0	0	0	0	0	0	0	0	0	0	0	0	0	0	0	0	0	0	0	0	0	2	0	0	1	0	0	0	0	0	0	0	2
1101:20448:3031__R_038	Bacteria		Planctomycetes	Planctomycetia	Planctomycetales	Gemmataceae			0	0	0	0	0	0	0	0	0	0	0	0	0	0	0	0	0	0	0	0	0	0	0	0	0	0	0	0	0	1	0	0	0	0	0	0	0	11	0	0	0
1101:22170:15578__R_099	Bacteria		Planctomycetes	Planctomycetia	Planctomycetales	Gemmataceae			17	0	0	0	6	0	0	0	0	0	0	0	0	0	0	0	0	0	0	0	0	0	0	0	0	0	0	0	0	0	0	0	0	0	0	0	0	0	0	0	0
1101:8521:9933__S_002	Bacteria		Planctomycetes	Planctomycetia	Planctomycetales	Gemmataceae			0	0	0	0	0	0	0	0	0	0	0	0	0	0	0	0	0	0	0	0	0	0	0	0	0	0	0	0	0	0	0	0	0	0	0	0	0	0	0	0	0
1101:9121:22273__R_040	Bacteria		Planctomycetes	Planctomycetia	Planctomycetales	Gemmataceae			0	0	20	0	1	0	1	50	6	6	0	3	0	1	5	43	3	1	0	0	0	5	6	0	0	8	0	9	0	1	0	1	21	10	0	0	0	0	0	58	1
1101:9162:19833__S_007	Bacteria		Planctomycetes	Planctomycetia	Planctomycetales	Gemmataceae			0	0	0	0	0	0	0	0	0	0	0	0	0	0	0	0	0	0	0	0	0	0	0	0	0	0	0	0	0	0	0	0	0	0	0	0	0	0	0	0	0
1102:19230:26664__S_051	Bacteria		Planctomycetes	Planctomycetia	Planctomycetales	Gemmataceae			0	0	0	0	0	0	0	0	0	0	0	0	0	0	0	0	0	0	0	0	0	0	0	0	0	0	0	0	0	0	0	0	0	0	0	0	0	0	0	0	0
1102:20143:18667__R_081	Bacteria		Planctomycetes	Planctomycetia	Planctomycetales	Gemmataceae			1	0	0	0	1	2	0	0	0	0	0	0	0	0	0	0	0	0	0	0	0	0	0	0	0	0	0	0	0	0	0	0	0	0	0	0	0	0	0	0	0
1102:24837:13197__R_014	Bacteria		Planctomycetes	Planctomycetia	Planctomycetales	Gemmataceae			0	0	0	0	0	0	0	0	0	0	0	0	0	3	0	0	0	0	0	0	0	0	0	0	0	0	0	0	0	0	0	0	0	0	0	0	0	0	0	0	0
1102:27679:16816__S_088	Bacteria		Planctomycetes	Planctomycetia	Planctomycetales	Gemmataceae			0	0	0	0	0	0	0	0	0	0	0	0	0	0	0	0	0	0	0	0	0	0	0	0	0	0	0	0	0	0	0	0	0	0	0	0	0	0	0	0	0
1101:10023:26948__S_096	Bacteria		Planctomycetes	Planctomycetia	Planctomycetales	Gemmataceae			0	0	0	0	0	0	0	0	0	0	0	0	0	0	0	0	0	0	0	0	0	0	0	0	0	0	0	0	0	0	0	0	0	0	0	0	0	0	0	0	0
1101:21838:9402__S_087	Bacteria		Planctomycetes	Planctomycetia	Planctomycetales	Gemmataceae			0	0	0	0	0	0	0	0	0	0	0	0	0	0	0	0	0	0	0	0	0	0	0	0	0	0	0	0	0	0	0	0	0	0	0	0	0	0	0	0	0
1101:23484:18881__S_082	Bacteria		Planctomycetes	Planctomycetia	Planctomycetales	Gemmataceae			0	0	0	0	0	0	0	0	0	0	0	0	0	0	0	0	0	0	0	0	0	0	0	0	0	0	0	0	0	0	0	0	0	0	0	0	0	0	0	0	0
1101:28688:19452__S_013	Bacteria		Planctomycetes	Planctomycetia	Planctomycetales	Gemmataceae			0	0	0	0	0	0	0	0	0	0	0	0	0	0	0	0	0	0	0	0	0	0	0	0	0	0	0	0	0	0	0	0	0	0	0	0	0	0	0	0	0
1101:6385:11440__R_003	Bacteria		Planctomycetes	Planctomycetia	Planctomycetales	Gemmataceae			0	0	13	0	0	0	4	0	0	0	0	0	0	0	0	0	0	0	0	0	0	0	0	0	0	0	0	0	0	0	0	0	0	1	0	0	0	0	0	0	0
1101:7309:5350__S_081	Bacteria		Planctomycetes	Planctomycetia	Planctomycetales	Gemmataceae			0	0	0	0	0	0	0	0	0	0	0	0	0	0	0	0	0	0	0	0	0	0	0	0	0	0	0	0	0	0	0	0	0	0	0	0	0	0	0	0	0
1102:4143:16389__R_040	Bacteria		Planctomycetes	Planctomycetia	Planctomycetales	Gemmataceae			0	0	1	0	0	0	0	0	0	0	0	0	0	0	0	0	0	0	0	0	0	0	0	0	0	0	0	0	0	0	0	0	0	0	0	0	0	0	0	9	0
1102:4779:17543__S_062	Bacteria		Planctomycetes	Planctomycetia	Planctomycetales	Gemmataceae			0	0	0	0	0	0	0	0	0	0	0	0	0	0	0	0	0	0	0	0	0	0	0	0	0	0	0	0	0	0	0	0	0	0	0	0	0	0	0	0	0
1103:12215:23440__R_006	Bacteria		Planctomycetes	Planctomycetia	Planctomycetales	Gemmataceae			0	0	0	1	0	4	0	0	0	0	0	0	0	0	0	0	0	0	0	1	0	0	1	0	0	0	0	0	0	0	0	0	1	0	0	0	0	0	0	0	0
1103:17220:20062__S_021	Bacteria		Planctomycetes	Planctomycetia	Planctomycetales	Gemmataceae			0	0	0	0	0	0	0	0	0	0	0	0	0	0	0	0	0	0	0	0	0	0	0	0	0	0	0	0	0	0	0	0	0	0	0	0	0	0	0	0	0
1103:18732:11970__S_063	Bacteria		Planctomycetes	Planctomycetia	Planctomycetales	Gemmataceae			0	0	0	0	0	0	0	0	0	0	0	0	0	0	0	0	0	0	0	0	0	0	0	0	0	0	0	0	0	0	0	0	0	0	0	0	0	0	0	0	0
1103:24469:25658__R_123	Bacteria		Planctomycetes	Planctomycetia	Planctomycetales	Gemmataceae			0	0	0	0	0	0	0	0	0	0	0	0	0	0	0	0	0	0	0	0	0	0	1	0	0	0	0	0	0	0	0	0	0	0	0	0	0	0	0	0	0
1103:5016:18696__R_002	Bacteria		Planctomycetes	Planctomycetia	Planctomycetales	Gemmataceae			0	15	0	0	0	0	0	0	0	0	0	0	0	0	0	0	0	0	0	0	0	0	0	0	0	0	0	0	0	0	0	0	0	0	0	0	0	0	0	0	0
1104:12356:8349__R_117	Bacteria		Planctomycetes	Planctomycetia	Planctomycetales	Gemmataceae			0	0	0	0	0	0	0	0	0	0	0	0	0	0	0	0	0	0	0	0	0	0	0	0	0	0	0	0	0	0	0	0	0	0	0	0	0	0	0	0	0
1104:17757:12172__R_080	Bacteria		Planctomycetes	Planctomycetia	Planctomycetales	Gemmataceae			0	0	0	0	0	0	0	0	0	0	0	0	0	0	0	0	0	0	0	0	0	0	0	0	0	0	0	0	0	0	0	0	0	0	0	0	0	1	0	0	0
1104:23278:23545__S_126	Bacteria		Planctomycetes	Planctomycetia	Planctomycetales	Gemmataceae			0	0	0	0	0	0	0	0	0	0	0	0	0	0	0	0	0	0	0	0	0	0	0	0	0	0	0	0	0	0	0	0	0	0	0	0	0	0	0	0	0
2101:11153:15823__R_095	Bacteria		Planctomycetes	Planctomycetia	Planctomycetales	Gemmataceae			0	0	0	0	0	0	0	0	0	0	0	0	0	0	0	0	0	0	0	0	0	0	0	0	0	0	0	0	0	0	0	0	0	0	0	0	0	0	0	0	0
2101:20694:16809__R_072	Bacteria		Planctomycetes	Planctomycetia	Planctomycetales	Gemmataceae			0	0	0	0	0	0	0	0	0	0	0	0	0	0	0	0	0	0	0	0	0	0	0	0	0	0	0	0	0	0	0	0	0	0	0	0	0	0	0	0	0
2103:13363:13449__S_042	Bacteria		Planctomycetes	Planctomycetia	Planctomycetales	Gemmataceae			0	0	0	0	0	0	0	0	0	0	0	0	0	0	0	0	0	0	0	0	0	0	0	0	0	0	0	0	0	0	0	0	0	0	0	0	0	0	0	0	0
2104:4465:19525__S_066	Bacteria		Planctomycetes	Planctomycetia	Planctomycetales	Gemmataceae			0	0	0	0	0	0	0	0	0	0	0	0	0	0	0	0	0	0	0	0	0	0	0	0	0	0	0	0	0	2	0	0	0	0	0	0	0	0	0	0	0
1101:11903:11627__R_057	Bacteria		Planctomycetes	Planctomycetia	Planctomycetales	Isosphaeraceae	Isosphaera	uncultured Isosphaera sp.	0	0	11	0	0	0	0	0	0	0	0	0	0	0	0	0	0	0	0	0	0	0	0	0	0	0	0	0	0	0	0	0	0	0	0	0	0	0	0	0	0
1103:14470:8871__R_116	Bacteria		Planctomycetes	Planctomycetia	Planctomycetales	Isosphaeraceae	Isosphaera	uncultured Isosphaera sp.	0	7	0	0	0	0	0	0	0	0	0	0	3	0	0	0	0	0	0	0	0	0	0	0	0	0	0	0	0	0	0	0	0	0	0	0	0	3	0	0	7
1101:10404:25788__R_024	Bacteria		Planctomycetes	Planctomycetia	Planctomycetales	Isosphaeraceae	Singulisphaera	uncultured Singulisphaera sp.	0	0	36	5	15	7	4	26	0	3	0	2	0	12	2	4	0	0	0	1	1	0	19	311	49	6	12	0	1	15	0	3	0	6	29	0	0	6	10	0	1
1101:10656:25425__R_041	Bacteria		Planctomycetes	Planctomycetia	Planctomycetales	Isosphaeraceae	Singulisphaera	uncultured Singulisphaera sp.	0	0	0	0	0	0	0	0	0	0	0	0	0	0	0	0	0	0	0	0	0	0	0	0	0	0	0	0	0	0	0	0	0	0	0	0	0	0	0	0	3
1101:11310:28333__R_097	Bacteria		Planctomycetes	Planctomycetia	Planctomycetales	Isosphaeraceae	Singulisphaera	uncultured Singulisphaera sp.	0	0	0	0	0	0	0	0	0	0	0	0	0	0	0	0	0	0	0	0	0	0	0	0	0	0	0	0	0	3	0	0	0	0	0	0	0	0	0	0	0
1101:11979:24213__S_079	Bacteria		Planctomycetes	Planctomycetia	Planctomycetales	Isosphaeraceae	Singulisphaera	uncultured Singulisphaera sp.	0	0	0	0	0	0	0	0	0	0	0	0	0	0	0	0	1	0	0	0	0	0	1	0	0	0	1	0	0	0	0	0	0	1	0	0	0	0	0	0	1
1101:12259:9386__R_019	Bacteria		Planctomycetes	Planctomycetia	Planctomycetales	Isosphaeraceae	Singulisphaera	uncultured Singulisphaera sp.	0	0	0	0	0	2	0	0	0	0	0	0	2	0	0	0	0	0	85	0	1	0	0	0	0	0	0	0	0	0	0	0	1	0	0	0	0	0	0	0	0
1101:12710:27785__S_006	Bacteria		Planctomycetes	Planctomycetia	Planctomycetales	Isosphaeraceae	Singulisphaera	uncultured Singulisphaera sp.	16	0	0	7	0	2	0	0	0	0	3	0	2	1	0	0	6	2	0	0	0	0	0	0	0	0	17	0	1	2	0	0	0	0	0	12	0	0	0	0	0
1101:12904:2454__R_041	Bacteria		Planctomycetes	Planctomycetia	Planctomycetales	Isosphaeraceae	Singulisphaera	uncultured Singulisphaera sp.	4	0	0	7	0	7	0	0	0	0	1	0	1	0	0	0	0	0	0	1	2	0	0	0	0	0	0	0	0	0	0	0	0	13	20	0	0	15	0	0	15
1101:13076:6804__R_025	Bacteria		Planctomycetes	Planctomycetia	Planctomycetales	Isosphaeraceae	Singulisphaera	uncultured Singulisphaera sp.	0	0	8	1	16	9	1	0	0	0	0	3	10	3	4	0	0	0	70	3	0	0	5	0	87	0	0	0	0	10	18	0	3	28	0	2	0	3	12	0	2
1101:13340:13158__R_001	Bacteria		Planctomycetes	Planctomycetia	Planctomycetales	Isosphaeraceae	Singulisphaera	uncultured Singulisphaera sp.	13	0	0	0	0	1	0	0	0	0	1	0	0	1	0	0	0	0	0	0	0	0	0	0	0	0	0	0	0	0	0	0	0	1	0	0	0	0	0	0	0
1101:13633:22982__R_041	Bacteria		Planctomycetes	Planctomycetia	Planctomycetales	Isosphaeraceae	Singulisphaera	uncultured Singulisphaera sp.	0	0	1	1	0	0	0	0	0	0	0	0	0	0	0	0	0	0	0	0	0	0	0	0	0	0	7	0	0	0	0	0	0	5	0	0	0	0	0	0	8
1101:14260:10655__R_128	Bacteria		Planctomycetes	Planctomycetia	Planctomycetales	Isosphaeraceae	Singulisphaera	uncultured Singulisphaera sp.	3	0	6	8	6	2	33	3	0	0	3	1	8	0	8	2	16	0	2	4	1	0	10	0	0	4	23	0	0	21	0	9	0	0	0	0	1	9	0	0	18
1101:14498:12211__R_116	Bacteria		Planctomycetes	Planctomycetia	Planctomycetales	Isosphaeraceae	Singulisphaera	uncultured Singulisphaera sp.	0	0	0	0	0	0	0	0	0	0	0	0	0	1	0	0	0	0	0	0	0	0	0	0	0	0	0	0	0	0	0	0	0	0	0	0	0	0	0	0	0
1101:15022:9929__S_093	Bacteria		Planctomycetes	Planctomycetia	Planctomycetales	Isosphaeraceae	Singulisphaera	uncultured Singulisphaera sp.	0	0	0	0	0	0	0	0	0	0	0	0	0	0	0	0	0	0	0	0	0	0	0	0	0	0	0	0	0	0	0	0	0	0	0	0	0	0	0	0	0
1101:15343:3878__S_044	Bacteria		Planctomycetes	Planctomycetia	Planctomycetales	Isosphaeraceae	Singulisphaera	uncultured Singulisphaera sp.	0	0	0	0	0	0	0	0	0	0	0	0	0	0	0	0	0	0	0	0	0	0	0	0	0	0	0	0	0	0	0	0	0	0	0	0	0	0	0	0	0
1101:15423:13678__R_030	Bacteria		Planctomycetes	Planctomycetia	Planctomycetales	Isosphaeraceae	Singulisphaera	uncultured Singulisphaera sp.	0	0	0	0	0	0	0	0	0	0	0	0	0	0	0	0	0	0	0	0	0	0	0	0	0	0	0	0	0	11	0	0	0	0	0	0	0	0	0	0	0
1101:15470:17714__R_103	Bacteria		Planctomycetes	Planctomycetia	Planctomycetales	Isosphaeraceae	Singulisphaera	uncultured Singulisphaera sp.	24	0	0	0	0	0	0	0	0	0	0	1	2	0	0	0	3	0	16	0	0	0	2	0	0	0	0	0	0	0	0	0	0	0	0	1	0	0	0	0	3
1101:16223:9330__S_021	Bacteria		Planctomycetes	Planctomycetia	Planctomycetales	Isosphaeraceae	Singulisphaera	uncultured Singulisphaera sp.	0	0	0	0	1	0	0	0	0	0	1	1	0	0	0	0	0	0	0	0	0	0	0	0	0	0	0	0	0	0	0	0	0	0	0	0	0	0	0	0	0
1101:16807:5017__S_048	Bacteria		Planctomycetes	Planctomycetia	Planctomycetales	Isosphaeraceae	Singulisphaera	uncultured Singulisphaera sp.	0	0	0	0	2	0	0	0	0	0	0	0	0	1	0	0	2	0	0	0	0	0	0	0	0	0	0	0	0	2	0	0	0	0	0	0	0	0	0	0	0
1101:16955:24783__R_104	Bacteria		Planctomycetes	Planctomycetia	Planctomycetales	Isosphaeraceae	Singulisphaera	uncultured Singulisphaera sp.	0	0	0	0	0	0	0	0	0	0	0	0	0	0	0	2	10	1	0	0	0	0	0	6	0	0	0	0	0	0	0	0	0	0	13	0	0	0	0	0	6
1101:17265:15687__R_023	Bacteria		Planctomycetes	Planctomycetia	Planctomycetales	Isosphaeraceae	Singulisphaera	uncultured Singulisphaera sp.	0	0	1	0	2	0	0	0	0	0	0	0	0	0	0	0	0	0	0	0	0	0	41	0	0	0	1	0	0	0	0	0	0	0	0	5	0	0	9	0	1
1101:17363:25710__R_080	Bacteria		Planctomycetes	Planctomycetia	Planctomycetales	Isosphaeraceae	Singulisphaera	uncultured Singulisphaera sp.	1	0	0	1	2	0	0	1	0	0	1	0	1	1	16	6	0	0	0	0	0	0	1	0	0	1	0	0	0	1	0	0	0	0	4	2	0	0	0	0	0
1101:18292:13164__R_064	Bacteria		Planctomycetes	Planctomycetia	Planctomycetales	Isosphaeraceae	Singulisphaera	uncultured Singulisphaera sp.	0	0	0	0	0	0	0	0	0	0	0	0	0	0	0	0	0	0	0	0	0	0	0	0	0	0	0	0	0	0	0	0	0	0	0	0	0	0	0	0	0
1101:20887:9845__R_095	Bacteria		Planctomycetes	Planctomycetia	Planctomycetales	Isosphaeraceae	Singulisphaera	uncultured Singulisphaera sp.	0	0	0	0	0	0	0	0	1	0	0	0	0	0	0	0	17	0	0	0	0	0	0	0	0	0	0	0	0	0	0	0	0	0	0	0	0	0	0	0	0
1101:20994:14407__R_102	Bacteria		Planctomycetes	Planctomycetia	Planctomycetales	Isosphaeraceae	Singulisphaera	uncultured Singulisphaera sp.	0	0	7	0	0	0	0	0	0	0	0	0	0	0	1	0	0	0	0	0	0	0	0	0	0	0	9	0	0	0	0	0	0	0	0	0	0	0	0	0	0
1101:21412:4069__R_109	Bacteria		Planctomycetes	Planctomycetia	Planctomycetales	Isosphaeraceae	Singulisphaera	uncultured Singulisphaera sp.	0	0	0	0	0	0	0	0	0	0	0	0	0	5	0	0	0	0	0	0	0	0	0	0	0	0	0	0	0	0	0	0	0	0	0	0	0	0	0	0	0
1101:26209:9601__R_042	Bacteria		Planctomycetes	Planctomycetia	Planctomycetales	Isosphaeraceae	Singulisphaera	uncultured Singulisphaera sp.	0	0	0	0	0	0	0	0	0	0	0	0	0	0	0	0	0	0	0	0	0	0	1	0	0	0	0	0	0	0	0	0	0	0	0	0	0	0	0	0	0
1101:5700:23582__S_002	Bacteria		Planctomycetes	Planctomycetia	Planctomycetales	Isosphaeraceae	Singulisphaera	uncultured Singulisphaera sp.	0	0	0	0	0	0	0	0	0	0	0	0	0	0	0	4	0	0	0	0	0	0	0	0	0	0	0	0	0	0	0	0	2	0	0	0	0	0	0	0	0
1101:5792:21456__R_098	Bacteria		Planctomycetes	Planctomycetia	Planctomycetales	Isosphaeraceae	Singulisphaera	uncultured Singulisphaera sp.	12	0	0	0	0	1	0	0	0	0	0	0	0	0	0	0	0	0	0	0	0	0	0	0	0	0	0	0	0	0	0	0	0	0	0	0	0	0	0	0	0
1101:6353:16996__R_065	Bacteria		Planctomycetes	Planctomycetia	Planctomycetales	Isosphaeraceae	Singulisphaera	uncultured Singulisphaera sp.	0	0	0	0	0	6	0	0	1	0	0	0	1	1	0	0	0	0	0	0	0	0	0	0	0	0	0	0	0	0	0	0	0	0	0	0	1	15	0	3	0
1101:6612:15721__R_008	Bacteria		Planctomycetes	Planctomycetia	Planctomycetales	Isosphaeraceae	Singulisphaera	uncultured Singulisphaera sp.	4	0	6	0	1	0	0	16	0	0	0	0	0	0	0	0	0	0	0	0	0	0	0	0	0	0	0	0	0	0	0	0	0	0	0	0	0	0	0	0	0
1101:6624:21926__R_003	Bacteria		Planctomycetes	Planctomycetia	Planctomycetales	Isosphaeraceae	Singulisphaera	uncultured Singulisphaera sp.	0	0	9	0	0	0	0	0	0	0	1	0	0	0	0	0	0	0	0	0	0	0	0	0	0	0	0	0	0	0	0	0	0	0	0	0	1	0	0	0	0
1101:8497:25866__R_082	Bacteria		Planctomycetes	Planctomycetia	Planctomycetales	Isosphaeraceae	Singulisphaera	uncultured Singulisphaera sp.	0	0	0	0	0	9	2	0	0	1	7	0	0	0	0	0	8	0	0	0	0	0	0	0	0	0	0	0	0	0	0	0	0	3	0	3	0	24	0	0	0
1101:8992:9884__R_050	Bacteria		Planctomycetes	Planctomycetia	Planctomycetales	Isosphaeraceae	Singulisphaera	uncultured Singulisphaera sp.	0	0	0	0	6	0	0	0	0	0	0	0	0	0	0	0	0	0	0	0	0	0	0	0	0	0	1	0	0	0	0	0	0	0	0	0	0	0	0	0	0
1102:13577:5847__R_023	Bacteria		Planctomycetes	Planctomycetia	Planctomycetales	Isosphaeraceae	Singulisphaera	uncultured Singulisphaera sp.	0	0	0	0	4	0	0	0	0	0	0	0	0	0	0	0	0	0	0	0	0	0	36	0	0	0	0	0	0	0	0	0	0	0	0	0	0	0	0	0	0
1102:14068:24043__S_101	Bacteria		Planctomycetes	Planctomycetia	Planctomycetales	Isosphaeraceae	Singulisphaera	uncultured Singulisphaera sp.	0	0	0	0	1	0	0	0	0	0	0	0	3	0	3	0	0	0	0	0	0	0	0	0	0	0	0	0	0	0	0	0	0	0	0	0	0	0	0	0	0
1102:14187:6294__R_049	Bacteria		Planctomycetes	Planctomycetia	Planctomycetales	Isosphaeraceae	Singulisphaera	uncultured Singulisphaera sp.	0	0	0	0	1	0	0	0	0	0	0	0	0	0	0	14	0	0	0	0	1	0	8	0	0	0	0	0	1	0	0	0	0	3	0	0	0	0	0	0	0
1102:17622:7772__R_089	Bacteria		Planctomycetes	Planctomycetia	Planctomycetales	Isosphaeraceae	Singulisphaera	uncultured Singulisphaera sp.	0	0	0	0	0	0	0	0	0	0	0	0	0	0	0	0	0	0	0	0	0	0	0	0	0	0	0	0	0	0	0	0	0	0	0	0	0	0	0	0	0
1102:17848:2899__S_020	Bacteria		Planctomycetes	Planctomycetia	Planctomycetales	Isosphaeraceae	Singulisphaera	uncultured Singulisphaera sp.	0	0	0	0	0	0	0	0	0	0	0	1	0	0	0	0	2	0	0	0	0	0	0	0	5	0	0	0	0	8	0	0	0	0	0	0	0	13	0	0	0
1102:18001:6433__R_025	Bacteria		Planctomycetes	Planctomycetia	Planctomycetales	Isosphaeraceae	Singulisphaera	uncultured Singulisphaera sp.	0	2	1	2	0	1	0	0	0	0	1	0	1	0	0	0	0	0	0	0	0	0	0	0	82	0	0	0	4	1	0	0	0	0	0	1	0	0	0	40	2
1102:18236:5209__R_114	Bacteria		Planctomycetes	Planctomycetia	Planctomycetales	Isosphaeraceae	Singulisphaera	uncultured Singulisphaera sp.	0	0	0	2	0	1	0	0	0	0	0	0	0	0	0	0	0	0	0	0	0	0	0	0	0	0	0	0	0	0	0	0	0	0	1	0	0	0	0	0	4
1102:18644:21166__S_013	Bacteria		Planctomycetes	Planctomycetia	Planctomycetales	Isosphaeraceae	Singulisphaera	uncultured Singulisphaera sp.	0	0	0	0	0	0	0	0	0	0	0	0	0	0	8	0	0	0	0	0	0	0	0	0	0	0	0	0	1	0	0	0	0	0	0	0	0	0	0	0	0
1102:24552:7763__R_041	Bacteria		Planctomycetes	Planctomycetia	Planctomycetales	Isosphaeraceae	Singulisphaera	uncultured Singulisphaera sp.	1	1	0	0	0	0	0	0	0	0	0	0	0	0	0	0	1	0	0	0	0	0	0	0	0	0	0	0	0	0	0	0	0	0	0	0	0	0	0	0	8
1102:25271:23971__R_063	Bacteria		Planctomycetes	Planctomycetia	Planctomycetales	Isosphaeraceae	Singulisphaera	uncultured Singulisphaera sp.	0	0	0	0	0	0	0	0	0	0	0	1	0	0	0	0	0	0	0	0	0	0	0	0	0	0	0	0	0	0	0	0	0	0	0	0	0	0	0	0	0
1102:25717:12160__R_057	Bacteria		Planctomycetes	Planctomycetia	Planctomycetales	Isosphaeraceae	Singulisphaera	uncultured Singulisphaera sp.	15	0	1	3	14	19	4	2	0	3	12	5	2	13	9	46	32	10	0	0	0	0	10	14	21	1	32	0	1	26	0	0	9	16	2	12	1	28	3	5	1
1102:6801:15070__R_030	Bacteria		Planctomycetes	Planctomycetia	Planctomycetales	Isosphaeraceae	Singulisphaera	uncultured Singulisphaera sp.	0	0	0	0	0	0	0	0	0	0	0	0	1	0	0	0	0	0	0	0	0	0	0	0	0	0	0	0	0	24	0	0	0	0	0	0	0	0	0	0	0
1102:7244:9493__R_005	Bacteria		Planctomycetes	Planctomycetia	Planctomycetales	Isosphaeraceae	Singulisphaera	uncultured Singulisphaera sp.	0	0	3	0	5	0	0	0	0	0	0	0	0	0	0	0	0	0	0	0	0	0	0	0	0	0	0	0	0	0	0	0	0	0	0	0	0	0	0	0	0
1102:8000:20541__R_125	Bacteria		Planctomycetes	Planctomycetia	Planctomycetales	Isosphaeraceae	Singulisphaera	uncultured Singulisphaera sp.	0	0	8	0	1	0	2	11	0	0	0	1	0	31	4	0	0	0	0	0	0	0	0	0	0	0	0	0	0	2	0	0	0	0	0	0	0	0	0	0	0
1101:11448:11356__R_102	Bacteria		Planctomycetes	Planctomycetia	Planctomycetales	Isosphaeraceae	Singulisphaera	uncultured Singulisphaera sp.	1	0	20	3	11	8	1	2	0	0	4	0	0	0	0	0	0	5	4	0	0	0	16	2	0	2	0	0	1	0	0	0	13	15	0	1	0	0	0	0	6
1101:13107:17149__R_053	Bacteria		Planctomycetes	Planctomycetia	Planctomycetales	Isosphaeraceae	Singulisphaera	uncultured Singulisphaera sp.	0	0	0	0	0	1	0	0	0	0	2	1	0	0	1	0	0	0	1	3	1	0	0	0	27	0	0	0	1	0	0	0	3	8	1	0	0	0	0	0	1
1101:15129:24956__R_023	Bacteria		Planctomycetes	Planctomycetia	Planctomycetales	Isosphaeraceae	Singulisphaera	uncultured Singulisphaera sp.	0	0	3	0	0	7	3	0	0	6	0	0	1	12	0	0	0	4	0	0	1	0	34	0	0	0	0	0	0	1	0	0	0	0	0	2	0	0	0	0	0
1101:18153:9287__R_067	Bacteria		Planctomycetes	Planctomycetia	Planctomycetales	Isosphaeraceae	Singulisphaera	uncultured Singulisphaera sp.	2	0	0	0	6	1	0	0	0	0	5	2	2	0	1	0	0	0	1	0	0	0	1	0	0	0	3	0	1	2	0	1	0	0	0	1	0	0	0	0	2
1101:18400:16206__R_096	Bacteria		Planctomycetes	Planctomycetia	Planctomycetales	Isosphaeraceae	Singulisphaera	uncultured Singulisphaera sp.	0	0	0	0	0	0	0	0	0	0	0	0	0	7	0	0	0	0	0	0	1	0	0	0	0	0	0	0	0	0	0	0	0	7	0	0	0	0	0	0	12
1101:19415:9194__R_003	Bacteria		Planctomycetes	Planctomycetia	Planctomycetales	Isosphaeraceae	Singulisphaera	uncultured Singulisphaera sp.	0	0	50	0	7	0	0	0	1	0	4	1	1	1	0	5	0	0	0	0	1	0	0	0	0	0	7	0	1	0	0	28	1	0	0	0	0	0	0	8	2
1101:20186:3838__S_061	Bacteria		Planctomycetes	Planctomycetia	Planctomycetales	Isosphaeraceae	Singulisphaera	uncultured Singulisphaera sp.	0	0	0	0	0	0	0	0	0	0	0	0	0	0	0	0	0	0	0	0	0	0	0	0	0	0	0	0	0	0	0	0	0	0	0	0	0	0	0	0	0
1101:7079:25700__R_102	Bacteria		Planctomycetes	Planctomycetia	Planctomycetales	Isosphaeraceae	Singulisphaera	uncultured Singulisphaera sp.	0	0	0	0	0	0	0	0	0	0	0	0	1	0	1	0	0	0	0	0	0	0	0	0	0	0	10	0	0	0	0	0	0	0	0	0	0	0	0	0	0
1101:7114:16967__R_022	Bacteria		Planctomycetes	Planctomycetia	Planctomycetales	Isosphaeraceae	Singulisphaera	uncultured Singulisphaera sp.	0	0	0	0	0	2	0	0	0	0	0	0	0	5	0	0	1	0	0	0	0	14	0	0	1	0	0	0	0	2	0	0	0	0	0	0	0	2	0	0	0
1101:7147:14375__R_120	Bacteria		Planctomycetes	Planctomycetia	Planctomycetales	Isosphaeraceae	Singulisphaera	uncultured Singulisphaera sp.	3	0	0	1	1	0	0	0	0	2	0	0	0	1	1	0	0	0	0	0	0	0	7	0	0	0	5	0	0	0	0	0	34	1	1	0	0	0	0	0	0
1101:7307:20252__S_082	Bacteria		Planctomycetes	Planctomycetia	Planctomycetales	Isosphaeraceae	Singulisphaera	uncultured Singulisphaera sp.	0	0	0	0	0	0	0	0	0	0	0	0	0	0	0	0	0	0	0	0	0	0	0	0	0	0	0	0	0	0	0	0	0	0	0	0	0	0	0	0	0
1102:10178:23184__R_022	Bacteria		Planctomycetes	Planctomycetia	Planctomycetales	Isosphaeraceae	Singulisphaera	uncultured Singulisphaera sp.	0	19	4	2	10	8	0	0	0	1	0	0	0	10	10	0	4	2	0	0	3	33	0	0	0	0	0	0	0	0	0	0	25	2	0	4	0	0	1	0	10
1102:11294:13275__R_005	Bacteria		Planctomycetes	Planctomycetia	Planctomycetales	Isosphaeraceae	Singulisphaera	uncultured Singulisphaera sp.	0	0	2	0	2	0	0	2	0	0	0	0	0	1	1	2	0	0	0	0	0	0	0	0	0	0	0	0	0	0	0	0	0	0	0	0	0	0	0	0	0
1102:15870:6263__R_102	Bacteria		Planctomycetes	Planctomycetia	Planctomycetales	Isosphaeraceae	Singulisphaera	uncultured Singulisphaera sp.	0	0	0	0	0	0	0	0	0	0	0	0	0	0	0	0	0	0	0	0	0	0	0	0	0	0	0	0	0	0	0	0	0	0	0	0	0	0	0	0	0
1102:20108:15481__R_097	Bacteria		Planctomycetes	Planctomycetia	Planctomycetales	Isosphaeraceae	Singulisphaera	uncultured Singulisphaera sp.	0	0	0	0	0	0	0	0	0	0	0	0	6	0	0	0	0	0	0	0	0	0	0	0	0	0	0	0	0	0	0	0	0	0	0	0	0	0	0	0	0
1102:21284:17259__R_023	Bacteria		Planctomycetes	Planctomycetia	Planctomycetales	Isosphaeraceae	Singulisphaera	uncultured Singulisphaera sp.	0	0	0	0	0	0	0	0	0	0	0	0	0	0	0	0	0	0	0	0	0	0	3	0	0	0	0	0	0	0	0	0	0	0	0	0	0	0	0	0	0
1102:23581:23812__S_067	Bacteria		Planctomycetes	Planctomycetia	Planctomycetales	Isosphaeraceae	Singulisphaera	uncultured Singulisphaera sp.	0	0	0	0	0	0	0	0	0	0	0	0	0	0	0	0	0	0	0	0	0	0	2	0	0	0	0	0	0	0	0	0	0	0	0	0	0	0	1	0	0
1102:26275:12544__R_038	Bacteria		Planctomycetes	Planctomycetia	Planctomycetales	Isosphaeraceae	Singulisphaera	uncultured Singulisphaera sp.	0	0	0	0	0	1	0	0	1	0	0	0	0	0	0	0	0	0	0	0	0	0	0	0	0	0	0	0	0	1	0	0	1	3	0	0	0	41	0	0	1
1103:12703:6481__R_023	Bacteria		Planctomycetes	Planctomycetia	Planctomycetales	Isosphaeraceae	Singulisphaera	uncultured Singulisphaera sp.	0	0	0	0	0	5	0	0	0	0	0	0	0	0	0	0	0	0	0	0	0	0	28	0	0	1	0	0	0	10	0	0	0	0	0	0	0	0	0	0	0
1103:12837:13464__R_091	Bacteria		Planctomycetes	Planctomycetia	Planctomycetales	Isosphaeraceae	Singulisphaera	uncultured Singulisphaera sp.	0	0	0	0	0	0	0	0	0	0	0	0	0	0	0	0	0	0	0	0	0	0	0	0	0	0	0	0	0	0	0	0	0	0	0	0	0	0	0	0	0
1103:12839:14093__R_019	Bacteria		Planctomycetes	Planctomycetia	Planctomycetales	Isosphaeraceae	Singulisphaera	uncultured Singulisphaera sp.	0	0	0	0	0	0	0	0	0	0	0	0	0	0	0	0	0	0	34	0	0	0	0	0	0	0	0	0	0	0	0	0	0	0	0	0	0	0	0	0	0
1103:14446:8587__S_033	Bacteria		Planctomycetes	Planctomycetia	Planctomycetales	Isosphaeraceae	Singulisphaera	uncultured Singulisphaera sp.	0	0	0	0	0	0	0	0	0	0	0	0	0	0	0	0	0	0	0	0	0	0	0	0	0	0	0	1	0	0	0	0	0	0	0	0	0	0	0	0	0
1103:18342:28038__R_103	Bacteria		Planctomycetes	Planctomycetia	Planctomycetales	Isosphaeraceae	Singulisphaera	uncultured Singulisphaera sp.	20	3	0	0	1	0	2	0	0	0	0	0	0	5	0	0	0	2	0	0	0	0	2	0	0	1	0	0	0	0	0	0	0	0	0	0	0	0	0	0	0
1103:19412:10815__S_070	Bacteria		Planctomycetes	Planctomycetia	Planctomycetales	Isosphaeraceae	Singulisphaera	uncultured Singulisphaera sp.	0	0	0	0	0	0	0	0	0	0	0	0	0	0	0	0	0	0	0	0	0	0	0	0	0	0	0	0	0	0	0	0	0	0	0	0	0	0	0	0	0
1103:21272:7689__S_054	Bacteria		Planctomycetes	Planctomycetia	Planctomycetales	Isosphaeraceae	Singulisphaera	uncultured Singulisphaera sp.	0	0	0	0	0	1	0	0	0	0	0	0	0	0	0	0	0	0	0	0	0	0	0	0	0	0	0	0	0	0	0	0	0	0	0	0	0	0	0	0	0
1103:22573:10734__S_111	Bacteria		Planctomycetes	Planctomycetia	Planctomycetales	Isosphaeraceae	Singulisphaera	uncultured Singulisphaera sp.	0	0	1	0	0	0	1	0	0	0	0	0	0	1	0	0	0	0	0	0	0	0	18	0	0	0	0	0	0	0	0	0	0	0	0	0	0	0	0	0	0
1103:26461:8201__S_117	Bacteria		Planctomycetes	Planctomycetia	Planctomycetales	Isosphaeraceae	Singulisphaera	uncultured Singulisphaera sp.	0	0	0	0	0	4	0	0	1	0	12	0	0	0	0	0	0	0	0	0	0	0	0	0	0	0	0	0	0	0	0	0	0	3	0	0	0	0	0	0	0
1103:5763:14661__R_123	Bacteria		Planctomycetes	Planctomycetia	Planctomycetales	Isosphaeraceae	Singulisphaera	uncultured Singulisphaera sp.	0	0	0	0	0	0	0	0	0	0	0	0	3	0	0	0	0	0	0	0	0	0	0	0	0	0	0	0	0	0	0	0	0	0	0	0	0	0	0	0	0
1104:10036:8905__S_045	Bacteria		Planctomycetes	Planctomycetia	Planctomycetales	Isosphaeraceae	Singulisphaera	uncultured Singulisphaera sp.	0	0	0	0	0	0	0	0	0	0	0	0	0	0	0	0	0	0	0	0	0	0	0	0	0	0	0	0	0	0	0	0	0	0	0	0	0	0	0	0	0
1104:10150:6971__R_033	Bacteria		Planctomycetes	Planctomycetia	Planctomycetales	Isosphaeraceae	Singulisphaera	uncultured Singulisphaera sp.	0	0	4	0	11	0	0	0	0	0	0	0	0	2	0	0	0	0	0	0	0	0	8	0	0	1	3	0	0	0	0	0	3	0	0	0	0	2	0	0	0
1104:13102:3805__R_117	Bacteria		Planctomycetes	Planctomycetia	Planctomycetales	Isosphaeraceae	Singulisphaera	uncultured Singulisphaera sp.	0	0	0	1	0	0	0	0	0	0	0	0	0	0	0	0	0	0	0	0	0	0	0	0	0	0	0	0	0	0	0	0	0	0	0	0	0	0	0	0	0
1104:17204:15752__R_033	Bacteria		Planctomycetes	Planctomycetia	Planctomycetales	Isosphaeraceae	Singulisphaera	uncultured Singulisphaera sp.	0	0	0	0	0	0	0	0	0	0	0	0	0	1	0	0	1	0	0	0	0	0	0	0	0	0	0	0	0	1	0	0	19	0	0	0	0	0	0	0	0
1104:18747:10902__R_041	Bacteria		Planctomycetes	Planctomycetia	Planctomycetales	Isosphaeraceae	Singulisphaera	uncultured Singulisphaera sp.	0	0	0	0	0	0	0	0	0	0	0	0	0	0	0	0	0	0	0	0	1	0	0	0	0	0	0	0	0	0	0	0	0	0	0	0	0	0	0	0	4
1104:18994:11944__R_114	Bacteria		Planctomycetes	Planctomycetia	Planctomycetales	Isosphaeraceae	Singulisphaera	uncultured Singulisphaera sp.	0	0	0	0	0	0	0	0	0	0	0	0	0	3	0	0	0	0	0	0	0	0	0	0	0	0	0	0	0	0	0	0	0	0	0	0	0	0	0	0	0
1104:19698:15524__R_034	Bacteria		Planctomycetes	Planctomycetia	Planctomycetales	Isosphaeraceae	Singulisphaera	uncultured Singulisphaera sp.	0	0	0	0	6	0	0	0	0	0	6	0	4	0	16	0	0	0	0	0	1	0	0	0	0	28	0	0	0	7	0	0	0	25	0	8	0	0	0	0	0
1104:20478:23162__R_100	Bacteria		Planctomycetes	Planctomycetia	Planctomycetales	Isosphaeraceae	Singulisphaera	uncultured Singulisphaera sp.	0	0	0	0	0	0	0	0	0	0	2	0	0	0	0	0	0	0	0	0	0	0	0	0	0	0	0	0	0	0	0	0	0	4	0	0	0	0	0	0	0
2101:12759:12341__R_082	Bacteria		Planctomycetes	Planctomycetia	Planctomycetales	Isosphaeraceae	Singulisphaera	uncultured Singulisphaera sp.	0	0	0	0	0	0	0	0	0	0	0	0	0	0	0	0	0	0	0	0	0	0	0	0	0	0	0	0	0	0	0	0	0	0	0	0	0	0	0	0	0
2101:21020:20847__R_001	Bacteria		Planctomycetes	Planctomycetia	Planctomycetales	Isosphaeraceae	Singulisphaera	uncultured Singulisphaera sp.	6	0	0	0	0	3	0	1	0	0	0	0	0	0	0	0	0	0	0	3	0	0	0	0	0	0	0	0	0	0	0	0	0	0	0	0	0	0	0	0	0
2101:28630:11009__S_028	Bacteria		Planctomycetes	Planctomycetia	Planctomycetales	Isosphaeraceae	Singulisphaera	uncultured Singulisphaera sp.	0	0	0	0	0	0	0	0	0	0	0	0	0	0	0	0	0	0	0	0	0	0	0	0	0	3	0	0	0	0	0	0	0	0	0	0	0	0	0	0	0
2101:8684:5289__R_109	Bacteria		Planctomycetes	Planctomycetia	Planctomycetales	Isosphaeraceae	Singulisphaera	uncultured Singulisphaera sp.	0	0	0	0	0	0	0	0	0	0	0	0	0	0	0	0	0	0	0	0	0	0	0	0	0	0	0	0	0	0	0	0	2	0	0	0	0	0	0	0	0
2102:28966:12847__R_058	Bacteria		Planctomycetes	Planctomycetia	Planctomycetales	Isosphaeraceae	Singulisphaera	uncultured Singulisphaera sp.	0	0	0	0	0	0	0	0	0	0	0	0	0	0	0	0	0	0	0	0	0	0	0	0	0	0	0	0	0	0	0	0	0	0	0	0	0	0	0	0	0
2103:14625:7935__S_047	Bacteria		Planctomycetes	Planctomycetia	Planctomycetales	Isosphaeraceae	Singulisphaera	uncultured Singulisphaera sp.	0	0	0	0	0	0	0	0	0	0	0	0	0	0	0	0	0	0	0	0	0	0	0	0	0	0	0	0	0	0	0	0	0	0	0	0	0	0	0	0	0
2103:18721:15992__S_076	Bacteria		Planctomycetes	Planctomycetia	Planctomycetales	Isosphaeraceae	Singulisphaera	uncultured Singulisphaera sp.	0	0	6	0	0	0	0	0	2	0	0	0	0	0	0	0	0	0	0	0	0	0	0	0	0	0	0	0	0	0	0	0	0	0	0	0	0	0	0	0	0
2103:3318:10313__S_076	Bacteria		Planctomycetes	Planctomycetia	Planctomycetales	Isosphaeraceae	Singulisphaera	uncultured Singulisphaera sp.	0	0	0	0	0	0	0	0	0	0	0	0	0	0	0	0	0	0	0	0	0	0	0	0	0	0	0	0	0	0	0	0	0	0	0	0	0	0	0	0	0
2104:13475:12231__S_096	Bacteria		Planctomycetes	Planctomycetia	Planctomycetales	Isosphaeraceae	Singulisphaera	uncultured Singulisphaera sp.	0	0	0	0	0	0	0	0	0	0	0	0	0	0	0	0	0	0	0	0	0	0	0	0	0	0	0	0	0	0	0	0	0	0	0	0	0	0	0	0	0
2104:18707:6924__R_050	Bacteria		Planctomycetes	Planctomycetia	Planctomycetales	Isosphaeraceae	Singulisphaera	uncultured Singulisphaera sp.	2	0	0	0	1	0	1	0	0	0	0	0	0	0	0	0	0	0	0	0	0	0	0	0	0	0	0	0	0	0	0	0	0	0	0	3	0	0	0	0	0
2104:19311:5618__R_107	Bacteria		Planctomycetes	Planctomycetia	Planctomycetales	Isosphaeraceae	Singulisphaera	uncultured Singulisphaera sp.	0	4	1	15	13	2	1	0	0	0	2	3	6	2	0	2	1	8	0	0	0	0	8	0	20	0	6	0	0	2	0	0	0	7	0	3	0	22	8	0	2
2104:7857:11108__S_024	Bacteria		Planctomycetes	Planctomycetia	Planctomycetales	Isosphaeraceae	Singulisphaera	uncultured Singulisphaera sp.	0	0	0	0	0	0	0	0	0	0	0	0	0	0	0	0	0	0	0	0	0	0	0	0	0	0	0	0	0	0	0	0	0	0	0	0	0	0	0	0	0
2104:9712:5086__S_021	Bacteria		Planctomycetes	Planctomycetia	Planctomycetales	Isosphaeraceae	Singulisphaera	uncultured Singulisphaera sp.	0	0	0	0	0	0	4	0	0	0	0	0	0	3	0	0	0	0	0	0	0	0	0	0	0	0	0	0	0	0	0	0	0	0	0	0	0	0	0	0	0
1102:12451:24847__S_017	Bacteria		Planctomycetes	Planctomycetia	Planctomycetales	Isosphaeraceae	Singulisphaera		0	0	0	0	0	0	0	0	0	0	0	0	0	0	0	0	0	0	0	0	0	0	0	0	0	0	0	0	0	0	0	0	0	0	0	0	0	0	0	0	0
1104:9260:6126__R_072	Bacteria		Planctomycetes	Planctomycetia	Planctomycetales	Isosphaeraceae	Singulisphaera		0	0	0	0	0	0	0	0	0	0	0	0	0	0	0	0	0	0	0	0	0	0	0	0	0	0	0	0	0	0	0	0	0	0	0	0	0	0	0	0	0
1101:11001:18387__S_049	Bacteria		Planctomycetes	Planctomycetia	Planctomycetales	Isosphaeraceae			0	1	0	0	0	0	4	0	0	0	0	0	0	1	0	0	0	0	0	0	0	0	1	0	0	0	0	0	0	0	0	1	0	1	0	0	0	0	0	0	0
1101:12957:25651__R_056	Bacteria		Planctomycetes	Planctomycetia	Planctomycetales	Isosphaeraceae			0	0	1	6	4	0	0	1	0	1	1	0	0	4	6	0	0	8	0	0	0	1	0	0	6	0	12	0	0	0	0	0	3	12	0	2	0	0	0	0	0
1101:14655:16316__R_100	Bacteria		Planctomycetes	Planctomycetia	Planctomycetales	Isosphaeraceae			0	0	0	0	0	0	0	0	0	0	0	0	2	0	0	0	0	0	0	0	0	0	0	0	0	0	0	0	0	0	0	0	0	0	0	0	0	0	0	0	0
1101:15349:27172__S_122	Bacteria		Planctomycetes	Planctomycetia	Planctomycetales	Isosphaeraceae			0	0	0	0	0	1	0	0	0	0	0	0	0	1	0	0	0	0	0	0	0	0	0	0	0	0	2	0	0	0	0	0	0	0	0	1	0	0	0	0	0
1101:19593:11332__R_036	Bacteria		Planctomycetes	Planctomycetia	Planctomycetales	Isosphaeraceae			0	0	0	0	0	0	0	0	0	0	0	0	0	0	0	0	0	0	0	0	0	0	0	0	0	0	0	0	0	0	0	0	0	0	0	5	0	0	0	0	0
1101:22351:9008__R_028	Bacteria		Planctomycetes	Planctomycetia	Planctomycetales	Isosphaeraceae			0	0	0	0	0	0	0	0	0	0	0	0	0	0	0	0	0	0	0	0	0	0	0	0	0	0	0	46	0	0	0	0	0	0	0	0	0	0	0	0	0
1101:25913:13608__S_058	Bacteria		Planctomycetes	Planctomycetia	Planctomycetales	Isosphaeraceae			0	0	0	0	0	0	0	0	0	0	0	0	0	0	0	0	0	0	0	0	0	0	0	0	0	0	0	0	0	0	0	0	0	0	0	0	0	0	0	0	0
1101:26642:8338__R_065	Bacteria		Planctomycetes	Planctomycetia	Planctomycetales	Isosphaeraceae			0	0	0	1	0	15	0	0	0	0	0	1	5	1	0	0	1	0	0	2	1	0	1	0	0	1	6	0	0	4	0	0	1	2	1	1	0	0	0	0	0
1101:28155:20588__R_025	Bacteria		Planctomycetes	Planctomycetia	Planctomycetales	Isosphaeraceae			9	0	0	4	14	15	2	2	0	0	4	2	1	0	1	0	0	12	2	0	4	0	0	0	38	6	0	0	0	0	0	0	0	0	8	0	0	1	20	4	2
1101:28457:13907__R_027	Bacteria		Planctomycetes	Planctomycetia	Planctomycetales	Isosphaeraceae			0	0	0	0	1	1	0	0	0	0	6	3	1	1	1	0	22	0	0	0	0	0	9	0	0	0	31	0	0	3	0	0	0	0	0	0	0	0	0	0	4
1101:9055:4734__R_028	Bacteria		Planctomycetes	Planctomycetia	Planctomycetales	Isosphaeraceae			0	0	0	5	1	0	0	2	0	0	0	0	0	1	0	0	0	0	0	0	0	0	0	0	0	0	0	9	0	0	0	0	0	0	1	0	0	0	0	0	5
1102:10616:15567__R_049	Bacteria		Planctomycetes	Planctomycetia	Planctomycetales	Isosphaeraceae			0	0	0	0	0	0	1	0	0	0	0	0	0	0	0	0	2	2	0	0	0	0	0	0	0	0	4	0	0	0	0	0	0	0	2	0	0	0	0	0	0
1102:16897:23568__R_112	Bacteria		Planctomycetes	Planctomycetia	Planctomycetales	Isosphaeraceae			0	0	0	0	0	0	0	0	0	0	1	0	0	0	0	0	0	0	0	0	0	0	0	0	0	2	0	0	0	0	0	0	0	1	0	1	0	0	0	0	5
1102:16996:19639__S_043	Bacteria		Planctomycetes	Planctomycetia	Planctomycetales	Isosphaeraceae			0	0	0	0	0	0	0	0	0	0	0	0	0	0	0	0	0	0	0	0	0	0	0	0	0	0	0	0	0	0	0	0	0	0	0	0	0	0	0	0	0
1102:19102:17703__R_057	Bacteria		Planctomycetes	Planctomycetia	Planctomycetales	Isosphaeraceae			0	2	4	1	1	1	10	0	1	0	1	0	0	0	1	0	0	1	0	0	0	0	0	6	0	0	1	0	0	3	0	0	1	2	0	1	0	1	0	0	2
1102:19527:16650__R_008	Bacteria		Planctomycetes	Planctomycetia	Planctomycetales	Isosphaeraceae			0	0	0	0	0	6	0	5	0	0	0	0	0	0	0	0	0	0	0	0	0	0	0	0	0	0	0	0	0	0	0	0	0	0	0	0	0	0	0	0	0
1102:22388:8359__R_107	Bacteria		Planctomycetes	Planctomycetia	Planctomycetales	Isosphaeraceae			39	42	0	0	0	15	0	6	8	0	0	0	14	0	0	0	15	0	0	1	2	0	18	0	0	0	5	0	0	0	0	0	0	10	9	0	0	0	0	0	9
1102:7797:14729__R_102	Bacteria		Planctomycetes	Planctomycetia	Planctomycetales	Isosphaeraceae			0	0	0	1	0	1	0	0	0	0	0	2	0	0	0	0	0	0	0	0	0	0	0	0	0	0	1	0	0	0	0	0	0	5	3	0	0	0	0	0	0
1101:27330:19292__R_019	Bacteria		Planctomycetes	Planctomycetia	Planctomycetales	Isosphaeraceae			0	0	0	0	5	10	0	2	0	0	0	0	4	12	0	0	6	0	28	0	1	0	3	0	0	0	0	0	0	0	0	0	0	3	8	6	0	0	0	0	0
1102:13045:22348__S_102	Bacteria		Planctomycetes	Planctomycetia	Planctomycetales	Isosphaeraceae			8	0	0	0	1	0	0	0	0	0	0	0	0	0	0	0	0	0	0	0	0	0	0	0	2	0	0	0	1	0	0	0	0	0	0	0	0	0	0	0	0
1102:26493:8780__R_122	Bacteria		Planctomycetes	Planctomycetia	Planctomycetales	Isosphaeraceae			0	0	0	0	0	0	0	0	0	0	0	0	0	0	0	0	0	0	3	0	0	0	0	0	0	0	0	0	0	0	0	0	0	0	0	0	0	0	0	0	0
1102:5675:18196__R_066	Bacteria		Planctomycetes	Planctomycetia	Planctomycetales	Isosphaeraceae			0	0	9	0	2	3	2	0	0	2	2	5	3	5	5	8	5	0	0	0	2	0	1	0	0	0	0	0	0	0	0	0	0	8	0	0	0	0	0	0	0
1103:22427:21637__S_041	Bacteria		Planctomycetes	Planctomycetia	Planctomycetales	Isosphaeraceae			0	0	0	0	0	0	0	0	0	0	0	0	0	0	0	0	0	0	0	0	0	0	0	0	0	0	0	0	0	0	0	0	0	0	0	0	0	0	0	0	0
1103:22520:15416__R_026	Bacteria		Planctomycetes	Planctomycetia	Planctomycetales	Isosphaeraceae			0	11	16	0	2	1	0	0	0	0	0	0	2	0	3	0	0	0	0	0	0	0	0	0	0	20	0	0	0	6	0	0	3	8	0	0	0	0	0	0	0
1104:11230:11714__R_095	Bacteria		Planctomycetes	Planctomycetia	Planctomycetales	Isosphaeraceae			0	0	0	0	0	0	0	0	0	0	0	0	0	0	0	0	0	0	0	0	0	0	0	0	0	0	0	0	0	0	0	0	0	0	0	0	0	0	0	0	0
1104:16206:11983__R_033	Bacteria		Planctomycetes	Planctomycetia	Planctomycetales	Isosphaeraceae			0	0	0	0	0	0	0	0	0	0	0	0	0	0	0	0	0	0	0	0	0	0	0	0	1	0	0	0	0	0	0	0	6	1	0	0	0	0	0	0	0
2101:12770:24223__R_032	Bacteria		Planctomycetes	Planctomycetia	Planctomycetales	Isosphaeraceae			0	0	0	6	0	1	0	0	0	0	3	0	0	0	0	0	0	0	0	0	0	0	0	0	0	0	0	0	0	0	0	12	0	0	0	0	0	0	0	0	3
2102:7588:6148__S_093	Bacteria		Planctomycetes	Planctomycetia	Planctomycetales	Isosphaeraceae			0	0	0	0	3	0	0	0	3	0	0	0	0	1	1	0	0	0	0	0	0	0	0	0	0	2	0	0	0	0	0	0	0	0	0	0	0	0	0	0	0
2102:9280:7345__R_109	Bacteria		Planctomycetes	Planctomycetia	Planctomycetales	Isosphaeraceae			0	0	0	0	0	0	0	0	0	0	0	0	0	0	0	0	0	0	0	0	0	0	0	0	0	0	0	0	0	0	0	0	0	0	0	0	0	0	0	0	0
2103:21517:24235__S_048	Bacteria		Planctomycetes	Planctomycetia	Planctomycetales	Isosphaeraceae			0	0	0	0	0	0	0	0	0	0	0	0	0	0	0	0	2	0	0	0	0	0	0	0	0	0	0	0	0	0	0	0	0	0	0	0	0	0	0	0	0
1101:20080:11244__S_005	Bacteria		Planctomycetes	Planctomycetia	Planctomycetales	Planctomycetaceae	Blastopirellula	uncultured Blastopirellula sp.	0	0	0	0	0	0	0	0	0	0	0	0	0	0	0	0	0	0	0	0	0	0	0	0	0	0	0	0	0	0	0	0	0	0	0	0	0	0	0	0	0
1102:10338:21234__R_112	Bacteria		Planctomycetes	Planctomycetia	Planctomycetales	Planctomycetaceae	Blastopirellula	uncultured Blastopirellula sp.	0	0	1	2	0	6	2	0	1	0	1	3	2	3	0	0	11	0	0	0	2	0	0	0	0	0	2	0	1	0	0	0	0	4	3	11	0	0	0	0	5
1102:20383:8020__S_079	Bacteria		Planctomycetes	Planctomycetia	Planctomycetales	Planctomycetaceae	Blastopirellula	uncultured Blastopirellula sp.	0	0	0	0	0	0	0	0	0	0	0	0	0	0	0	0	0	0	0	0	0	0	0	0	0	0	0	0	0	0	0	0	0	0	0	0	0	0	0	0	0
1101:10088:26738__R_057	Bacteria		Planctomycetes	Planctomycetia	Planctomycetales	Planctomycetaceae	Blastopirellula	uncultured Blastopirellula sp.	0	0	0	0	0	0	0	0	0	0	0	0	0	0	0	0	0	0	0	0	0	0	0	0	0	14	0	0	0	0	0	0	0	0	0	0	0	0	0	0	0
1101:17426:26218__S_097	Bacteria		Planctomycetes	Planctomycetia	Planctomycetales	Planctomycetaceae	Blastopirellula	uncultured Blastopirellula sp.	0	0	0	0	0	0	0	0	0	0	0	0	0	0	0	0	0	0	0	0	0	0	0	0	0	0	0	0	0	0	0	0	0	0	0	0	0	0	0	0	0
1101:21336:24952__S_121	Bacteria		Planctomycetes	Planctomycetia	Planctomycetales	Planctomycetaceae	Blastopirellula	uncultured Blastopirellula sp.	0	0	0	0	0	0	0	0	0	0	0	0	0	0	0	1	0	0	0	0	0	0	0	0	0	0	0	0	0	0	0	0	0	0	0	0	0	1	0	0	0
1104:26077:16768__R_123	Bacteria		Planctomycetes	Planctomycetia	Planctomycetales	Planctomycetaceae	Blastopirellula	uncultured Blastopirellula sp.	0	0	0	0	0	8	0	0	0	0	0	0	0	0	0	0	0	0	0	0	0	0	0	0	0	0	0	0	0	0	0	0	0	0	0	0	0	0	0	0	0
2101:10800:3603__S_080	Bacteria		Planctomycetes	Planctomycetia	Planctomycetales	Planctomycetaceae	Blastopirellula	uncultured Blastopirellula sp.	0	0	0	0	0	0	0	0	0	0	0	0	0	0	0	0	0	0	0	0	0	0	0	0	0	0	0	0	0	0	0	0	0	0	0	0	0	0	0	0	0
1101:13917:12808__R_075	Bacteria		Planctomycetes	Planctomycetia	Planctomycetales	Planctomycetaceae	Planctomyces	uncultured Planctomyces sp.	0	0	0	0	0	0	0	0	0	0	0	0	0	0	0	0	0	0	0	0	0	0	0	0	0	0	0	0	0	0	0	0	0	0	0	0	0	0	0	0	0
1101:14071:14466__R_114	Bacteria		Planctomycetes	Planctomycetia	Planctomycetales	Planctomycetaceae	Planctomyces	uncultured Planctomyces sp.	0	0	8	0	0	0	0	0	0	0	0	0	2	0	0	0	0	0	0	0	0	0	0	0	0	0	0	0	0	0	0	0	0	0	0	0	0	0	0	0	0
1101:15680:10669__R_127	Bacteria		Planctomycetes	Planctomycetia	Planctomycetales	Planctomycetaceae	Planctomyces	uncultured Planctomyces sp.	10	15	8	39	11	29	24	0	6	3	3	4	40	13	45	0	89	7	13	6	3	1	12	10	42	21	13	2	1	15	0	0	26	31	0	48	4	62	83	3	44
1101:16054:6819__R_057	Bacteria		Planctomycetes	Planctomycetia	Planctomycetales	Planctomycetaceae	Planctomyces	uncultured Planctomyces sp.	0	1	5	0	0	0	0	23	0	0	0	1	0	0	0	0	1	0	0	0	0	0	16	0	0	22	11	55	0	22	0	0	0	0	0	16	0	0	0	2	0
1101:24396:8787__R_064	Bacteria		Planctomycetes	Planctomycetia	Planctomycetales	Planctomycetaceae	Planctomyces	uncultured Planctomyces sp.	0	0	0	0	0	0	0	0	0	0	0	0	0	0	0	0	0	0	0	0	0	0	0	0	0	0	0	0	0	0	0	0	0	0	0	0	0	0	0	0	0
1102:10492:13898__S_071	Bacteria		Planctomycetes	Planctomycetia	Planctomycetales	Planctomycetaceae	Planctomyces	uncultured Planctomyces sp.	0	0	0	0	0	0	0	0	0	0	0	0	0	0	0	0	0	0	0	0	0	0	0	0	0	0	0	0	0	0	0	0	0	0	0	0	0	0	0	0	0
1102:19076:12111__S_086	Bacteria		Planctomycetes	Planctomycetia	Planctomycetales	Planctomycetaceae	Planctomyces	uncultured Planctomyces sp.	0	0	0	0	0	0	0	1	0	0	0	0	0	0	0	0	0	0	0	0	0	0	0	0	0	0	0	0	0	0	0	0	0	0	0	0	0	0	0	0	0
1102:22336:27467__S_081	Bacteria		Planctomycetes	Planctomycetia	Planctomycetales	Planctomycetaceae	Planctomyces	uncultured Planctomyces sp.	0	0	0	0	0	0	0	0	0	0	0	0	0	0	0	0	0	0	0	0	0	0	0	0	0	0	0	0	0	0	0	0	0	0	0	0	0	0	0	0	0
1102:18403:20018__R_040	Bacteria		Planctomycetes	Planctomycetia	Planctomycetales	Planctomycetaceae	Planctomyces	uncultured Planctomyces sp.	0	0	0	0	0	0	0	0	0	0	0	0	0	0	0	0	0	0	0	0	0	0	0	0	0	0	0	0	0	0	0	0	0	0	0	0	0	0	0	1	0
1102:26758:19275__S_064	Bacteria		Planctomycetes	Planctomycetia	Planctomycetales	Planctomycetaceae	Planctomyces	uncultured Planctomyces sp.	0	0	0	0	0	0	0	0	0	0	0	0	0	0	0	0	0	0	0	0	0	0	0	0	0	0	0	0	0	0	0	0	0	0	0	0	0	0	0	0	0
1102:2981:16955__S_063	Bacteria		Planctomycetes	Planctomycetia	Planctomycetales	Planctomycetaceae	Planctomyces	uncultured Planctomyces sp.	0	0	0	0	0	0	0	0	0	0	0	0	0	0	0	0	0	0	0	0	0	0	0	0	0	0	0	0	0	0	0	0	0	0	0	0	0	0	0	0	0
1103:15558:10907__S_076	Bacteria		Planctomycetes	Planctomycetia	Planctomycetales	Planctomycetaceae	Planctomyces	uncultured Planctomyces sp.	0	0	0	0	0	0	0	0	0	0	0	0	0	0	0	0	0	0	0	0	0	0	0	0	0	0	0	0	0	0	0	0	0	0	0	0	0	0	0	0	0
2102:4353:16367__S_114	Bacteria		Planctomycetes	Planctomycetia	Planctomycetales	Planctomycetaceae	Planctomyces	uncultured Planctomyces sp.	0	0	0	0	0	0	0	0	0	0	0	0	0	0	0	0	0	0	0	0	0	0	0	0	0	0	0	0	0	0	0	0	0	0	0	0	0	0	0	0	0
2104:11048:18078__S_055	Bacteria		Planctomycetes	Planctomycetia	Planctomycetales	Planctomycetaceae	Planctomyces	uncultured Planctomyces sp.	0	0	0	0	0	0	0	0	0	0	0	0	0	0	0	0	0	0	0	0	0	0	0	0	0	0	0	0	0	0	0	0	0	0	0	0	0	0	0	0	0
1101:21468:13338__R_104	Bacteria		Planctomycetes	Planctomycetia	Planctomycetales	Planctomycetaceae	Schlesneria	uncultured Schlesneria sp.	0	0	0	0	0	0	0	0	0	0	0	0	0	0	0	0	0	0	0	0	0	0	0	0	0	0	0	0	0	0	0	0	0	0	0	0	0	0	0	0	0
1102:15504:12787__R_101	Bacteria		Planctomycetes	Planctomycetia	Planctomycetales	Planctomycetaceae	Schlesneria	uncultured Schlesneria sp.	0	0	0	0	0	0	0	0	0	0	0	0	0	0	0	0	0	0	0	0	0	0	0	0	0	2	0	0	0	0	0	0	0	0	0	0	0	0	0	2	0
1101:13763:18060__R_118	Bacteria		Planctomycetes	Planctomycetia	Planctomycetales	Planctomycetaceae			0	0	0	0	0	0	0	0	0	0	0	0	0	0	0	0	0	0	0	0	0	0	0	0	0	0	0	0	0	0	0	0	0	0	0	0	0	0	0	0	0
1101:14181:18990__S_061	Bacteria		Planctomycetes	Planctomycetia	Planctomycetales	Planctomycetaceae			0	0	0	0	0	0	0	0	0	0	0	0	0	0	0	0	0	0	0	0	0	0	0	0	0	0	0	0	0	0	0	0	0	0	0	0	0	0	0	0	0
1104:26195:12785__S_097	Bacteria		Planctomycetes	Planctomycetia	Planctomycetales	Planctomycetaceae			0	0	0	0	0	0	0	0	0	0	0	0	0	0	0	0	0	0	0	0	0	0	0	0	0	0	0	0	0	0	0	0	0	0	0	0	0	2	0	0	0
1101:11431:11278__S_068	Bacteria		Planctomycetes	Planctomycetia	Planctomycetales				0	0	0	0	0	0	0	0	0	0	0	0	0	0	0	0	0	0	0	0	0	0	0	0	0	0	0	0	0	0	0	0	0	0	0	0	0	0	0	0	0
1101:15204:4317__R_019	Bacteria		Planctomycetes	Planctomycetia	Planctomycetales				0	0	0	0	0	0	0	0	0	0	0	0	0	0	0	0	0	0	81	0	0	0	0	0	0	0	0	0	0	0	0	0	0	0	0	0	0	0	0	0	0
1101:16693:23802__S_092	Bacteria		Planctomycetes	Planctomycetia	Planctomycetales				0	0	0	0	0	0	0	0	0	0	0	0	0	0	0	0	0	0	0	0	0	0	0	0	0	0	0	0	0	0	0	0	0	0	0	0	0	0	0	0	0
1101:17453:28203__R_025	Bacteria		Planctomycetes	Planctomycetia	Planctomycetales				0	0	0	0	0	0	0	0	0	0	0	0	0	0	0	0	0	0	0	0	0	0	0	0	49	0	0	0	0	0	0	0	0	0	0	0	0	0	0	0	0
1101:17510:16629__R_097	Bacteria		Planctomycetes	Planctomycetia	Planctomycetales				0	0	0	1	0	1	0	0	0	0	1	0	0	0	0	0	0	0	0	0	0	1	0	0	0	0	0	0	0	0	0	0	0	0	0	0	0	1	0	0	0
1101:18258:25711__R_090	Bacteria		Planctomycetes	Planctomycetia	Planctomycetales				0	0	0	0	0	1	0	0	0	0	0	0	0	0	0	0	0	0	0	0	0	0	0	0	0	0	0	0	0	0	0	0	0	0	0	0	0	0	0	0	0
1101:21172:12455__R_050	Bacteria		Planctomycetes	Planctomycetia	Planctomycetales				0	0	0	0	0	0	0	0	0	0	0	0	0	0	0	0	5	0	0	0	1	0	0	0	0	0	0	0	0	0	0	0	0	0	0	0	0	0	0	0	0
1101:22955:13008__S_008	Bacteria		Planctomycetes	Planctomycetia	Planctomycetales				0	0	0	0	0	0	0	0	0	0	0	0	0	0	0	0	0	0	0	0	0	0	0	0	0	0	0	0	0	0	0	0	0	0	0	0	0	0	0	0	0
1101:23094:22548__S_051	Bacteria		Planctomycetes	Planctomycetia	Planctomycetales				0	0	0	0	0	0	0	0	0	0	0	0	0	0	0	0	0	0	0	0	0	1	0	0	0	0	0	0	0	0	0	0	0	0	0	0	0	0	0	0	0
1101:24407:14543__R_094	Bacteria		Planctomycetes	Planctomycetia	Planctomycetales				0	0	0	0	0	0	0	0	0	0	0	0	0	0	0	0	0	0	0	0	0	0	0	0	0	0	0	0	0	0	0	0	0	0	0	0	0	0	0	0	0
1101:24693:15351__S_038	Bacteria		Planctomycetes	Planctomycetia	Planctomycetales				0	0	0	0	0	0	0	0	0	0	2	0	0	0	0	0	0	1	0	0	0	0	0	0	0	0	0	0	0	0	0	0	0	0	0	0	0	0	0	0	0
1101:25617:21483__S_116	Bacteria		Planctomycetes	Planctomycetia	Planctomycetales				0	0	0	0	0	0	0	0	0	0	0	0	0	0	0	0	0	0	0	0	0	0	0	0	0	0	0	0	0	0	0	0	0	0	0	0	0	0	0	0	0
1101:9708:11654__S_034	Bacteria		Planctomycetes	Planctomycetia	Planctomycetales				0	0	0	0	0	0	0	0	0	0	0	0	0	0	0	0	0	0	0	0	0	0	0	0	0	0	0	0	0	0	0	0	0	0	0	0	0	0	0	0	0
1102:12862:12825__S_042	Bacteria		Planctomycetes	Planctomycetia	Planctomycetales				0	0	0	0	0	0	0	0	0	0	0	0	0	0	0	0	0	0	0	0	0	0	0	0	0	0	0	0	0	0	0	0	0	0	0	0	0	0	0	0	0
1102:12993:3473__R_057	Bacteria		Planctomycetes	Planctomycetia	Planctomycetales				0	0	0	0	0	0	0	0	0	0	0	0	0	0	0	0	1	0	0	0	0	0	0	0	3	0	2	0	0	0	0	0	0	0	0	0	0	0	0	0	0
1102:17052:28872__S_042	Bacteria		Planctomycetes	Planctomycetia	Planctomycetales				0	0	0	0	0	0	0	0	0	0	0	0	0	0	0	0	0	0	0	0	0	0	0	0	0	0	0	0	0	0	0	0	0	0	0	0	0	0	0	0	0
1102:21091:20538__S_006	Bacteria		Planctomycetes	Planctomycetia	Planctomycetales				0	0	0	0	0	0	0	0	0	0	0	0	0	0	0	0	1	0	0	0	0	0	0	0	0	0	0	0	0	0	0	0	0	0	0	0	0	0	0	0	0
1102:23492:20934__R_100	Bacteria		Planctomycetes	Planctomycetia	Planctomycetales				0	0	0	0	0	0	0	0	0	0	0	0	0	0	0	0	0	0	0	0	0	0	0	0	0	0	0	0	0	0	0	0	0	0	0	0	0	0	0	0	0
1102:25029:6890__S_050	Bacteria		Planctomycetes	Planctomycetia	Planctomycetales				0	0	0	2	0	0	0	0	0	0	0	0	1	0	0	0	0	0	0	0	0	0	0	0	0	0	0	0	0	0	0	0	0	0	0	0	0	0	0	3	0
1102:8716:9397__R_102	Bacteria		Planctomycetes	Planctomycetia	Planctomycetales				0	0	0	0	0	0	0	0	0	0	0	0	0	0	0	0	0	0	0	0	0	0	0	0	0	0	0	0	0	0	0	0	0	0	0	0	0	0	0	0	0
1101:11625:22846__R_005	Bacteria		Planctomycetes	Planctomycetia	Planctomycetales				0	0	0	1	2	0	0	0	0	0	0	0	0	0	0	0	0	0	0	0	0	0	0	0	0	0	0	0	0	0	0	0	0	0	0	0	0	0	0	0	0
1101:13530:15013__S_056	Bacteria		Planctomycetes	Planctomycetia	Planctomycetales				0	0	0	0	0	0	0	0	0	0	0	0	0	0	0	0	0	0	0	0	0	0	0	0	0	0	0	0	0	0	0	0	0	0	0	0	0	0	0	0	0
1101:15905:11774__S_087	Bacteria		Planctomycetes	Planctomycetia	Planctomycetales				0	0	0	0	0	0	0	0	0	0	0	0	0	0	0	0	0	0	0	0	0	0	0	0	0	0	0	0	0	0	0	0	0	0	0	0	0	0	0	0	0
1101:16513:16945__R_002	Bacteria		Planctomycetes	Planctomycetia	Planctomycetales				4	8	1	0	0	0	0	0	0	0	0	0	0	0	0	0	0	0	0	0	1	0	0	0	0	0	0	0	0	0	0	0	0	0	0	0	0	0	0	0	0
1101:16932:8974__R_017	Bacteria		Planctomycetes	Planctomycetia	Planctomycetales				0	0	0	0	0	0	0	0	0	0	0	0	0	0	0	0	7	0	0	0	0	0	0	0	0	0	2	0	0	0	0	0	0	0	0	0	0	0	0	0	0
1101:2306:17828__R_109	Bacteria		Planctomycetes	Planctomycetia	Planctomycetales				0	0	0	1	0	0	0	0	0	0	0	0	0	0	0	0	0	0	0	0	0	0	0	0	0	0	0	0	0	0	0	0	0	0	0	0	0	0	0	0	0
1101:23825:23888__S_027	Bacteria		Planctomycetes	Planctomycetia	Planctomycetales				0	0	0	0	0	0	0	0	0	0	0	0	0	0	0	0	0	0	0	0	0	0	0	0	0	0	0	0	0	0	0	0	0	0	0	0	0	0	0	0	0
1101:4130:19807__S_006	Bacteria		Planctomycetes	Planctomycetia	Planctomycetales				0	0	0	0	0	0	0	0	0	0	0	0	0	0	0	0	0	0	0	0	0	0	0	0	0	1	0	0	0	0	0	0	0	0	0	0	0	0	0	0	0
1101:6234:12749__S_006	Bacteria		Planctomycetes	Planctomycetia	Planctomycetales				0	0	0	0	0	0	0	6	0	0	0	0	0	0	0	0	0	0	0	0	0	0	0	0	0	0	0	0	0	0	0	0	0	0	0	0	0	0	0	0	0
1101:6237:25594__S_006	Bacteria		Planctomycetes	Planctomycetia	Planctomycetales				0	0	0	0	0	0	0	0	0	0	0	0	0	0	0	0	0	0	0	0	0	0	0	0	0	0	0	0	0	0	0	0	0	0	0	0	0	0	0	0	0
1102:11367:17466__R_127	Bacteria		Planctomycetes	Planctomycetia	Planctomycetales				0	0	0	0	0	0	0	0	0	0	0	0	0	0	0	0	0	0	0	0	0	0	0	0	0	0	0	0	0	0	0	0	0	0	0	0	0	0	0	0	0
1102:16012:27010__R_050	Bacteria		Planctomycetes	Planctomycetia	Planctomycetales				0	0	0	0	0	0	0	0	0	0	0	0	0	0	0	0	0	0	0	0	0	0	0	0	0	0	0	0	0	0	0	0	0	0	0	1	0	0	0	0	0
1102:17431:15005__R_045	Bacteria		Planctomycetes	Planctomycetia	Planctomycetales				0	0	0	0	0	0	0	0	0	0	0	0	1	0	0	0	0	1	0	0	0	0	0	0	0	0	0	0	0	0	0	0	0	0	0	3	0	0	0	0	0
1102:18493:10654__S_013	Bacteria		Planctomycetes	Planctomycetia	Planctomycetales				0	0	0	0	0	0	0	0	0	0	0	0	0	0	0	0	0	0	0	0	0	0	0	0	0	0	0	0	0	0	0	0	0	0	0	0	0	0	0	0	0
1102:21282:21006__S_044	Bacteria		Planctomycetes	Planctomycetia	Planctomycetales				0	0	0	0	0	0	0	0	0	0	0	0	0	0	0	0	0	0	0	0	0	0	0	0	0	0	0	0	0	0	0	0	0	0	0	0	0	0	0	0	0
1102:25942:9921__S_105	Bacteria		Planctomycetes	Planctomycetia	Planctomycetales				0	0	0	0	0	0	0	0	0	0	0	0	0	0	0	0	0	0	0	0	0	0	0	0	0	0	0	0	0	2	0	0	0	0	0	0	0	0	0	0	0
1102:26830:18613__S_005	Bacteria		Planctomycetes	Planctomycetia	Planctomycetales				0	0	0	0	0	0	0	0	0	0	0	0	0	0	0	0	0	0	0	0	0	0	0	0	0	0	0	0	0	0	0	0	0	0	0	0	0	0	0	0	0
[truncated: 3,352 more rows]
[truncated: 220 more columns]
